# Supplementary material for: Bicyclic (alkyl)(amino)carbene (BICAAC) as a metal-free catalyst for reduction of nitriles to amines
Source: Royal Society of Chemistry journal article supplement (doi:10.1039/d1cc06962d), 2022-01-01
Supplement: d1cc06962d1.pdf [file d1cc06962d1.pdf]

## Supporting Information

### **Bicyclic (alkyl)(amino)carbene (BICAAC) as a metal-free catalyst for reduction of nitriles to amines**

Nimisha Gautam, Ratan Logdi, Sreejyothi P, N. M. Rajendran, Ashwani K. Tiwari\*  
and Swadhin K. Mandal\*

Department of Chemical Sciences, Indian Institute of Science Education and Research  
Kolkata, Mohanpur 741246, India

\*Correspondence to: [swadhin.mandal@iiserkol.ac.in](mailto:swadhin.mandal@iiserkol.ac.in)

| <b>Table of Contents:</b>                                                              | <b>Page</b> |
|----------------------------------------------------------------------------------------|-------------|
| <b>1) General Information</b>                                                          | S3          |
| <b>2) Experimental Details</b>                                                         |             |
| 2.1) Experimental procedure for optimisation study of hydroboration<br>of nitriles     | S3          |
| 2.2) General experimental procedures for BICAAC catalyzed<br>hydroboration of nitriles | S5          |
| 2.3) Experimental procedure for gram-scale reaction                                    | S6          |
| 2.4) Conversion vs time plot                                                           | S7          |
| 2.5) Control reactions                                                                 | S7          |
| 2.6) Isotope experiment using DBpin                                                    | S13         |
| 2.7) Procedure for testing longevity of the catalyst                                   | S15         |
| 2.8) Procedure for isolation of N,N-diborylamine                                       | S16         |
| 2.9) Procedure for synthesis of amides from N,N-diborylamines                          | S19         |
| <b>3) Characterization</b>                                                             |             |
| 3.1) $^1\text{H}$ and $^{13}\text{C}\{^1\text{H}\}$ NMR Data of Isolated Products      | S19         |
| 3.2) $^1\text{H}$ and $^{13}\text{C}\{^1\text{H}\}$ NMR Spectra of Isolated Products   | S34         |

|                                                                                                 |      |
|-------------------------------------------------------------------------------------------------|------|
| 3.3) $^1\text{H}$ and $^{13}\text{C}\{^1\text{H}\}$ NMR Data of N-substituted amide products    | S78  |
| 3.4) $^1\text{H}$ and $^{13}\text{C}\{^1\text{H}\}$ NMR Spectra of N-substituted amide products | S79  |
| <b>4) DFT studies</b>                                                                           | S82  |
| <b>5) References</b>                                                                            | S171 |

## 1) General Information

All catalytic and control reactions were carried out under argon or nitrogen atmosphere using standard Schlenk techniques or inside a glovebox. All solvents were dried over sodium/benzophenone mixture or CaH<sub>2</sub> and distilled prior to use. All chemicals were purchased from Sigma-Aldrich or Alfa Aesar or TCI-India and used as received. Analytical thin layer chromatography (TLC) was performed on a Merck 60 F254 silica gel plate (0.25 mm thickness). Column chromatography was performed on Merck 60 silica gel (100-200 mesh). The <sup>1</sup>H, <sup>13</sup>C{<sup>1</sup>H}, <sup>19</sup>F{<sup>1</sup>H} and <sup>11</sup>B{<sup>1</sup>H} NMR spectra were recorded on JEOL ECS 400 MHz spectrometer and on a Bruker Avance III 500 MHz spectrometer in D<sub>2</sub>O or DMSO-d<sub>6</sub> or CD<sub>3</sub>OD with residual undeuterated solvent (eg. DMSO-d<sub>6</sub>, 2.50/39.52) as an internal standard. Chemical shifts (δ) are given in ppm, and J values are given in Hz. Evaporation of solvents was performed under reduced pressure using a rotary evaporator. All the glassware were kept in an oven at 120 °C for overnight before use. High-resolution mass spectrometry (HRMS) was obtained on a Bruker maXis impact.

Pinacolborane was obtained from Sigma Aldrich and stored under inert atmosphere in the glovebox. BICAAC was synthesized<sup>S1</sup> and stored under inert atmosphere in the MBraun glovebox maintained below 0.1 ppm of O<sub>2</sub> and H<sub>2</sub>O level. The reactions were performed with a standard 15 mL reaction tube equipped with a stir bar and a screw cap. DBpin was prepared by following literature procedure.<sup>S2</sup> The substrates (**2x-2z**, **2ad**) were synthesised according to the literature procedure.<sup>S3,S4,S5</sup>

## 2) Experimental Details

### 2.1) Experimental procedure for optimisation study of hydroboration of nitriles

Inside a nitrogen-filled glovebox, an oven-dried 15 mL reaction tube was charged with 0.2 mmol of 4-bromo benzonitrile and a magnetic stirring bar, followed by addition of catalyst (5 mol%) and borane (0.5 mmol). The reaction mixture was stirred vigorously at room

temperature for 1-2 min. After that, the tube was sealed tightly with a screw cap and removed from the glovebox. The reaction tube was placed in a preheated oil bath at 60 °C and stirred for 16 h. After 16 h, the reaction mixture was cooled to room temperature and it was diluted with ~ 0.5-0.6 mL of CDCl<sub>3</sub> and <sup>1</sup>H NMR spectra was recorded to calculate the yield. NMR yields are based on unreacted substrate 2a.

**Table S1.** Optimisation of hydroboration of nitriles to diborylated amines

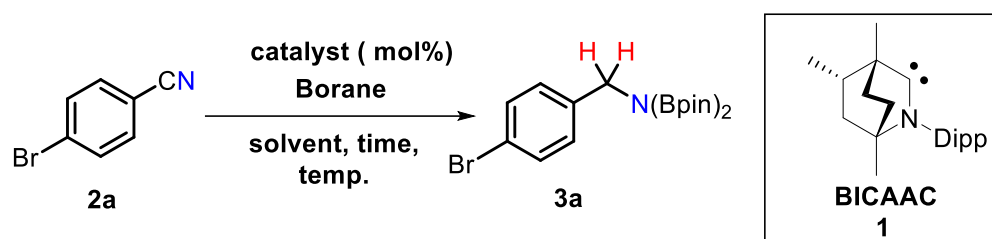

| SI No. | Catalyst (mol%)      | Borane (equiv.)    | Solvent     | Temp (°C) | Time (h)  | NMR yield (%) |
|--------|----------------------|--------------------|-------------|-----------|-----------|---------------|
| 1      | BICAAC (5)           | HBpin (2.5)        | THF         | 60        | 16        | NR            |
| 2      | BICAAC (5)           | HBpin (2.5)        | Toluene     | 60        | 16        | NR            |
| 3      | BICAAC (5)           | HBpin (2.5)        | ACN         | 60        | 16        | NR            |
| 4      | BICAAC (5)           | HBpin (2.5)        | Ether       | 60        | 16        | NR            |
| 5      | BICAAC (5)           | HBpin (2.5)        | DCM         | 60        | 16        | NR            |
| 6      | BICAAC (5)           | HBpin (2.5)        | Hexane      | 60        | 16        | NR            |
| 7      | <b>BICAAC (5)</b>    | <b>HBpin (2.5)</b> | <b>neat</b> | <b>60</b> | <b>16</b> | <b>91</b>     |
| 8      | -                    | HBpin (2.5)        | neat        | 60        | 16        | NR            |
| 9      | BICAAC (5)           | HBpin (2.0)        | neat        | 60        | 16        | 73            |
| 10     | BICAAC (5)           | HBpin (2.5)        | neat        | RT        | 16        | 43            |
| 11     | BICAAC (5)           | HBpin (2.5)        | neat        | 60        | 24        | 92            |
| 12     | BICAAC(10)           | HBpin (2.5)        | neat        | 60        | 16        | 90            |
| 13     | BICAAC (5)           | HBpin (2.5)        | neat        | 80        | 16        | 92            |
| 14     | PPh <sub>3</sub> (5) | HBpin (2.5)        | neat        | 60        | 16        | NR            |

|    |                       |                                       |      |    |    |    |
|----|-----------------------|---------------------------------------|------|----|----|----|
| 15 | Et <sub>3</sub> N (5) | HBpin (2.5)                           | neat | 60 | 16 | NR |
| 16 | DBU (5)               | HBpin (2.5)                           | neat | 60 | 16 | NR |
| 17 | Pyridine (5)          | HBpin (2.5)                           | neat | 60 | 16 | NR |
| 18 | BICAAC (5)            | 9-BBN (2.5)                           | neat | 60 | 16 | NR |
| 19 | BICAAC (5)            | NH <sub>3</sub> BH <sub>3</sub> (2.5) | neat | 60 | 16 | NR |

Reaction conditions: 2a (0.2 mmol), borane (0.5 mmol), dry solvent (0.5 mL), NMR yields were based on unreacted substrate 2a, NR: no reaction.

## 2.2) General experimental procedure for BICAAC catalyzed hydroboration of nitriles

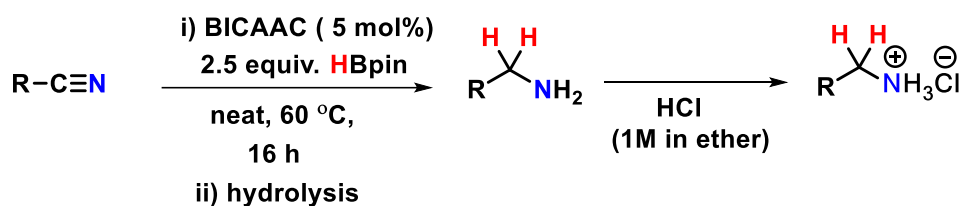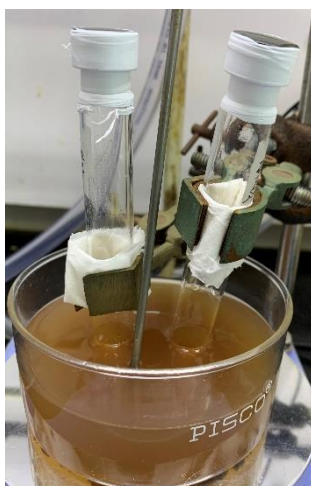

**Scheme S1.** General procedure for the hydroboration of nitriles to amine hydrochloride salts

Inside a nitrogen-filled glovebox, an oven-dried 15 mL reaction tube was charged with 0.2 mmol nitrile substrate and a magnetic stirring bar, followed by addition of BICAAC (5

mol%) and HBpin (0.5 mmol). Nitrile substrates were kept under high vacuum for 1 h prior to use. The reaction mixture was stirred vigorously at room temperature for 1-2 min. After that, the tube was sealed tightly with a screw cap and removed from the glovebox. The reaction tube was placed in a preheated oil bath at 60 °C and stirred for 16 h. After 16 h, the reaction mixture was cooled to room temperature and quenched by the addition of methanol (1 mL) and stirred overnight for hydrolysis. Subsequently, 0.5 mL HCl (1M in ether) was added dropwise into the reaction tube, and precipitation was observed. The precipitate was washed with n-hexane and diethyl ether and dried under the vacuum. The product was characterized by  $^1\text{H}$  and  $^{13}\text{C}\{^1\text{H}\}$  NMR spectroscopy using  $\text{D}_2\text{O}$  or  $\text{DMSO-d}_6$  as the solvent.

### 2.3) Experimental procedure for gram-scale reaction

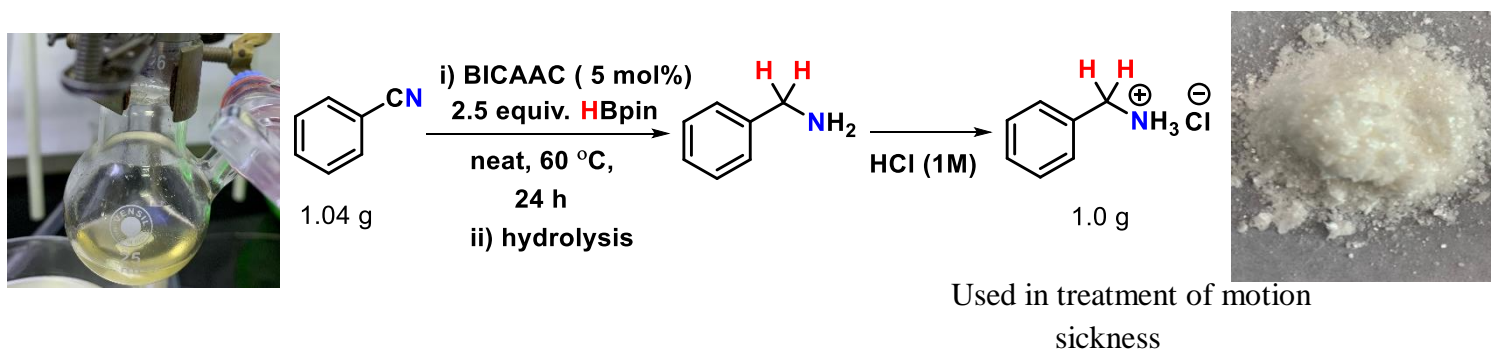

**Scheme S2.** Catalytic hydroboration of benzonitrile to benzylamine hydrochloride in gram-scale.

Inside a nitrogen-filled glovebox, BICAAC (5 mol%) and pinacolborane (2.5 equiv.) were added to an oven-dried 25 mL Schlenk flask. The solution was stirred vigorously at room temperature for 5 min. While continuously stirring, 1.04 g of benzonitrile substrate was added to the solution using a micropipette. After that, the flask was closed and removed from the glovebox. The reaction flask was placed in a preheated oil bath at 60 °C and stirred for 24 h. After 24 h, the reaction mixture was cooled to room temperature and quenched by the addition of methanol and stirred overnight for hydrolysis. Next, HCl (1M in ether) was added dropwise

into the reaction flask, and precipitation was observed. The precipitate was washed with n-hexane and diethyl ether and dried under the vacuum. The product was characterized by  $^1\text{H}$  and  $^{13}\text{C}\{^1\text{H}\}$  NMR spectroscopy using  $\text{DMSO-d}_6$  as the solvent. Yield of the product is 70%.

#### 2.4) Conversion vs time plot

We monitored the progress of the hydroboration reaction by looking at the conversion vs. time graph for 4-bromobenzonitrile substrate with catalyst BICAAC as shown in Fig. S1. The reaction was carried out at 60 °C for 16 h with 4-bromobenzonitrile and pinacolborane in presence of 5 mol% catalyst loading. The yield of the product was 30% after 2 h, and within 6 h, it furnishes a satisfactory yield of 84%. Finally, within 8 h, the reaction reaches near completion resulting in 91% conversion (Fig. S1).

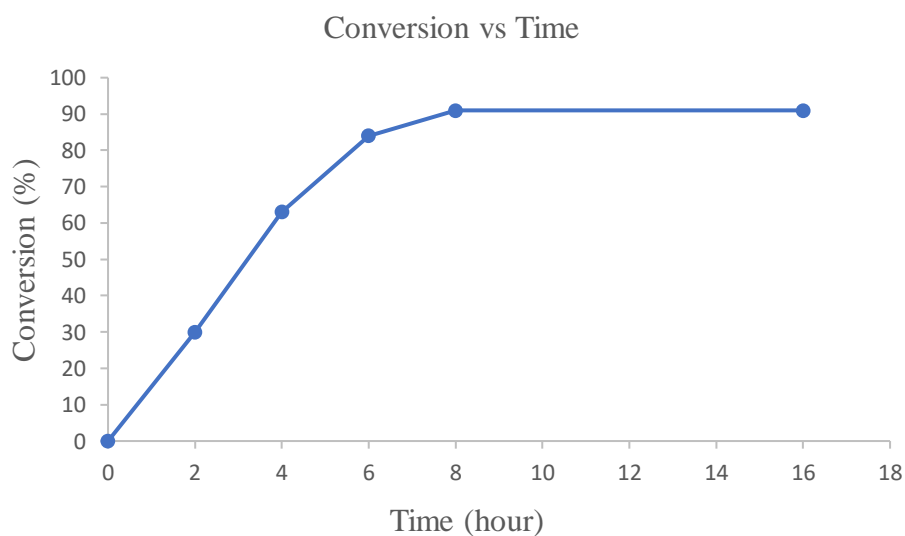

**Fig. S1** Plot of conversion (%) versus time (hour) during the hydroboration of 4-bromobenzonitrile (0.2 mmol) and pinacolborane (0.5 mmol) catalyzed by BICAAC (5 mol %).

#### 2.5) Control reactions

##### a) Preparation and Characterization of the BICAAC B-H insertion product

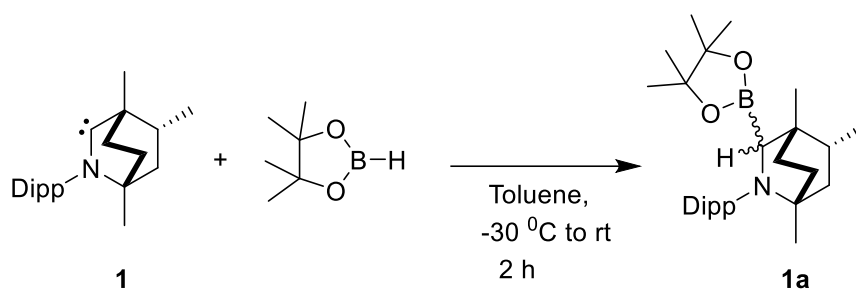

**Scheme S3.** Stoichiometric reaction of BICAAC (**1**) and HBpin resulting in the formation of BICAAC(H)·Bpin (**1a**)

Inside the glovebox, a 25 mL oven dried Schlenk flask was charged with BICAAC (0.16 mmol) and was dissolved in 1.5 mL of toluene and was cooled to -30 °C. To it, HBpin (1equiv.) was added and the reaction mixture was allowed to warm to RT and stirred for 2 h. Volatiles were then removed by evaporation under vacuum, affording a colourless and sticky compound. The diastereomeric mixture of the title compound (**1a**) was obtained in 81% yield.  $^1\text{H}$ ,  $^{13}\text{C}\{^1\text{H}\}$  and  $^{11}\text{B}$  NMR spectra were recorded in benzene- $d_6$  solvent.

$^1\text{H}$  NMR (400 MHz,  $\text{C}_6\text{D}_6$ , 25 °C), Diastereomeric Mixture:  $\delta$  (ppm) = 7.07-7.01 (m, 4H), 6.98-6.93 (m, 2H), 4.11-4.00 (sept,  $J = 6.8$  Hz, 1H), 3.97-3.86 (sept,  $J = 6.8$  Hz, 1H), 3.65 (s, 1H, CHB), 3.54 (s, 1H, CHB), 3.52-3.44 (overlapping signal from diastereomers, 2H), 2.49-2.41 (m, 1H), 2.25-2.18 (m, 1H), 2.13-2.07 (m, 1H), 1.87-1.82 (m, 1H), 1.79-1.60 (m, 6H), 1.59-1.53 (m, 3H), 1.51-1.48 (m, 6H), 1.47 (s, 3H), 1.42 (broad d, 3H), 1.38 (broad d, 3H), 1.30-1.26 (m, 8H), 1.17-1.11 (m, 8H), 1.00 (broad d, 3H), 0.96 (s, 3H), 0.85 (s, 3H), 0.79 (s, 3H), 0.74-0.73 (m, 6H), 0.70 (s, 6H), 0.67 (s, 6H), 0.63 (s, 6H);  $^{13}\text{C}\{^1\text{H}\}$  NMR (125 MHz,  $\text{C}_6\text{D}_6$ , 25 °C):  $\delta = 152.1, 152.0, 151.5, 150.2, 144.6, 144.3, 129.3, 128.6, 126.3, 126.1, 124.6, 124.3, 124.1, 82.9, 82.8, 52.9, 52.6, 47.9, 44.8, 41.1, 37.9, 37.5, 37.1, 36.5, 35.8, 35.3, 34.5, 29.7, 29.7, 28.0, 27.7, 26.1, 26.0, 25.8, 25.6, 25.3, 25.0, 24.7, 24.4, 24.3, 24.23, 24.17, 23.98,$



23.0, 20.0, 15.7;  $^{11}\text{B}\{^1\text{H}\}$  NMR (128 MHz,  $\text{C}_6\text{D}_6$ , 25 °C):  $\delta = 32.0$  (broad). HRMS:  $m/z$  calc. for  $\text{C}_{28}\text{H}_{47}\text{BNO}_2$   $[\text{M}+\text{H}]^+$ : 440.3694, found : 440.3679

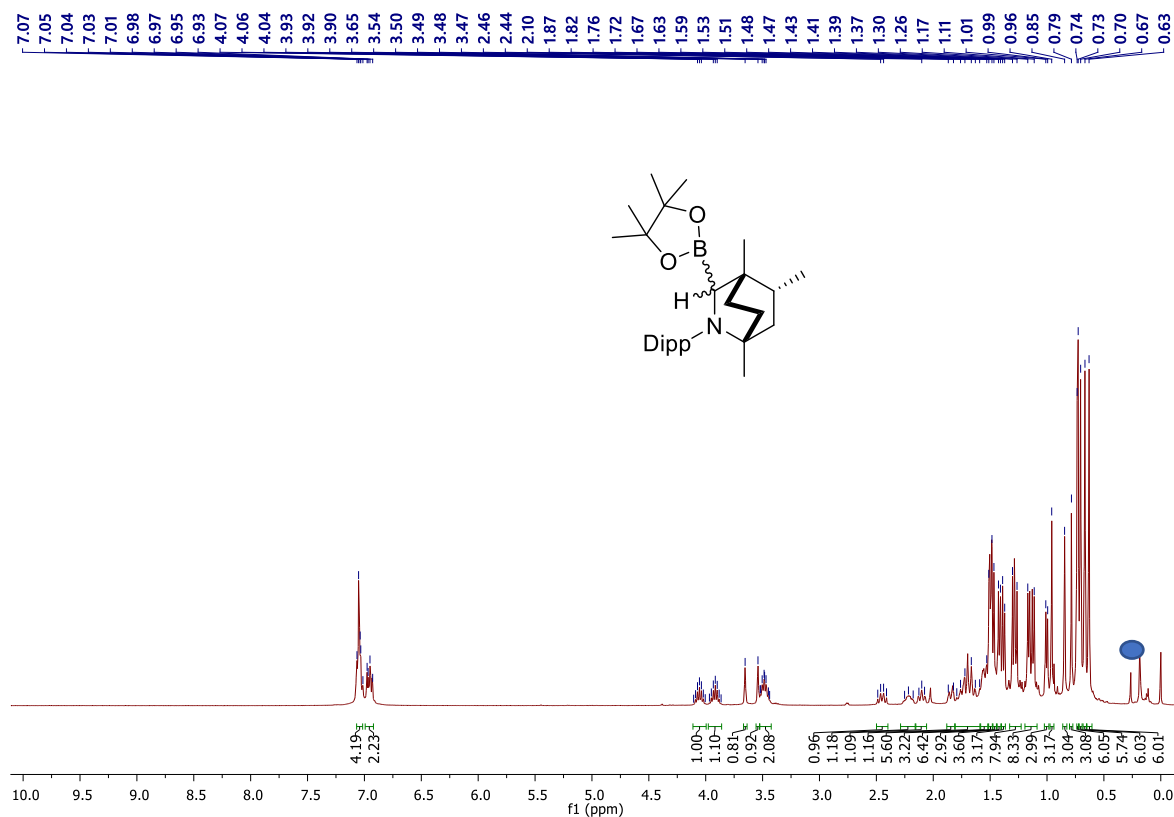

**Fig. S2**  $^1\text{H}$  NMR spectrum of diastereomeric mixture of BICAAC(H)·Bpin (**1a**) in  $\text{C}_6\text{D}_6$ .

● denotes impurity peak.

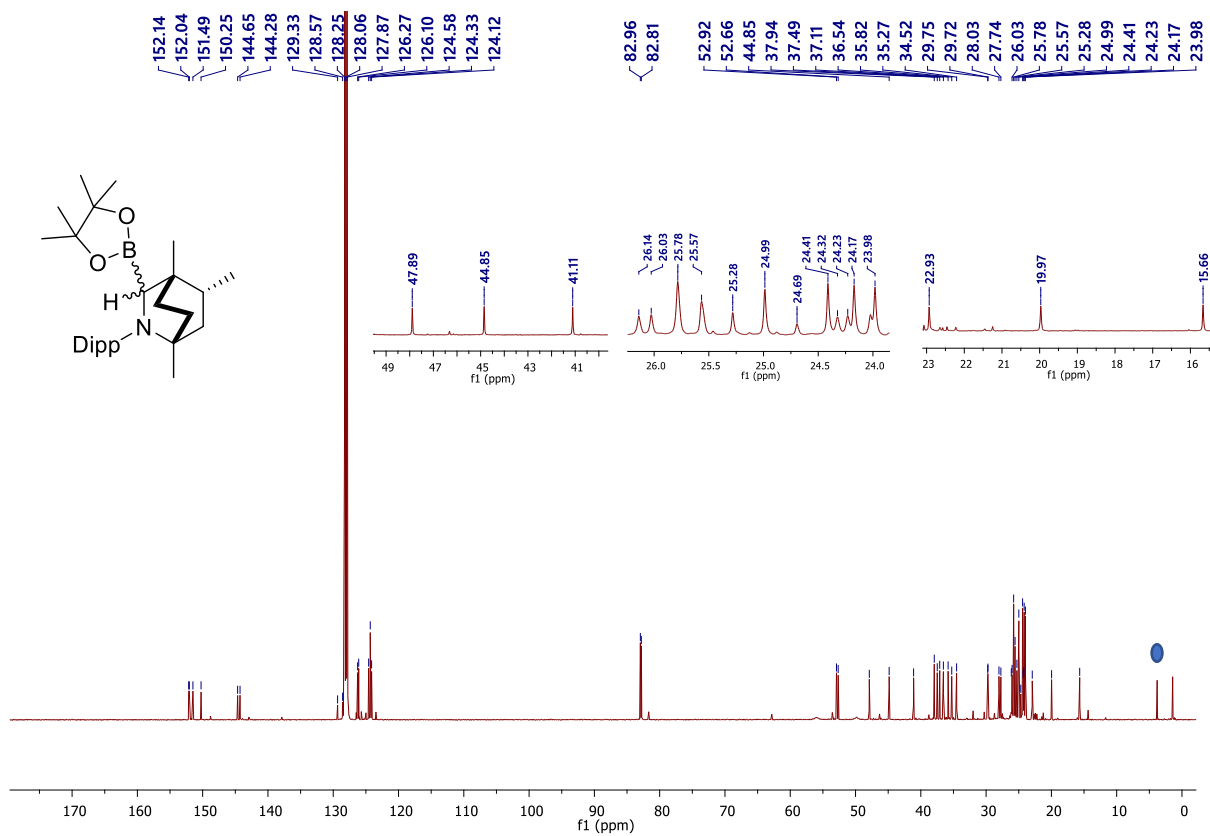

**Fig. S3**  $^{13}\text{C}\{^1\text{H}\}$  NMR spectrum of BICAAC(H)·Bpin (**1a**) in  $\text{C}_6\text{D}_6$ . ● denotes impurity peak.

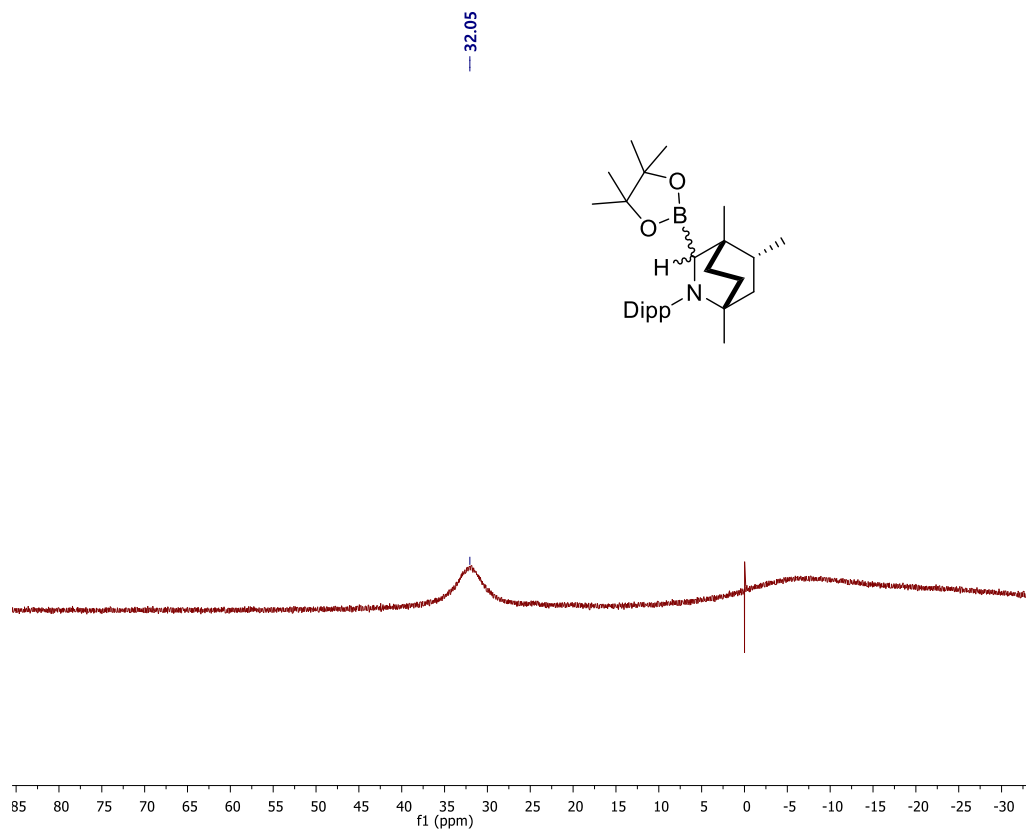

**Fig. S4**  $^{11}\text{B}\{^1\text{H}\}$  NMR spectrum of BICAAC(H)·Bpin (**1a**) in  $\text{C}_6\text{D}_6$

$C_{28}H_{47}BNO_2[M+H]^+$ :calculated 440.3694, found 440.3679

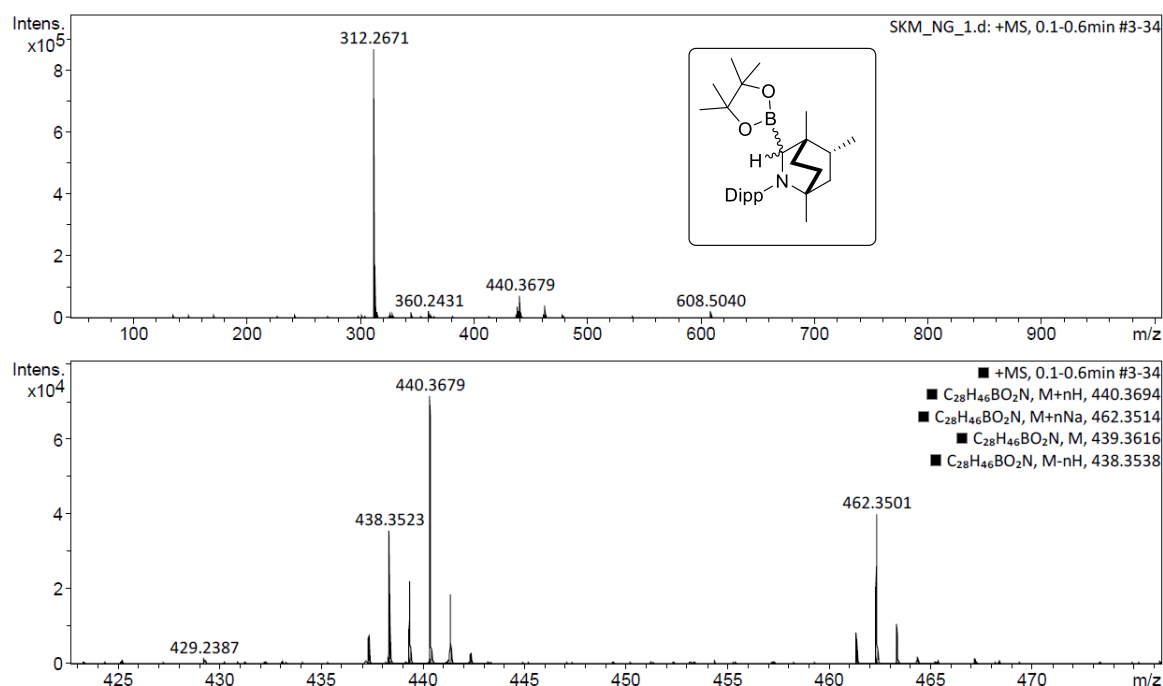

**Fig. S5** HRMS spectrum of BICAAC(H)·Bpin (**1a**)

**b) A control reaction between 1a, 4-bromo benzonitrile and HBpin**

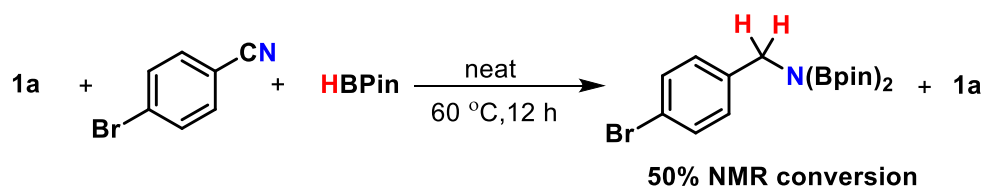

**Scheme S4.** Stoichiometric reaction of BICAAC(H)·Bpin (**1a**), 4-bromo benzonitrile and HBpin under neat condition

Inside an argon filled glovebox, a 25 mL Schlenk flask containing **1a** (0.16 mmol) was charged with 4-bromo benzonitrile (0.16 mmol) and HBpin (0.16 mmol). The Schlenk flask was next removed from the glovebox and was placed in a preheated oil bath at 60 °C and stirred for 12 h. After 12 h, the reaction mixture was cooled to room temperature and taken inside the glovebox. The reaction mixture was analysed by <sup>1</sup>H and <sup>11</sup>B{<sup>1</sup>H} NMR spectroscopy using C<sub>6</sub>D<sub>6</sub> solvent as a solvent.

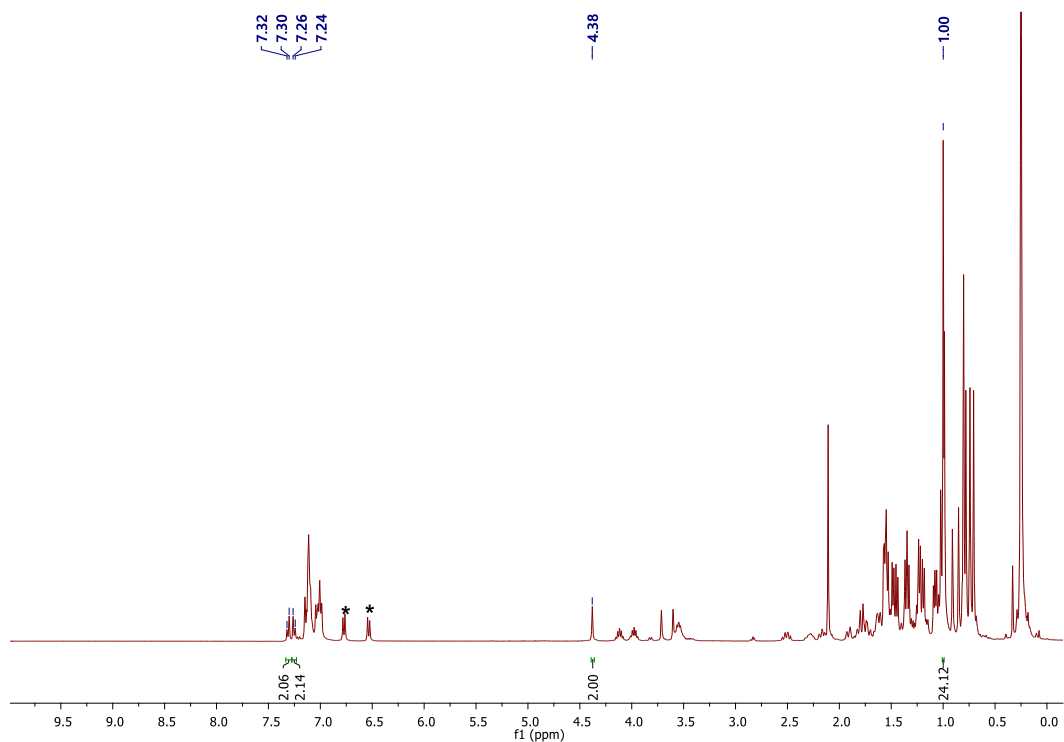

**Fig. S6**  $^1\text{H}$  NMR spectrum of reaction mixture in  $\text{C}_6\text{D}_6$ . \* indicates peak arising from unreacted 4-bromo benzonitrile.<sup>S6</sup>

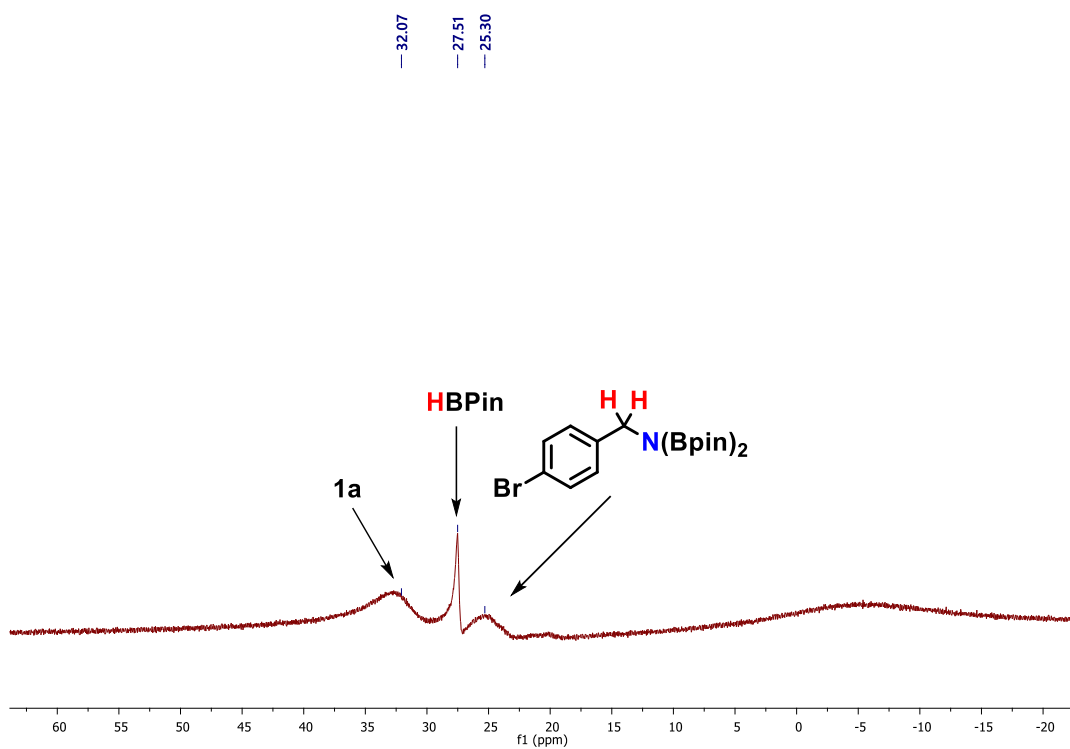

**Fig. S7**  $^{11}\text{B}\{^1\text{H}\}$  NMR spectrum of reaction mixture in  $\text{C}_6\text{D}_6$ .

c) BICAAC(H)·Bpin (**1a**) catalysed hydroboration of nitrile: As a proof to establish that **1a** is the catalytically active species

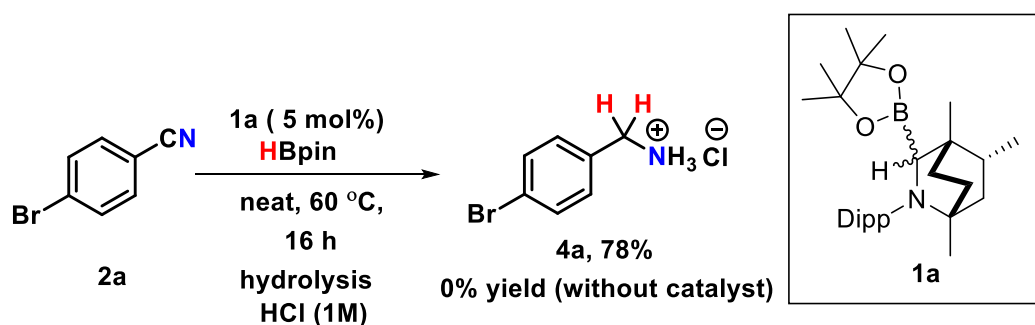

*Scheme S5.* Hydroboration of nitrile catalysed by BICAAC(H)·Bpin (**1a**)

4-bromo benzonitrile, **2a** was kept under vacuum for 1 h and then taken inside glove box. Inside an argon filled glovebox, an oven dried 15 mL reaction tube equipped with a magnetic bar was charged with 5 mol% of BICAAC(H)·Bpin (**1a**), 4-bromo benzonitrile (0.2 mmol) and HBpin (0.5 mmol). The tube was next sealed tightly with a screw cap and removed from the glovebox. The reaction tube was placed in a preheated oil bath at 60 °C and stirred for 16 h. After 16 h, the reaction mixture was cooled to room temperature and quenched by the addition of methanol (1 mL) and stirred overnight for hydrolysis. Next, 0.5 mL HCl (1M in ether) was added dropwise into the reaction tube, and precipitation was observed. The precipitate was washed with n-hexane and diethyl ether and dried under the vacuum. The corresponding product was then characterized by  $^1\text{H}$  and  $^{13}\text{C}\{^1\text{H}\}$  NMR spectroscopy using  $\text{D}_2\text{O}$  as the solvent. Yield of the product is 78%.

$^1\text{H}$  NMR (400 MHz,  $\text{D}_2\text{O}$ , 25 °C)<sup>S7</sup>:  $\delta$  = 7.63 (d,  $J$  = 8.4 Hz, 2H), 7.36 (d,  $J$  = 8.4 Hz, 2H), 4.16 (s, 2H);  $^{13}\text{C}\{^1\text{H}\}$  NMR (125 MHz,  $\text{D}_2\text{O}$ , 25 °C):  $\delta$  = 132.2, 131.7, 130.7, 122.7, 42.5.

## 2.6) Isotope experiment using DBpin

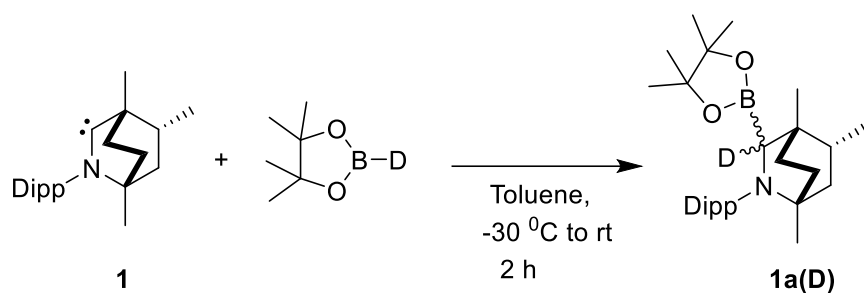

**Scheme S6.** Stoichiometric reaction of BICAAC (**1**) and DBpin resulting in the formation of BICAAC(D)·Bpin [**1a(D)**]

Inside the glovebox, a 25 mL oven dried Schlenk flask was charged with BICAAC (0.16mmol) and was dissolved in 1.5 mL of toluene and was cooled to -30 °C. To it, DBpin (1equiv.) was added and the reaction mixture was allowed to warm to RT and stirred for 2 h. Volatiles were then removed by evaporation under vacuum, affording a colourless and sticky compound. The diastereomeric mixture of the title compound **1a(D)** was obtained. In the  $^1\text{H}$  NMR spectrum, the two singlets characteristic signals of the addition product (-CH) at  $\delta$  3.65 and 3.54 ppm were missing. Further, a broad singlet at 32.9 ppm is obtained in  $^{11}\text{B}\{^1\text{H}\}$  NMR spectrum (See Supporting Information, Fig. S8) confirms the formation of the addition product **1a(D)**. These findings suggest the incorporation of deuterium and confirms that the hydride present in the addition product **1a** originates from pinacolborane.

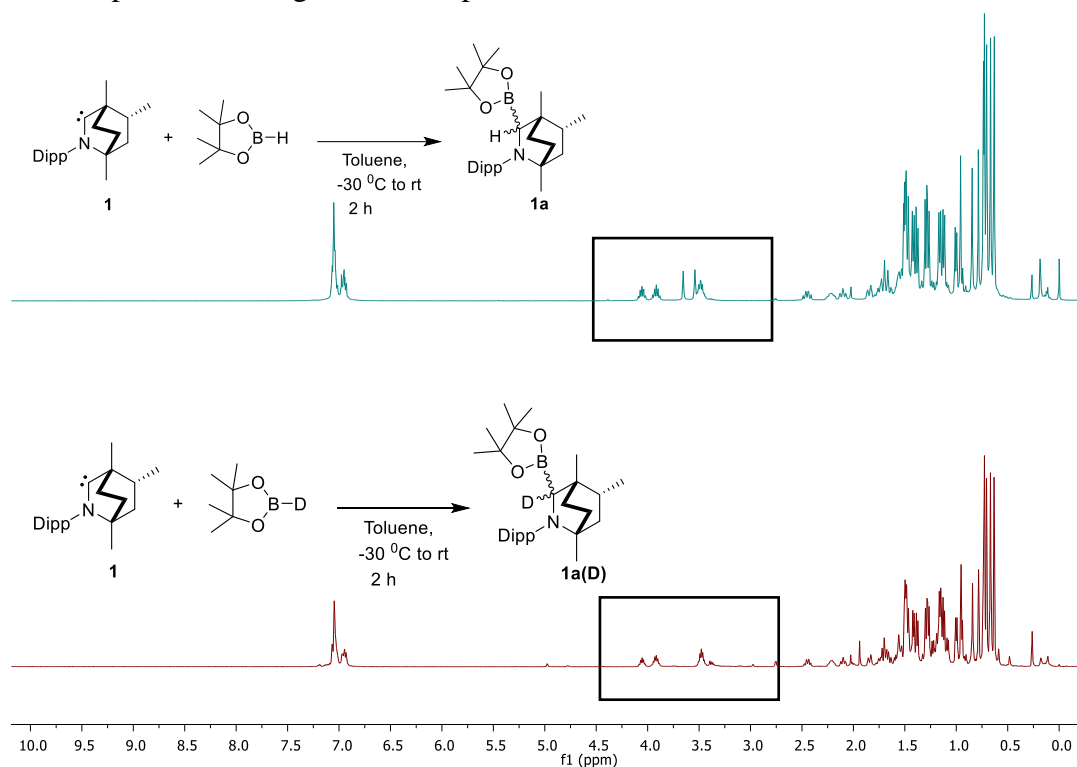

**Fig. S8** Stack plots of  $^1\text{H}$  NMR spectra (in  $\text{C}_6\text{D}_6$ ) revealing incorporation of deuterated form

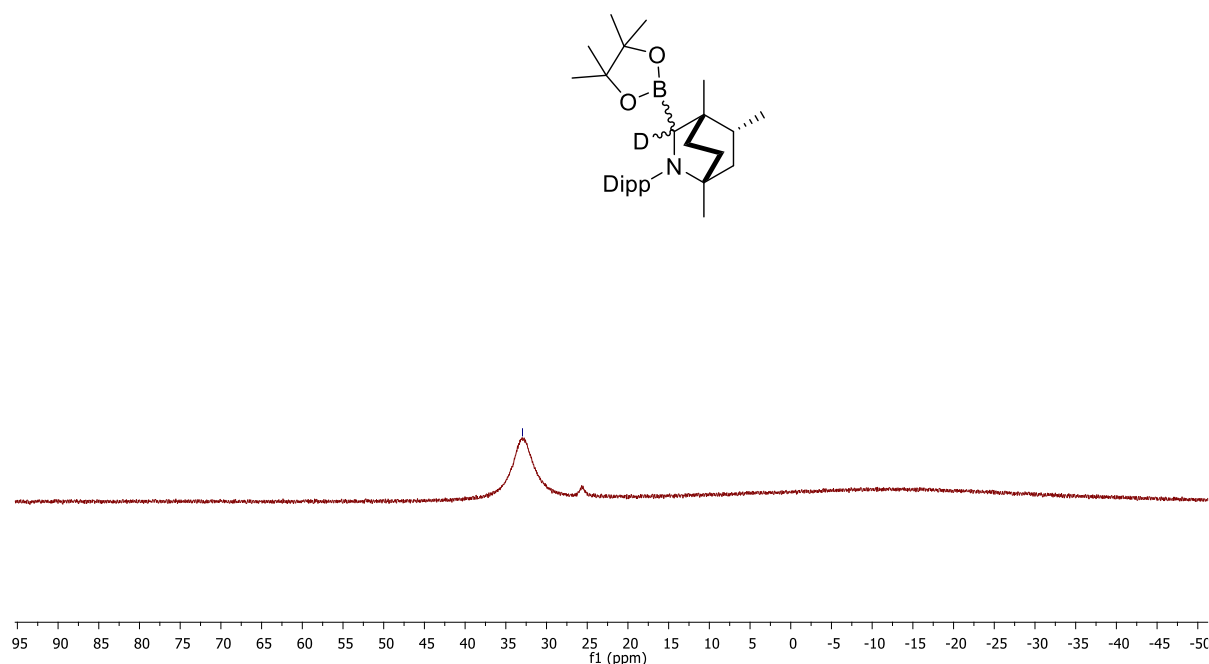

**Fig. S9**  $^{11}\text{B}\{^1\text{H}\}$  NMR spectrum of BICAAC(D)-Bpin (**1b**) in  $\text{C}_6\text{D}_6$

### 2.7) Procedure for testing longevity of the catalyst

Inside an argon filled glovebox, four oven dried 15 mL reaction tubes equipped with magnetic bar were taken and 0.2 mmol of benzonitrile, BICAAC catalyst (5 mol %), HBpin (0.5 mmol) were added in each of them. Next, the tubes were sealed tightly and removed from the glove box. Following this, it was placed in a preheated oil bath at 60 °C and stirred for 16 h.

After the first reaction time span (16 h), the first reaction tube was uncapped and its conversion was analysed by  $^1\text{H}$  NMR spectroscopy. The rest 3 tubes were transferred to the glovebox and fresh 0.2 mmol of benzonitrile, HBpin (0.5 mmol) were added to all remaining three reaction tubes. No further addition of catalyst was made to any of these tubes. Next, these tubes were placed in a preheated oil bath at 60 °C and stirred for 16 h for the second cycle. After 16 h, the 2nd reaction tube was discontinued and analysed. This was continued till the fourth cycle and

its conversion was calculated similarly. It may be noted that the conversion is reported based on the average of two reactions.

In the first two runs, complete consumption of substrate to diborylated product was observed from the reaction mixture  $^1\text{H}$  NMR spectrum. 77% and 72% of dihydroborylated product were obtained in the third and fourth cycle, respectively. This observation demonstrates the living nature of the catalyst.

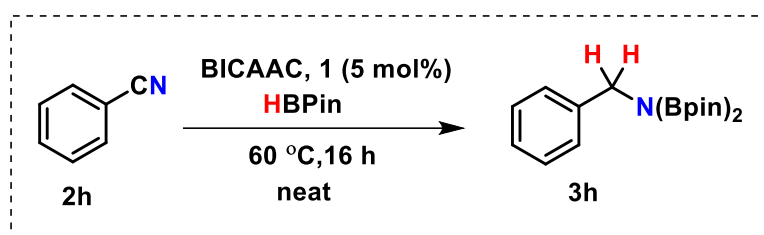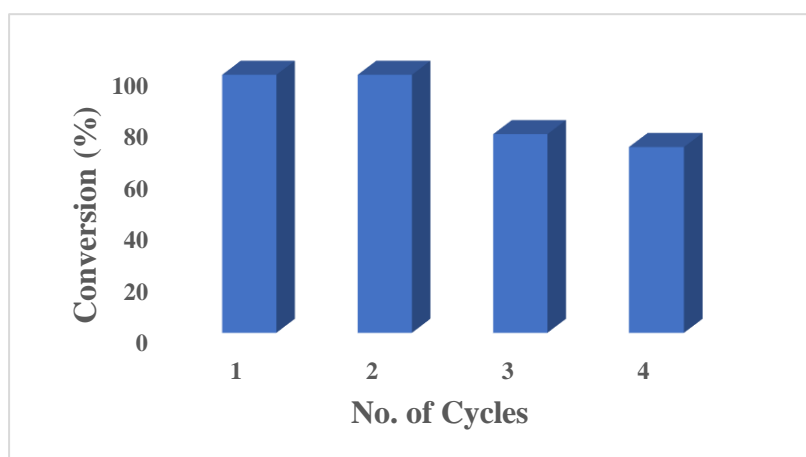

*Fig. S10* Plot of conversion (%) versus no. of cycles in the diborylation of benzonitrile for the catalyst longevity test.

## 2.8) Procedure for isolation of N,N-diborylamine

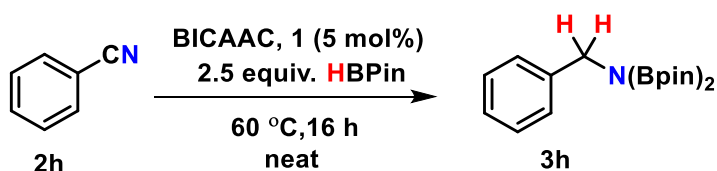

*Scheme S7.* Synthesis of double hydroborated product (**3h**)



Inside a nitrogen-filled glovebox, BICAAC (5 mol%) and pinacolborane (1.25 mmol) were added to an oven-dried 25 mL Schlenk flask. The solution was stirred vigorously at room temperature for 2 min. To it, benzonitrile, **2h** (0.5 mmol) was added using a micropipette. After that, the flask was closed and removed from the glovebox. The reaction flask was placed in a preheated oil bath at 60 °C and stirred for 16 h. After 16 h, the reaction mixture was cooled to room temperature and taken inside the glovebox. White solid was observed in the flask, 0.5 mL of dry hexane was added to it and it was stored in the glovebox freezer at -30 °C for 30 minutes. Hexane was decanted from the solid after the Schlenk flask was retrieved from the freezer. The purified solid, **3h** was then kept under vacuum to remove any residual solvent. It was then characterised by  $^1\text{H}$ ,  $^{13}\text{C}\{^1\text{H}\}$  and  $^{11}\text{B}\{^1\text{H}\}$  NMR spectroscopy using  $\text{CDCl}_3$  as solvent.

$^1\text{H}$  NMR (400 MHz,  $\text{CDCl}_3$ , 25 °C):  $\delta$  = 7.28-7.26 (m, 2H), 7.20 (t,  $J$  = 7.6 Hz, 2H), 7.13-7.10 (m, 1H), 4.20 (s, 2H), 1.16 (s, 24H);  $^{13}\text{C}\{^1\text{H}\}$  NMR (100 MHz,  $\text{CDCl}_3$ , 25 °C):  $\delta$  = 143.1, 127.9, 127.6, 126.2, 82.4, 47.3, 24.6;  $^{11}\text{B}\{^1\text{H}\}$  NMR (128 MHz,  $\text{CDCl}_3$ , 25 °C):  $\delta$  = 25.2.

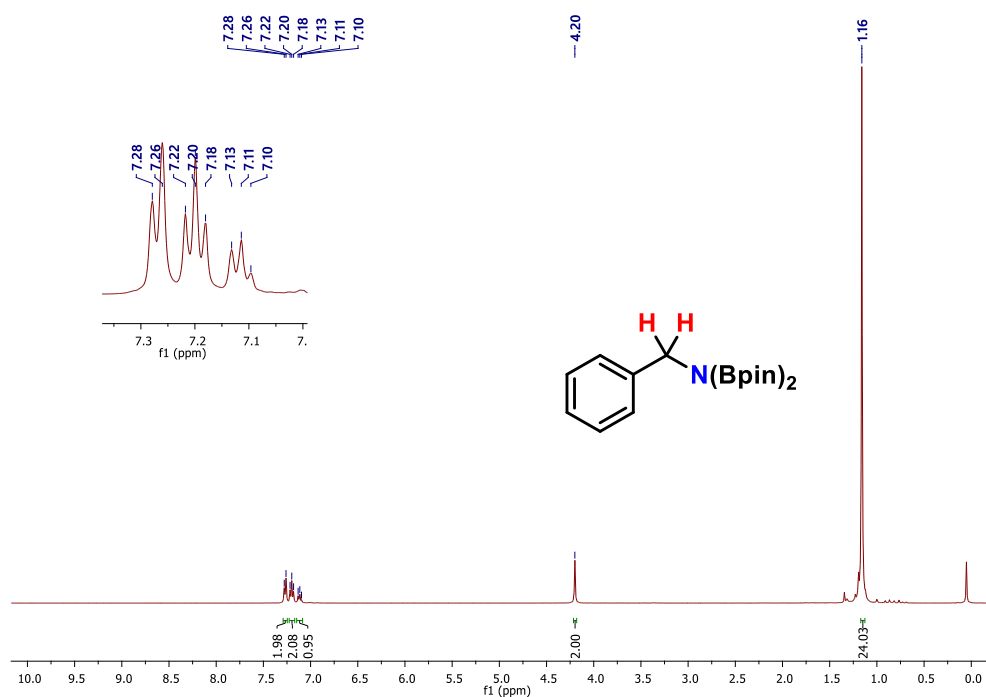

**Fig. S11**  $^1\text{H}$  NMR spectrum of **3h** in  $\text{CDCl}_3$ .<sup>S7</sup>

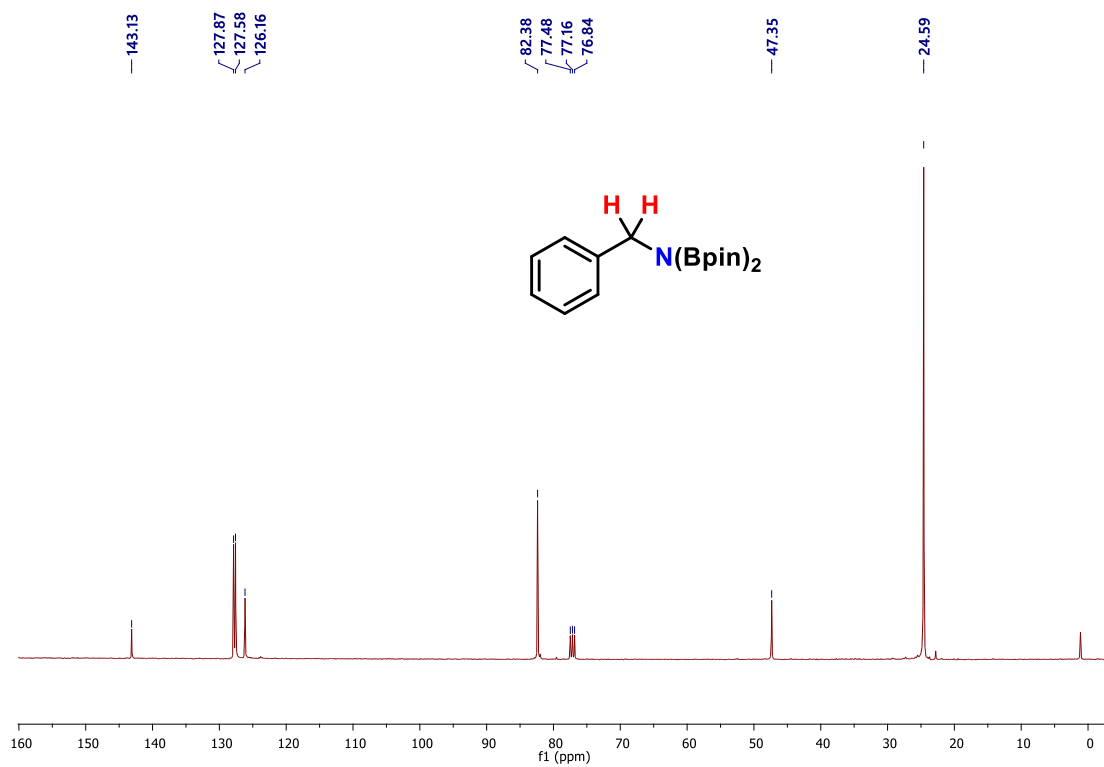

**Fig. S12**  $^{13}\text{C}\{^1\text{H}\}$  NMR spectrum of **3h** in  $\text{CDCl}_3$ .<sup>S7</sup>

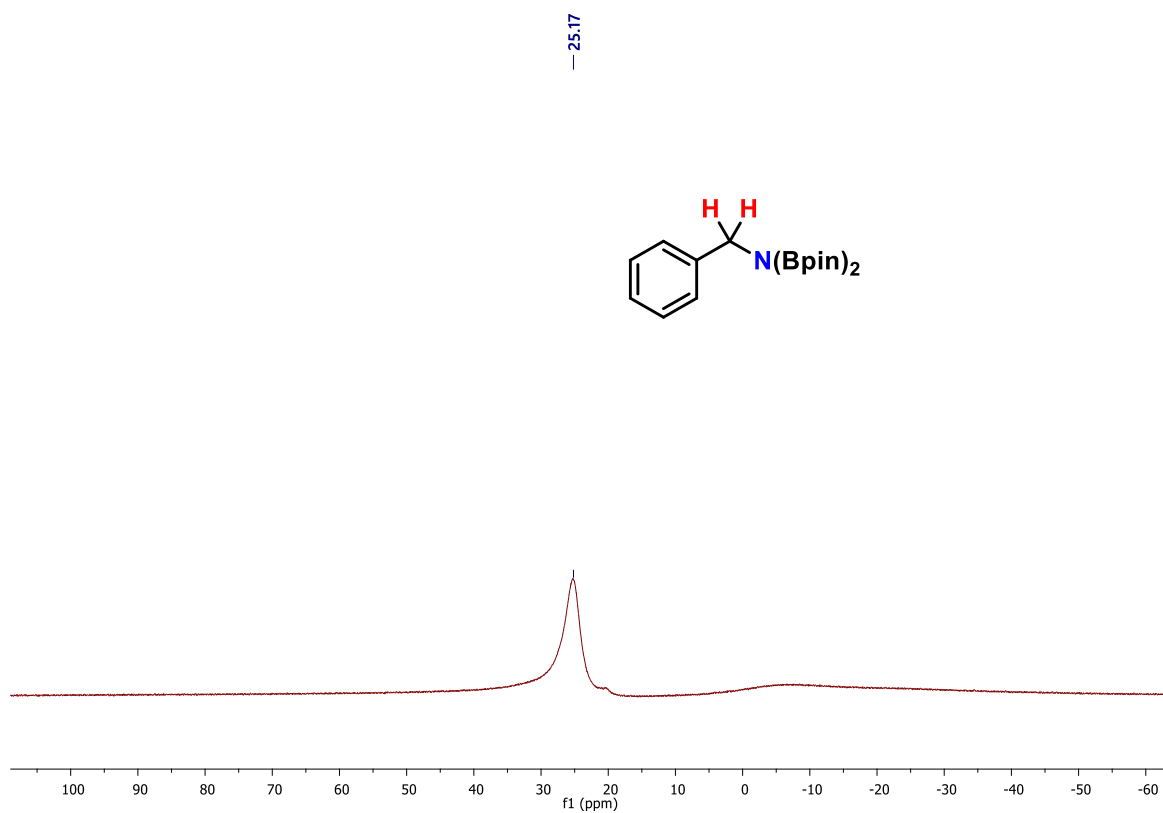

**Fig. S13**  $^{11}\text{B}\{^1\text{H}\}$  NMR spectrum of **3h** in  $\text{CDCl}_3$ .<sup>S7</sup>

## 2.9) Procedure for synthesis of amides from N,N-diborylamines

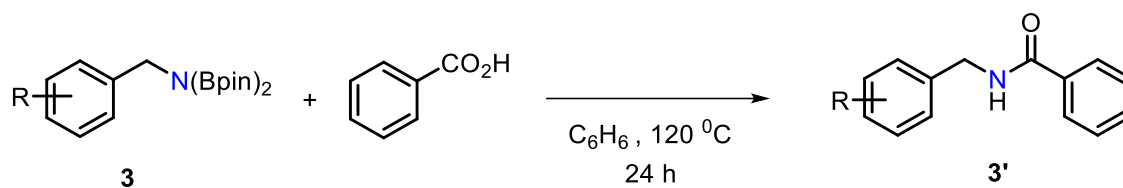

### *Scheme S8.* Synthesis of N-substituted amides by direct C-N cross coupling.

Inside a nitrogen-filled glovebox, 0.5 mmol of N,N-diborylamine, **3** obtained from our protocol in 0.3 mL benzene was taken in a sealed tube. To it, 0.5 mmol of benzoic acid in 0.2 mL benzene was added. Next the tube was sealed tightly with a screw cap and removed from the glovebox. The sealed tube was placed in a preheated oil bath at  $120\text{ }^\circ\text{C}$  and stirred for 24 h. After 24 h, the reaction mixture was cooled to room temperature and solvent was removed under reduced pressure. The crude product was purified by column chromatography using hexane/ethyl acetate mixture to yield the desired products.

## 3) Characterization

### 3.1) $^1\text{H}$ , $^{13}\text{C}\{^1\text{H}\}$ and $^{19}\text{F}$ NMR Data of Isolated Products

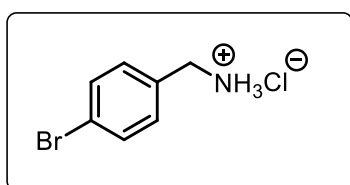

(4-bromophenyl)methan ammonium chloride (**4a**)<sup>S8</sup>:  $^1\text{H}$  NMR (400 MHz,  $\text{D}_2\text{O}$ ,  $25\text{ }^\circ\text{C}$ ):  $\delta = 7.63$  (d,  $J = 8.4$  Hz, 2H),  $7.36$  (d,  $J = 8.4$  Hz, 2H),  $4.16$  (s, 2H);  $^{13}\text{C}\{^1\text{H}\}$  NMR (125 MHz,  $\text{D}_2\text{O}$ ,  $25\text{ }^\circ\text{C}$ ):  $\delta = 132.2$ ,  $131.7$ ,  $130.7$ ,  $122.7$ ,  $42.5$ . Yield: 76%.

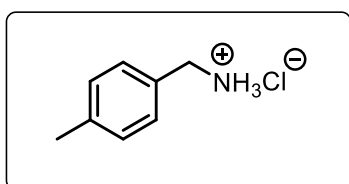

p-tolylmethan ammonium chloride (**4b**)<sup>S9</sup>: **<sup>1</sup>H NMR** (400 MHz, D<sub>2</sub>O, 25 °C): δ = 7.36-7.30 (m, 4H), 4.14 (s, 2H), 2.35 (s, 3H); **<sup>13</sup>C{<sup>1</sup>H} NMR** (100 MHz, D<sub>2</sub>O, 25 °C): δ = 139.6, 129.8, 129.6, 128.9, 42.9, 20.3. Yield: 86%.

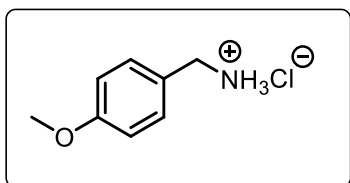

(4-methoxyphenyl)methan ammonium chloride (**4c**)<sup>S9</sup>: **<sup>1</sup>H NMR** (400 MHz, D<sub>2</sub>O, 25 °C): δ = 7.41 (d, *J* = 8.8 Hz, 2H), 7.04 (d, *J* = 8.4 Hz, 2H), 4.12 (s, 2H), 3.83 (s, 3H); **<sup>13</sup>C{<sup>1</sup>H} NMR** (100 MHz, D<sub>2</sub>O, 25 °C): δ = 159.4, 130.6, 125.2, 114.6, 55.4, 42.6. Yield: 86%.

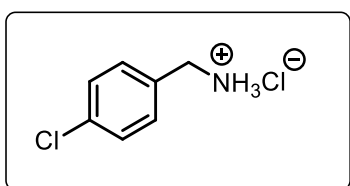

(4-chlorophenyl)methan ammonium chloride (**4d**)<sup>S10</sup>: **<sup>1</sup>H NMR** (400 MHz, D<sub>2</sub>O, 25 °C): δ = 7.48-7.41 (m, 4H), 4.17 (s, 2H); **<sup>13</sup>C{<sup>1</sup>H} NMR** (100 MHz, D<sub>2</sub>O, 25 °C): δ = 134.6, 131.2, 130.5, 129.2, 42.5. Yield: 86%.

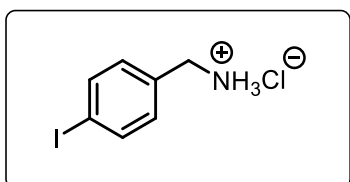

(4-iodophenyl)methan ammonium chloride (**4e**)<sup>S8</sup>:  $^1\text{H NMR}$  (400 MHz,  $\text{D}_2\text{O}$ , 25 °C):  $\delta = 7.83$  (d,  $J = 8.0$  Hz, 2H), 7.22 (d,  $J = 8.4$  Hz, 2H), 4.14 (s, 2H);  $^{13}\text{C}\{^1\text{H}\}$  NMR (100 MHz,  $\text{D}_2\text{O}$ , 25 °C):  $\delta = 138.3, 132.3, 130.8, 94.7, 42.7$ . Yield: 59%.

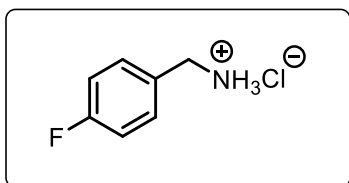

(4-fluorophenyl)methan ammonium chloride (**4f**)<sup>S11</sup>:  $^1\text{H NMR}$  (400 MHz,  $\text{D}_2\text{O}$ , 25 °C):  $\delta = 7.47$  (dd,  $J = 8.4, 5.2$  Hz, 2H), 7.20 (t,  $J = 8.8$  Hz, 2H), 4.18 (s, 2H);  $^{13}\text{C}\{^1\text{H}\}$  NMR (125 MHz,  $\text{D}_2\text{O}$ , 25 °C):  $\delta = 162.9$  (d,  $J = 243.9$  Hz), 131.1 (d,  $J = 8.9$  Hz), 128.6 (d,  $J = 2.5$  Hz), 116.0 (d,  $J = 21.4$  Hz), 42.5;  $^{19}\text{F}\{^1\text{H}\}$  NMR (470 MHz,  $\text{D}_2\text{O}$ , 25 °C):  $\delta = -113.18$ . Yield: 80%.

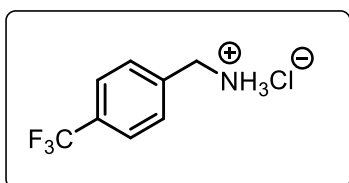

(4-(trifluoromethyl)phenyl)methan ammonium chloride (**4g**)<sup>S10</sup>:  $^1\text{H NMR}$  (400 MHz,  $\text{D}_2\text{O}$ , 25 °C):  $\delta = 7.79$  (d,  $J = 8.0$  Hz, 2H), 7.62 (d,  $J = 8.0$  Hz, 2H), 4.28 (s, 2H);  $^{13}\text{C}\{^1\text{H}\}$  NMR (125 MHz,  $\text{D}_2\text{O}$ , 25 °C):  $\delta = 136.6, 130.4$  (q,  $J = 32.0$  Hz), 129.3, 126.1 (q,  $J = 3.8$  Hz), 125.1, 122.9, 120.7, 42.6;  $^{19}\text{F}\{^1\text{H}\}$  NMR (470 MHz,  $\text{D}_2\text{O}$ , 25 °C, TMS):  $\delta = -62.5$ . Yield: 70%.

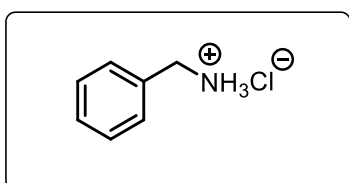

Phenylmethan ammonium chloride (**4h**)<sup>S10</sup>: <sup>1</sup>H NMR (400 MHz, D<sub>2</sub>O, 25 °C): δ = 7.51 (s, 5H), 4.21 (s, 2H); <sup>13</sup>C{<sup>1</sup>H} NMR (125 MHz, D<sub>2</sub>O, 25 °C): δ = 132.6, 129.3, 128.9, 43.2. Yield: 84%.

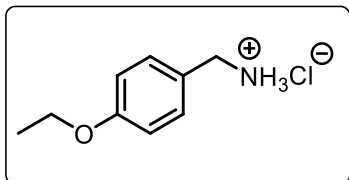

(4-ethoxyphenyl)methan ammonium chloride (**4i**)<sup>S12</sup>: <sup>1</sup>H NMR (400 MHz, DMSO-d<sub>6</sub>, 25 °C): δ = 8.50 (br s, 3H), 7.42 (d, *J* = 8.4 Hz, 2H), 6.93 (d, *J* = 8.4 Hz, 2H), 4.01 (q, *J* = 7.2 Hz, 2H), 3.90 (s, 2H), 1.31 (t, *J* = 7.2 Hz, 3H); <sup>13</sup>C{<sup>1</sup>H} NMR (100 MHz, DMSO-d<sub>6</sub>, 25 °C): δ = 158.6, 130.5, 125.9, 114.3, 63.1, 41.6, 14.6. Yield: 67%.

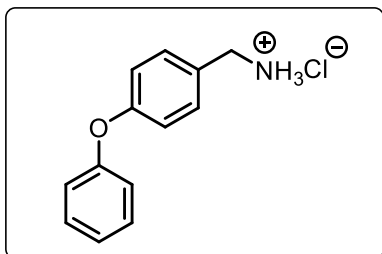

(4-phenoxyphenyl)methan ammonium chloride (**4j**)<sup>S13</sup>: <sup>1</sup>H NMR (400 MHz, DMSO-d<sub>6</sub>, 25 °C): δ = 8.64 (br s, 3H), 7.55 (d, *J* = 8.8 Hz, 2H), 7.41-7.37 (m, 2H), 7.17-7.13 (m, 1H), 7.02-6.98 (m, 4H), 3.98 (s, 2H); <sup>13</sup>C{<sup>1</sup>H} NMR (100 MHz, DMSO-d<sub>6</sub>, 25 °C): δ = 156.8, 156.4, 131.1, 130.1, 129.1, 123.7, 118.7, 118.5, 41.5. Yield: 81%.

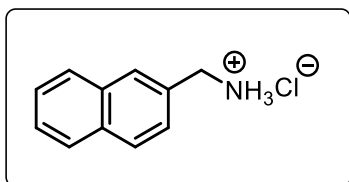

Naphthalen-2-ylmethan ammonium chloride (**4k**)<sup>S10</sup>: **<sup>1</sup>H NMR** (400 MHz, D<sub>2</sub>O, 25 °C):  $\delta$  = 7.96-7.90 (m, 4H), 7.60-7.56 (m, 2H), 7.49 (dd,  $J$  = 8.4, 1.6 Hz, 1H), 4.29 (s, 2H); **<sup>13</sup>C{<sup>1</sup>H}** NMR (125 MHz, D<sub>2</sub>O, 25 °C):  $\delta$  = 132.9 (d,  $J$  = 9.4 Hz), 130.1, 128.9, 128.2, 128.0, 127.7, 127.0 (d,  $J$  = 19.7 Hz), 125.9, 43.2. Yield: 71%.

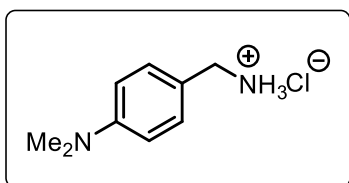

(4-(dimethylamino)phenyl)methan ammonium chloride (**4l**)<sup>S14</sup>: **<sup>1</sup>H NMR** (400 MHz, DMSO d<sub>6</sub>, 25 °C):  $\delta$  = 8.71 (br s, 3H), 7.66 (br s, 4H), 4.03-3.99 (m, 2H), 3.06 (s, 6H); **<sup>13</sup>C{<sup>1</sup>H}** NMR (125 MHz, DMSO d<sub>6</sub>, 25 °C):  $\delta$  = 145.2, 130.6, 119.0, 44.2, 41.6. Yield: 78%.

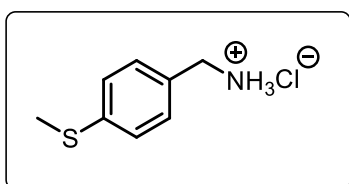

(4-(Methylthio)phenyl)methan ammonium chloride (**4m**)<sup>S15</sup>: **<sup>1</sup>H NMR** (400 MHz, D<sub>2</sub>O, 25 °C):  $\delta$  = 7.43-7.37 (m, 4H), 4.17 (s, 2H), 2.52 (s, 3H); **<sup>13</sup>C{<sup>1</sup>H}** NMR (125 MHz, D<sub>2</sub>O, 25 °C):  $\delta$  = 139.2, 129.6, 129.4, 126.6, 42.7, 14.4. Yield: 74%.

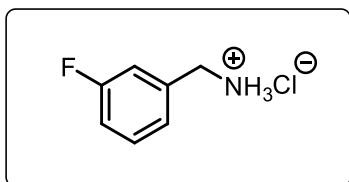

(3-fluorophenyl)methan ammonium chloride (**4n**)<sup>S9</sup>: **<sup>1</sup>H NMR** (400 MHz, D<sub>2</sub>O, 25 °C):  $\delta$  = 7.50 (dd,  $J$  = 14.4, 8.0 Hz, 1H), 7.29 (d,  $J$  = 8.0 Hz, 1H), 7.26-7.20 (m, 2H), 4.22 (s, 2H); **<sup>13</sup>C{<sup>1</sup>H} NMR** (125 MHz, D<sub>2</sub>O, 25 °C):  $\delta$  = 162.6 (d,  $J$  = 243.0 Hz), 134.8 (d,  $J$  = 7.9 Hz), 131.1 (d,  $J$  = 8.4 Hz), 124.7 (d,  $J$  = 2.7 Hz), 116.1 (d,  $J$  = 20.9 Hz), 115.7 (d,  $J$  = 22.4 Hz), 42.6; **<sup>19</sup>F{<sup>1</sup>H} NMR** (470 MHz, D<sub>2</sub>O, 25 °C):  $\delta$  = -112.76. Yield: 70%.

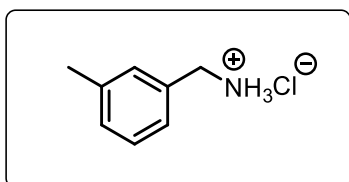

m-tolylmethan ammonium chloride (**4o**)<sup>S9</sup>: **<sup>1</sup>H NMR** (400 MHz, D<sub>2</sub>O, 25 °C):  $\delta$  = 7.37 (t,  $J$  = 7.6 Hz, 1H), 7.27 (dd,  $J$  = 18.4, 8.0 Hz, 3H), 4.14 (s, 2H), 2.36 (s, 3H); **<sup>13</sup>C{<sup>1</sup>H} NMR** (100 MHz, D<sub>2</sub>O, 25 °C):  $\delta$  = 139.5, 132.7, 129.8, 129.4, 129.2, 125.7, 43.1, 20.4. Yield: 62%.

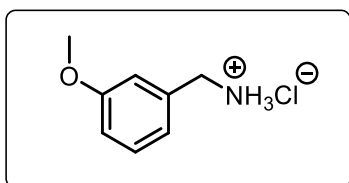

(3-methoxyphenyl)methan ammonium chloride (**4p**)<sup>S9</sup>: **<sup>1</sup>H NMR** (400 MHz, DMSO d<sub>6</sub>, 25 °C):  $\delta$  = 8.60 (br s, 3H), 7.30 (t,  $J$  = 7.6 Hz, 1H), 7.18 (s, 1H), 7.05 (d,  $J$  = 7.6 Hz, 1H), 6.94-6.91 (m, 1H), 3.96 (s, 2H), 3.76 (s, 3H); **<sup>13</sup>C{<sup>1</sup>H} NMR** (100 MHz, DMSO d<sub>6</sub>, 25 °C):  $\delta$  = 159.3, 135.6, 129.6, 120.9, 114.5, 113.9, 55.2, 42.0. Yield: 66%.



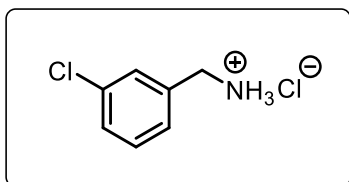

(3-chlorophenyl)methan ammonium chloride (**4q**)<sup>S10</sup>: **<sup>1</sup>H NMR** (400 MHz, D<sub>2</sub>O, 25 °C):  $\delta$  = 7.51-7.40 (m, 4H), 4.20 (s, 2H) ppm; **<sup>13</sup>C{<sup>1</sup>H} NMR** (125 MHz, D<sub>2</sub>O, 25 °C):  $\delta$  = 134.5, 134.2, 130.7, 129.2, 128.8, 127.2, 42.5. Yield: 79%.

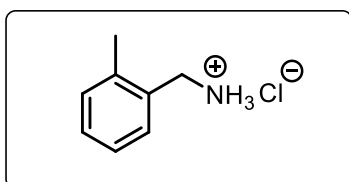

o-tolylmethan ammonium chloride (**4r**)<sup>S10</sup>: **<sup>1</sup>H NMR** (400 MHz, D<sub>2</sub>O, 25 °C):  $\delta$  = 7.40-7.31 (m, 4H), 4.24 (s, 2H), 2.39 (s, 3H); **<sup>13</sup>C{<sup>1</sup>H} NMR** (125 MHz, D<sub>2</sub>O, 25 °C):  $\delta$  = 137.2, 131.0, 130.9, 129.4, 129.1, 126.7, 40.5, 18.0. Yield: 41%.

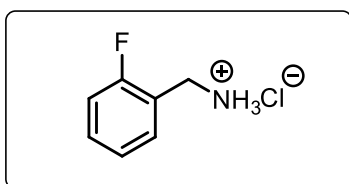

(2-fluorophenyl)methan ammonium chloride (**4s**)<sup>S16</sup>: **<sup>1</sup>H NMR** (400 MHz, D<sub>2</sub>O, 25 °C):  $\delta$  = 7.54-7.48 (m, 2H), 7.32-7.24 (m, 2H), 4.28 (s, 2H); **<sup>13</sup>C{<sup>1</sup>H} NMR** (125 MHz, D<sub>2</sub>O, 25 °C):  $\delta$  = 160.9 (d,  $J$  = 244.7 Hz), 131.7 (d,  $J$  = 8.5 Hz), 131.2 (d,  $J$  = 2.5 Hz), 125.0 (d,  $J$  = 3.1 Hz), 119.6 (d,  $J$  = 15.1 Hz), 115.8 (d,  $J$  = 21.0 Hz), 37.2 (d,  $J$  = 3.5 Hz); **<sup>19</sup>F{<sup>1</sup>H} NMR** (470 MHz, D<sub>2</sub>O, 25 °C):  $\delta$  = -118.2. Yield: 30%.

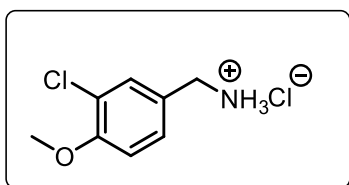

(3-chloro-4-methoxyphenyl)methan ammonium chloride (**4t**)<sup>S17</sup>: **<sup>1</sup>H NMR** (400 MHz, DMSO *d*<sub>6</sub>, 25 °C):  $\delta$  = 8.61 (br s, 3H), 7.64 (d, *J* = 2.0 Hz, 1H), 7.46 (dd, *J* = 8.4, 2.0 Hz, 1H), 7.16 (d, *J* = 8.4 Hz, 1H), 3.93 (s, 2H), 3.85 (s, 3H); **<sup>13</sup>C{<sup>1</sup>H} NMR** (100 MHz, DMSO *d*<sub>6</sub>, 25 °C):  $\delta$  = 154.5, 130.7, 129.4, 127.2, 120.7, 112.7, 56.2, 41.0. Yield: 79%.

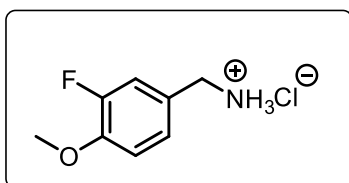

(3-fluoro-4-methoxyphenyl)methan ammonium chloride (**4u**)<sup>S17</sup>: **<sup>1</sup>H NMR** (400 MHz, DMSO *d*<sub>6</sub>, 25 °C):  $\delta$  = 8.62 (br s, 3H), 7.45 (dd, *J* = 12.4, 2.0 Hz, 1H), 7.29 (d, *J* = 8.0 Hz, 1H), 7.18 (t, *J* = 8.8 Hz, 1H), 3.93 (s, 2H), 3.83 (s, 3H); **<sup>13</sup>C{<sup>1</sup>H} NMR** (125 MHz, DMSO *d*<sub>6</sub>, 25 °C):  $\delta$  = 151.0 (d, *J* = 242.5 Hz), 147.2 (d, *J* = 10.1 Hz), 126.8 (d, *J* = 6.7 Hz), 125.8, 116.8 (d, *J* = 18.7 Hz), 113.7, 56.1, 41.2; **<sup>19</sup>F{<sup>1</sup>H} NMR** (470 MHz, D<sub>2</sub>O, 25 °C):  $\delta$  = -135.2. Yield: 92%.

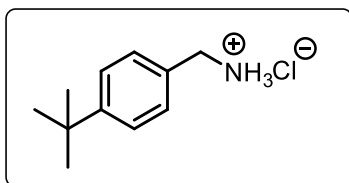

(4-(tert-butyl)phenyl)methan ammonium chloride (**4v**)<sup>S12</sup>: **<sup>1</sup>H NMR** (400 MHz, DMSO d<sub>6</sub>, 25 °C): δ = 8.59 (br s, 3H), 7.45-7.39 (m, 4H), 3.94 (s, 2H), 1.27 (s, 9H); **<sup>13</sup>C{<sup>1</sup>H} NMR** (125 MHz, DMSO d<sub>6</sub>, 25 °C): δ = 150.9, 131.2, 128.8, 125.3, 41.8, 34.3, 31.1. Yield: 66%.

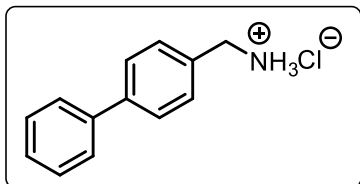

[1,1'-biphenyl]-4-ylmethan ammonium chloride (**4w**)<sup>S12</sup>: **<sup>1</sup>H NMR** (400 MHz, DMSO d<sub>6</sub>, 25 °C): δ = 8.72 (br s, 3H), 7.68 (t, *J* = 8.4 Hz, 4H), 7.62 (d, *J* = 8.4 Hz, 2H), 7.47 (t, *J* = 7.6 Hz, 2H), 7.37 (t, *J* = 7.2 Hz, 1H), 4.05 (s, 2H); **<sup>13</sup>C{<sup>1</sup>H} NMR** (100 MHz, DMSO d<sub>6</sub>, 25 °C): δ = 140.1, 139.5, 133.3, 129.6, 129.0, 127.7, 126.7, 41.8. Yield: 67%.

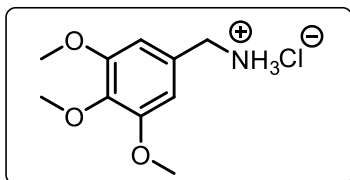

(3,4,5-trimethoxyphenyl)methan ammonium chloride (**4x**)<sup>S18</sup>: **<sup>1</sup>H NMR** (400 MHz, DMSO d<sub>6</sub>, 25 °C): δ = 8.63 (br s, 3H), 6.95 (s, 2H), 3.93 (s, 2H), 3.78 (s, 6H), 3.64 (s, 3H); **<sup>13</sup>C{<sup>1</sup>H} NMR** (100 MHz, DMSO d<sub>6</sub>, 25 °C): δ = 152.8, 137.3, 129.7, 106.6, 60.0, 56.0, 42.4. Yield: 85%.

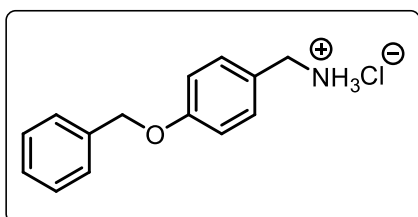

(4-(benzyloxy)phenyl)methan ammonium chloride (**4y**)<sup>S18</sup>: **<sup>1</sup>H NMR** (400 MHz, DMSO d<sub>6</sub>, 25 °C): δ = 8.41 (br s, 3H), 7.45-7.30 (m, 7H), 7.03 (d, *J* = 8.4 Hz, 2H), 5.13 (s, 2H), 3.92 (s, 2H); **<sup>13</sup>C{<sup>1</sup>H} NMR** (100 MHz, DMSO d<sub>6</sub>, 25 °C): δ = 158.3, 136.9, 130.5, 128.4, 127.8, 127.6, 126.2, 114.8, 69.1, 41.6. Yield: 61%.

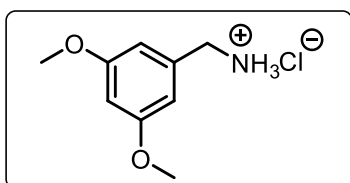

(3,5-dimethoxyphenyl)methan ammonium chloride (**4z**)<sup>S19</sup>: **<sup>1</sup>H NMR** (400 MHz, DMSO d<sub>6</sub>, 25 °C): δ = 8.65 (br s, 3H), 6.75 (d, *J* = 2.0 Hz, 2H), 6.47 (t, *J* = 2.0 Hz, 1H), 3.92 (s, 2H), 3.74 (s, 6H); **<sup>13</sup>C{<sup>1</sup>H} NMR** (100 MHz, DMSO d<sub>6</sub>, 25 °C): δ = 160.5, 136.3, 106.9, 100.0, 55.3, 42.2. Yield: 88%.

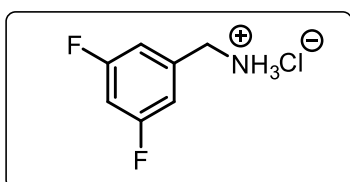

(3,5-difluorophenyl)methan ammonium chloride (**4aa**)<sup>S20</sup>: **<sup>1</sup>H NMR** (400 MHz, D<sub>2</sub>O, 25 °C): δ = 7.12-7.08 (m, 2H), 7.07-7.02 (m, 1H), 4.23 (s, 2H); **<sup>13</sup>C{<sup>1</sup>H} NMR** (125 MHz, D<sub>2</sub>O, 25 °C): δ = 163.9 (d, *J* = 13.4 Hz), 162.0 (d, *J* = 13.4 Hz), 136.1 (t, *J* = 10.0 Hz), 111.9 (q), 104.6 (t, *J* = 25.1 Hz), 42.3; **<sup>19</sup>F{<sup>1</sup>H} NMR** (470 MHz, D<sub>2</sub>O, 25 °C): δ = -109.2. Yield: 78%.

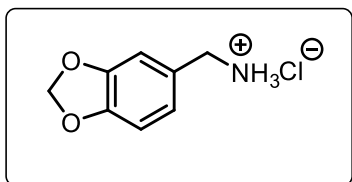

benzo[d][1,3]dioxol-5-ylmethan ammonium chloride (**4ab**)<sup>S14</sup>: **<sup>1</sup>H NMR** (400 MHz, DMSO d<sub>6</sub>, 25 °C):  $\delta$  = 8.56 (br s, 3H), 7.15 (s, 1H), 6.98-6.91 (m, 2H), 6.02 (s, 2H), 3.89 (s, 2H); **<sup>13</sup>C{<sup>1</sup>H}** **NMR** (125 MHz, DMSO d<sub>6</sub>, 25 °C):  $\delta$  = 147.2, 127.7, 122.9, 109.5, 108.2, 101.2, 41.9. Yield: 88%.

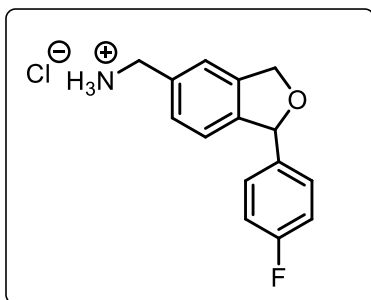

(1-(4-fluorophenyl)-1,3-dihydroisobenzofuran-5-yl)methan ammonium chloride (**4ac**)<sup>S21</sup>: **<sup>1</sup>H NMR** (400 MHz, DMSO d<sub>6</sub>, 25 °C):  $\delta$  = 8.60 (br s, 3H), 7.52 (s, 1H), 7.41-7.35 (m, 3H), 7.20-7.16 (m, 2H), 7.09-7.07 (m, 1H), 6.19 (s, 1H), 5.31-5.27 (m, 1H), 5.14-5.11 (m, 1H), 4.01 (s, 2H); **<sup>13</sup>C{<sup>1</sup>H}** **NMR** (125 MHz, DMSO d<sub>6</sub>, 25 °C):  $\delta$  = 161.7 (d,  $J$  = 242.5 Hz), 142.1, 139.1, 138.8 (d,  $J$  = 3.0 Hz), 133.8, 128.5 (t,  $J$  = 10.0 Hz), 122.1 (d,  $J$  = 23.4 Hz), 115.2 (d,  $J$  = 21.4 Hz), 84.0, 72.4, 41.9; **<sup>19</sup>F{<sup>1</sup>H}** **NMR** (470 MHz, DMSO d<sub>6</sub>, 25 °C):  $\delta$  = -114.7. Yield: 84%.

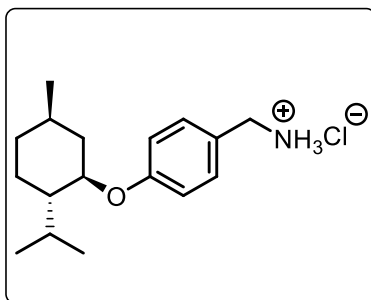

4-((1R,2S,5R)-2-Isopropyl-5-methylcyclohexoxy)phenylmethan ammonium chloride (**4ad**):  $^1\text{H NMR}$  (400 MHz,  $\text{CD}_3\text{OD}$ , 25 °C):  $\delta$  = 8.94 (d,  $J$  = 8.8 Hz, 2H), 8.53 (d,  $J$  = 8.8 Hz, 2H), 5.71 (dt,  $J$  = 10.4, 4.0 Hz, 1H), 5.60 (s, 2H), 3.72-3.66 (m, 2H), 3.33-3.26 (m, 2H), 3.14-3.02 (m, 2H), 2.78-2.68 (m, 2H), 2.55-2.51(m, 1H), 2.48 (d,  $J$  = 6.4 Hz, 6H), 2.32 (d,  $J$  = 6.8 Hz, 3H);  $^{13}\text{C}\{^1\text{H}\}$  NMR (125 MHz,  $\text{CD}_3\text{OD}$ , 25 °C):  $\delta$  = 160.5, 131.7, 126.0, 117.0, 78.5, 49.5, 43.9, 41.4, 35.6, 32.4, 27.5, 24.9, 22.5, 21.0, 17.1; **HRMS**:  $m/z$  calc. for  $[\text{C}_{17}\text{H}_{25}\text{O}-\text{Cl}-\text{NH}_3]^+$  : 245.189, found: 245.189. Yield: 68%.

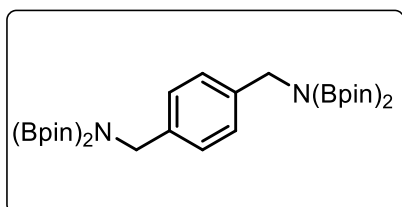

$\text{N,N}'$ -(1,4-phenylenebis(methylene))bis(4,4,5,5-tetramethyl-N-(4,4,5,5-tetramethyl-1,3,2-dioxaborolan-2-yl)-1,3,2-dioxaborolan-2-amine) (**3ae**)<sup>S7</sup>:  $^1\text{H NMR}$  (400 MHz,  $\text{CDCl}_3$ , 25 °C):  $\delta$  = 7.09 (s, 4H), 4.11 (s, 4H), 1.11 (s, 48H);  $^{13}\text{C}\{^1\text{H}\}$  NMR (125 MHz,  $\text{CDCl}_3$ , 25 °C):  $\delta$  = 140.7, 126.9, 82.3, 47.0, 24.6;  $^{11}\text{B}\{^1\text{H}\}$  NMR (128 MHz,  $\text{CDCl}_3$ , 25 °C):  $\delta$  = 26.02. Yield: 88%.

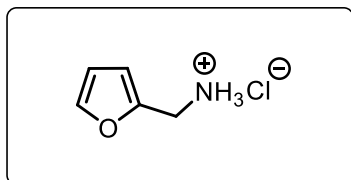

Furan-2-ylmethan ammonium chloride (**4af**)<sup>S22</sup>:  $^1\text{H NMR}$  (400 MHz,  $\text{DMSO}-d_6$ , 25 °C):  $\delta$  = 8.64 (br s, 3H), 7.72 (s, 1H), 6.56-6.55 (m, 1H), 6.49-6.48 (m, 1H), 4.03 (s, 2H);  $^{13}\text{C}\{^1\text{H}\}$  NMR (125 MHz,  $\text{DMSO}-d_6$ , 25 °C):  $\delta$  = 147.7, 143.5, 110.9, 110.3, 34.9. Yield: 67%.

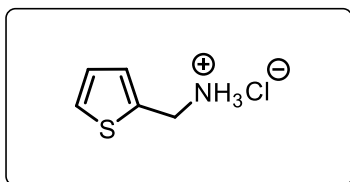

Thiophen-2-ylmethan ammonium chloride (**4ag**)<sup>S23</sup>:  $^1\text{H NMR}$  (400 MHz, DMSO  $d_6$ , 25 °C):  $\delta$  = 8.64 (br s, 3H), 7.57-7.55 (m, 1H), 7.29 (d,  $J$  = 2.8 Hz, 1H), 7.06 (dd,  $J$  = 4.8, 4.0 Hz, 1H), 4.20 (s, 2H);  $^{13}\text{C}\{^1\text{H}\}$  NMR (125 MHz, DMSO  $d_6$ , 25 °C):  $\delta$  = 135.3, 129.1, 127.2, 36.6. Yield: 45%.

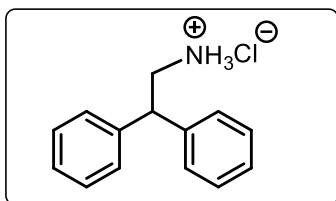

2,2-Diphenylethyl ammonium chloride (**4ah**)<sup>S24</sup>:  $^1\text{H NMR}$  (400 MHz,  $\text{D}_2\text{O}$ , 25 °C):  $\delta$  = 7.38 (d,  $J$  = 4.4 Hz, 8H), 7.35-7.30 (m, 2H), 4.35 (t,  $J$  = 8.4 Hz, 1H), 3.72 (d,  $J$  = 8.4 Hz, 2H);  $^{13}\text{C}\{^1\text{H}\}$  NMR (100 MHz,  $\text{D}_2\text{O}$ , 25 °C):  $\delta$  = 140.0, 129.3, 127.7, 48.6, 43.1. Yield: 67%.

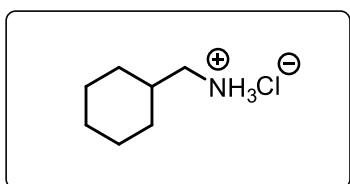

Cyclohexylmethan ammonium chloride (**4ai**)<sup>S25</sup>:  $^1\text{H NMR}$  (400 MHz, DMSO  $d_6$ , 25 °C):  $\delta$  = 8.12 (br s, 3H), 2.59 (d,  $J$  = 6.8 Hz, 2H), 1.75 -1.54 (m, 6H), 1.22-1.06 (m, 3H), 0.94-0.85 (m, 2H);  $^{13}\text{C}\{^1\text{H}\}$  NMR (100 MHz, DMSO  $d_6$ , 25 °C):  $\delta$  = 44.3, 35.4, 29.8, 25.6, 25.0. Yield: 59%.

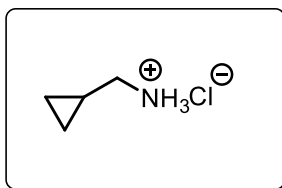

Cyclopropylmethan ammonium chloride (**4aj**)<sup>S12</sup>: **<sup>1</sup>H NMR** (400 MHz, DMSO d<sub>6</sub>, 25 °C): δ = 8.17 (br s, 3H), 2.63 (d, *J* = 7.6 Hz, 2H), 1.06 -0.99 (m, 1H), 0.53-0.48 (m, 2H), 0.33-0.30 (m, 2H); **<sup>13</sup>C{<sup>1</sup>H} NMR** (125 MHz, DMSO d<sub>6</sub>, 25 °C): δ = 43.4, 8.5, 3.8. Yield: 65%.

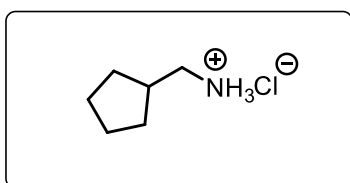

Cyclopentylmethan ammonium chloride (**4ak**)<sup>S25</sup>: **<sup>1</sup>H NMR** (400 MHz, DMSO d<sub>6</sub>, 25 °C): δ = 8.16 (br s, 3H), 2.69 (d, *J* = 7.2 Hz, 2H), 2.14 -2.06 (m, 1H), 1.76-1.69 (m, 2H), 1.61-1.46 (m, 4H), 1.25-1.17 (m, 2H); **<sup>13</sup>C{<sup>1</sup>H} NMR** (125 MHz, DMSO d<sub>6</sub>, 25 °C): δ = 43.3, 37.5, 29.8, 24.6. Yield: 74%.

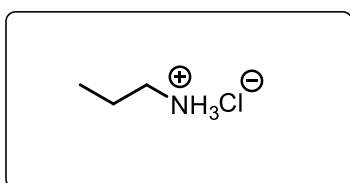

propyl ammonium chloride (**4al**)<sup>S26</sup>: **<sup>1</sup>H NMR** (400 MHz, D<sub>2</sub>O, 25 °C): δ = 2.98 (t, *J* = 7.2 Hz, 2H), 1.74-1.64 (m, 2H), 0.99 (t, *J* = 7.6 Hz, 3H); **<sup>13</sup>C{<sup>1</sup>H} NMR** (100 MHz, D<sub>2</sub>O, 25 °C): δ = 41.2, 20.3, 10.1. Yield: 68%.



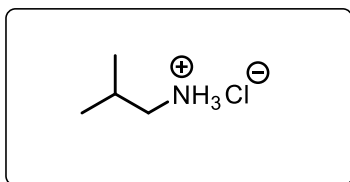

2-methylpropan-1- ammonium chloride (**4am**)<sup>S12</sup>: **<sup>1</sup>H NMR** (400 MHz, DMSO d<sub>6</sub>, 25 °C): δ = 8.15 (br s, 3H), 2.59-2.57 (m, 2H), 1.89 (sept, *J* = 6.8 Hz, 1H), 0.91 (d, *J* = 6.8 Hz, 6H); **<sup>13</sup>C{<sup>1</sup>H} NMR** (125 MHz, DMSO d<sub>6</sub>, 25 °C): δ = 45.6, 30.7, 26.3, 19.9. Yield: 86%.

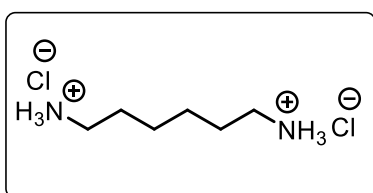

hexane-1,6-diammonium chloride (**4an**)<sup>S17</sup>: **<sup>1</sup>H NMR** (400 MHz, DMSO d<sub>6</sub>, 25 °C): δ = 8.05 (br s, 6H), 2.74 (t, *J* = 7.2 Hz, 4H), 1.57-1.54 (m, 4H), 1.33-1.29 (m, 4H); **<sup>13</sup>C{<sup>1</sup>H} NMR** (125 MHz, DMSO d<sub>6</sub>, 25 °C): δ = 38.5, 26.7, 25.3. Yield: 50%.

### 3.2) $^1\text{H}$ and $^{13}\text{C}$ NMR Spectra of Products

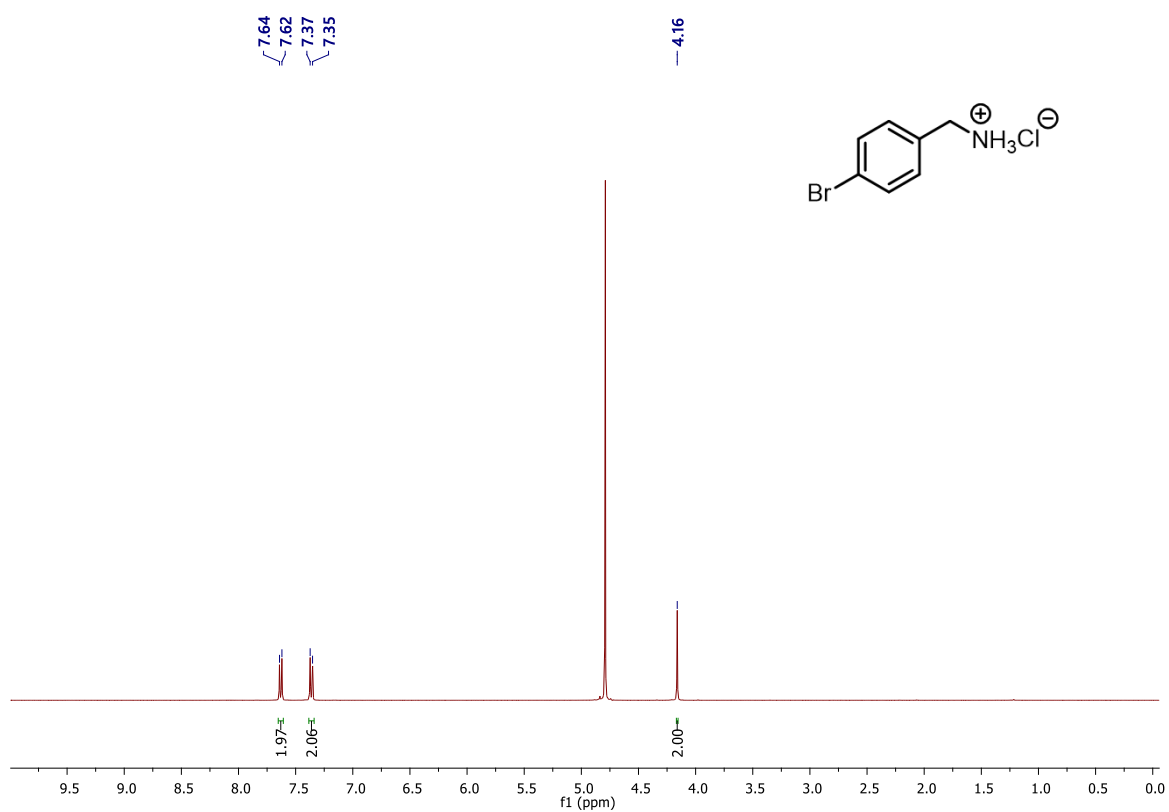

*Fig. S14*  $^1\text{H}$  NMR spectrum of **4a** in  $\text{D}_2\text{O}$ . <sup>S8</sup>

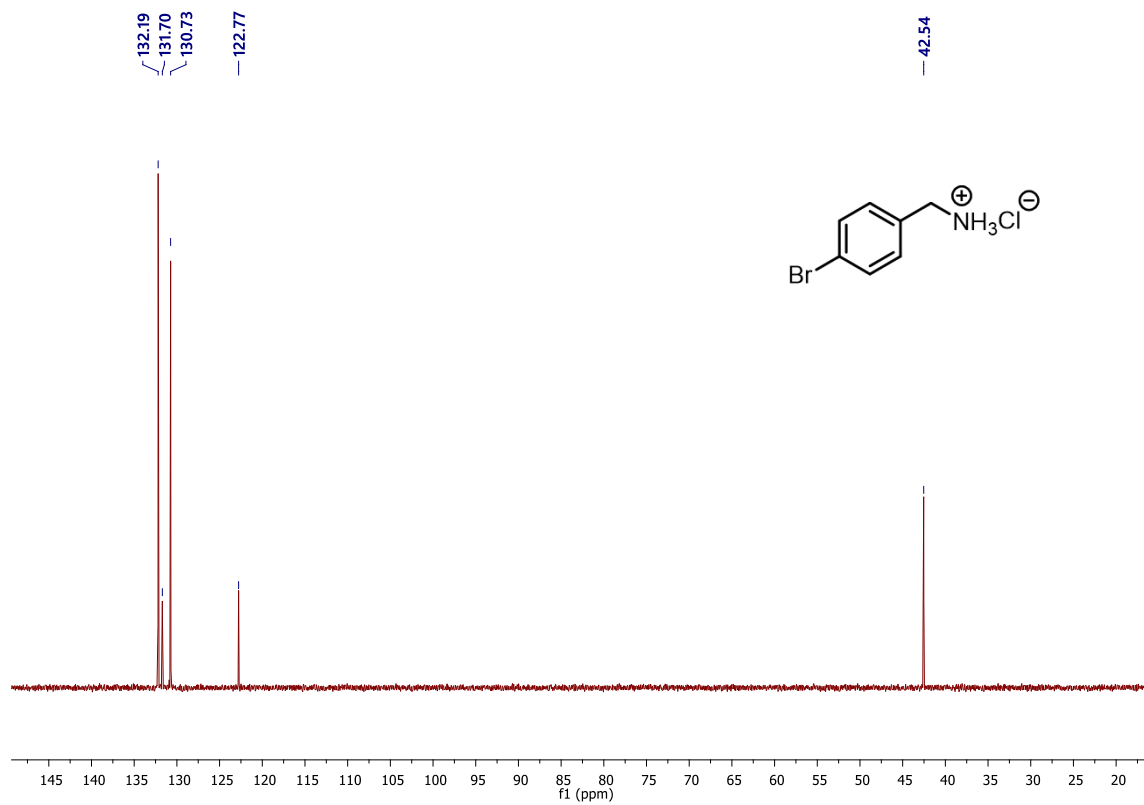

*Fig. S15*  $^{13}\text{C}\{^1\text{H}\}$  NMR spectrum of **4a** in  $\text{D}_2\text{O}$ . <sup>S8</sup>

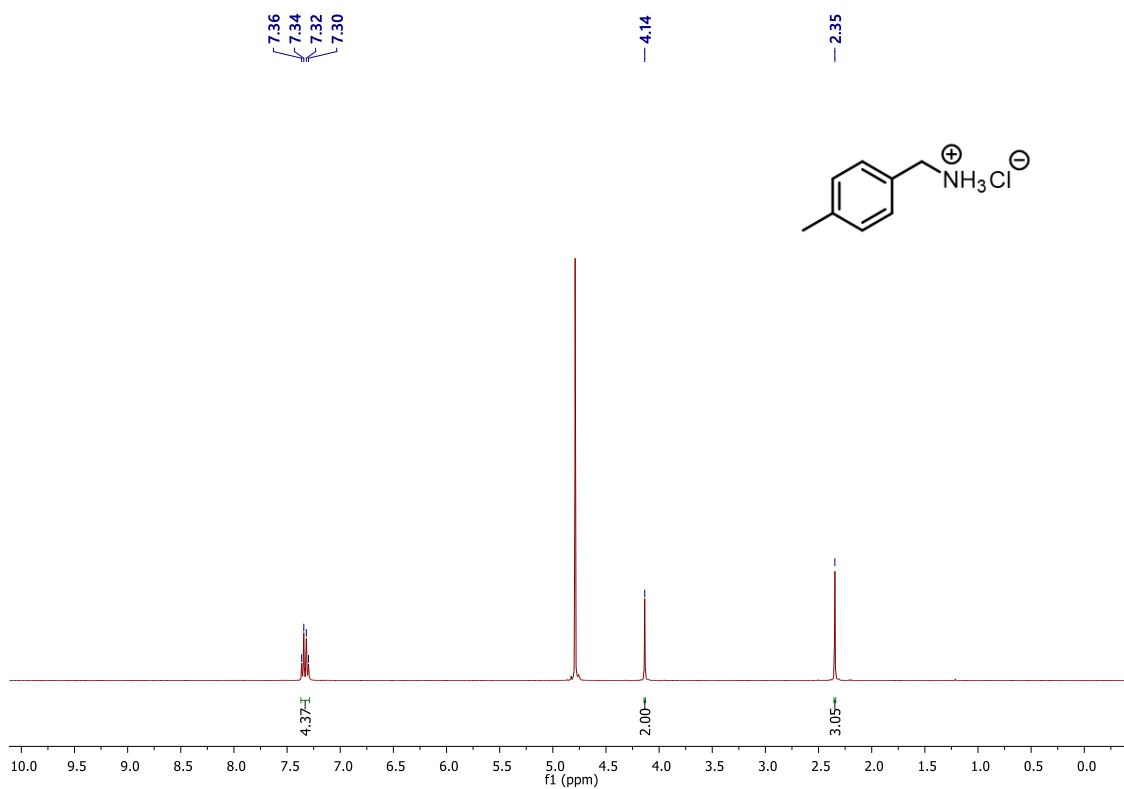

Fig. S16 <sup>1</sup>H NMR spectrum of **4b** in D<sub>2</sub>O. <sup>S9</sup>

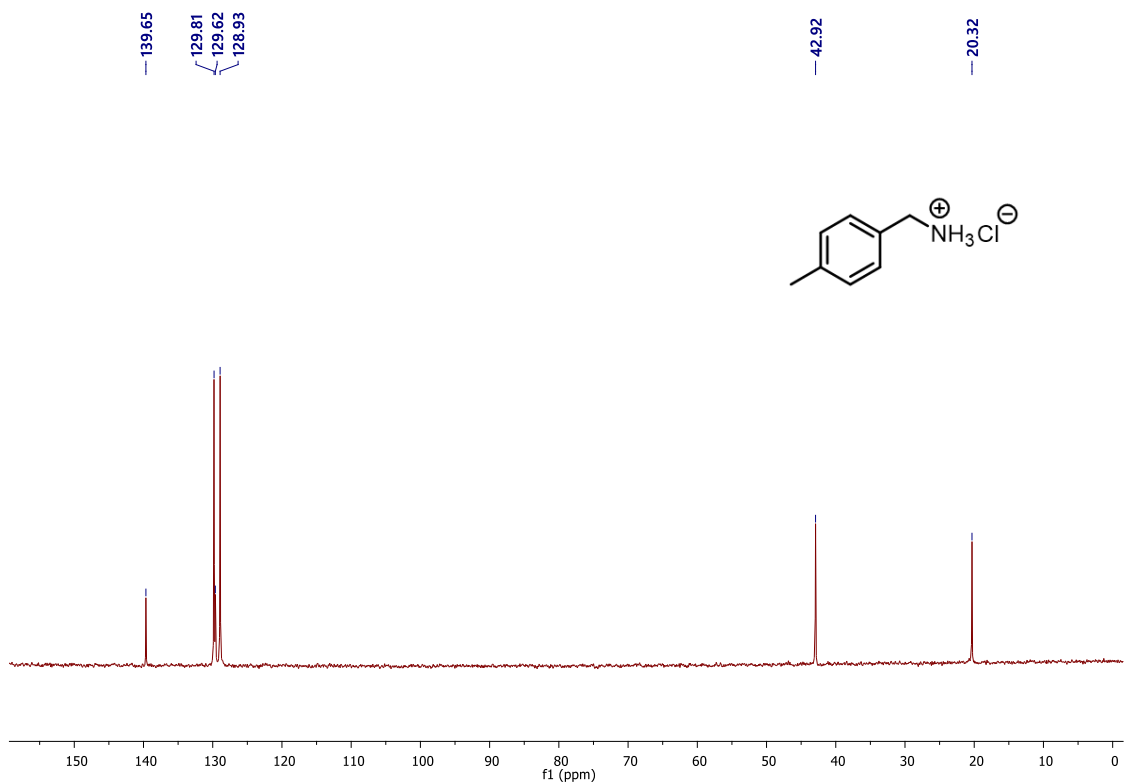

Fig. S17 <sup>13</sup>C{<sup>1</sup>H} NMR spectrum of **4b** in D<sub>2</sub>O. <sup>S9</sup>

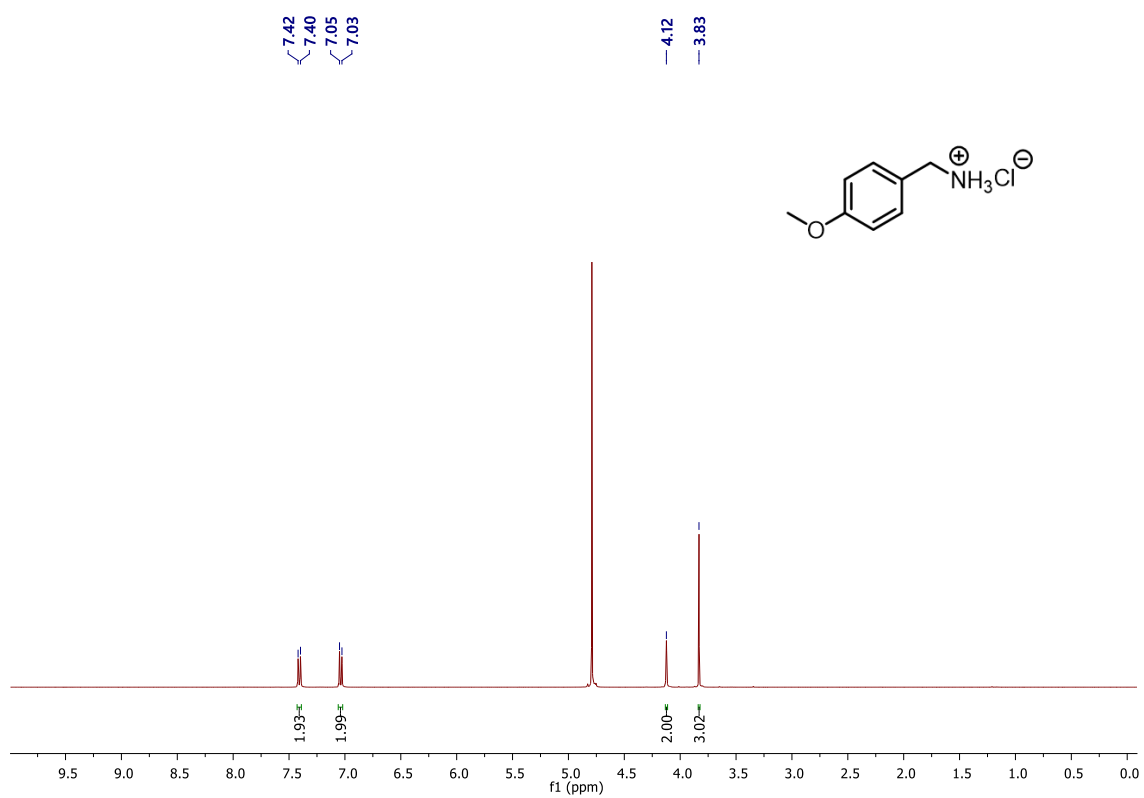

Fig. S18  $^1\text{H}$  NMR spectrum of **4c** in  $\text{D}_2\text{O}$ .<sup>S9</sup>

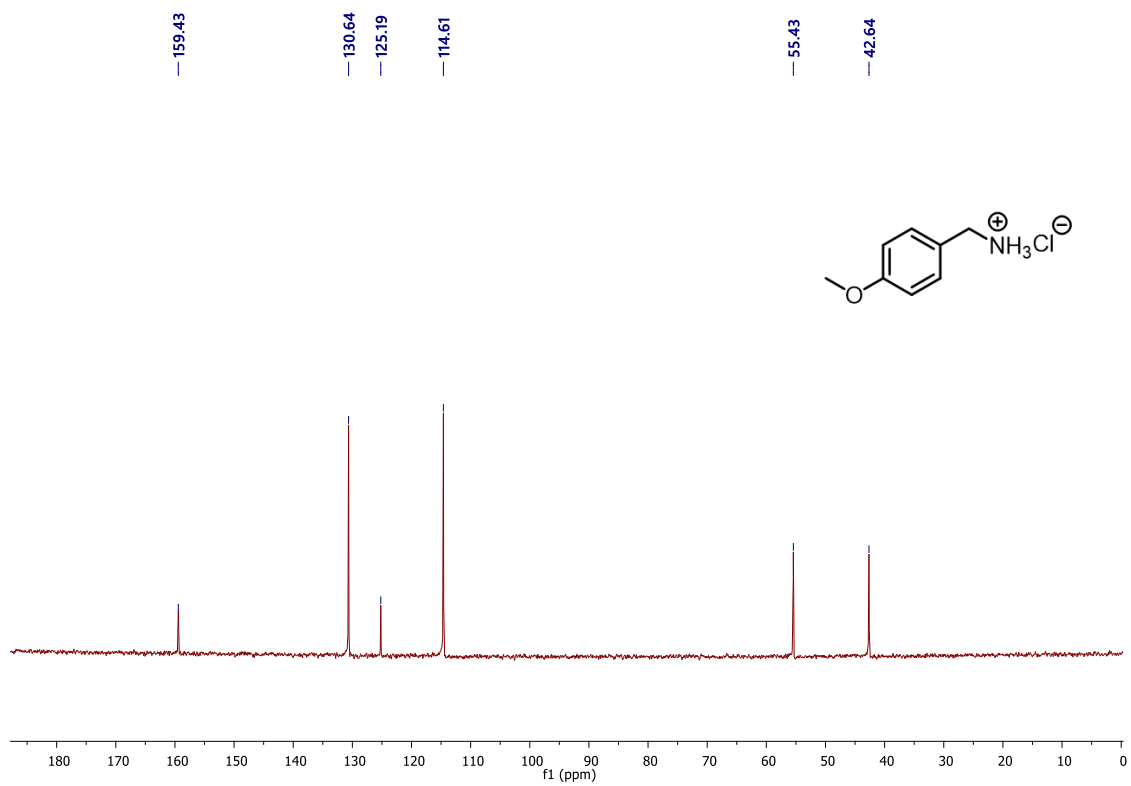

Fig. S19  $^{13}\text{C}\{^1\text{H}\}$  NMR spectrum of **4c** in  $\text{D}_2\text{O}$ .<sup>S9</sup>

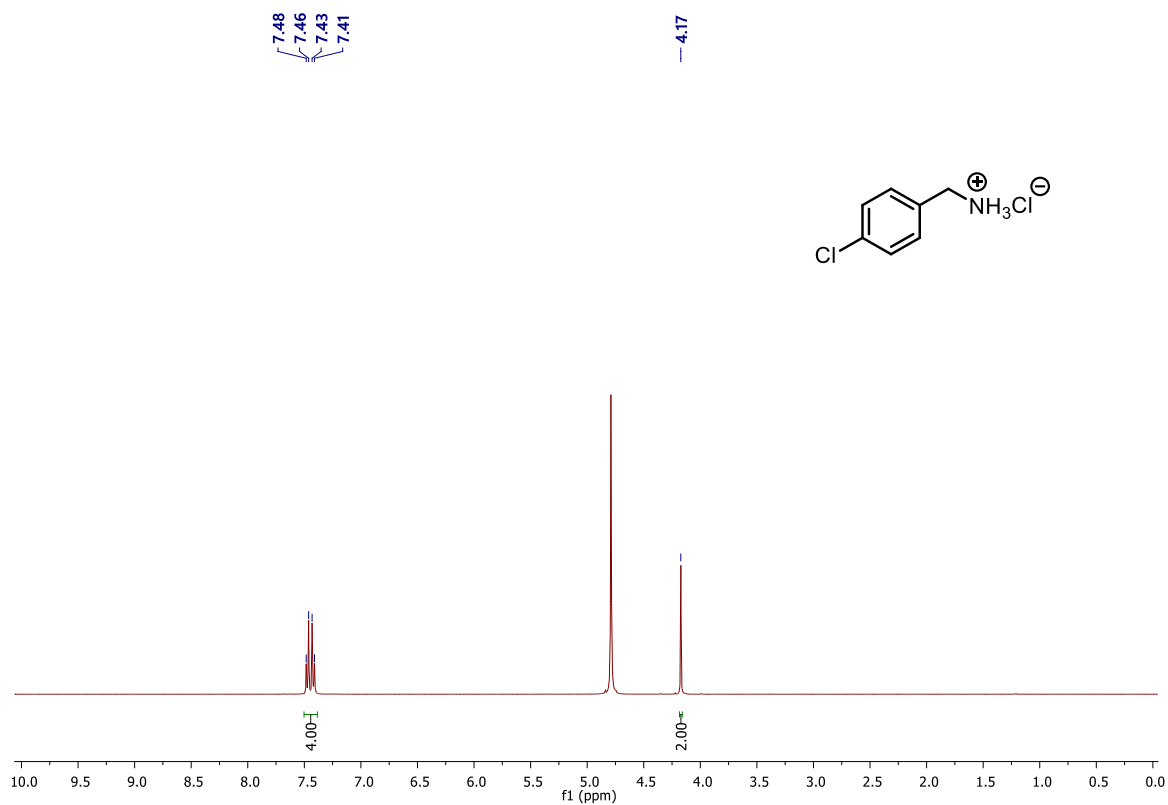

Fig. S20  $^1\text{H}$  NMR spectrum of **4d** in  $\text{D}_2\text{O}$ .<sup>S10</sup>

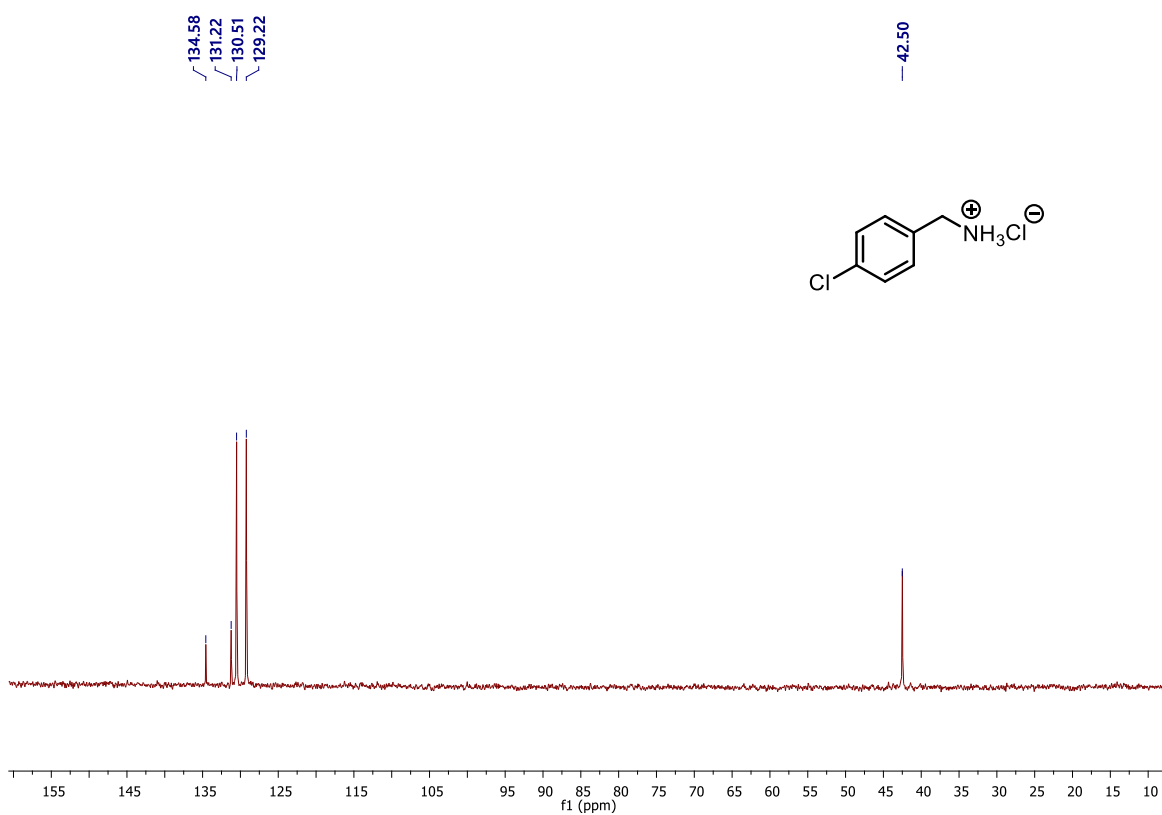

Fig. S21  $^{13}\text{C}\{^1\text{H}\}$  NMR spectrum of **4d** in  $\text{D}_2\text{O}$ .<sup>S10</sup>

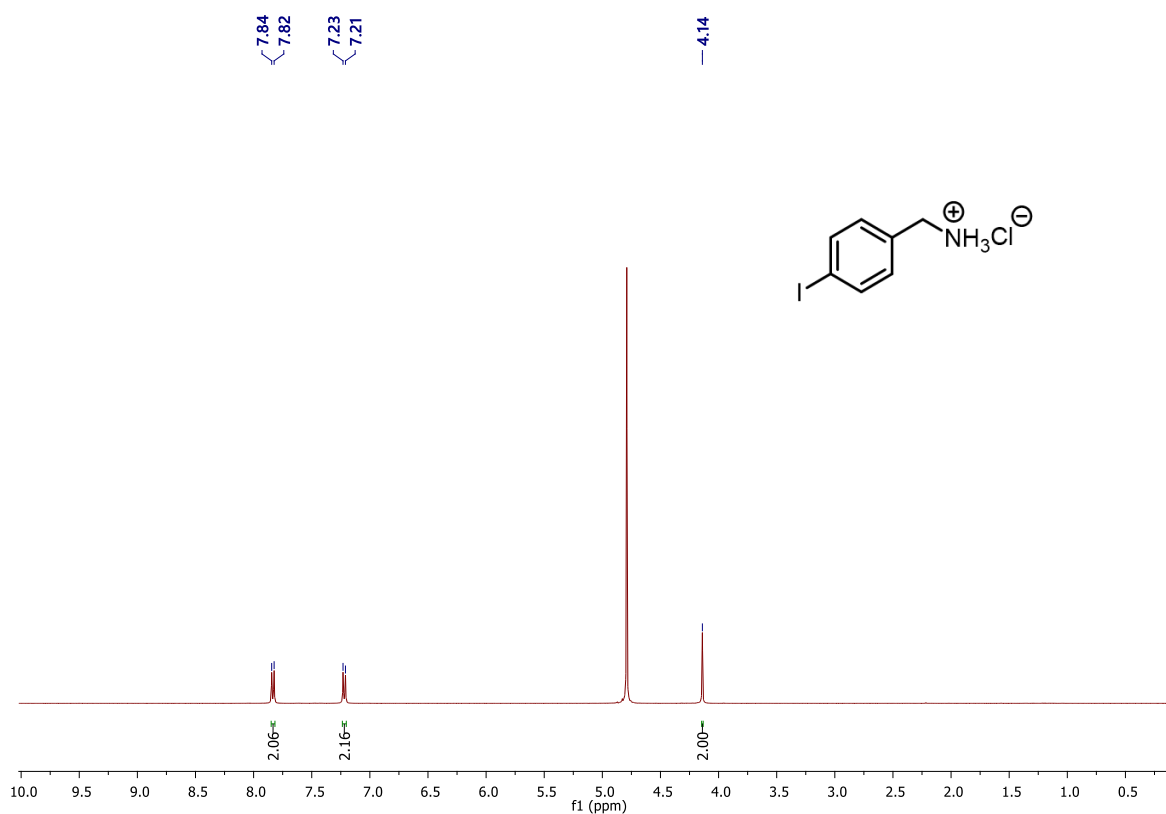

Fig. S22 <sup>1</sup>H NMR spectrum of **4e** in D<sub>2</sub>O. <sup>S8</sup>

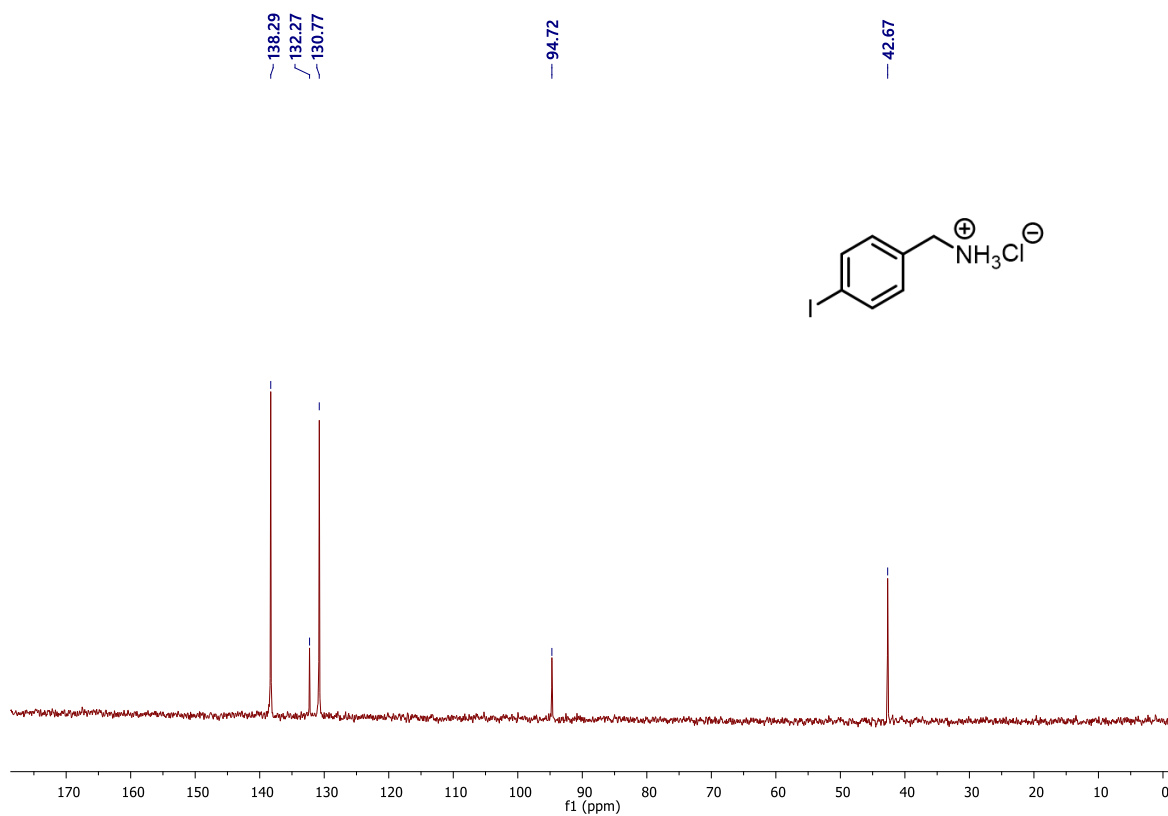

Fig. S23 <sup>13</sup>C{<sup>1</sup>H} NMR spectrum of **4e** in D<sub>2</sub>O. <sup>S8</sup>

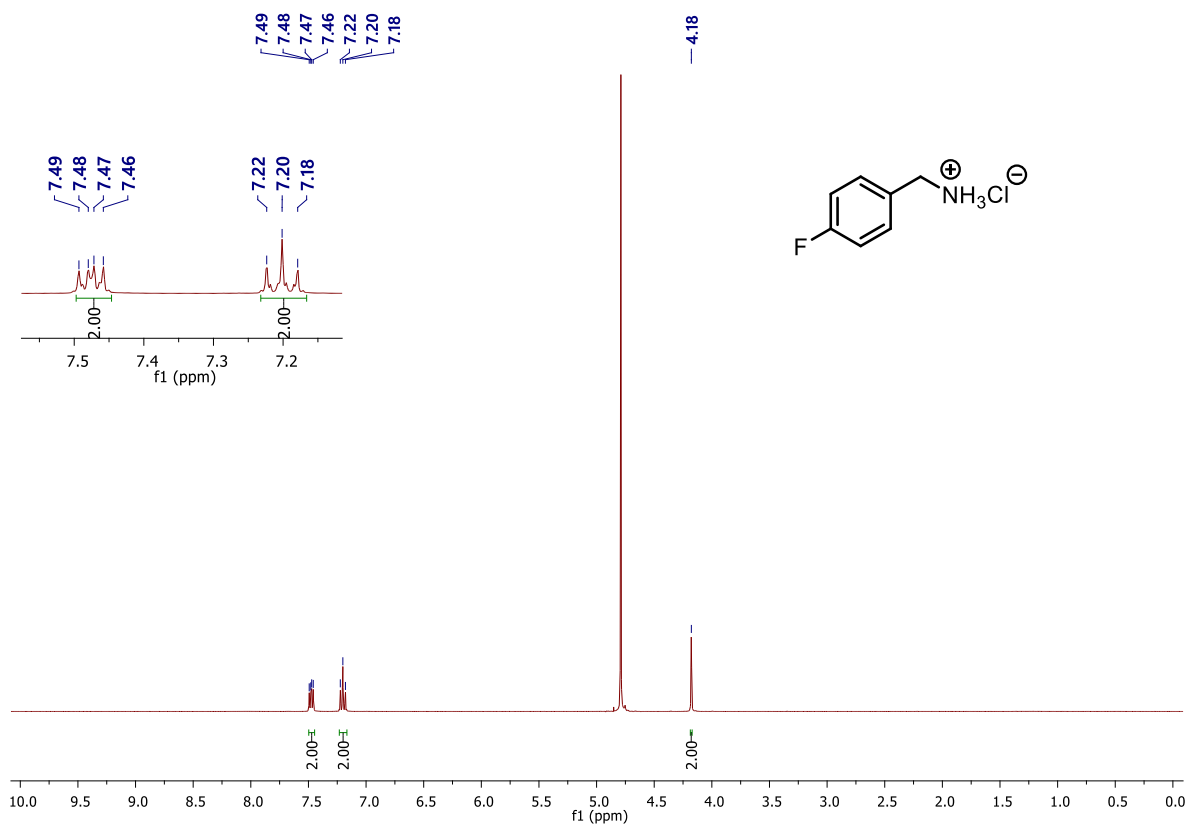

**Fig. S24** <sup>1</sup>H NMR spectrum of **4f** in D<sub>2</sub>O. <sup>S11</sup>

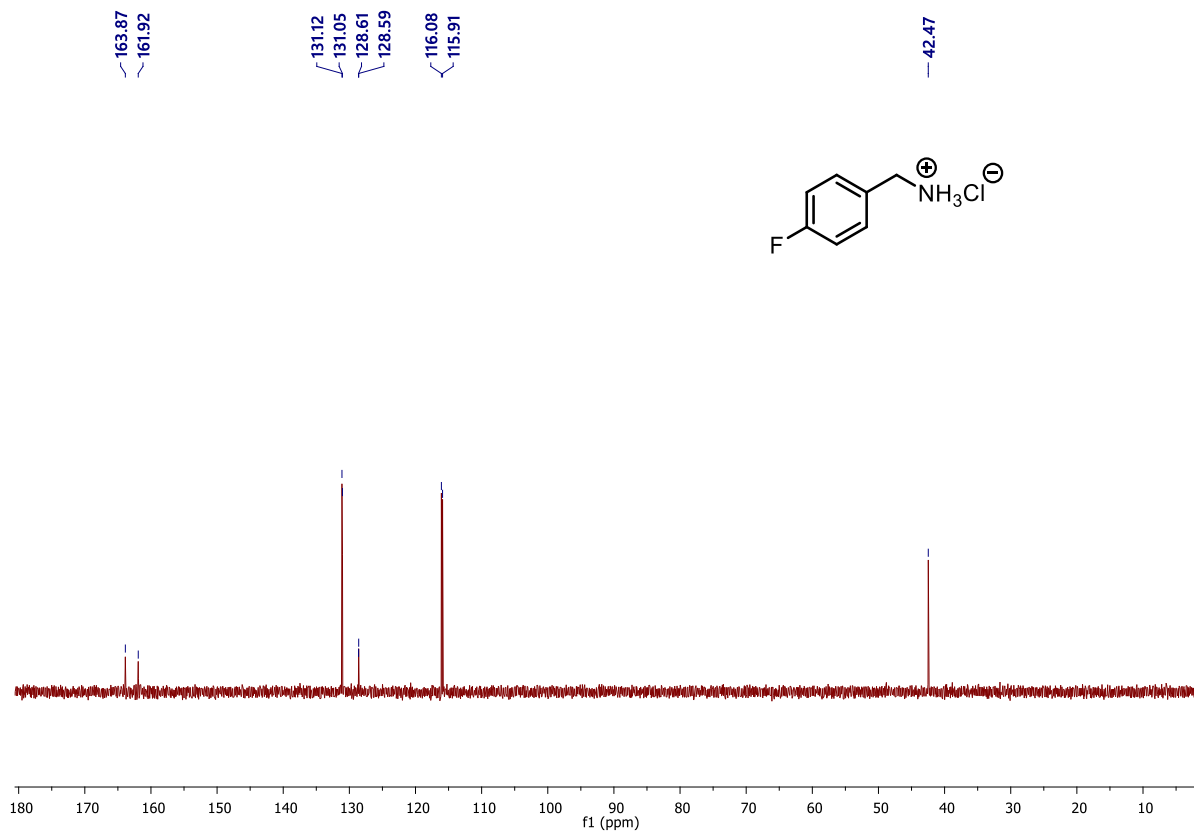

**Fig. S25** <sup>13</sup>C{<sup>1</sup>H} NMR spectrum of **4f** in D<sub>2</sub>O. <sup>S11</sup>

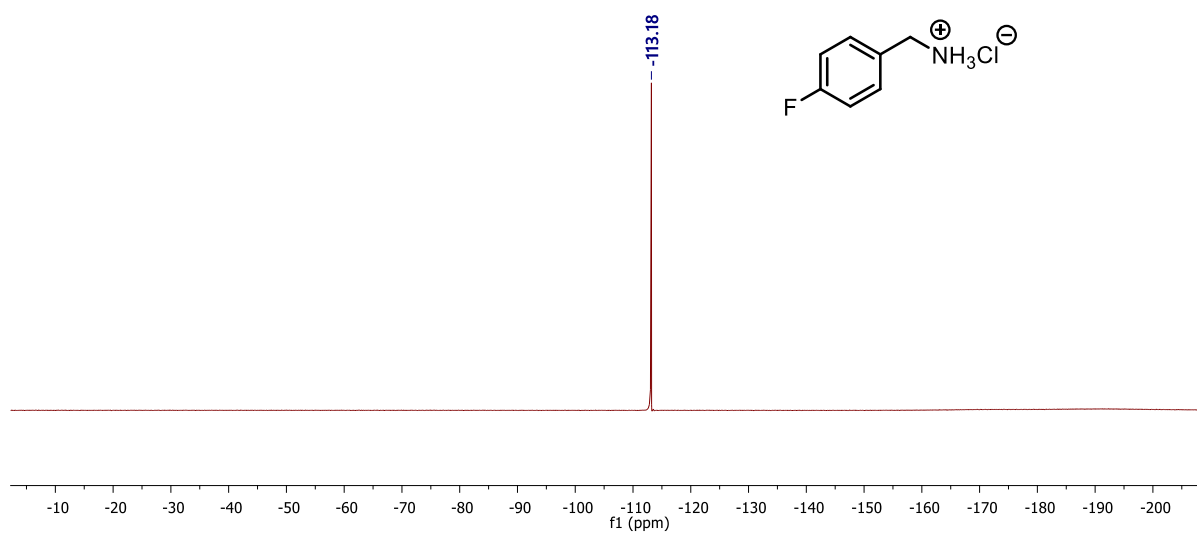

**Fig. S26**  $^{19}\text{F}\{^1\text{H}\}$  NMR spectrum of **4f** in  $\text{D}_2\text{O}$ .<sup>S11</sup>

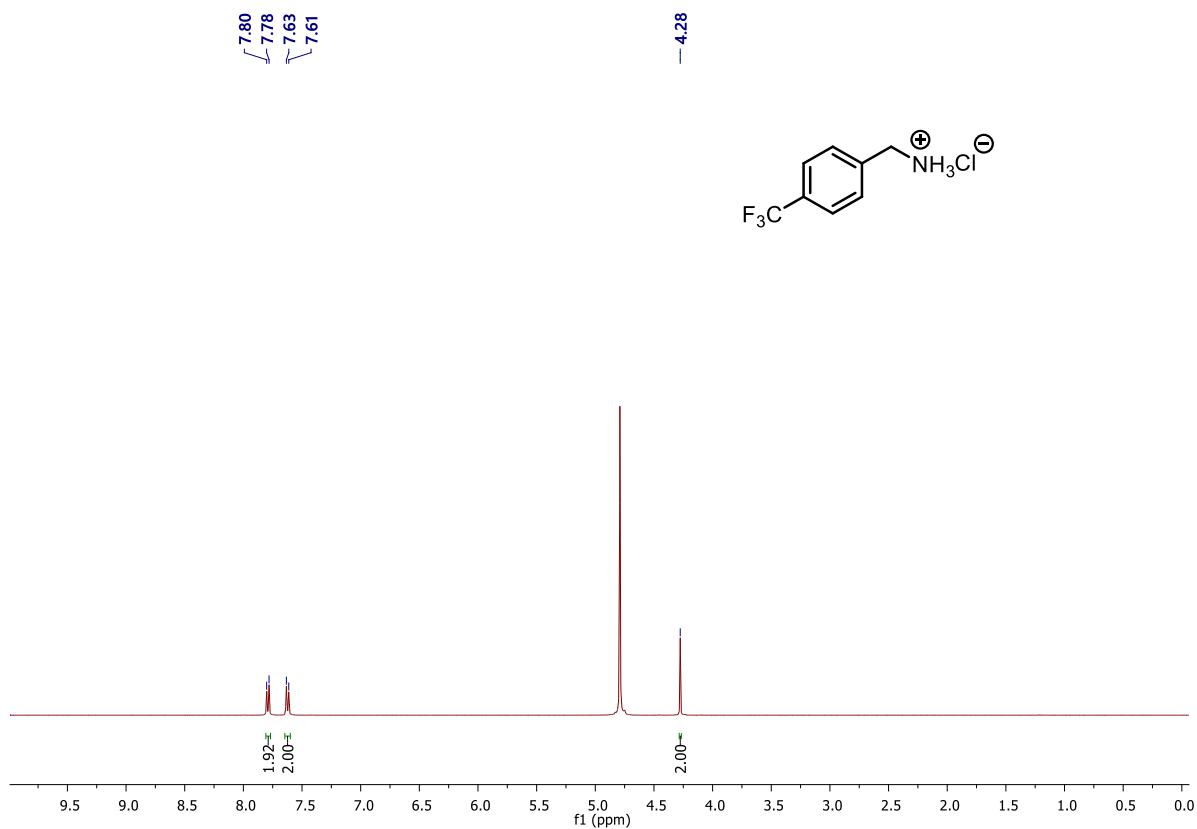

**Fig. S27**  $^1\text{H}$  NMR spectrum of **4g** in  $\text{D}_2\text{O}$ .<sup>S10</sup>



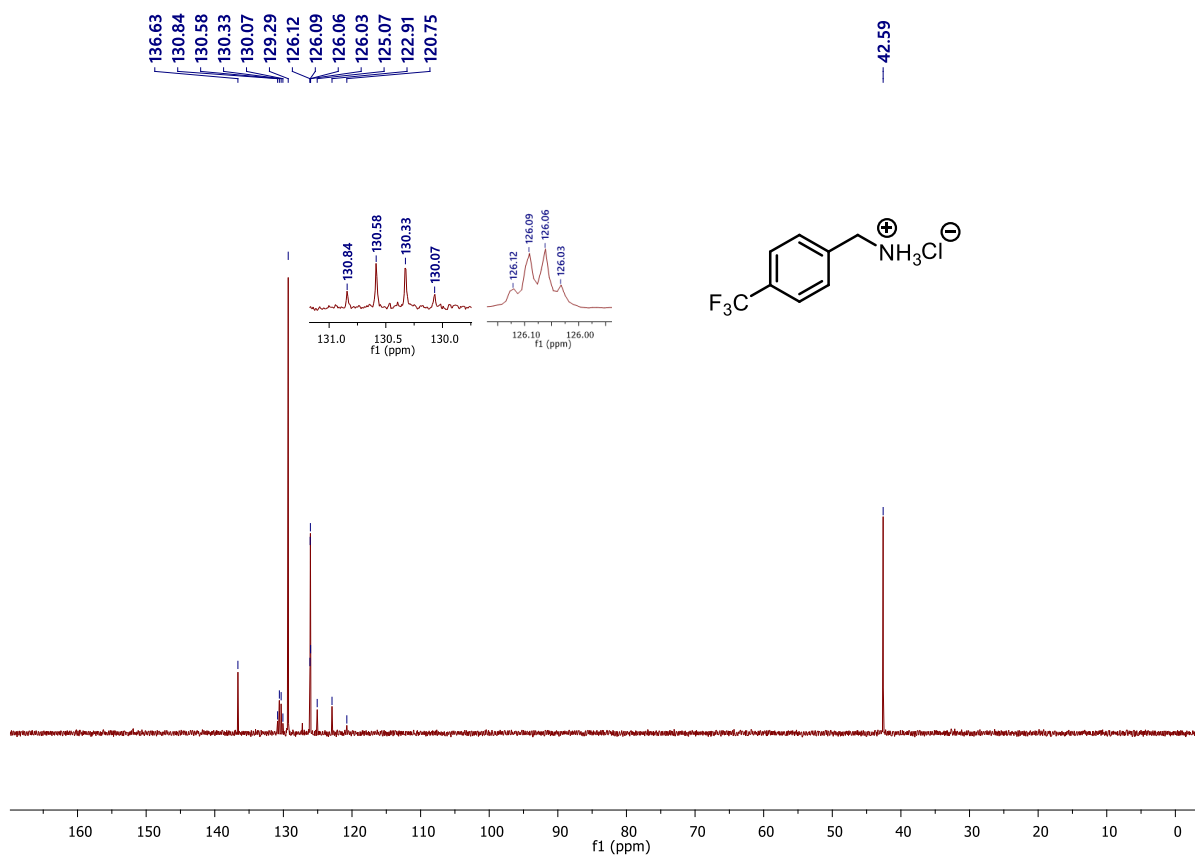

**Fig. S28**  $^{13}\text{C}\{^1\text{H}\}$  NMR spectrum of **4g** in  $\text{D}_2\text{O}$ . <sup>S10</sup>

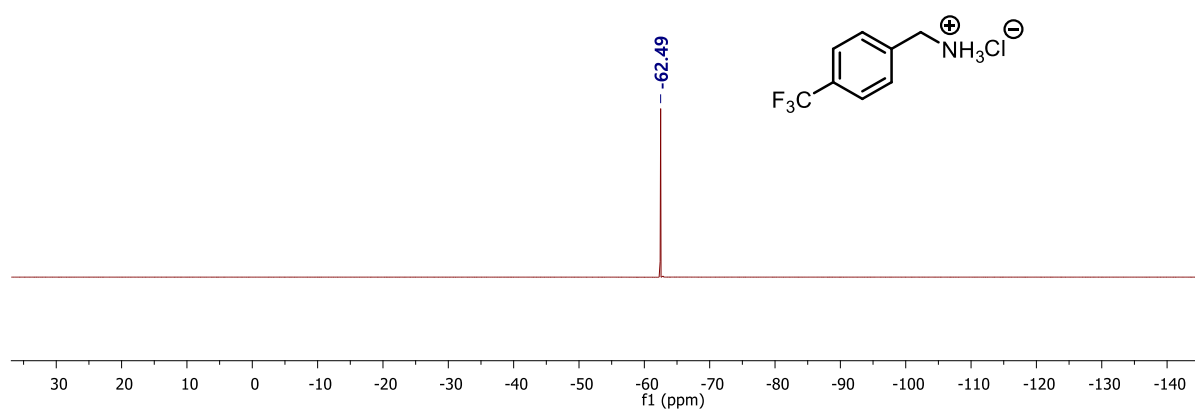

**Fig. S29**  $^{19}\text{F}\{^1\text{H}\}$  NMR spectrum of **4g** in  $\text{D}_2\text{O}$ . <sup>S26</sup>

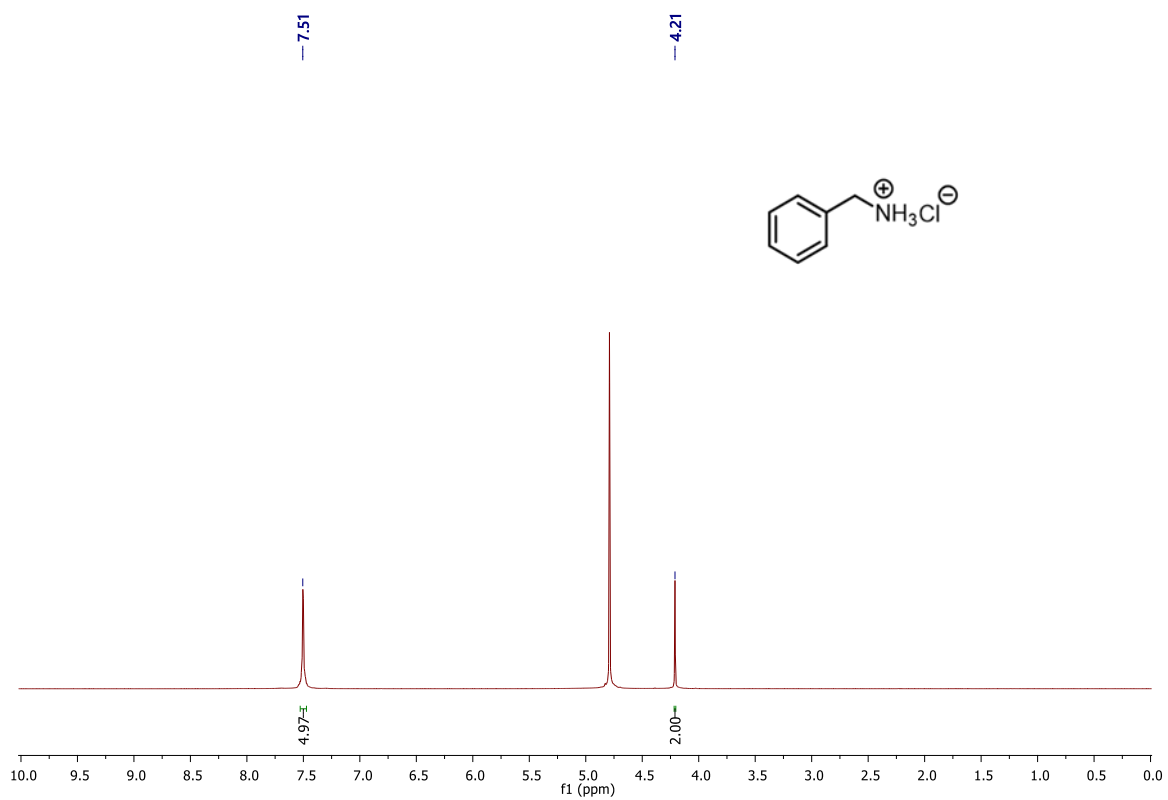

Fig. S30  $^1\text{H}$  NMR spectrum of **4h** in  $\text{D}_2\text{O}$ . <sup>S10</sup>

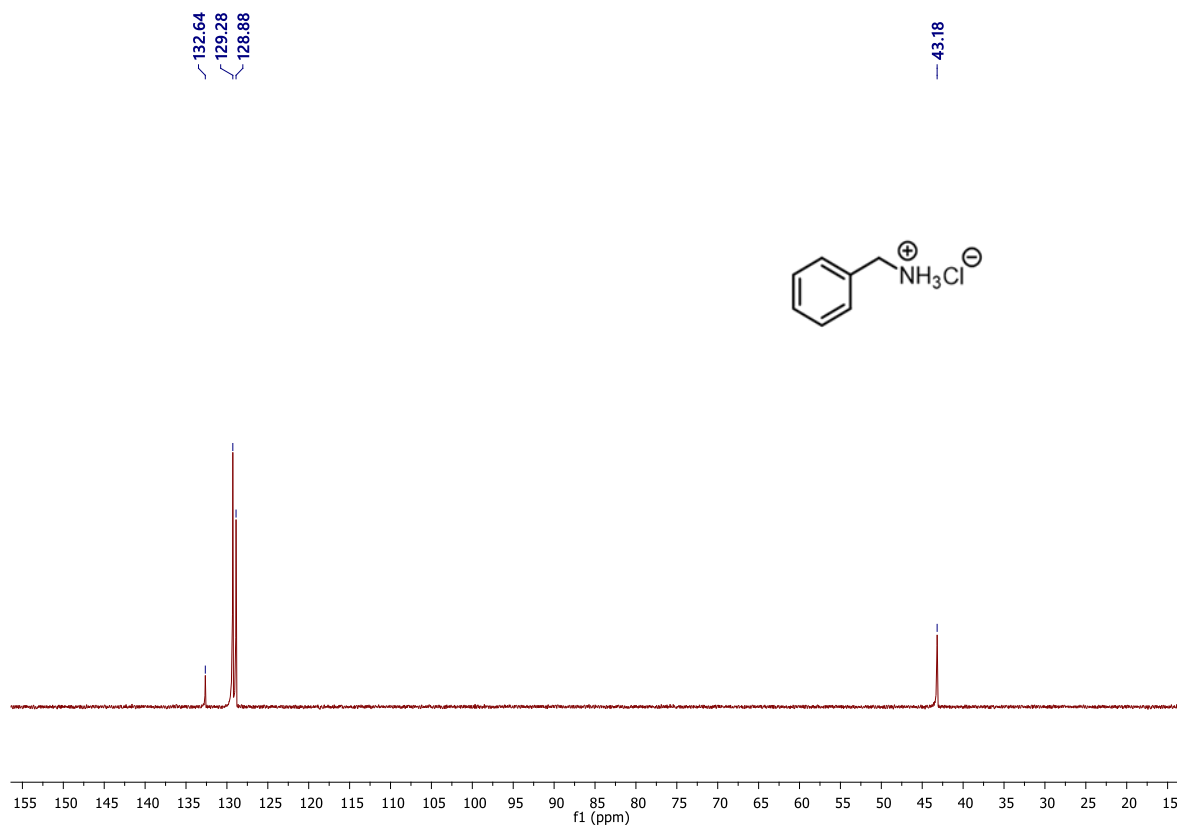

Fig. S31  $^{13}\text{C}\{^1\text{H}\}$  NMR spectrum of **4h** in  $\text{D}_2\text{O}$ . <sup>S10</sup>

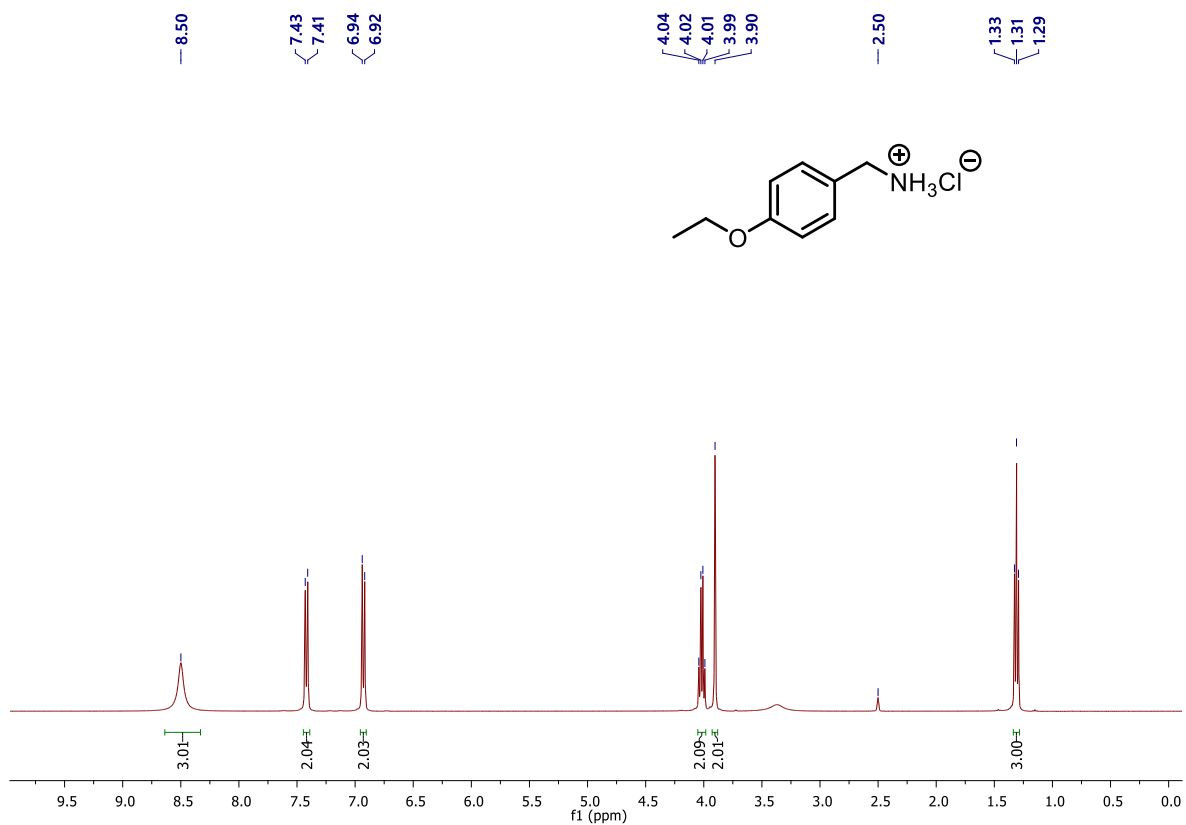

**Fig. S32**  $^1\text{H}$  NMR spectrum of **4i** in  $\text{DMSO-d}_6$ .<sup>S12</sup>

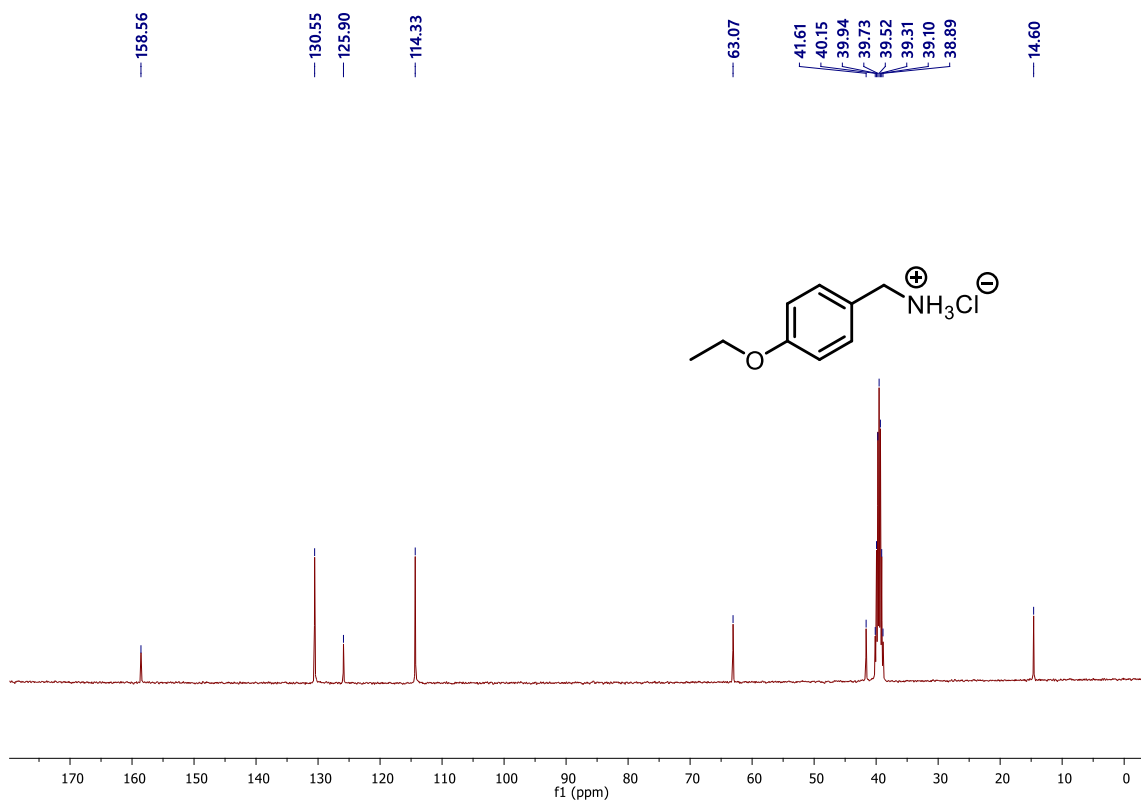

**Fig. S33**  $^{13}\text{C}\{^1\text{H}\}$  NMR spectrum of **4i** in  $\text{DMSO-d}_6$ .<sup>S12</sup>

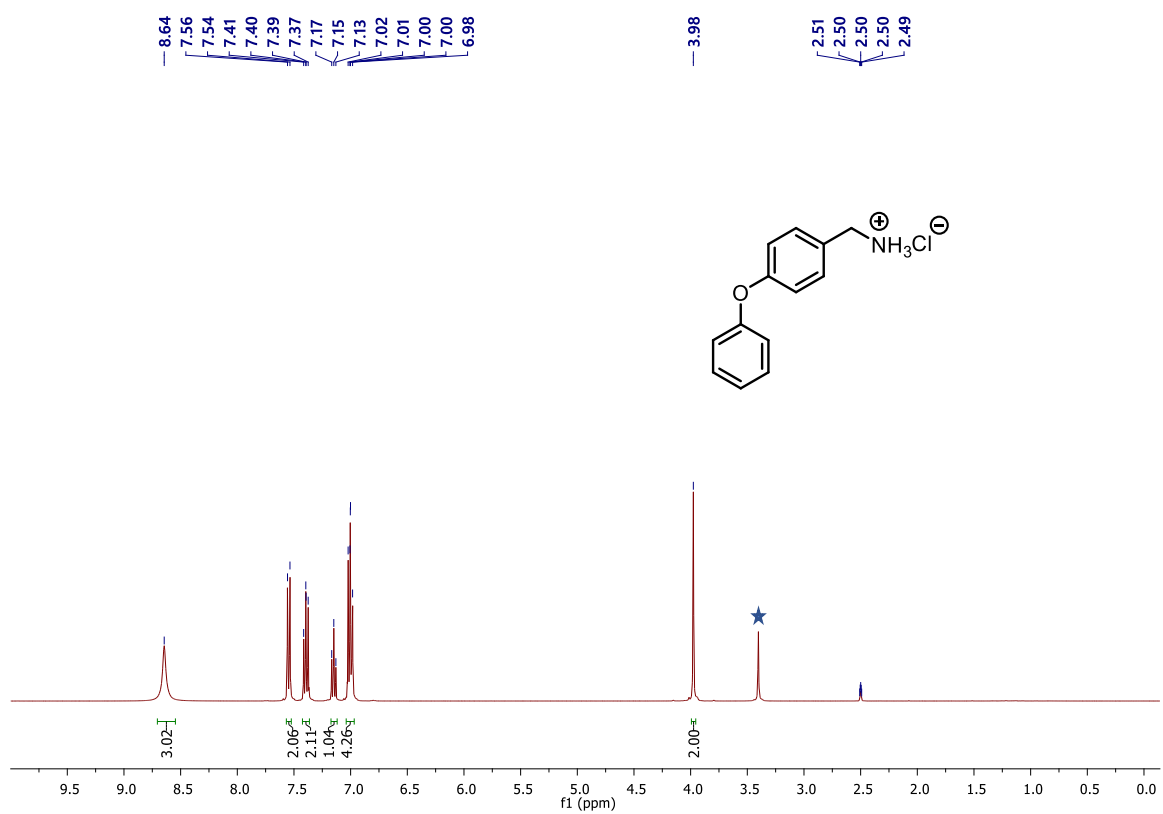

**Fig. S34**  $^1\text{H}$  NMR spectrum of **4j** in  $\text{DMSO-d}_6$ . ★ denotes moisture peak in  $\text{DMSO-d}_6$ . <sup>S13</sup>

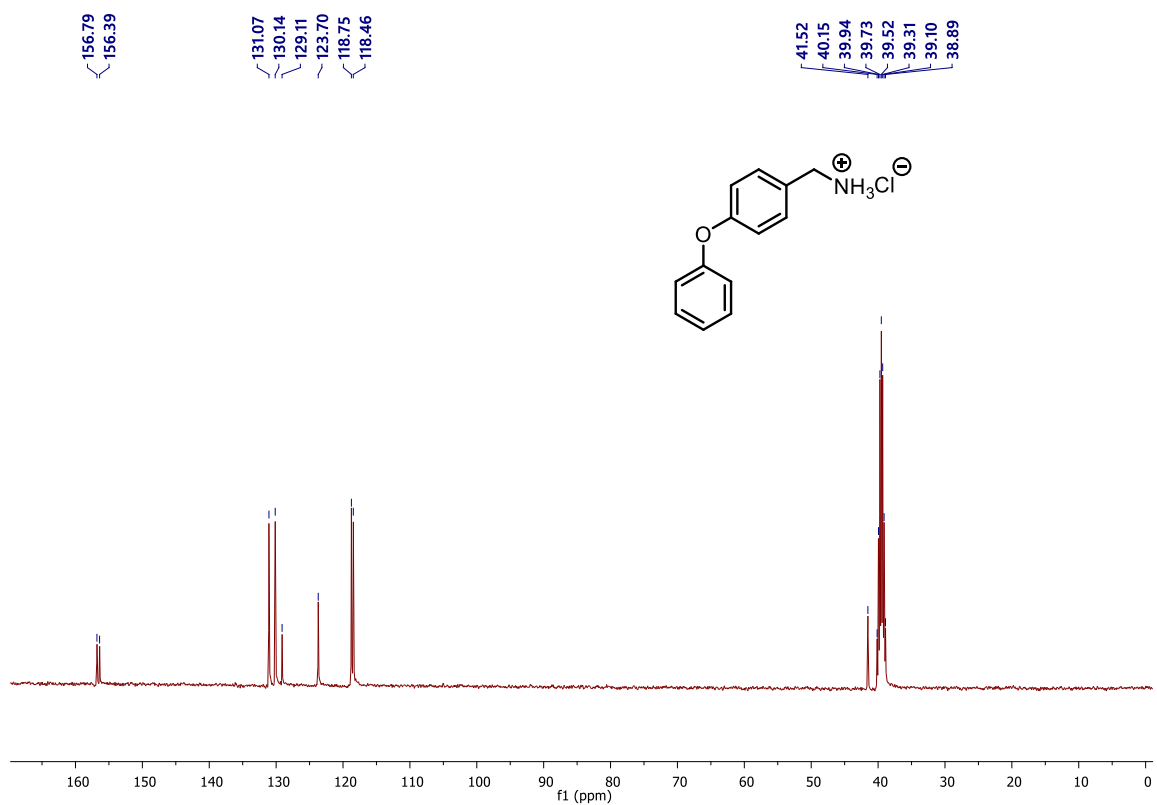

**Fig. S35**  $^{13}\text{C}\{^1\text{H}\}$  NMR spectrum of **4j** in  $\text{DMSO-d}_6$ . <sup>S13</sup>

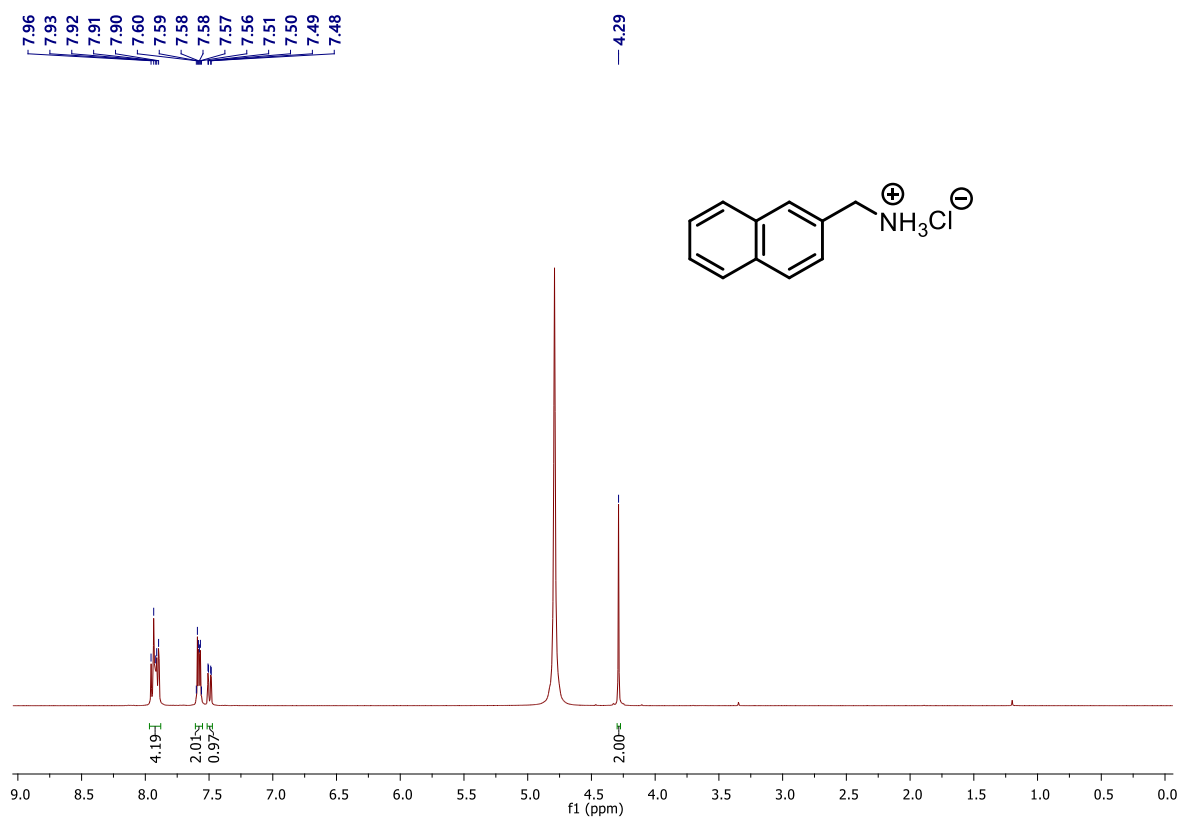

**Fig. S36**  $^1\text{H}$  NMR spectrum of **4k** in  $\text{D}_2\text{O}$ . <sup>S10</sup>

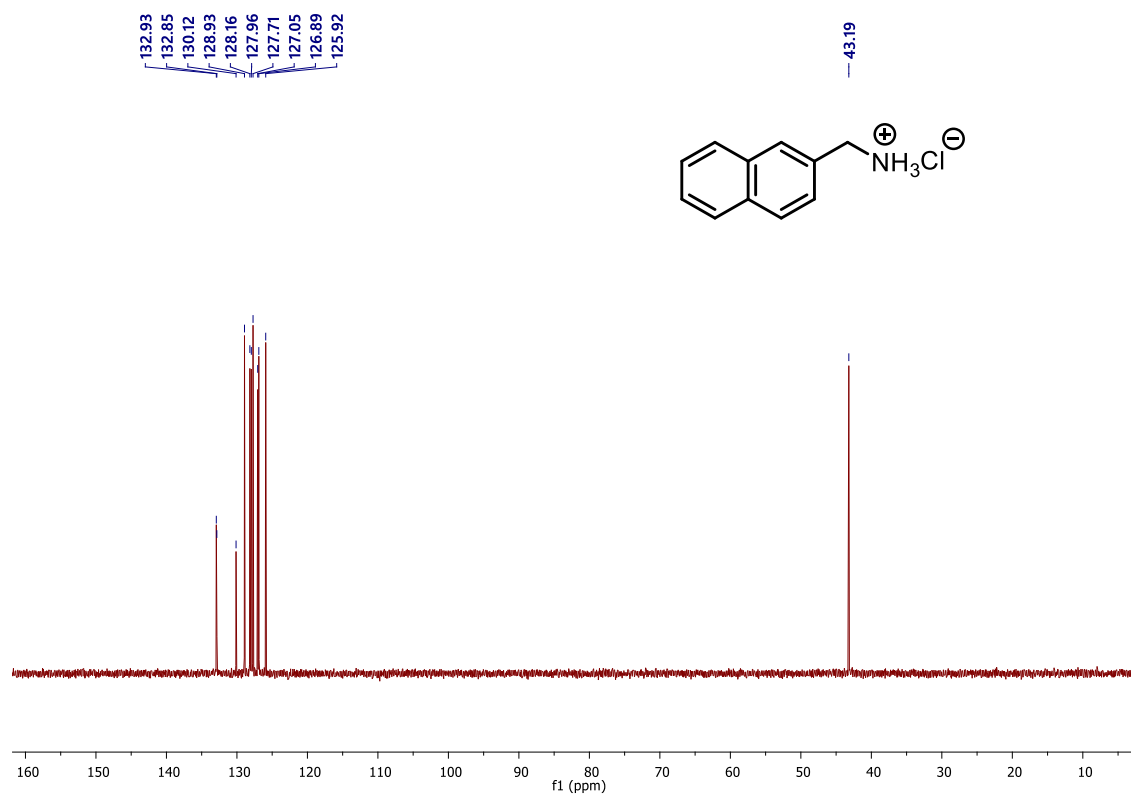

**Fig. S37**  $^{13}\text{C}\{^1\text{H}\}$  NMR spectrum of **4k** in  $\text{D}_2\text{O}$ . <sup>S10</sup>

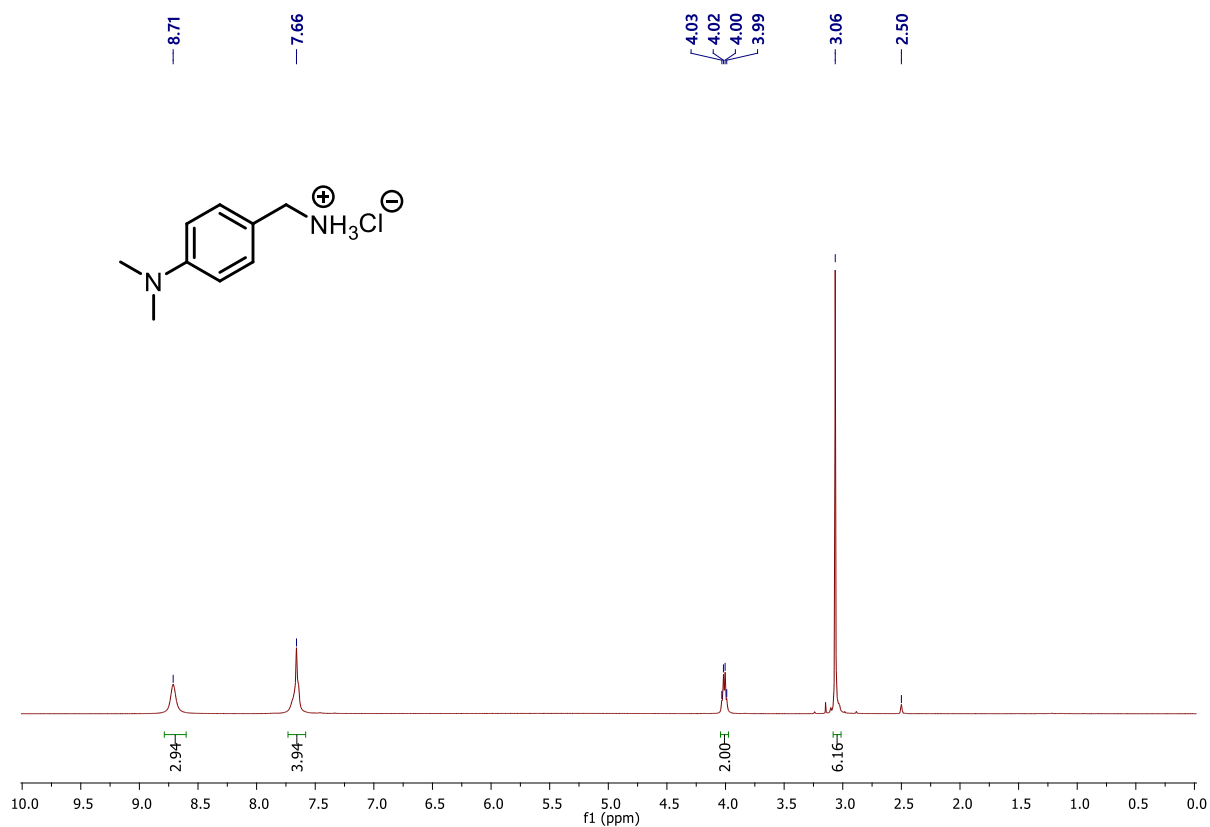

**Fig. S38**  $^1\text{H}$  NMR spectrum of **4I** in  $\text{DMSO-d}_6$ .<sup>S14</sup>

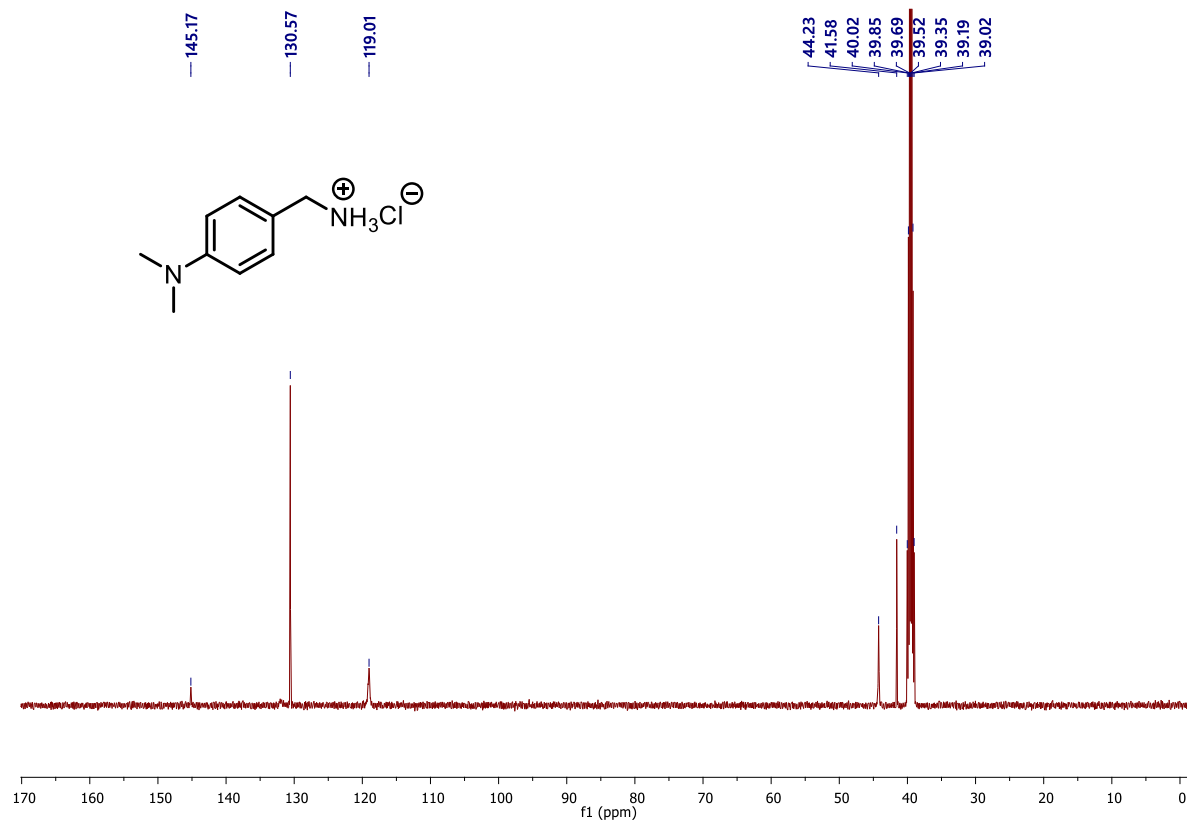

**Fig. S39**  $^{13}\text{C}\{^1\text{H}\}$  NMR spectrum of **4I** in  $\text{DMSO-d}_6$ .<sup>S14</sup>

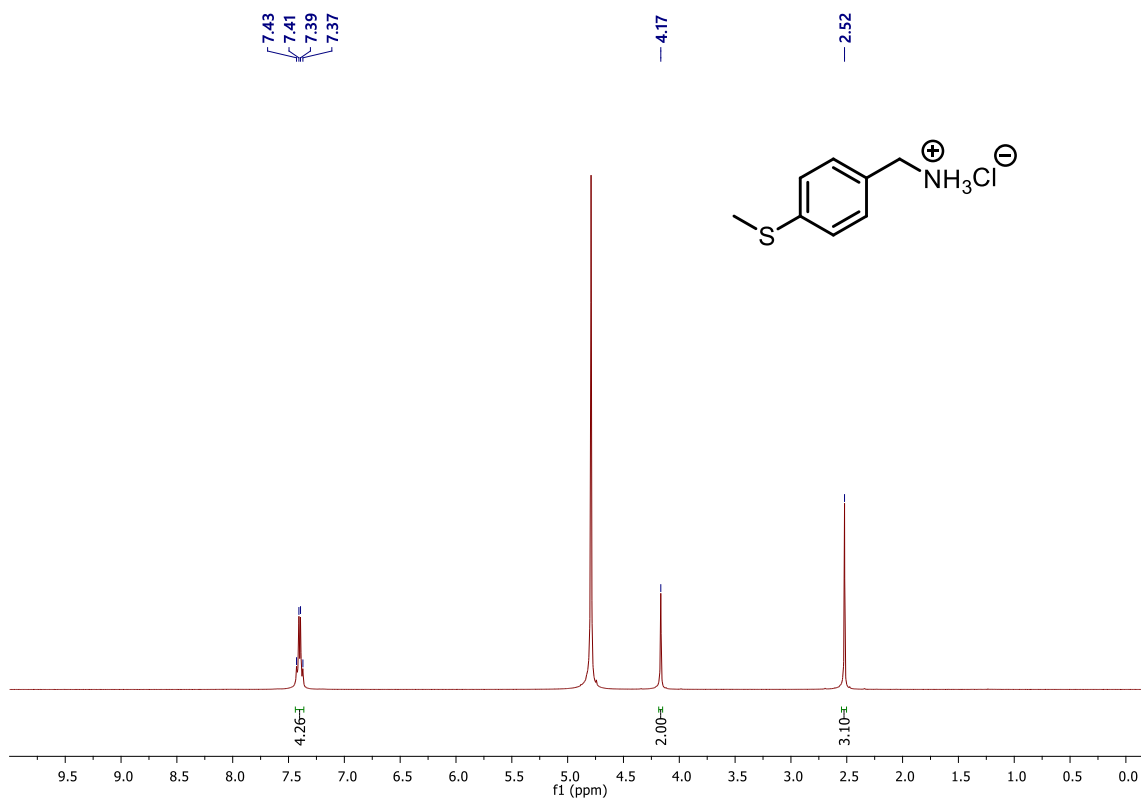

Fig. S40  $^1\text{H}$  NMR spectrum of **4m** in  $\text{D}_2\text{O}$ . <sup>S15</sup>

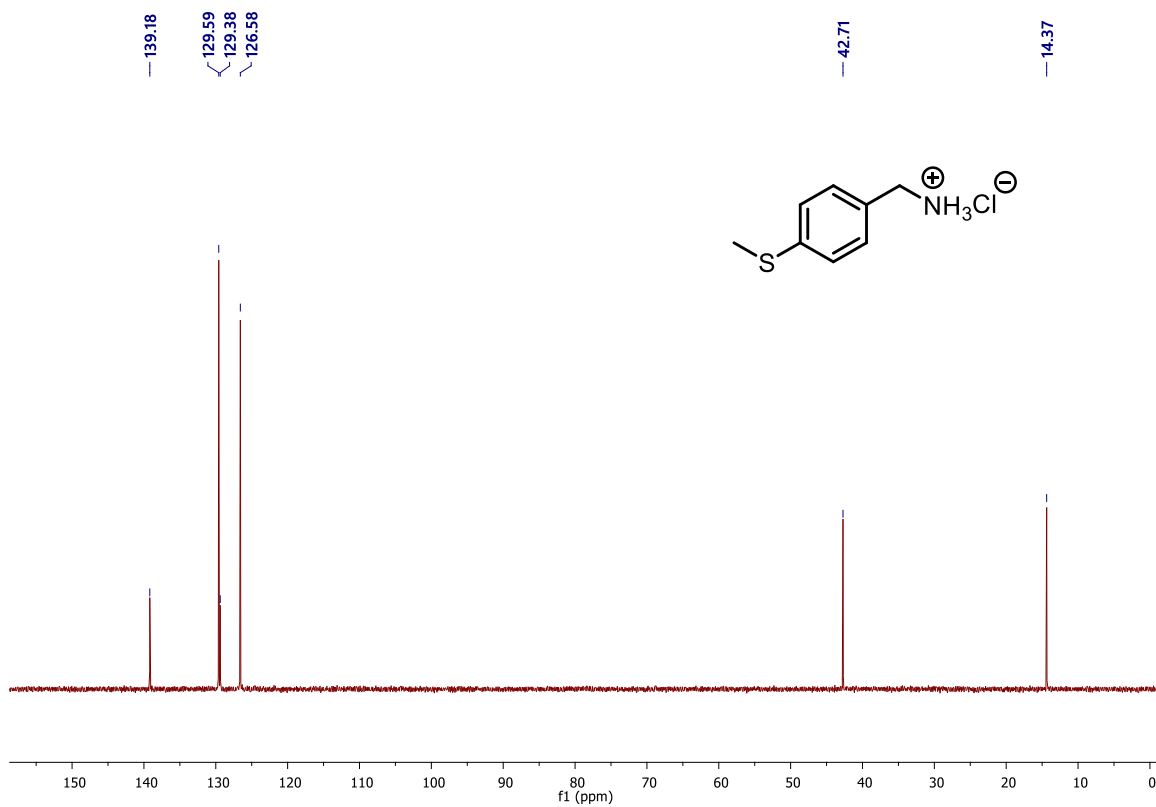

Fig. S41  $^{13}\text{C}\{^1\text{H}\}$  NMR spectrum of **4m** in  $\text{D}_2\text{O}$ . <sup>S15</sup>

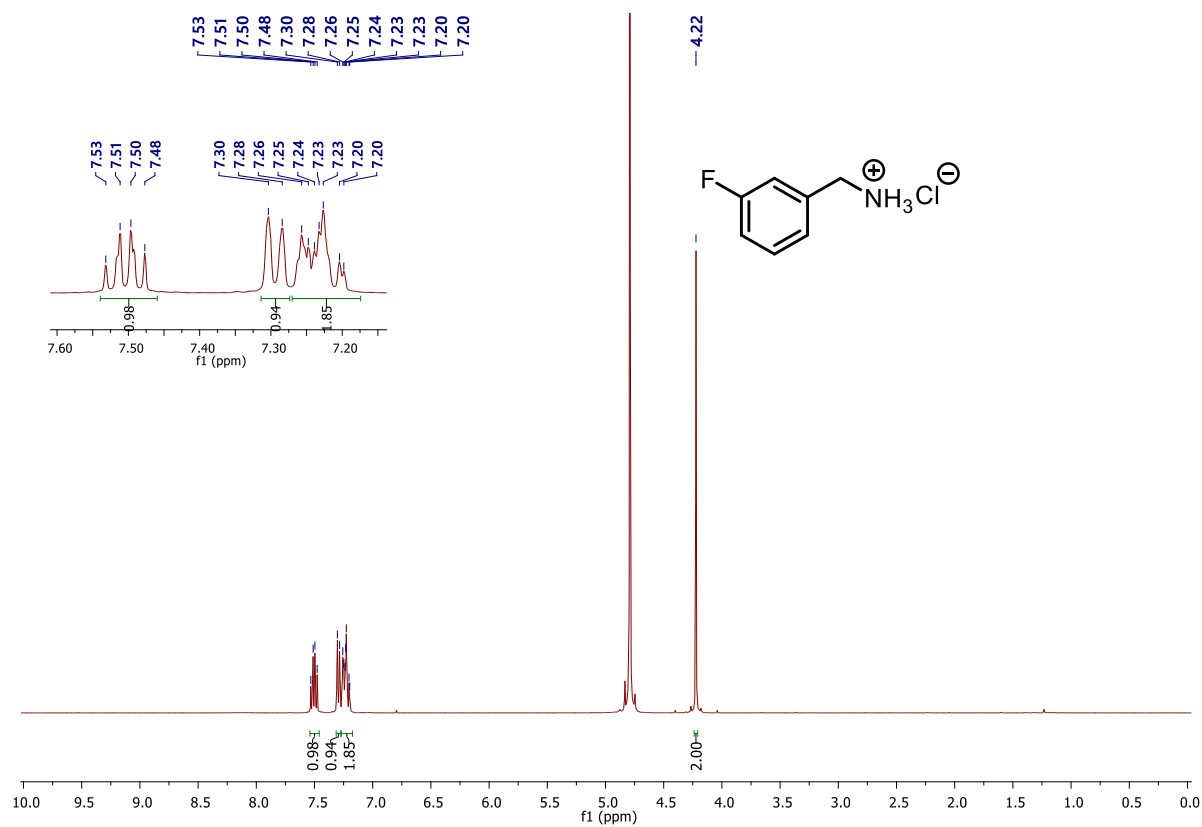

Fig. S42  $^1\text{H}$  NMR spectrum of **4n** in  $\text{D}_2\text{O}$ .<sup>S9</sup>

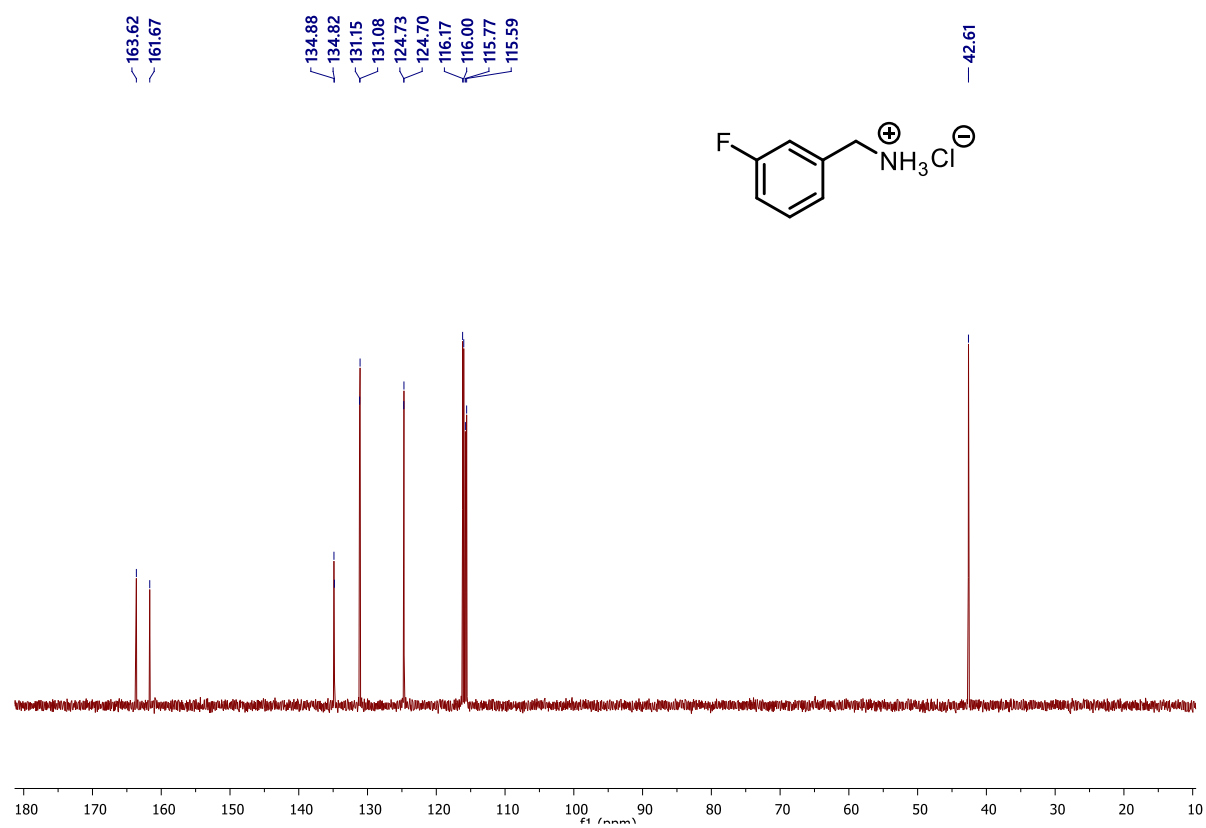

Fig. S43  $^{13}\text{C}\{^1\text{H}\}$  NMR spectrum of **4n** in  $\text{D}_2\text{O}$ .<sup>S9</sup>



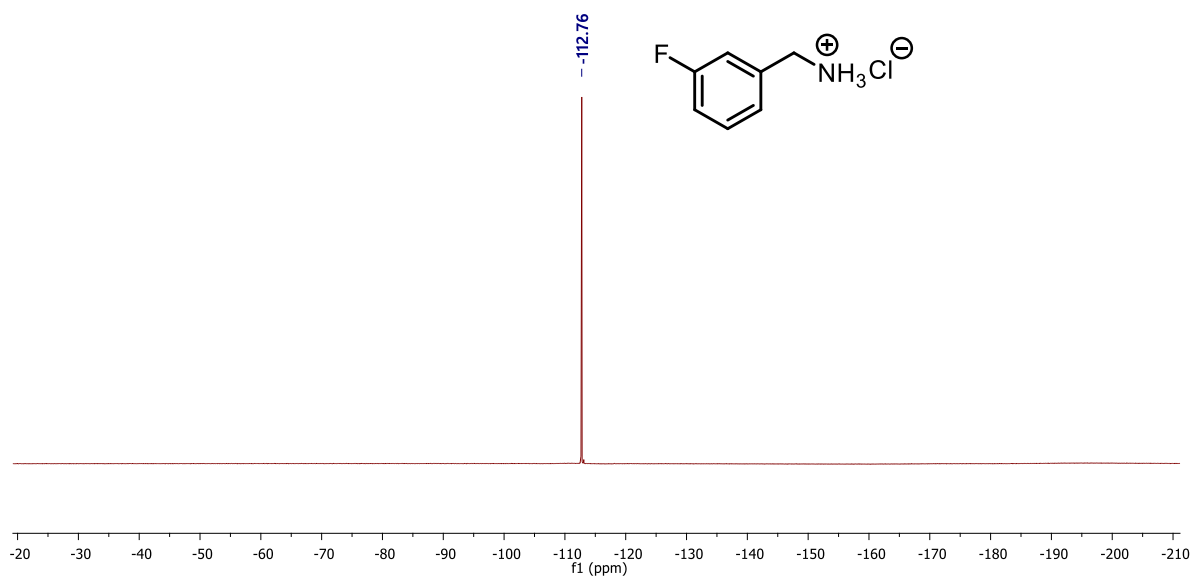

Fig. S44  $^{19}\text{F}\{^1\text{H}\}$  NMR spectrum of **4n** in  $\text{D}_2\text{O}$ . <sup>S28</sup>

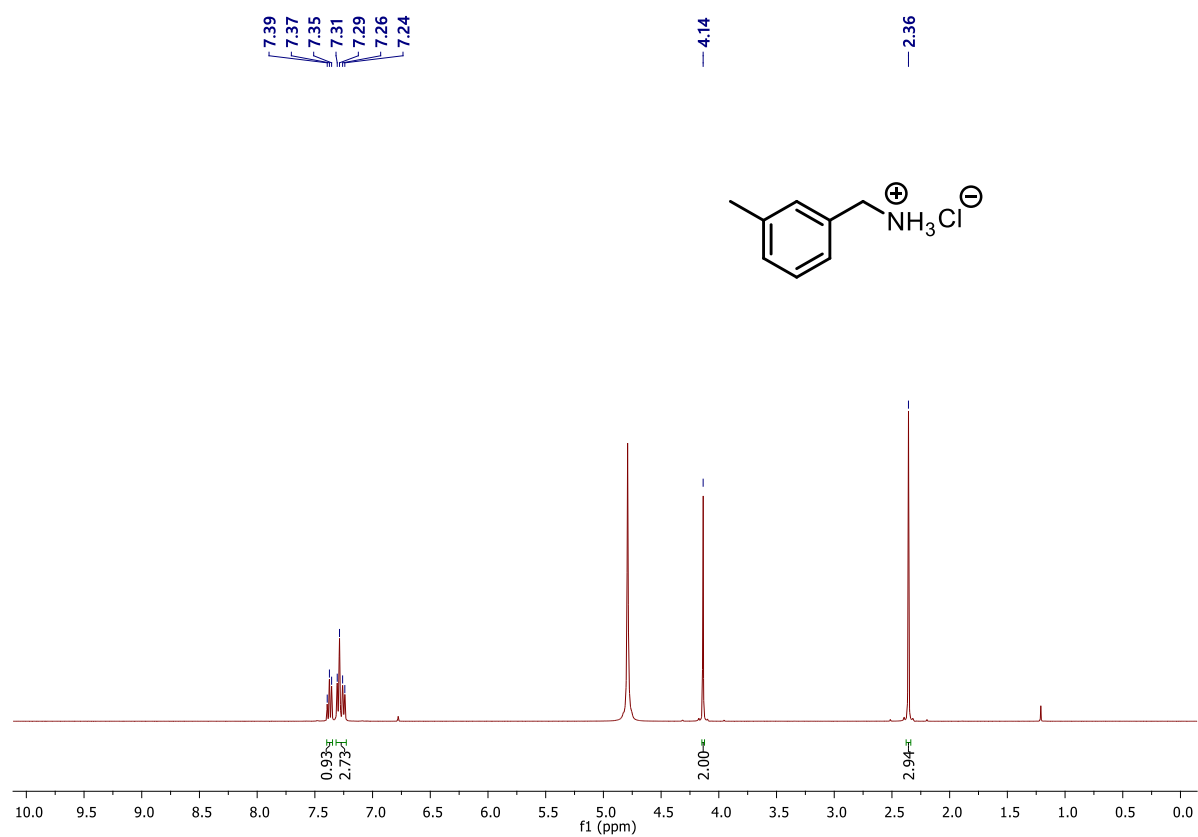

Fig. S45  $^1\text{H}$  NMR spectrum of **4o** in  $\text{D}_2\text{O}$ . <sup>S9</sup>

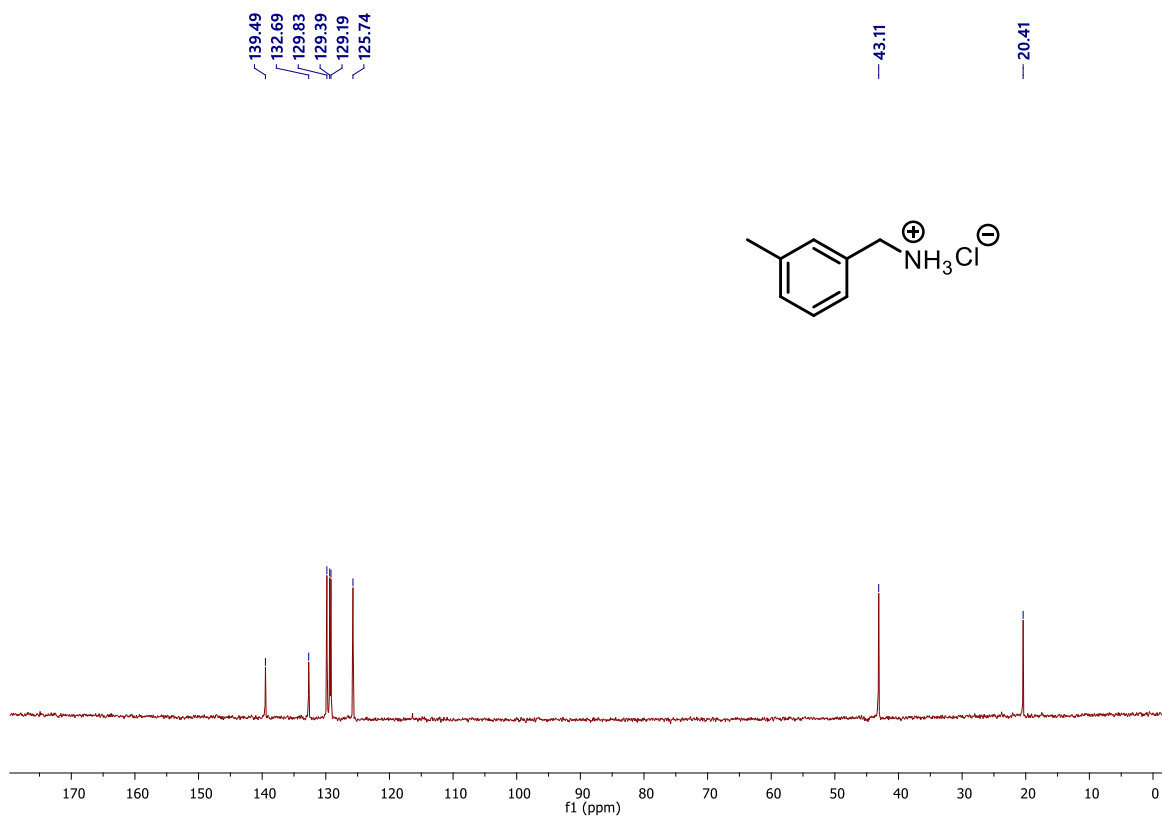

Fig. S46  $^{13}\text{C}\{^1\text{H}\}$  NMR spectrum of **4o** in  $\text{D}_2\text{O}$ .<sup>S9</sup>

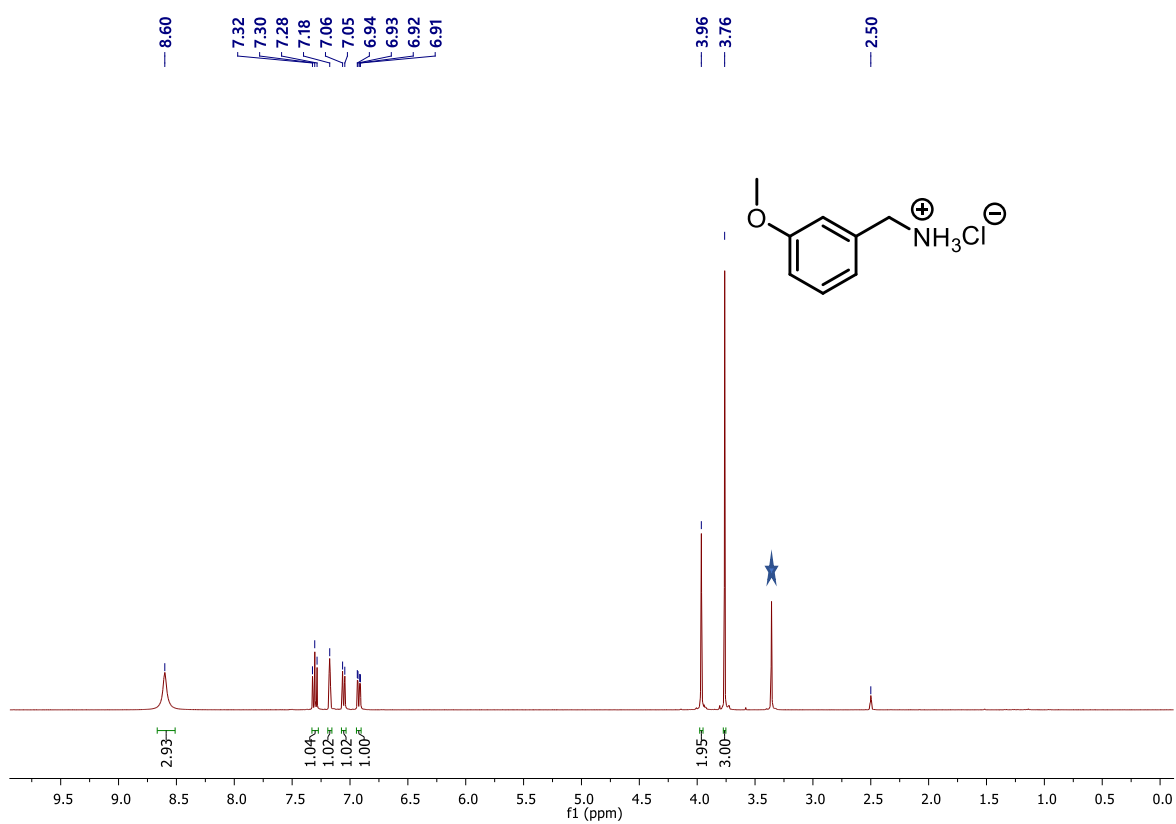

Fig. S47  $^1\text{H}$  NMR spectrum of **4p** in  $\text{DMSO-d}_6$ .<sup>S9</sup> ★ denotes moisture peak in  $\text{DMSO-d}_6$ .

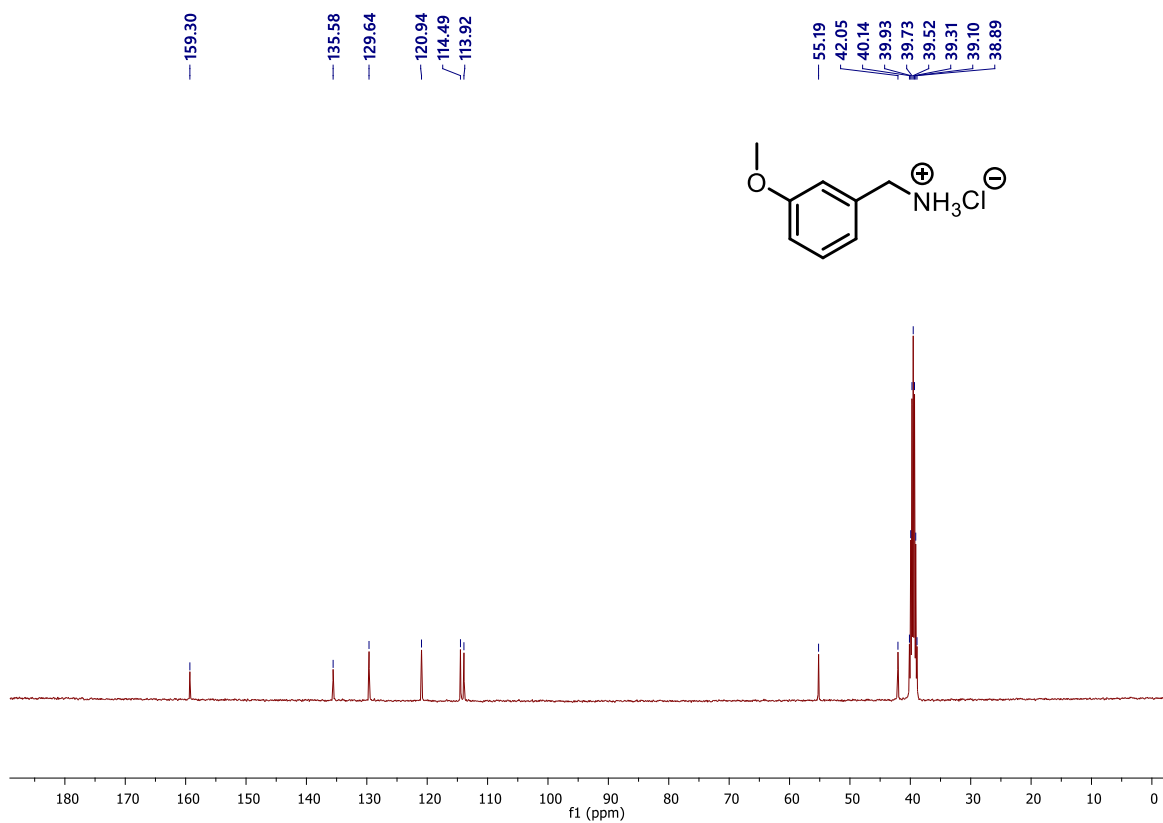

**Fig. S48**  $^{13}\text{C}\{^1\text{H}\}$  NMR spectrum of **4p** in DMSO- $d_6$ . <sup>S9</sup>

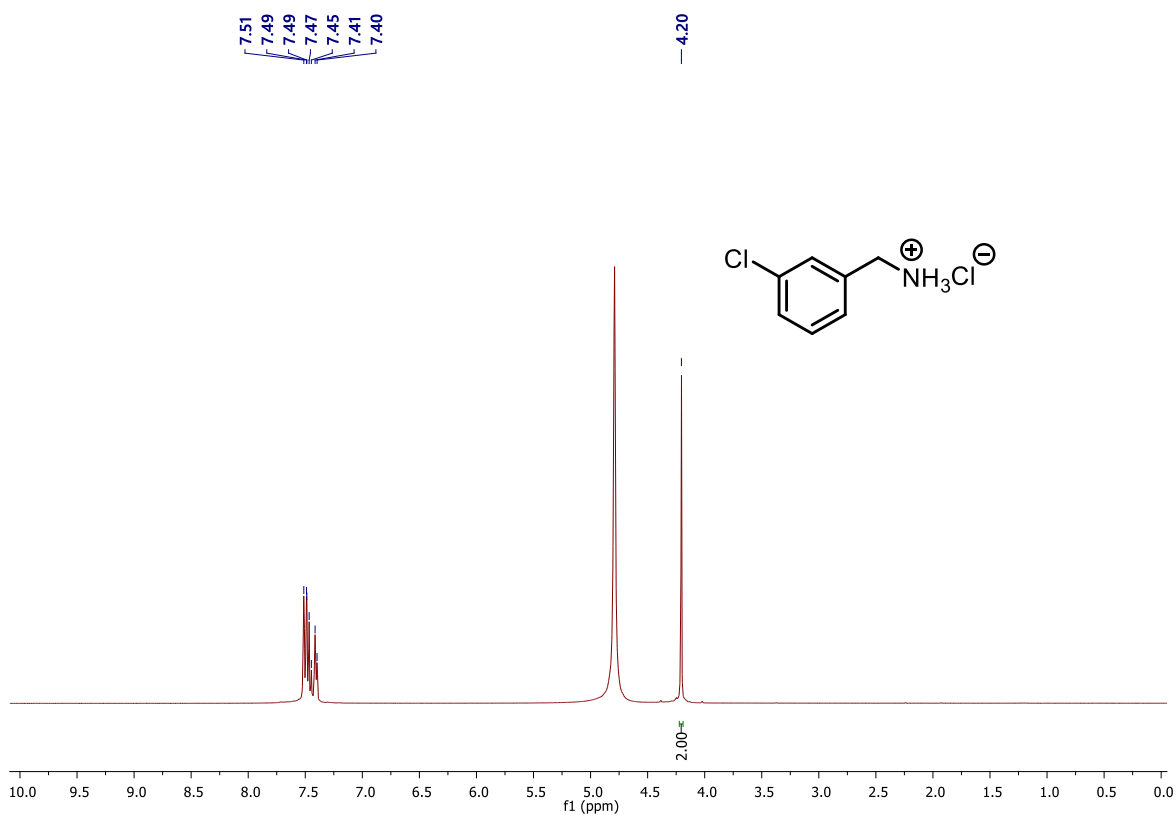

**Fig. S49**  $^1\text{H}$  NMR spectrum of **4q** in  $\text{D}_2\text{O}$ . <sup>S10</sup>

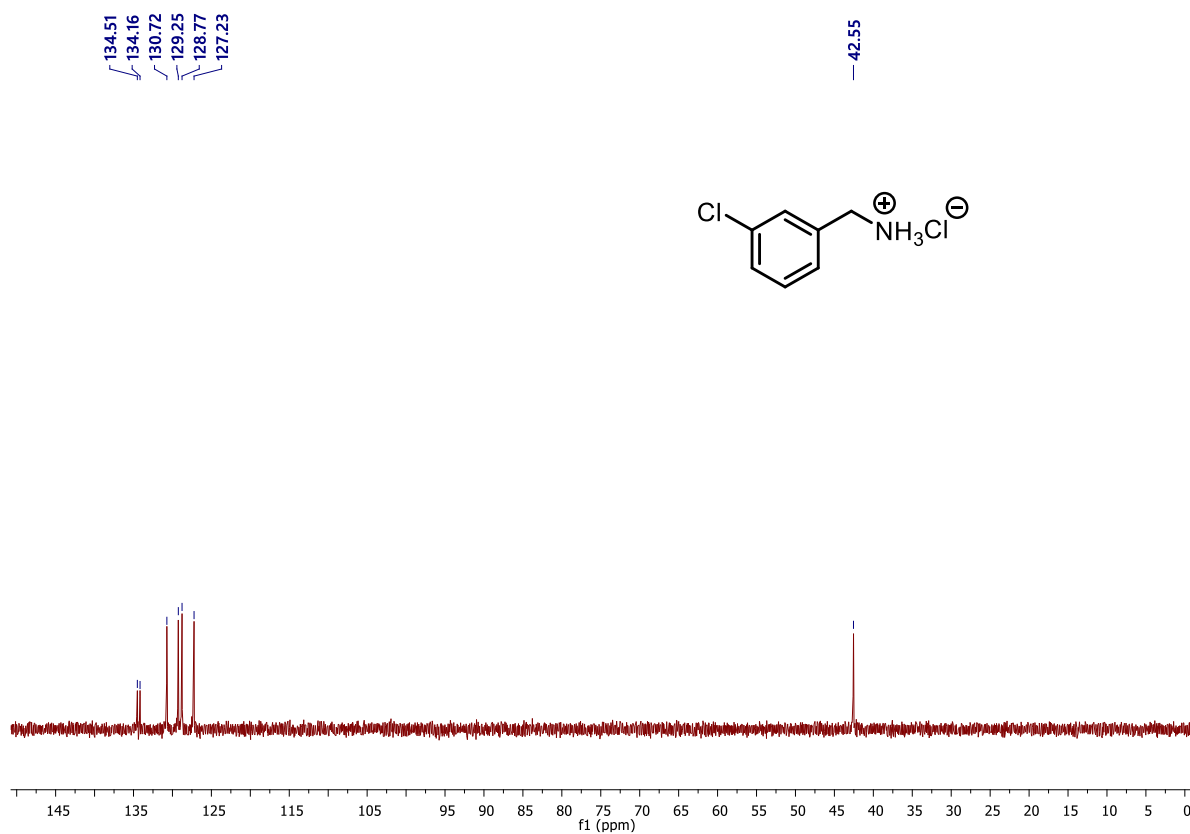

Fig. S50  $^{13}\text{C}\{^1\text{H}\}$  NMR spectrum of 4q in  $\text{D}_2\text{O}$ . <sup>S10</sup>

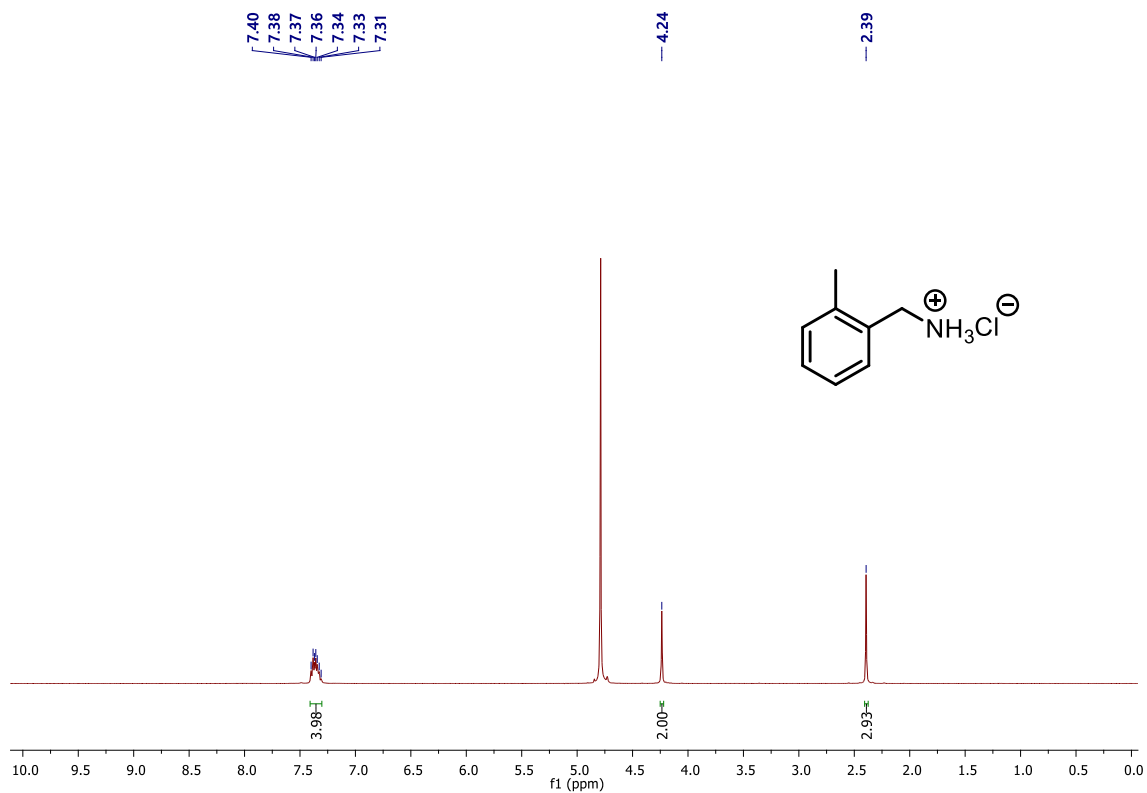

Fig. S51  $^1\text{H}$  NMR spectrum of 4r in  $\text{D}_2\text{O}$ . <sup>S10</sup>

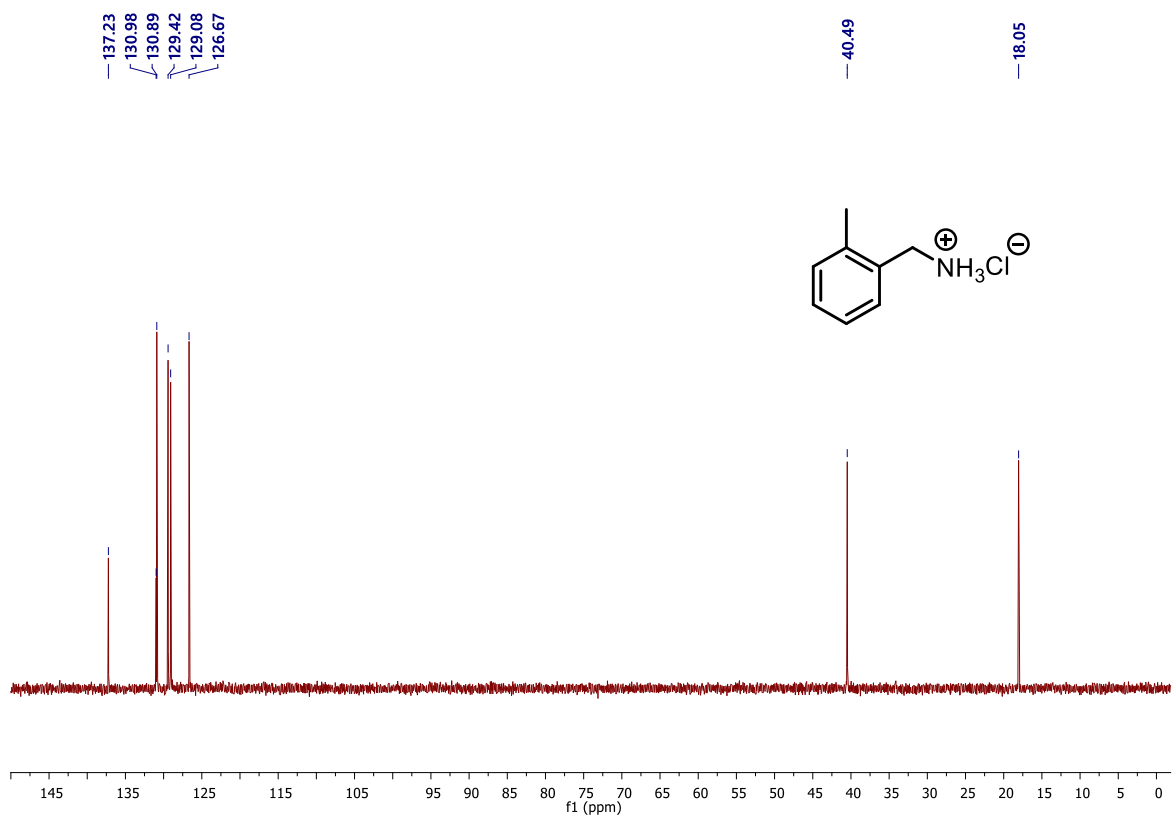

Fig. S52  $^{13}\text{C}\{^1\text{H}\}$  NMR spectrum of 4r in  $\text{D}_2\text{O}$ . S10

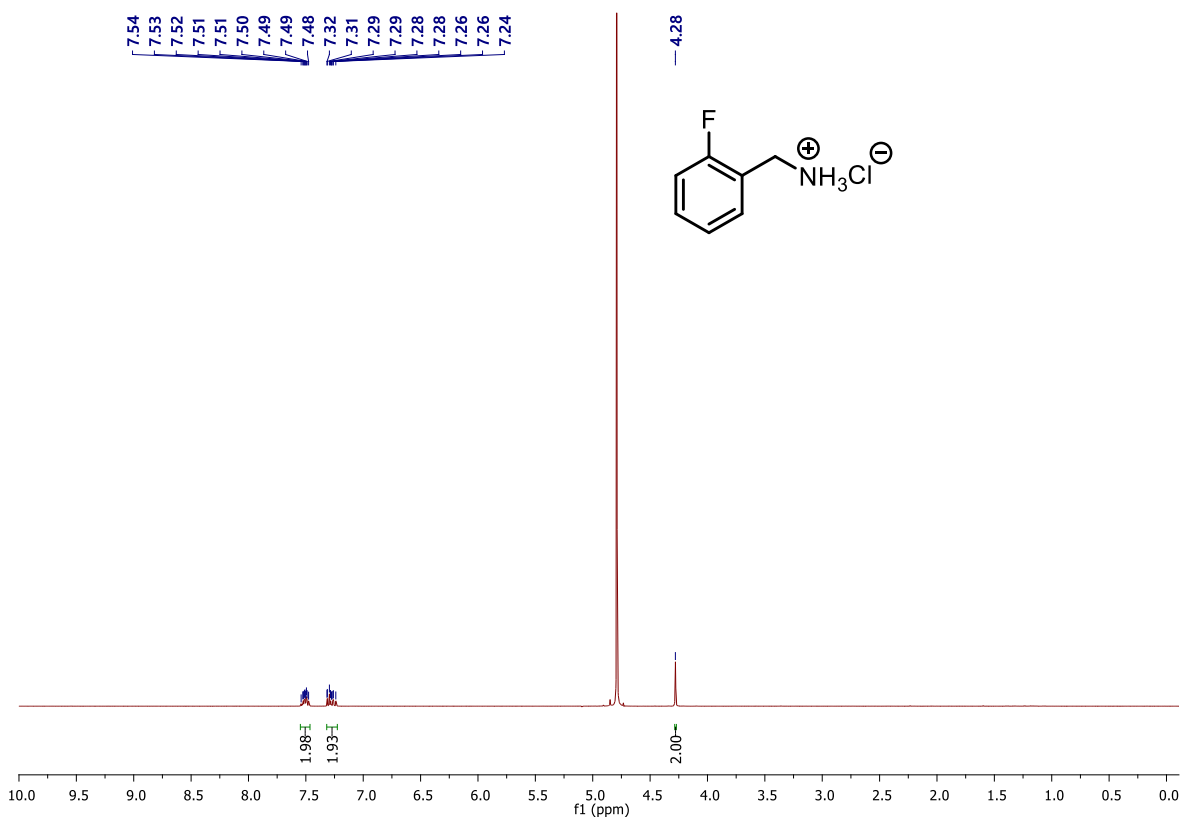

Fig. S53  $^1\text{H}$  NMR spectrum of 4s in  $\text{D}_2\text{O}$ . S16

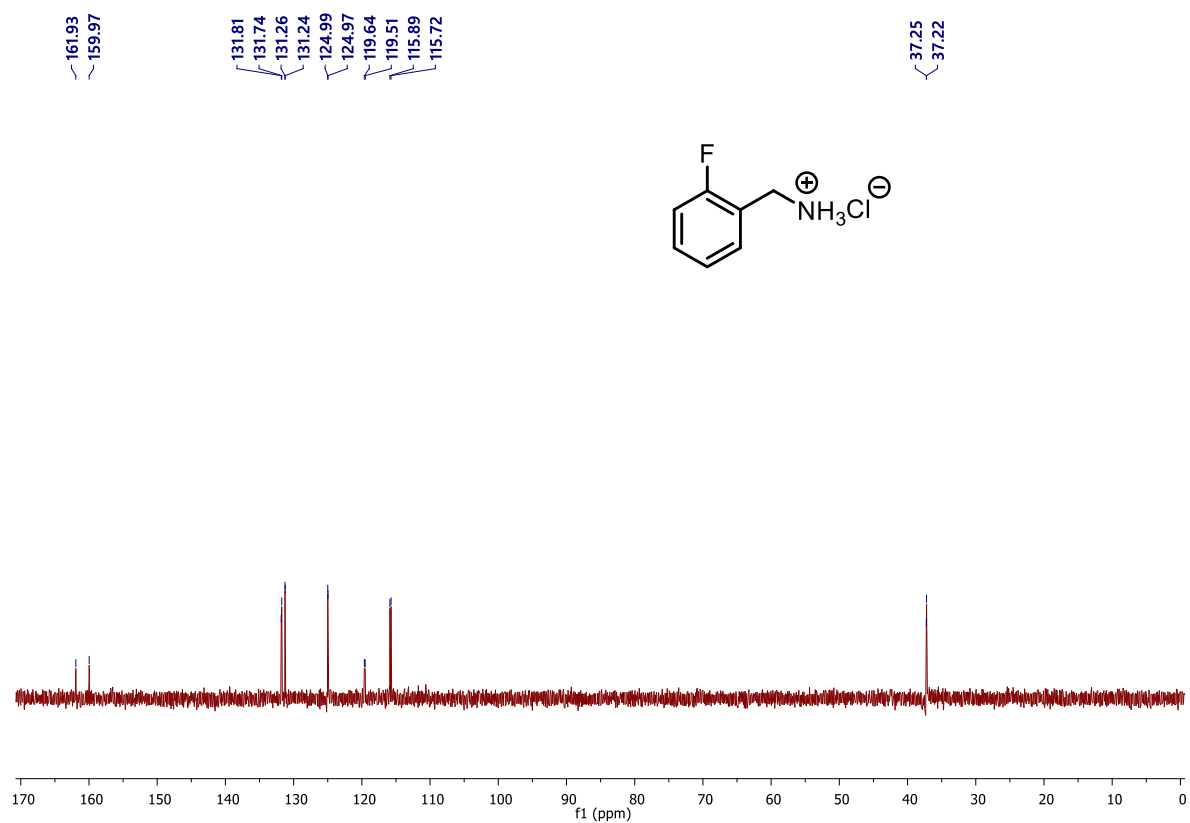

**Fig. S54**  $^{13}\text{C}\{^1\text{H}\}$  NMR spectrum of **4s** in  $\text{D}_2\text{O}$ . <sup>S16</sup>

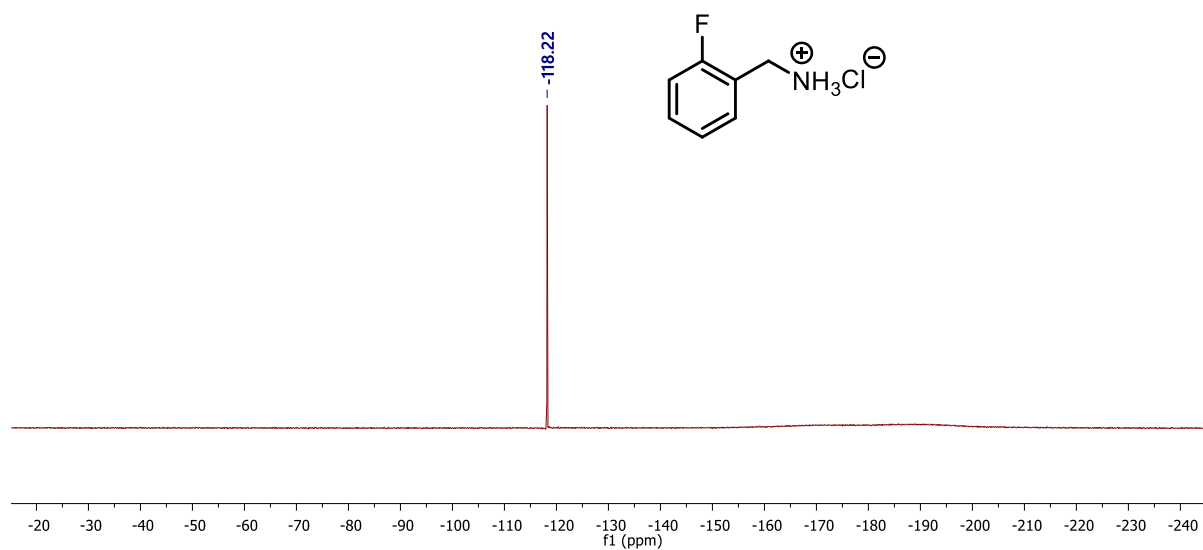

**Fig. S55**  $^{19}\text{F}\{^1\text{H}\}$  NMR spectrum of **4s** in  $\text{D}_2\text{O}$ . <sup>S28</sup>

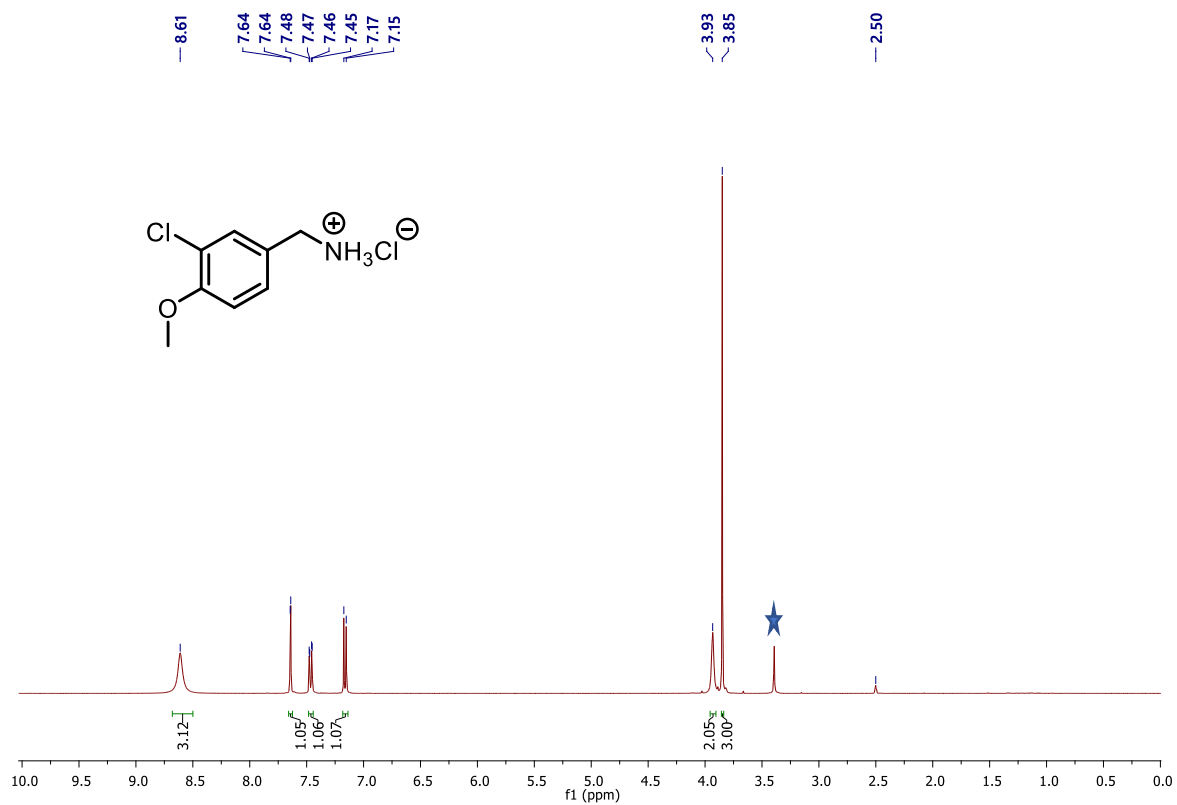

Fig. S56  $^1\text{H}$  NMR spectrum of 4t in DMSO- $d_6$ .<sup>S17</sup> ★ denotes moisture peak in DMSO- $d_6$ .

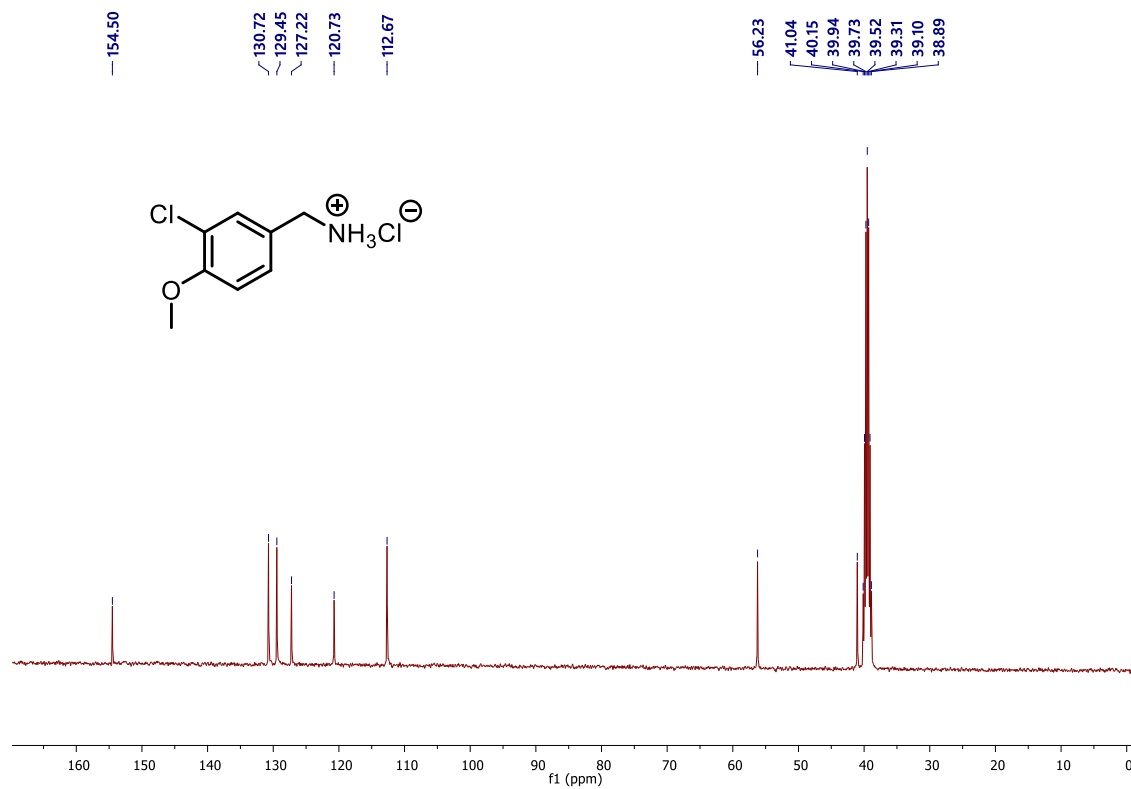

Fig. S57  $^{13}\text{C}\{^1\text{H}\}$  NMR spectrum of 4t in DMSO- $d_6$ .<sup>S17</sup>

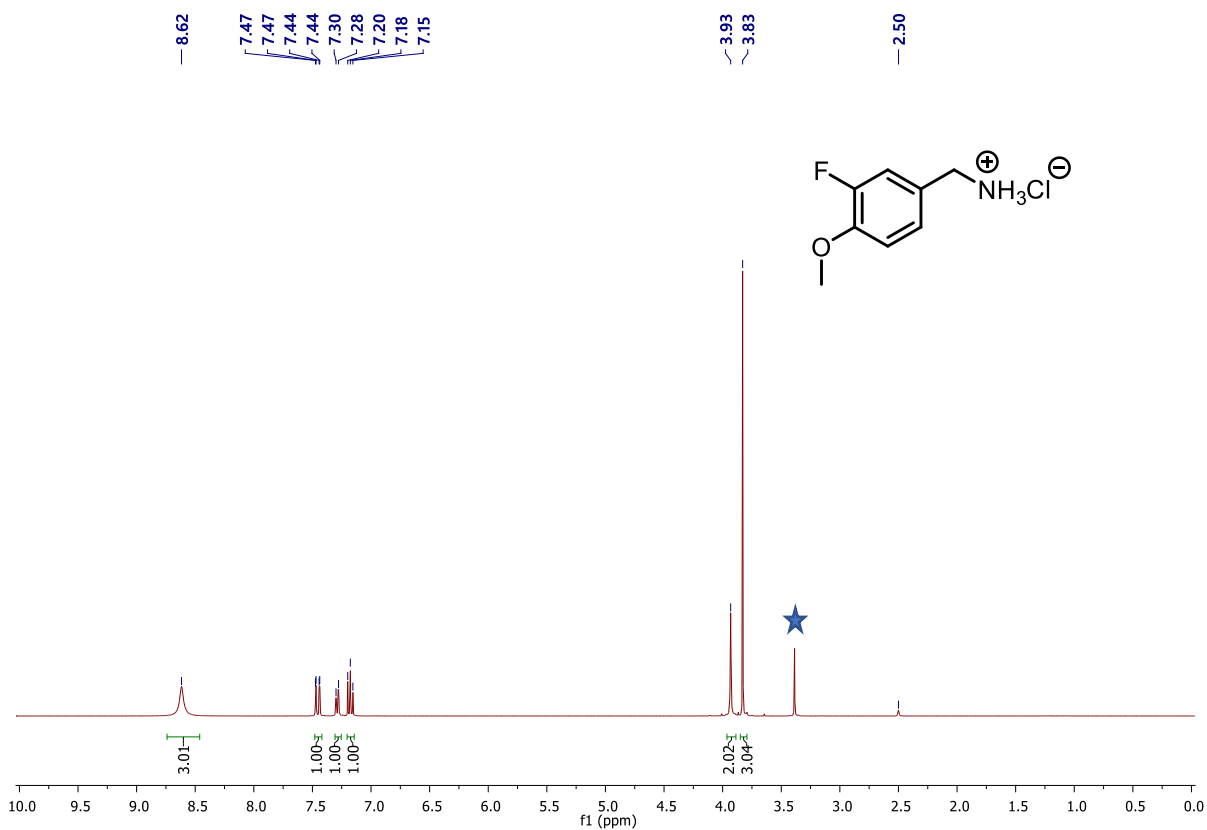

**Fig. S58**  $^1\text{H NMR}$  spectrum of **4u** in  $\text{DMSO-d}_6$ .<sup>S17</sup> ★ denotes moisture peak in  $\text{DMSO-d}_6$ .

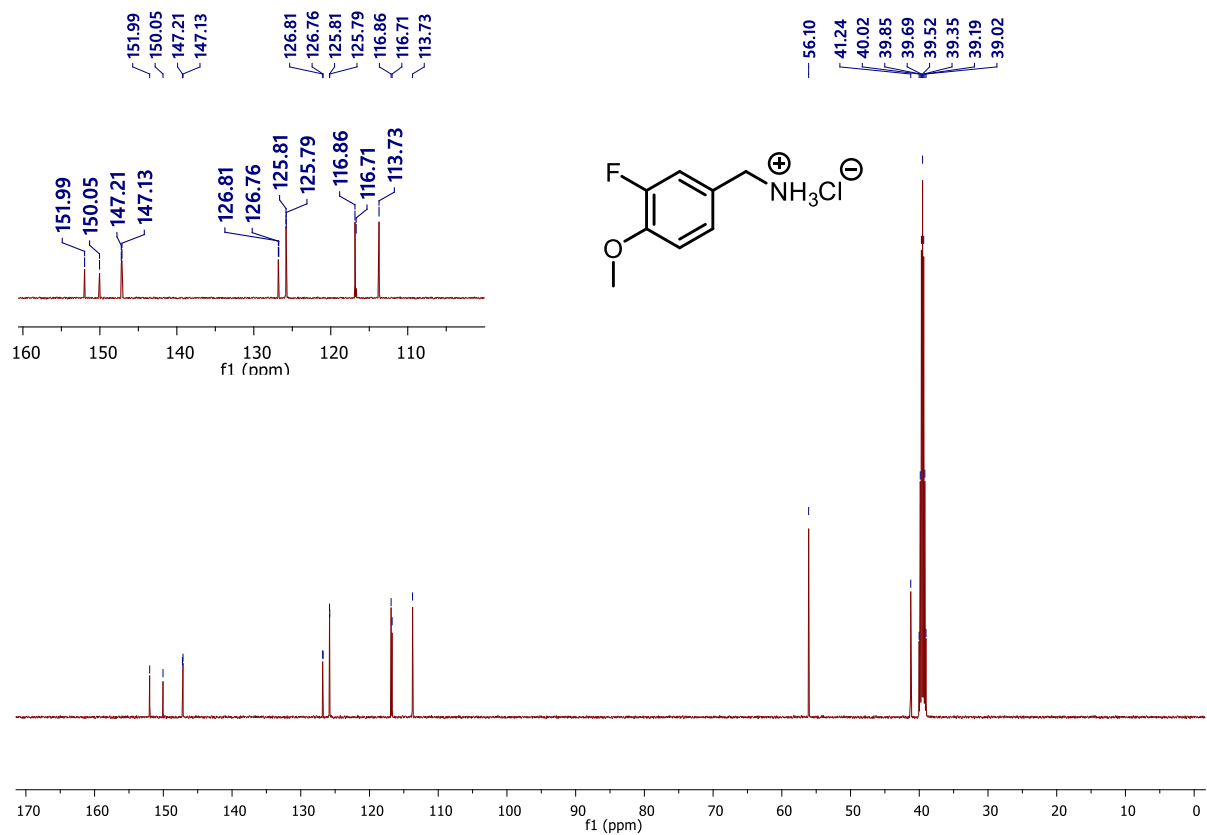

**Fig. S59**  $^{13}\text{C}\{^1\text{H}\}$  NMR spectrum of **4u** in  $\text{DMSO-d}_6$ .<sup>S17</sup>



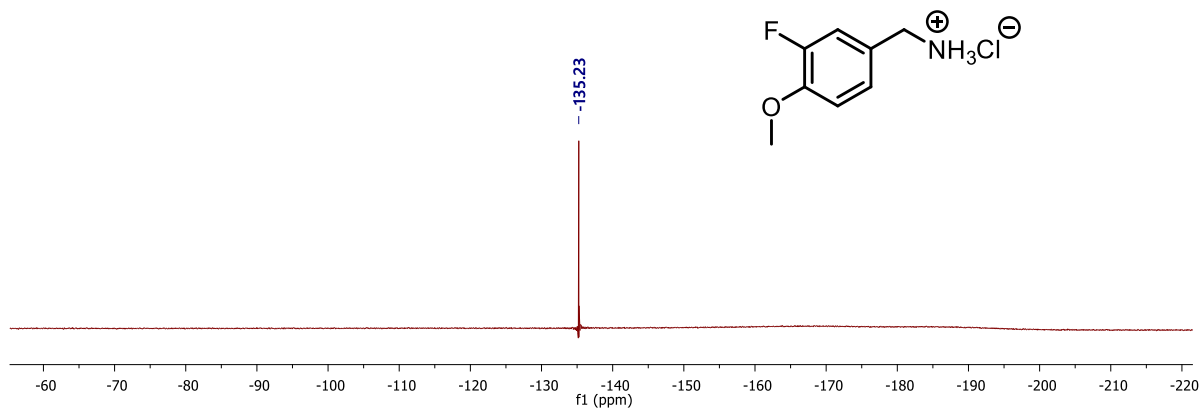

**Fig. S60**  $^{19}\text{F}\{^1\text{H}\}$  NMR spectrum of **4u** in  $\text{DMSO-d}_6$ .

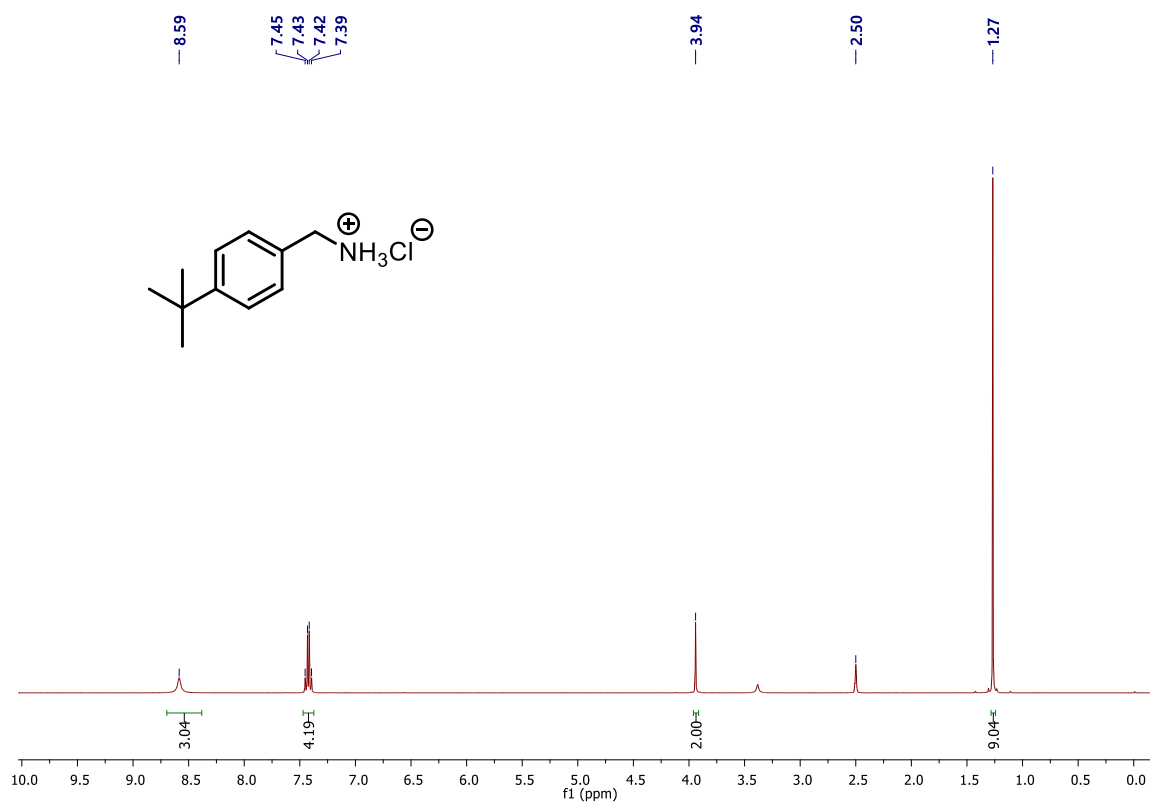

**Fig. S61**  $^1\text{H}$  NMR spectrum of **4v** in  $\text{DMSO-d}_6$ .<sup>S12</sup>

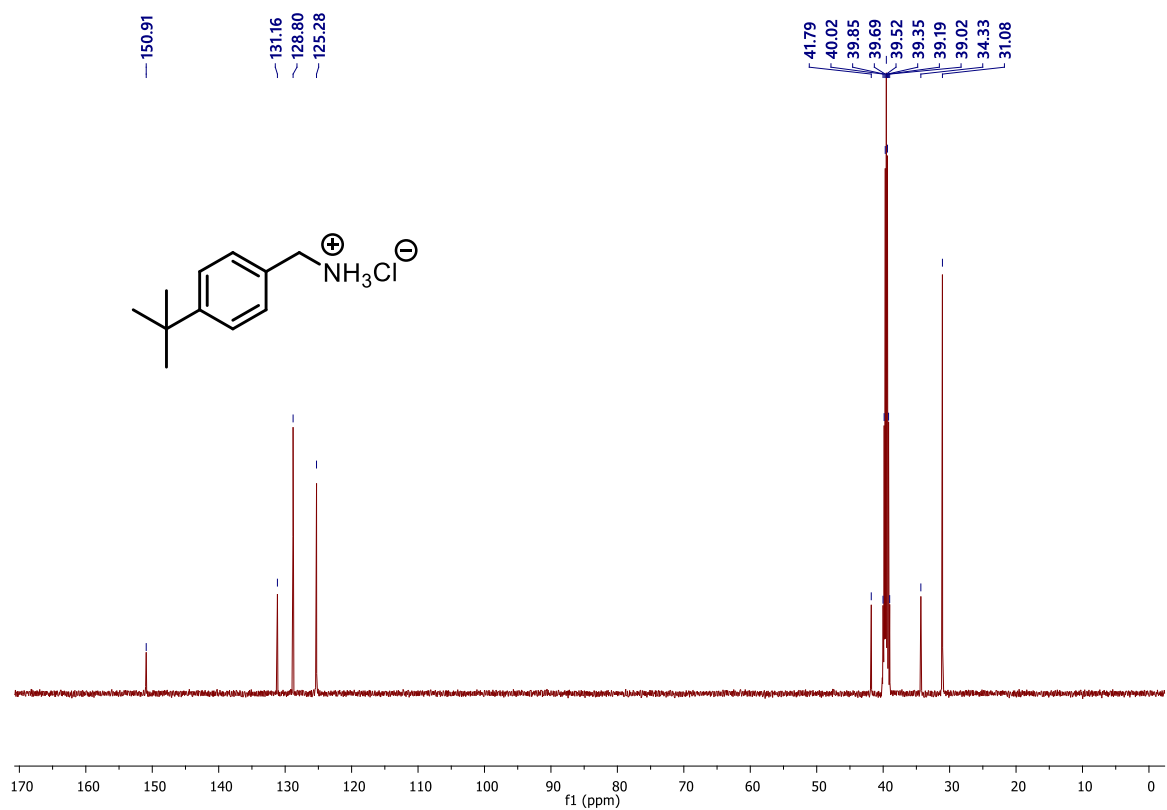

Fig. S62  $^{13}\text{C}\{^1\text{H}\}$  NMR spectrum of 4v in DMSO- $d_6$ .<sup>S12</sup>

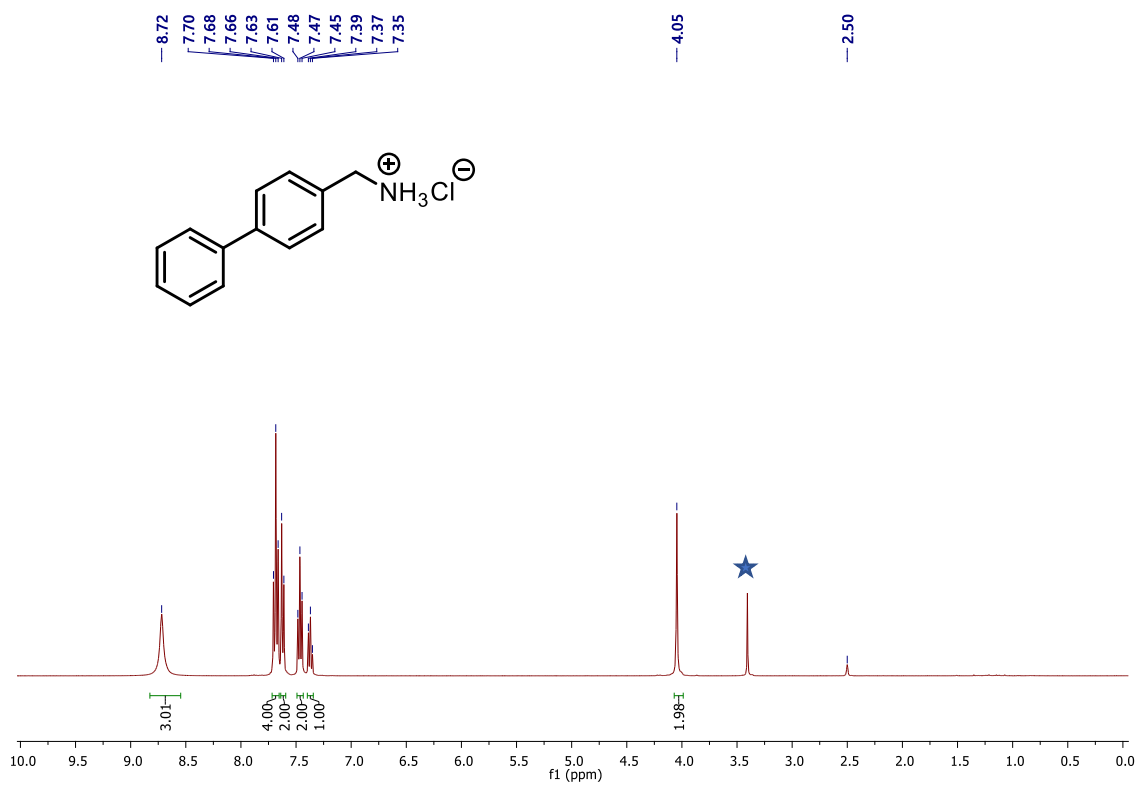

Fig. S63  $^1\text{H}$  NMR spectrum of 4w in DMSO- $d_6$ .<sup>S12</sup> ★ denotes moisture peak in DMSO- $d_6$ .

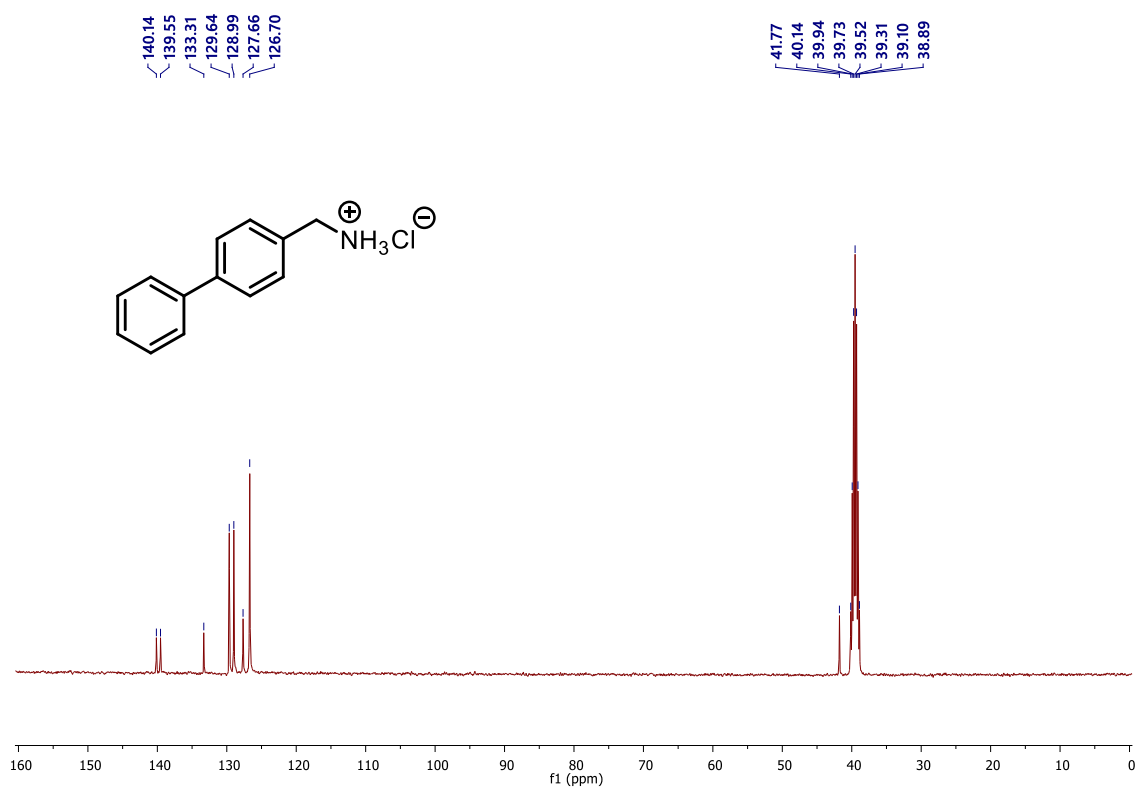

Fig. S64  $^{13}\text{C}\{^1\text{H}\}$  NMR spectrum of **4w** in  $\text{DMSO-d}_6$ .<sup>S12</sup>

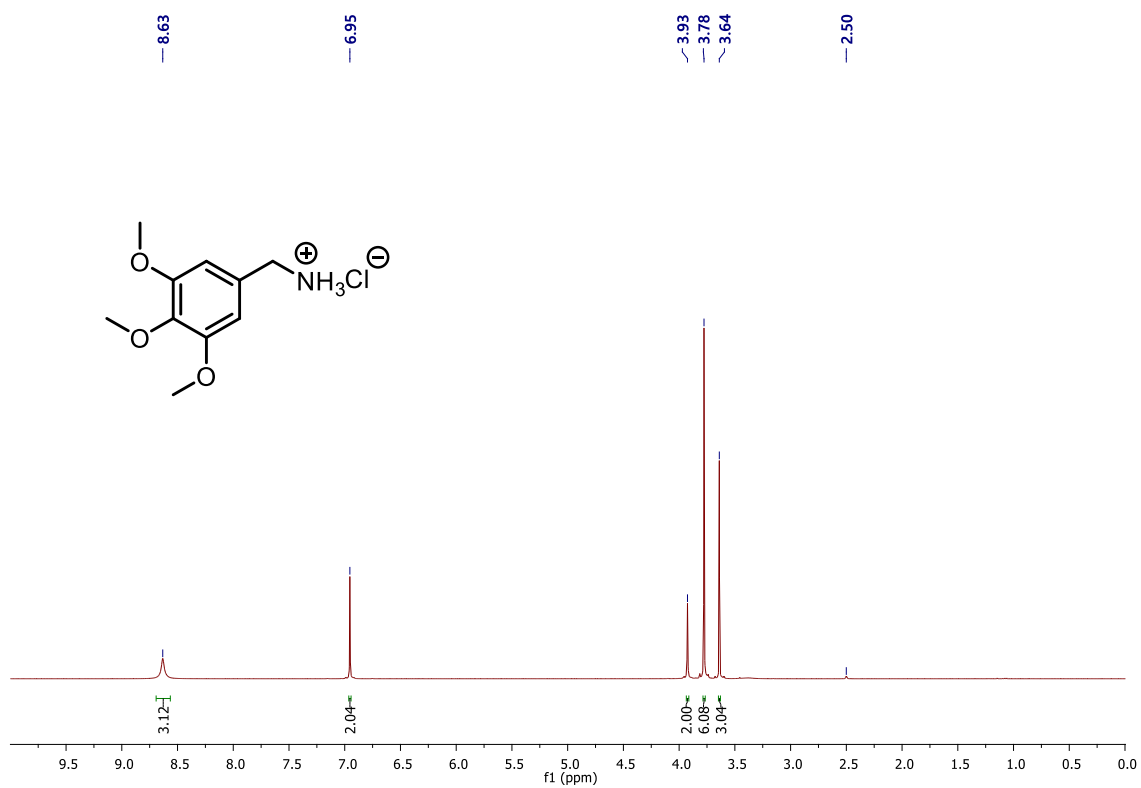

Fig. S65  $^1\text{H}$  NMR spectrum of **4x** in  $\text{DMSO-d}_6$ .<sup>S18</sup>

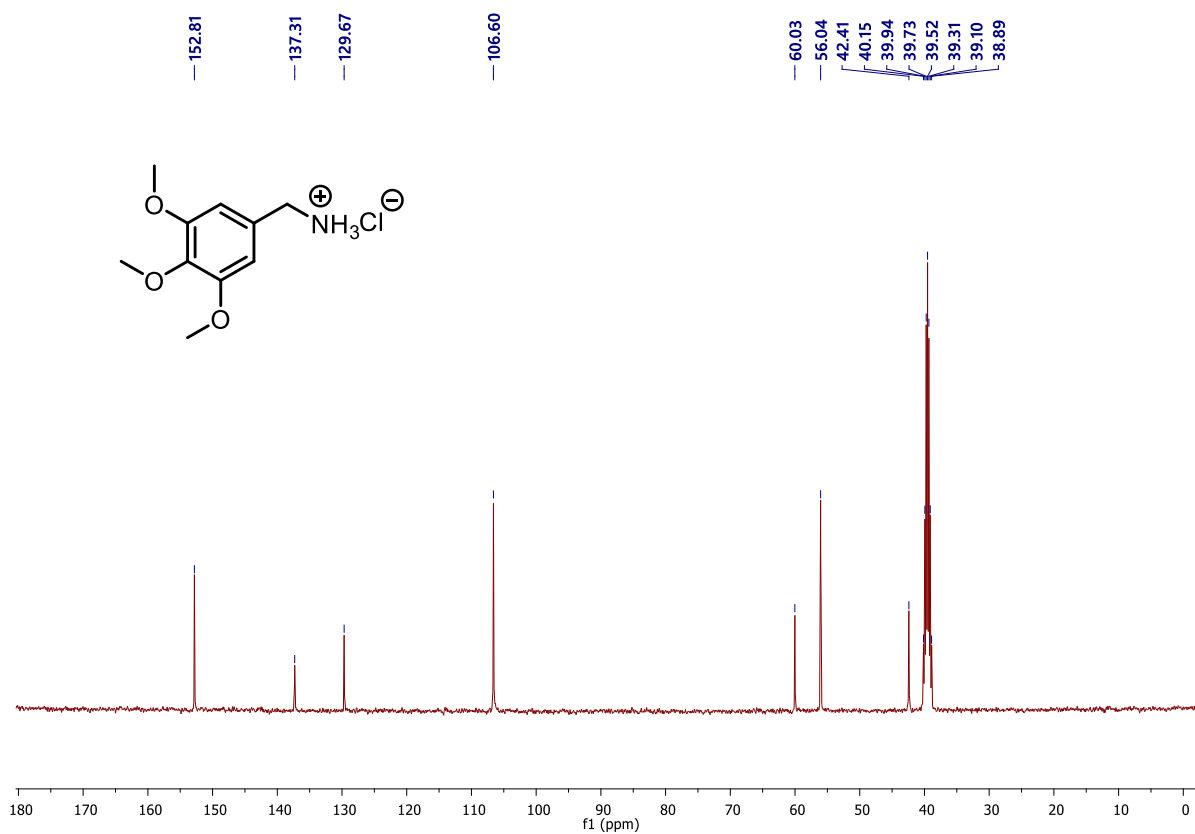

**Fig. S66**  $^{13}\text{C}\{^1\text{H}\}$  NMR spectrum of **4x** in  $\text{DMSO-d}_6$ . <sup>S18</sup>

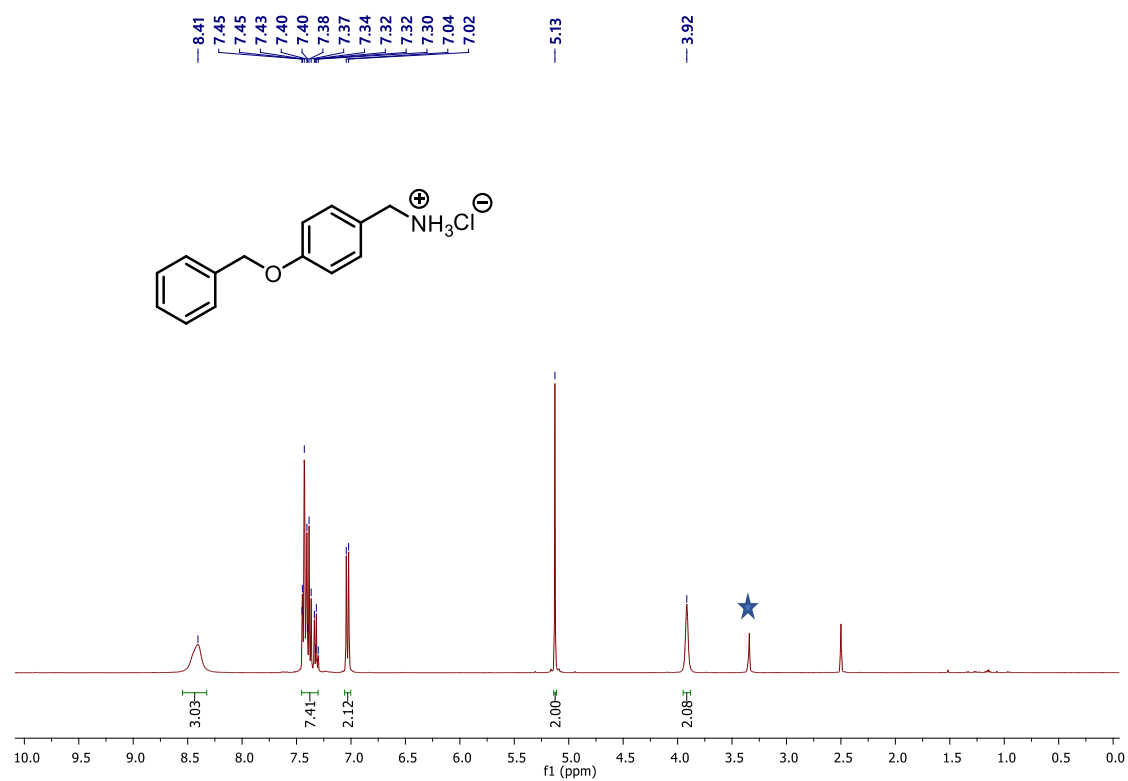

**Fig. S67**  $^1\text{H}$  NMR spectrum of **4y** in  $\text{DMSO-d}_6$ . <sup>S18</sup> ★ denotes moisture peak in  $\text{DMSO-d}_6$ .

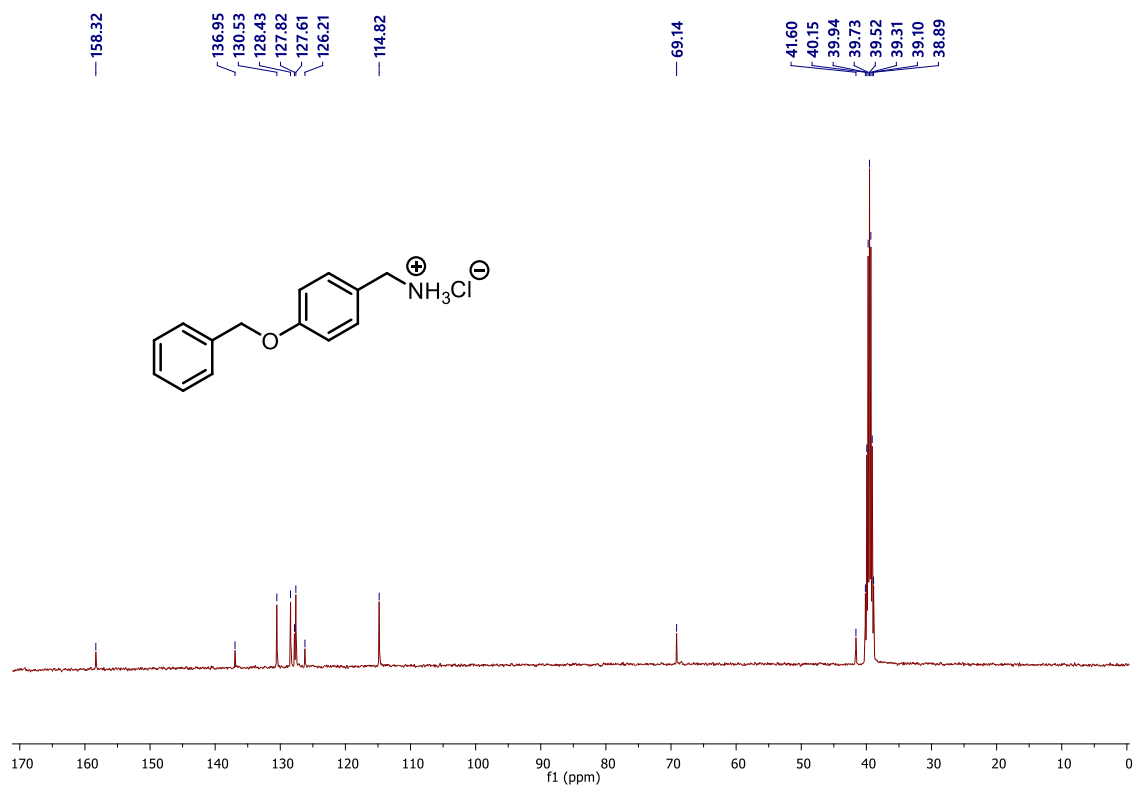

Fig. S68  $^{13}\text{C}\{^1\text{H}\}$  NMR spectrum of **4y** in  $\text{DMSO-d}_6$ .<sup>S18</sup>

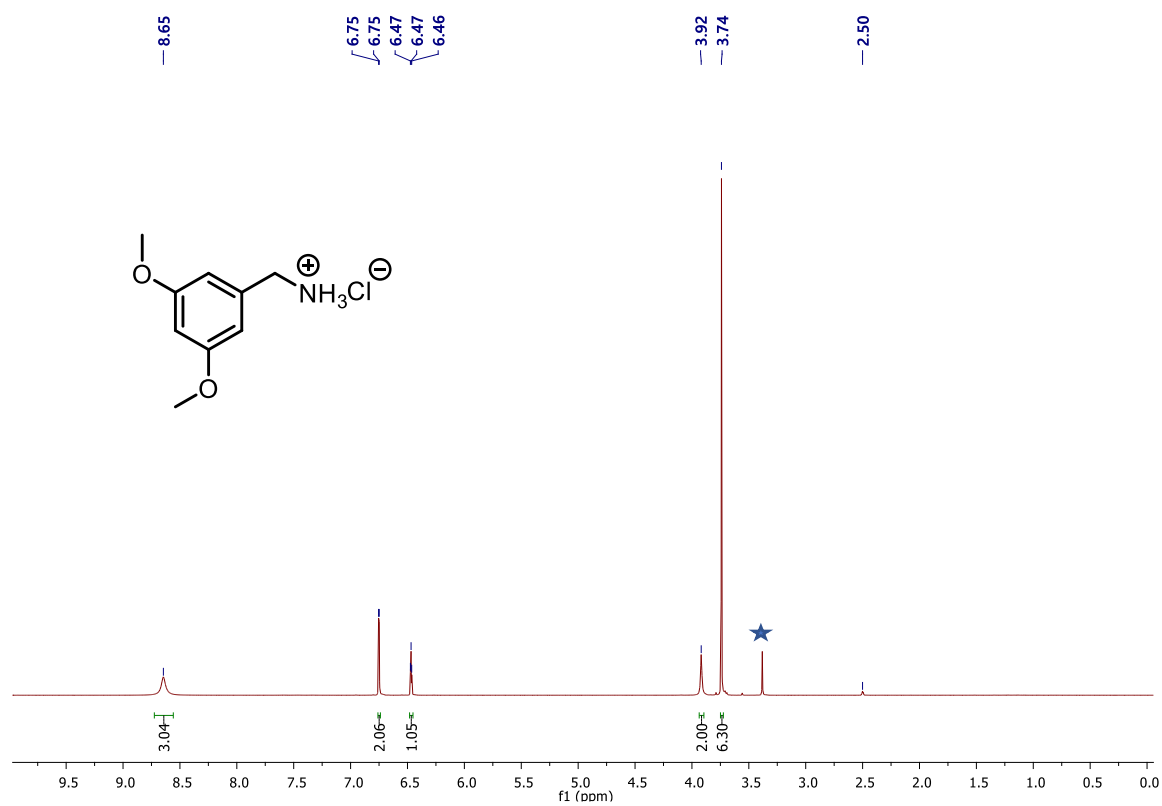

Fig. S69  $^1\text{H}$  NMR spectrum of **4z** in  $\text{DMSO-d}_6$ .<sup>S19</sup> ★ denotes moisture peak in  $\text{DMSO-d}_6$ .

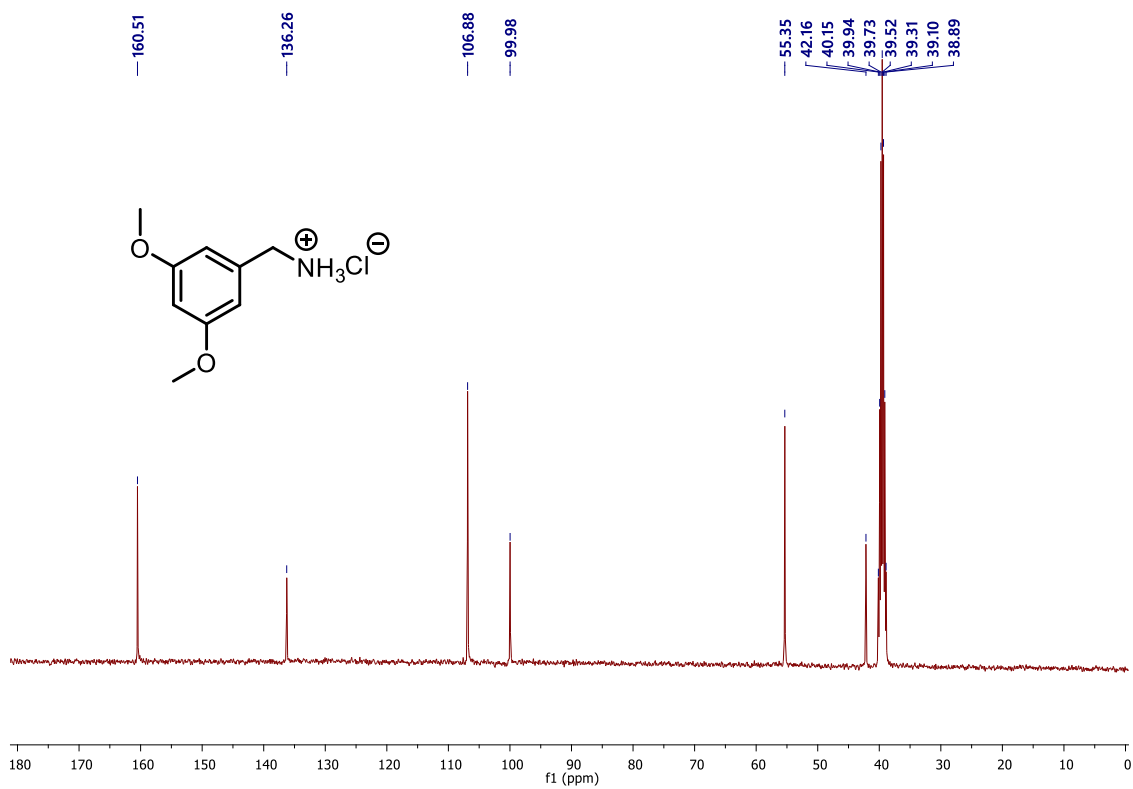

**Fig. S70**  $^{13}\text{C}\{^1\text{H}\}$  NMR spectrum of **4z** in  $\text{DMSO-d}_6$ .<sup>S19</sup>

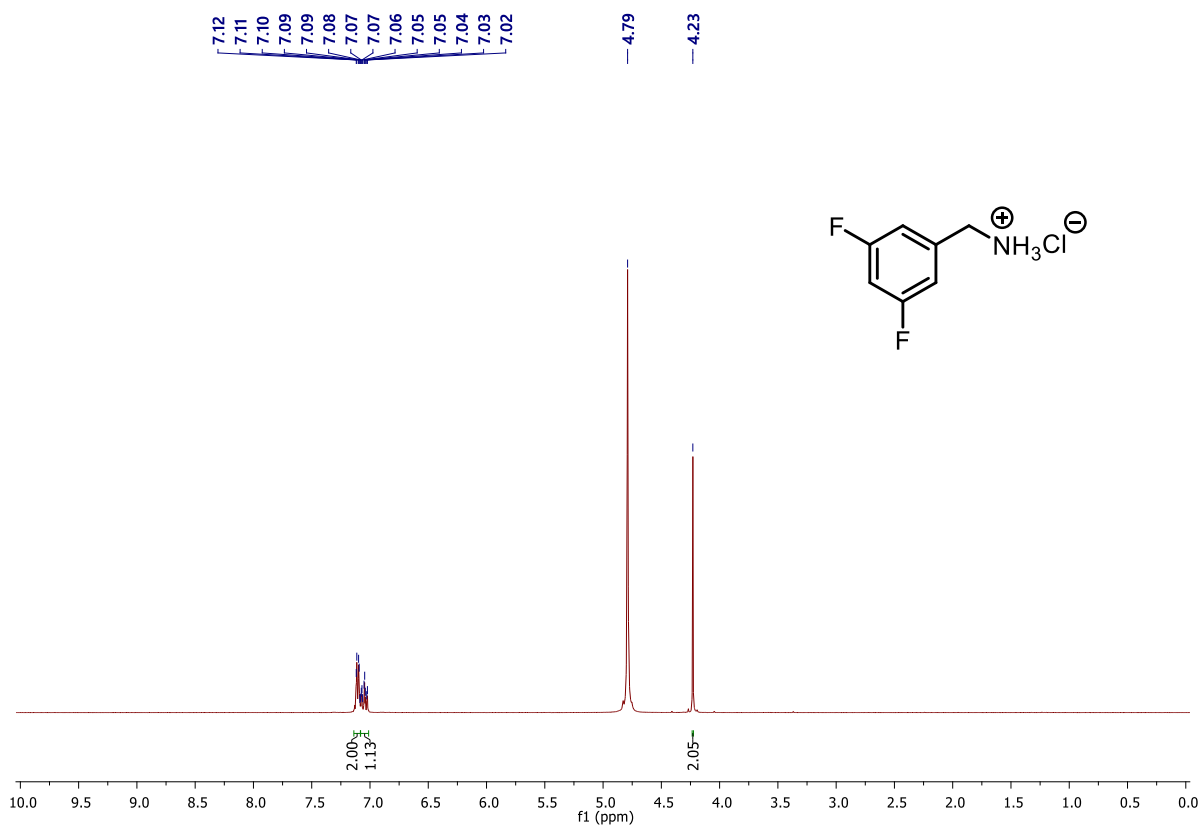

**Fig. S71**  $^1\text{H}$  NMR spectrum of **4aa** in  $\text{D}_2\text{O}$ .<sup>S20</sup>

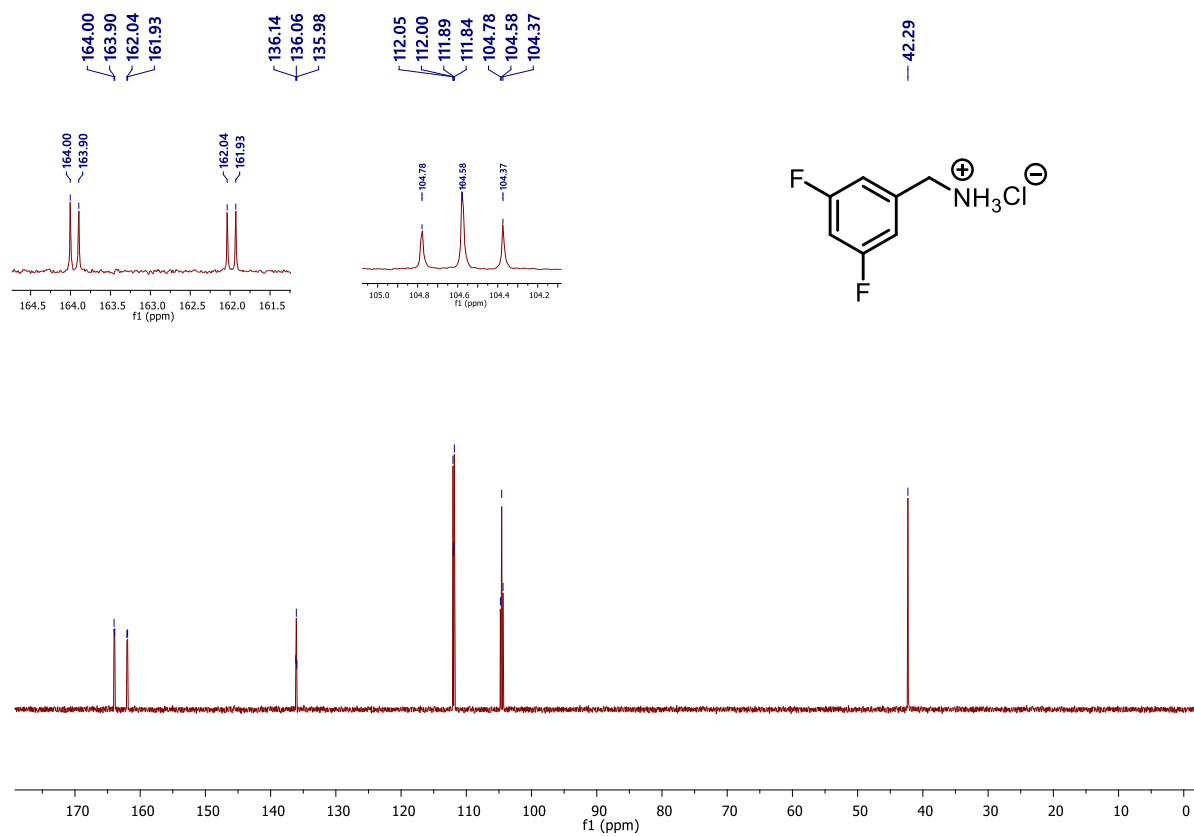

Fig. S72  $^{13}\text{C}\{^1\text{H}\}$  NMR spectrum of 4aa in  $\text{D}_2\text{O}$ .<sup>S20</sup>

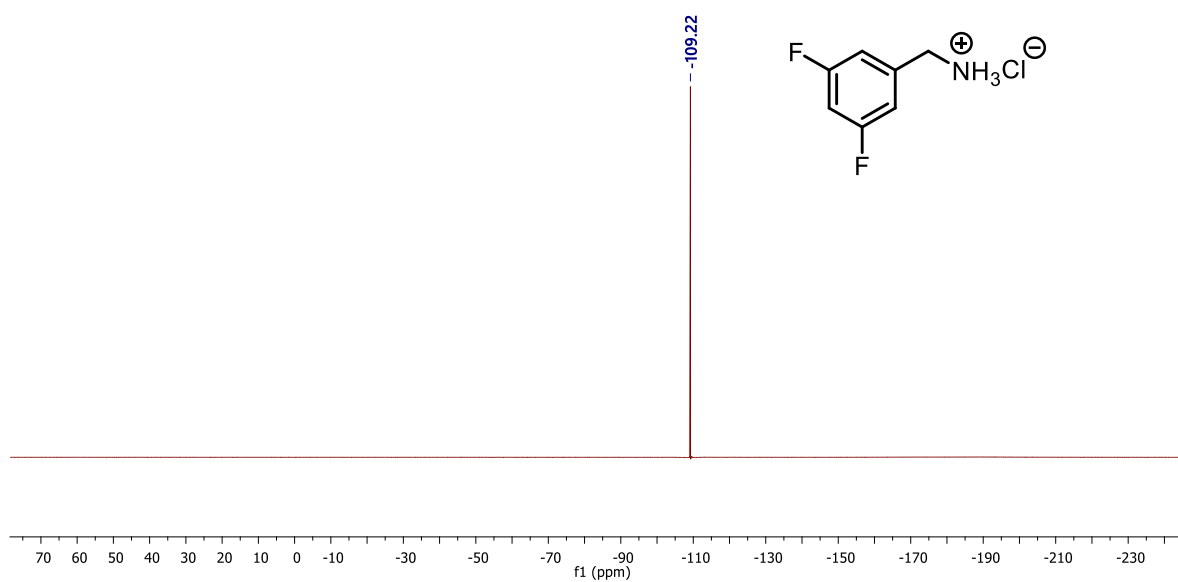

Fig. S73  $^{19}\text{F}\{^1\text{H}\}$  NMR spectrum of 4aa in  $\text{D}_2\text{O}$ .

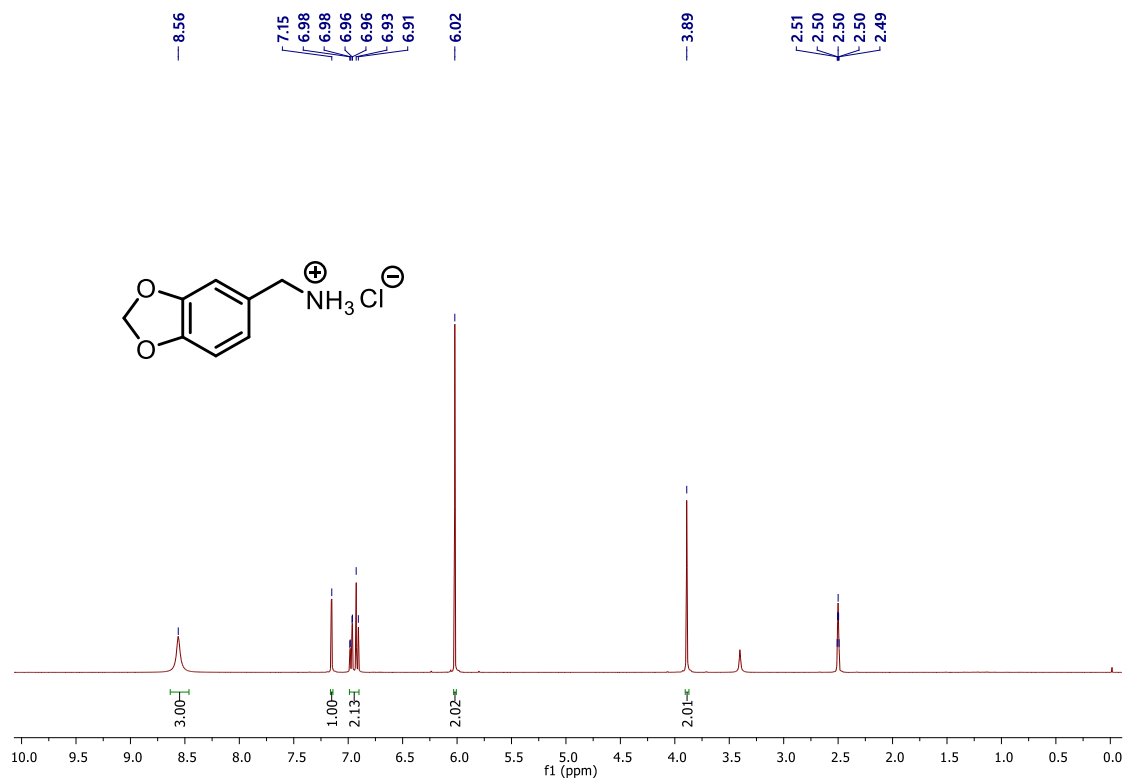

**Fig. S74** <sup>1</sup>H NMR spectrum of **4ab** in DMSO-d<sub>6</sub>.<sup>S14</sup>

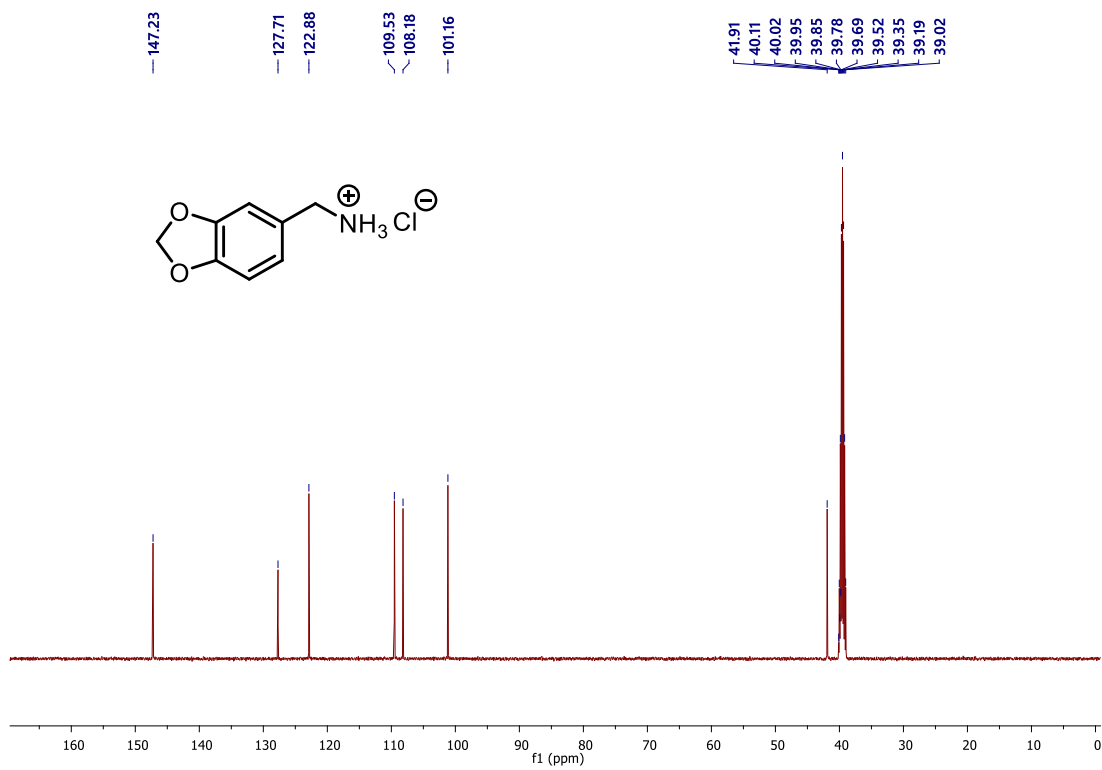

**Fig. S75** <sup>13</sup>C{<sup>1</sup>H} NMR spectrum of **4ab** in DMSO-d<sub>6</sub>.<sup>S14</sup>



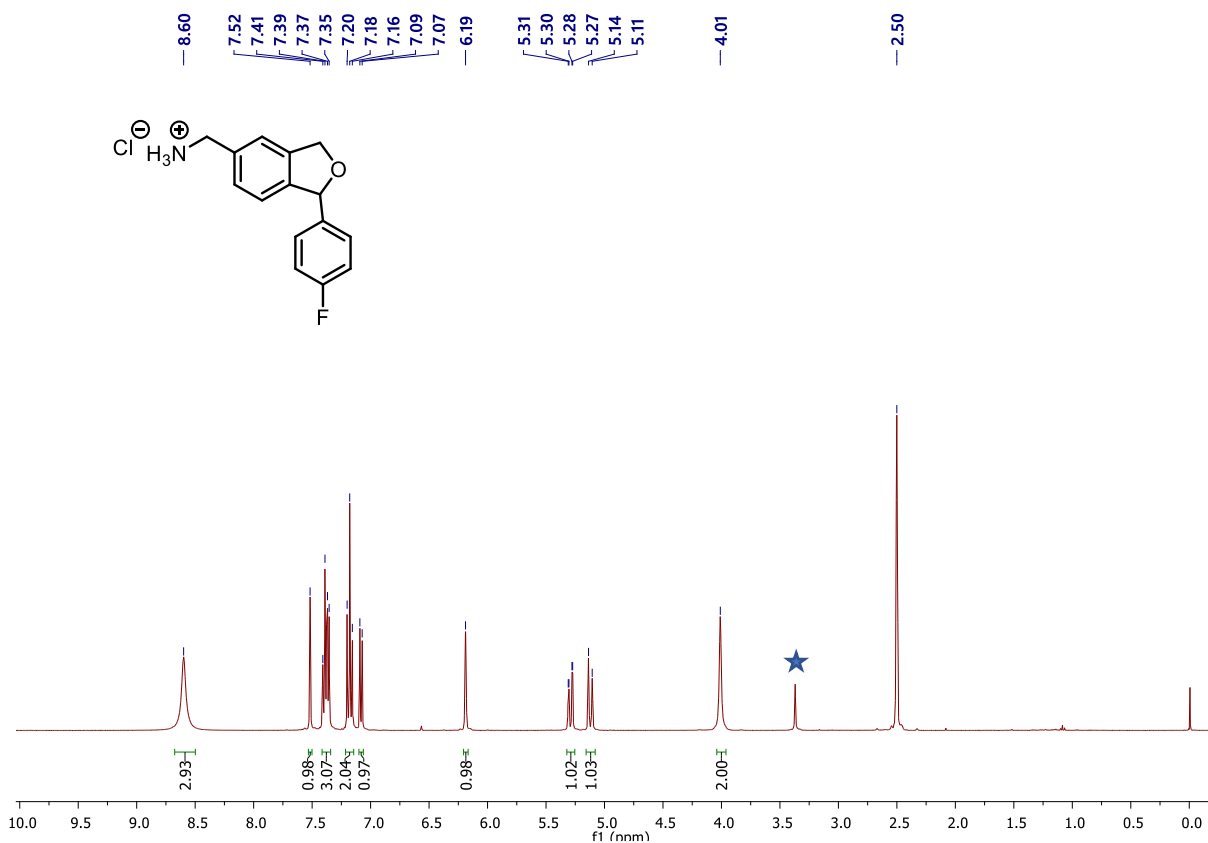

**Fig. S76**  $^1\text{H}$  NMR spectrum of **4ac** in  $\text{DMSO-d}_6$ .  $\star$  denotes moisture peak in  $\text{DMSO-d}_6$ .

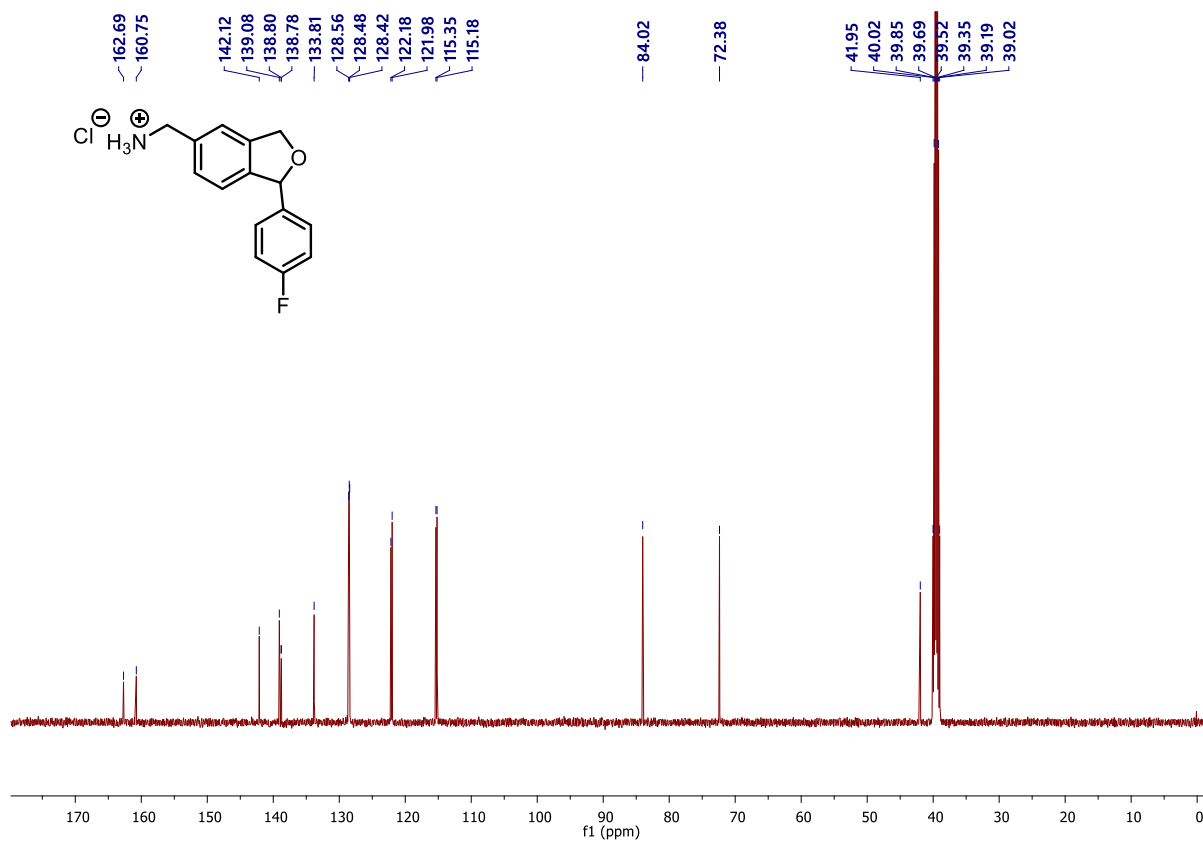

**Fig. S77**  $^{13}\text{C}\{^1\text{H}\}$  NMR spectrum of **4ac** in  $\text{DMSO-d}_6$ .

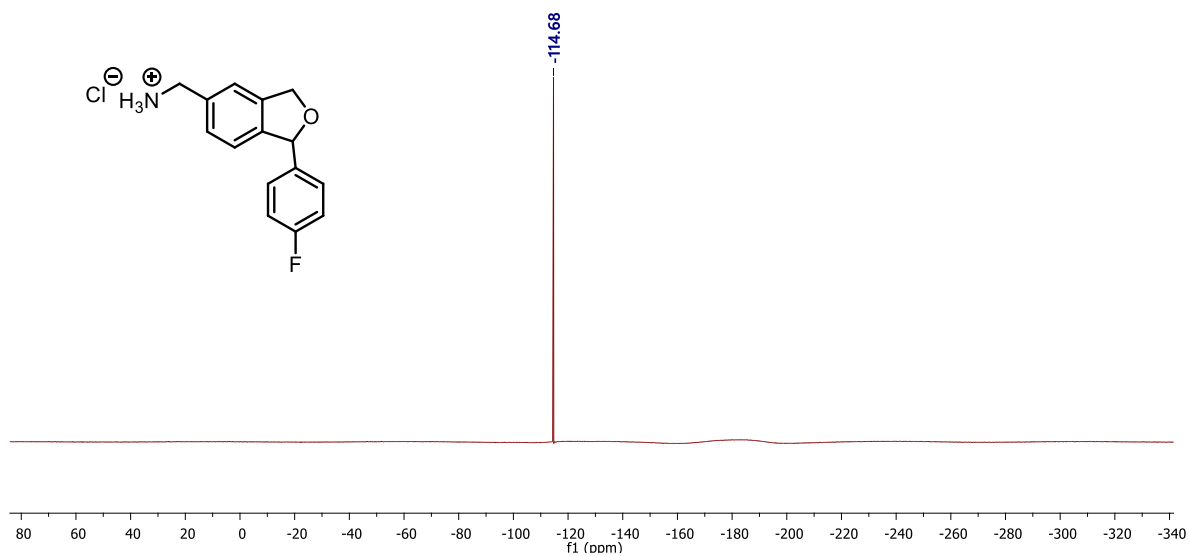

**Fig. S78**  $^{19}\text{F}\{^1\text{H}\}$  NMR spectrum of **4ac** in  $\text{DMSO-d}_6$ .

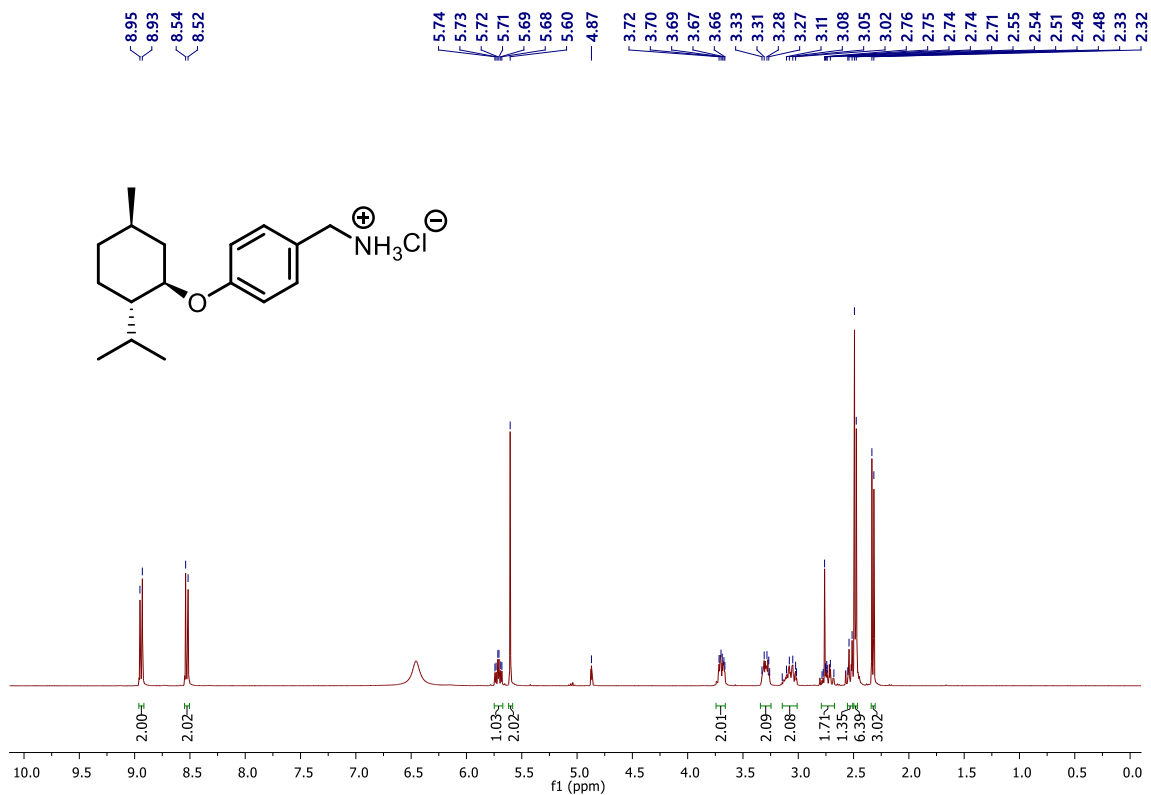

**Fig. S79**  $^1\text{H}$  NMR spectrum of **4ad** in  $\text{CD}_3\text{OD}$ .

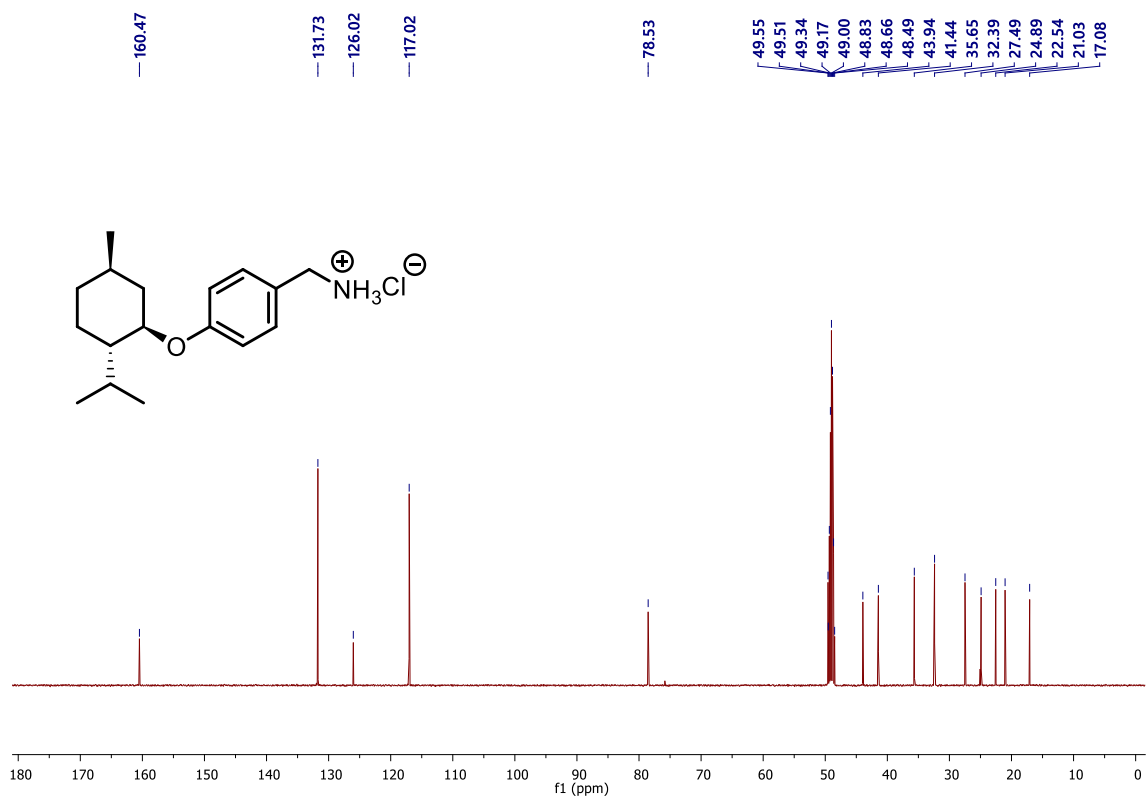

*Fig. S80*  $^{13}\text{C}\{^1\text{H}\}$  NMR spectrum of **4ad** in  $\text{CD}_3\text{OD}$ .

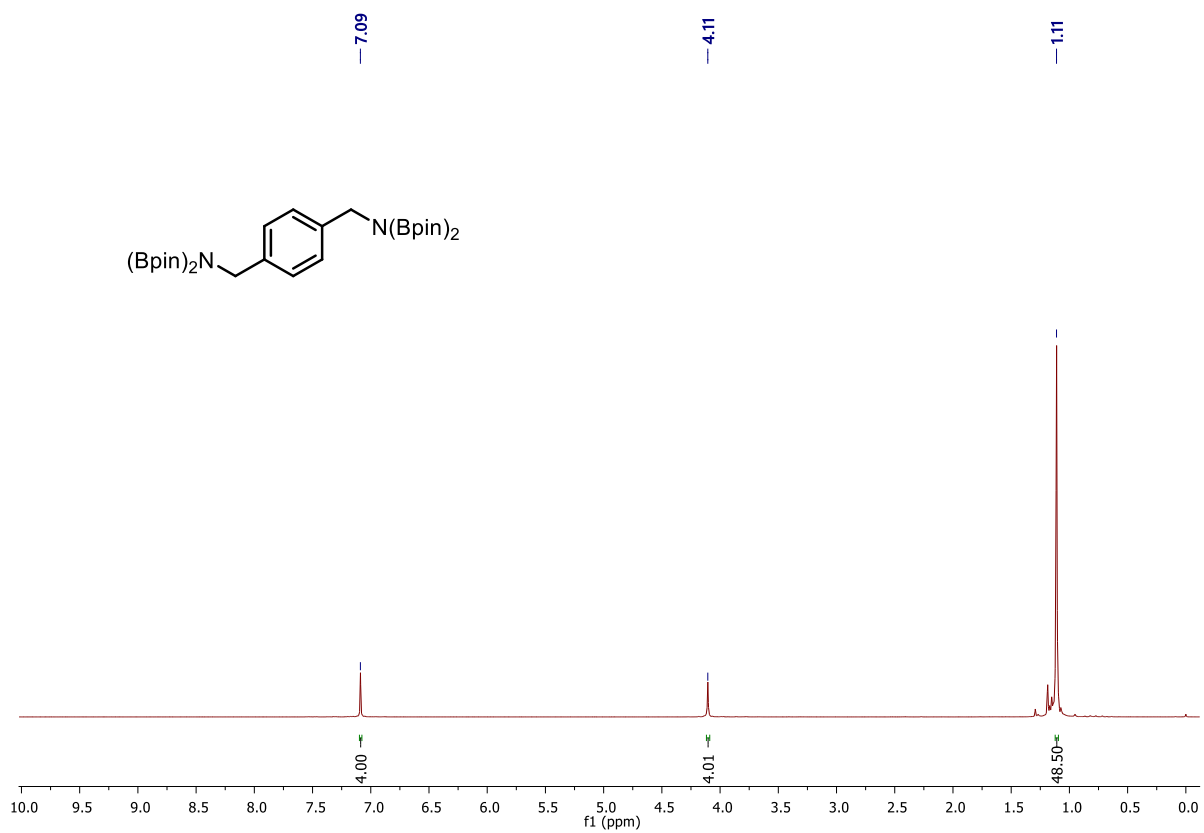

*Fig. S81*  $^1\text{H}$  NMR spectrum of **3ae** in  $\text{CDCl}_3$ . <sup>S7</sup>

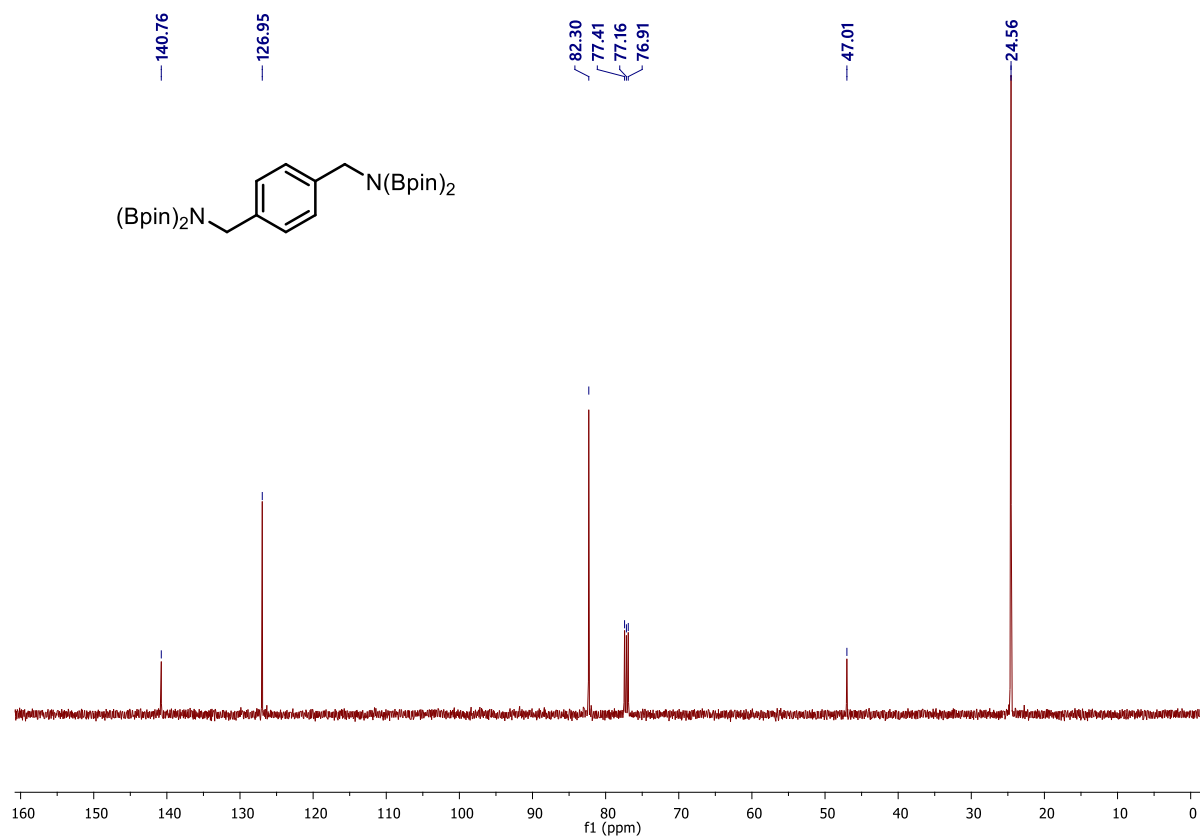

**Fig. S82**  $^{13}\text{C}\{^1\text{H}\}$  NMR spectrum of **3ae** in  $\text{CDCl}_3$ . <sup>S7</sup>

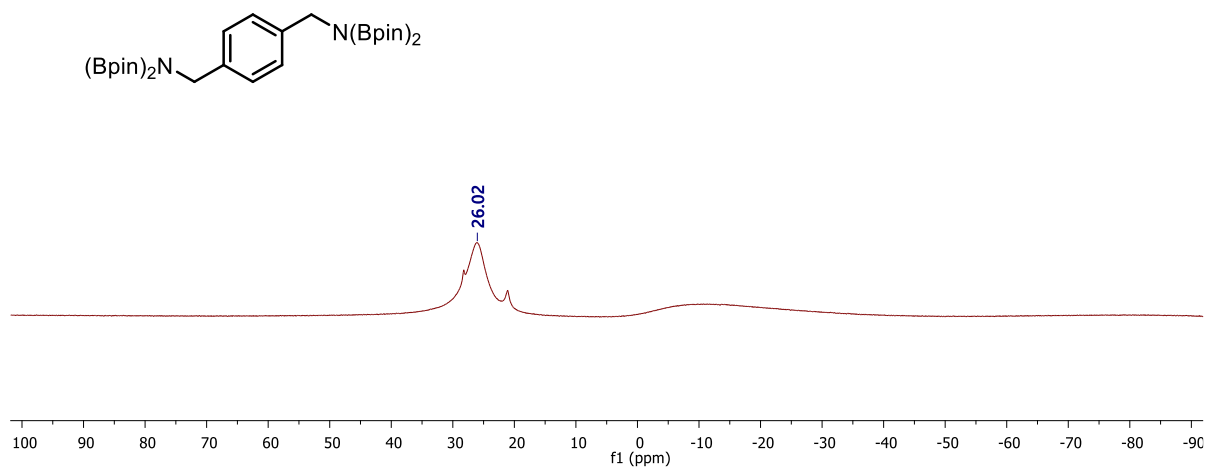

**Fig. S83**  $^{11}\text{B}\{^1\text{H}\}$  NMR spectrum of **3ae** in  $\text{CDCl}_3$ . <sup>S7</sup>

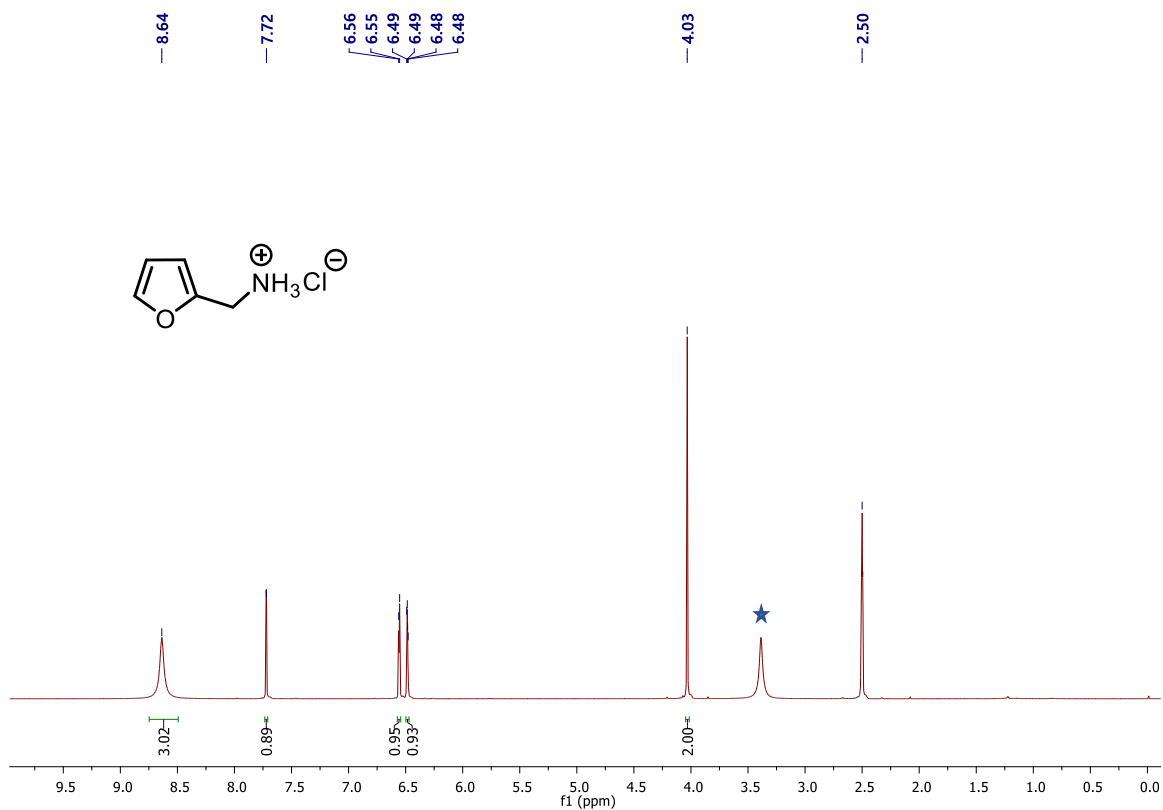

**Fig. S84**  $^1\text{H}$  NMR spectrum of **4af** in  $\text{DMSO-d}_6$ . <sup>S22</sup> ★ denotes moisture peak in  $\text{DMSO-d}_6$ .

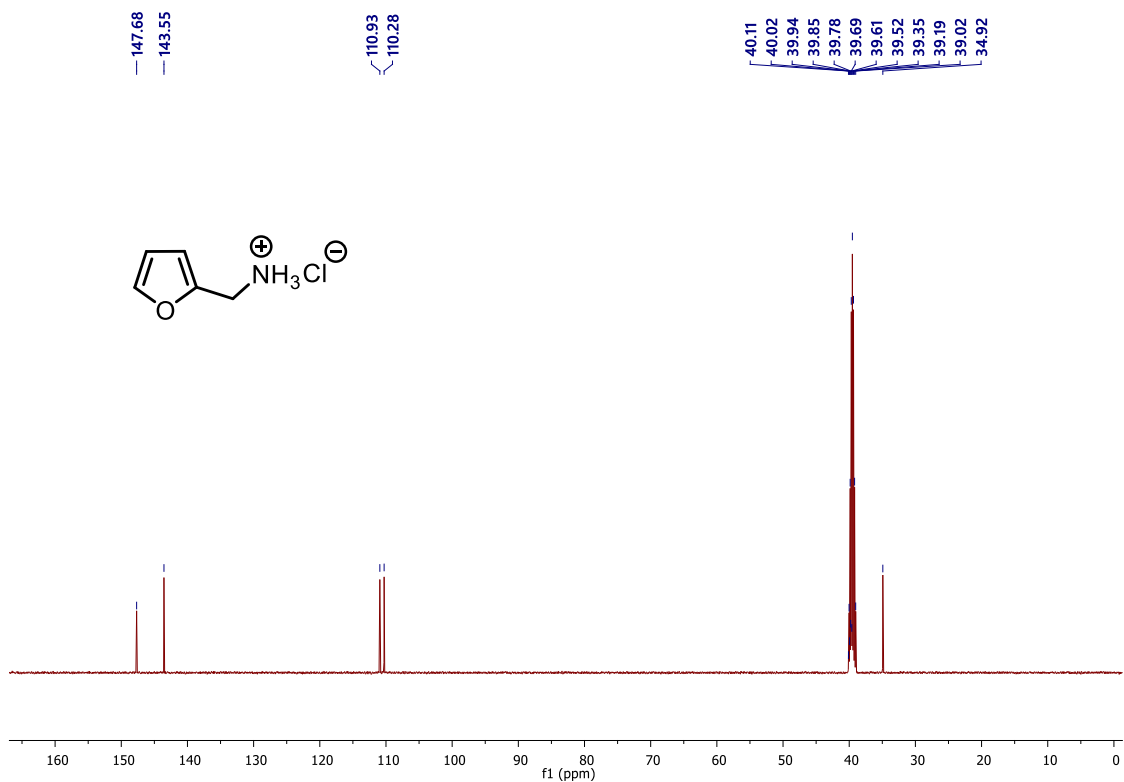

**Fig. S85**  $^{13}\text{C}\{^1\text{H}\}$  NMR spectrum of **4af** in  $\text{DMSO-d}_6$ . <sup>S22</sup>

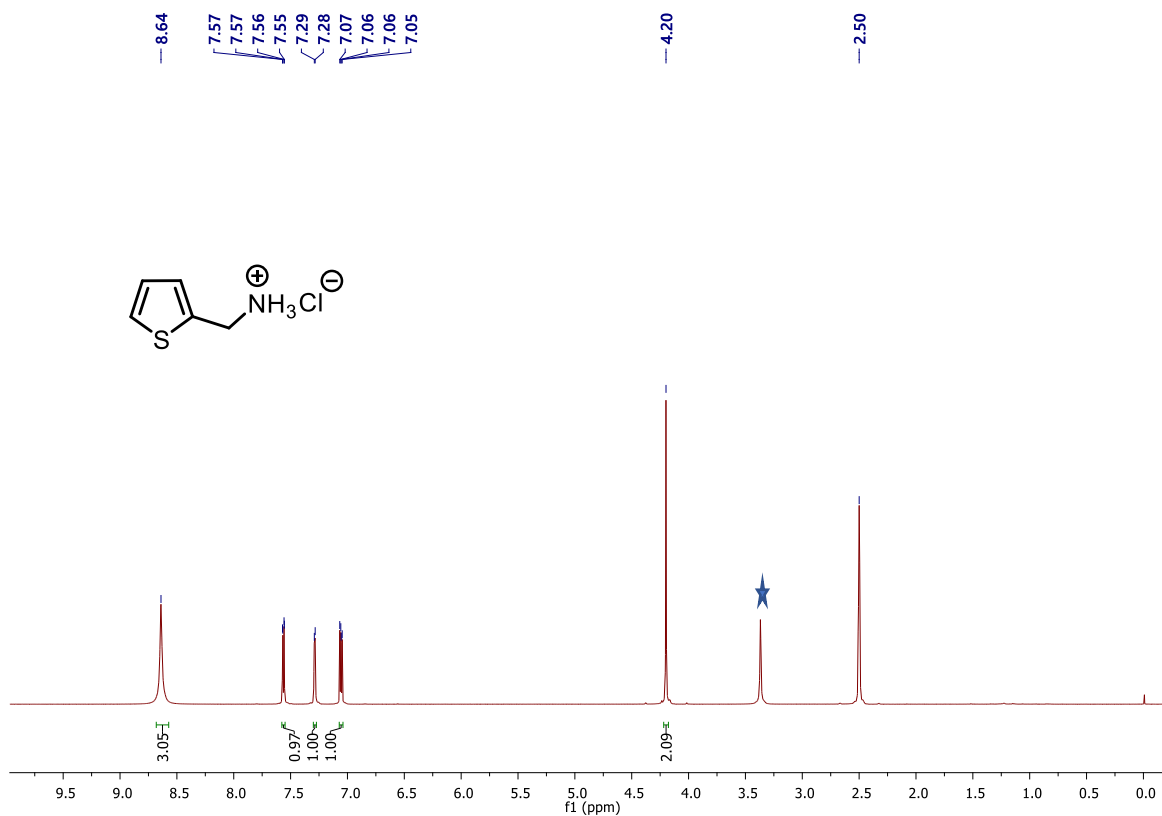

Fig. S86  $^1\text{H}$  NMR spectrum of **4ag** in  $\text{DMSO-d}_6$ .  $^{\text{S23}}$  ★ denotes moisture peak in  $\text{DMSO-d}_6$ .

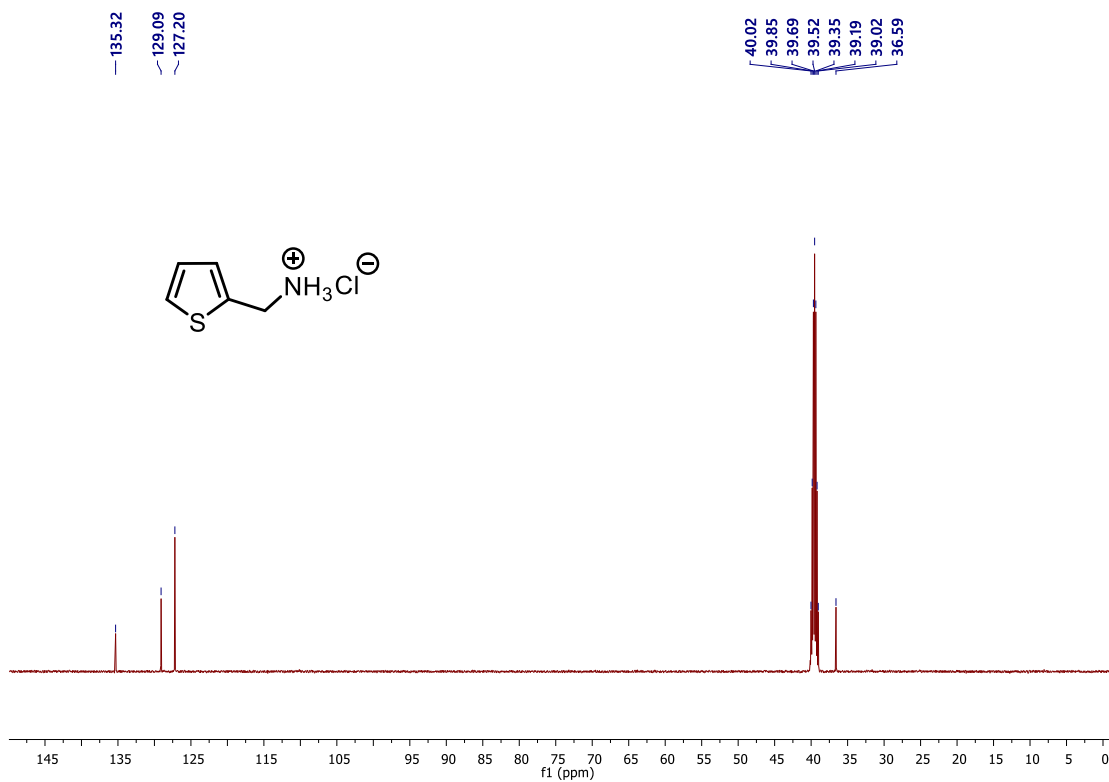

Fig. S87  $^{13}\text{C}\{^1\text{H}\}$  NMR spectrum of **4ag** in  $\text{DMSO-d}_6$ .  $^{\text{S23}}$

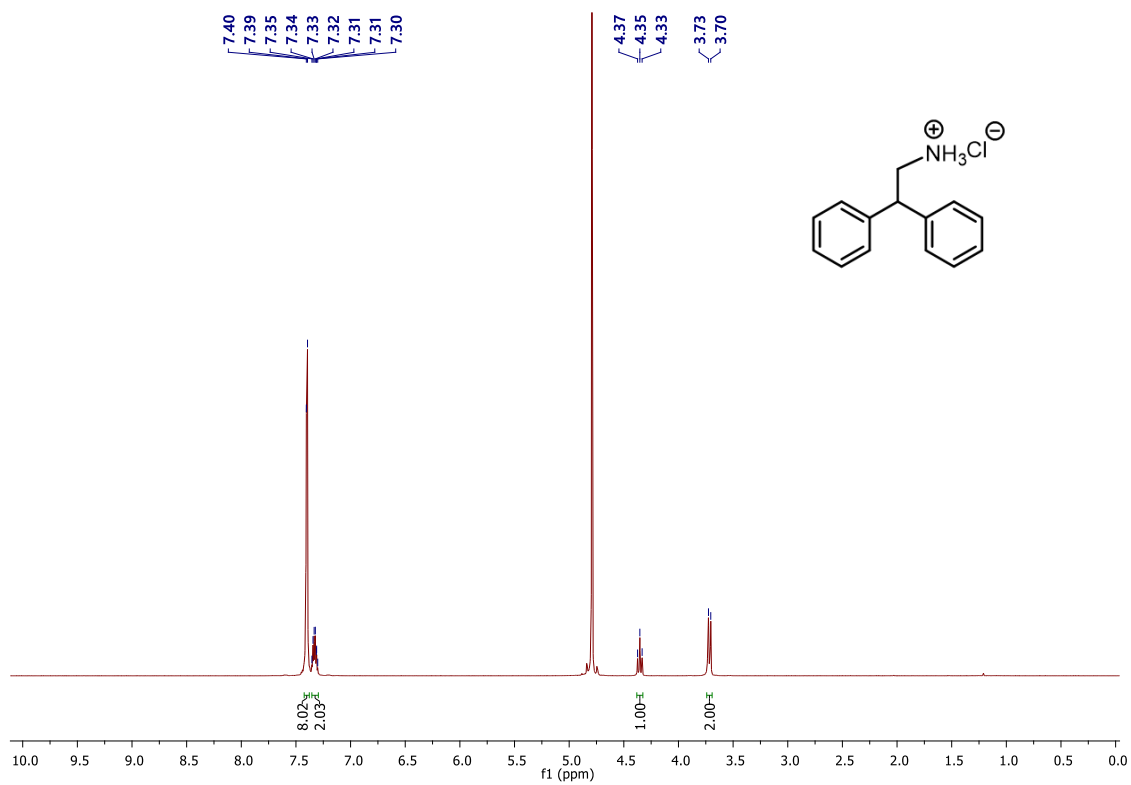

**Fig. S88**  $^1\text{H}$  NMR spectrum of **4ah** in  $\text{D}_2\text{O}$ . <sup>S24</sup>

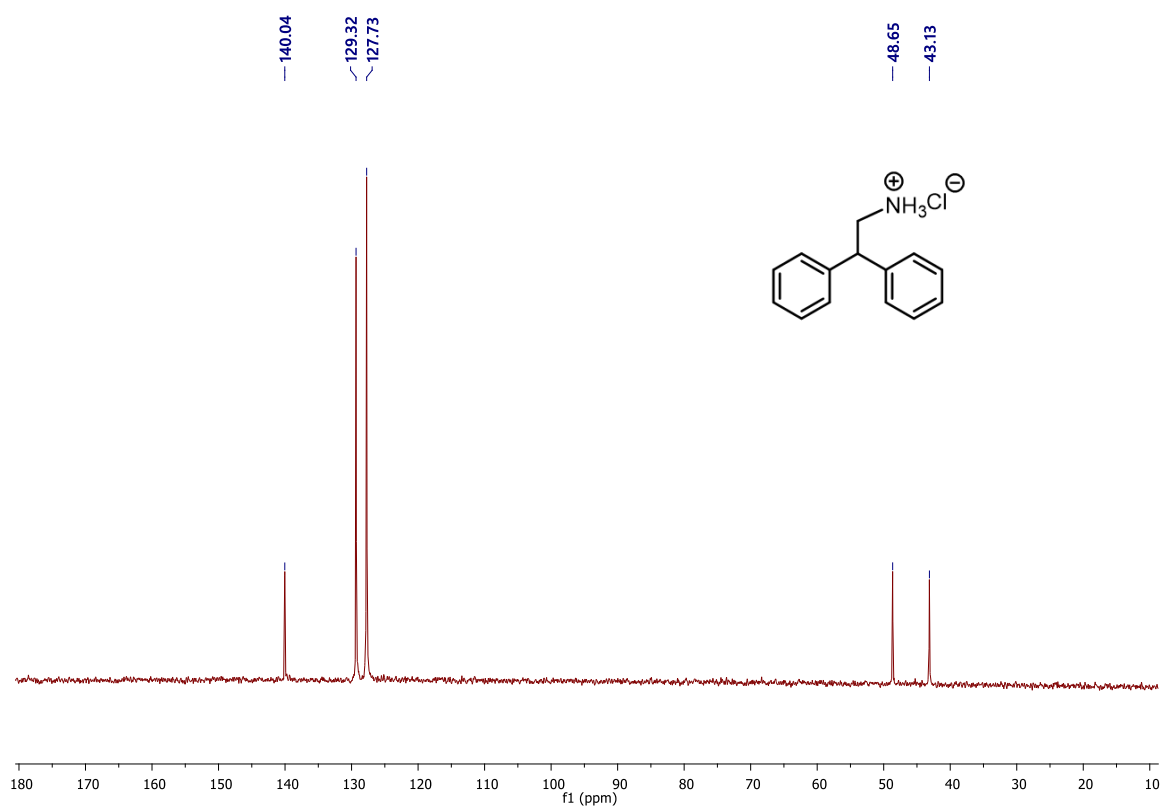

**Fig. S89**  $^{13}\text{C}\{^1\text{H}\}$  NMR spectrum of **4ah** in  $\text{D}_2\text{O}$ . <sup>S24</sup>

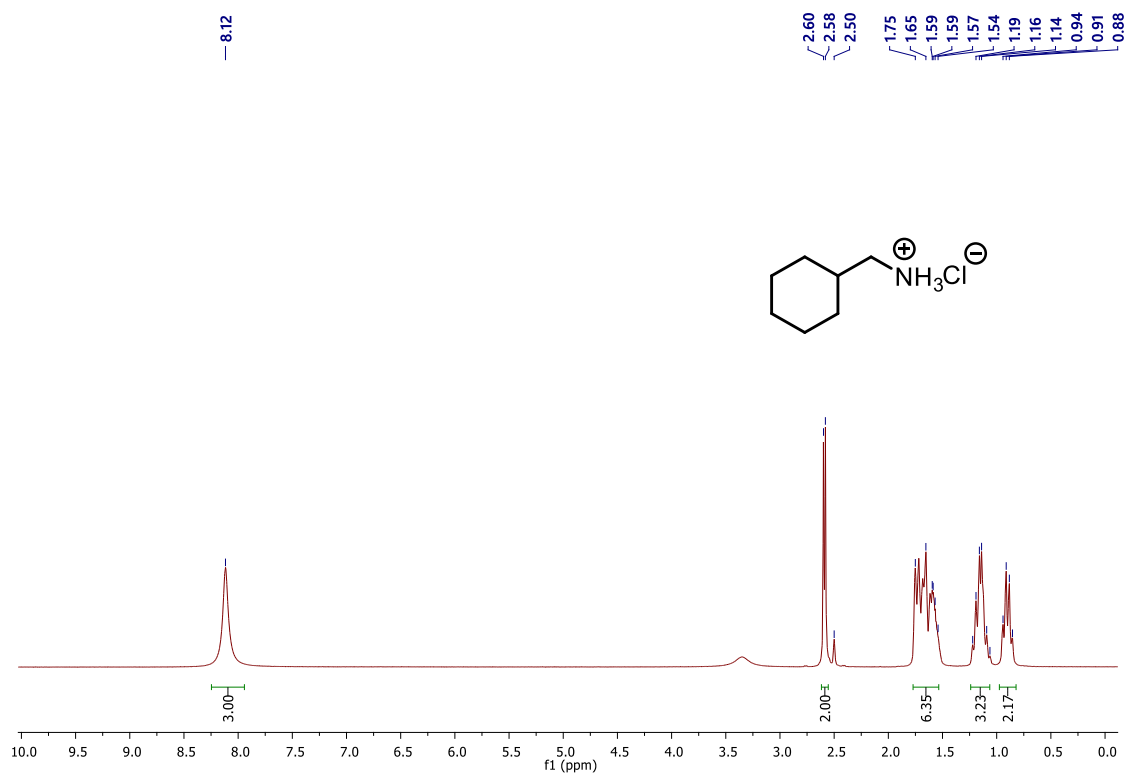

Fig. S90  $^1\text{H}$  NMR spectrum of **4ai** in  $\text{DMSO-d}_6$ .<sup>S25</sup>

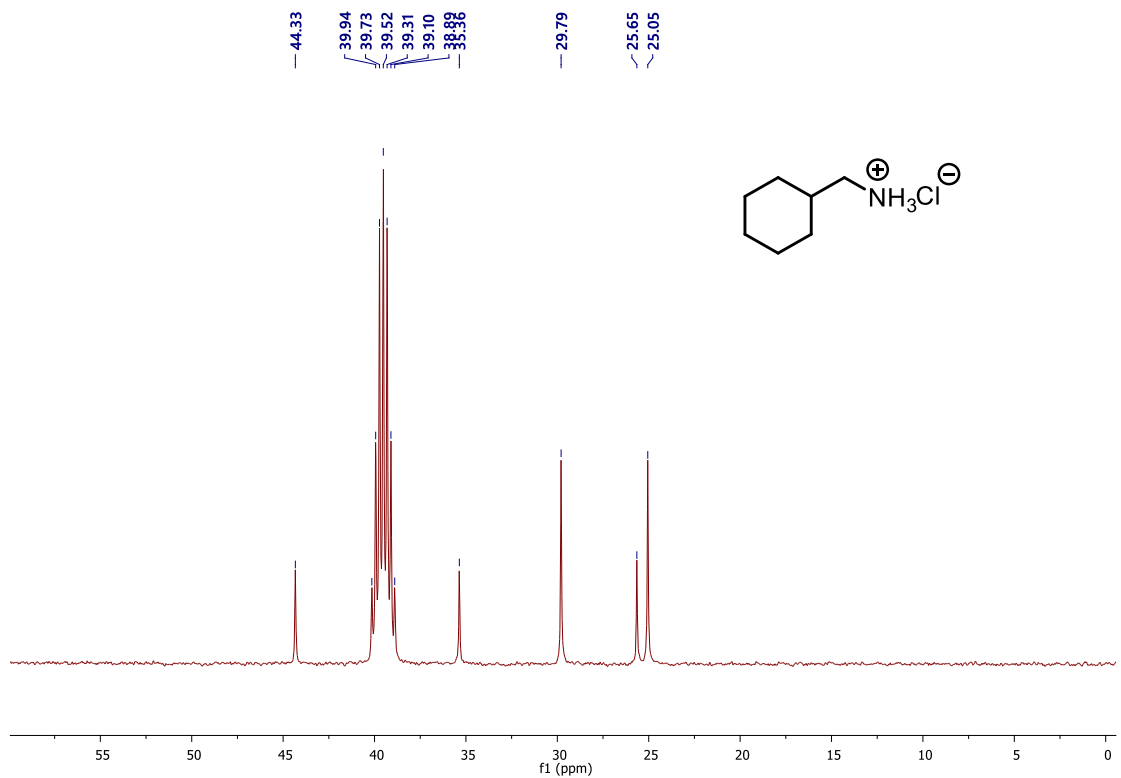

Fig. S91  $^{13}\text{C}\{^1\text{H}\}$  NMR spectrum of **4ai** in  $\text{DMSO-d}_6$ .<sup>S25</sup>



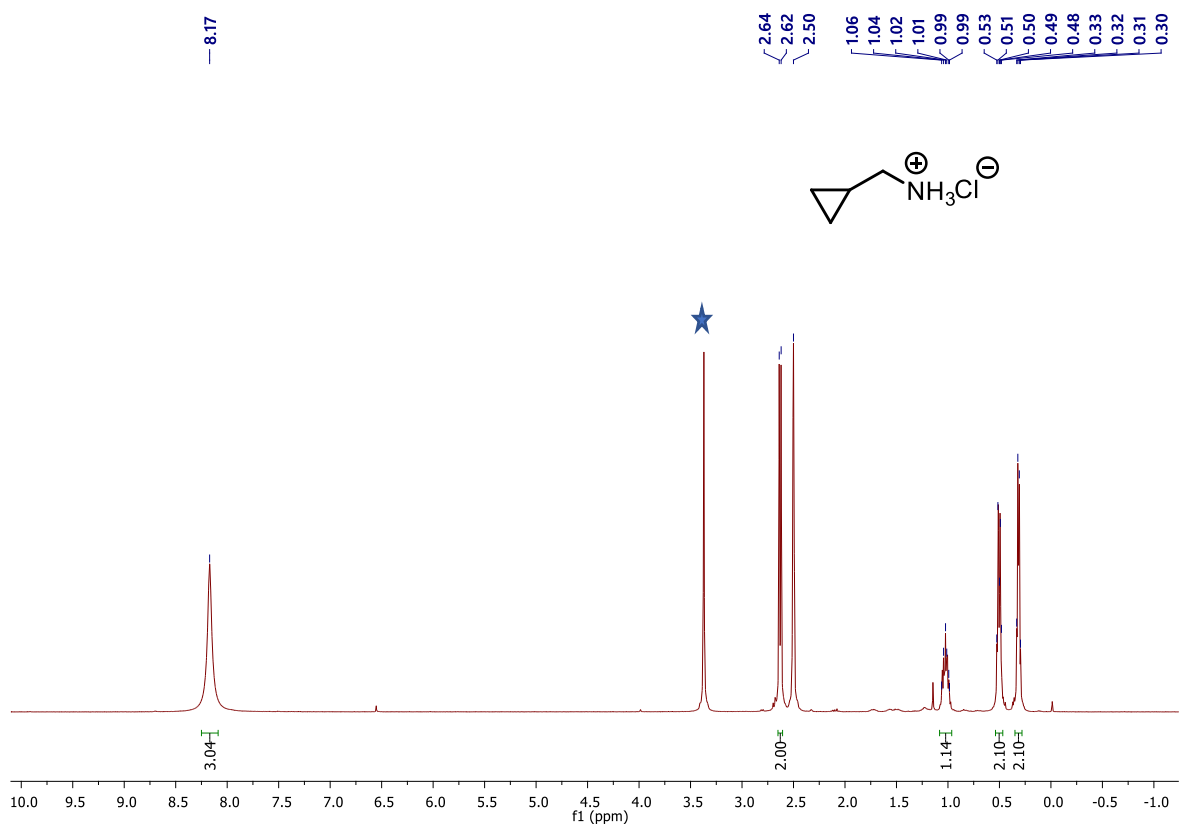

Fig. S92  $^1\text{H}$  NMR spectrum of **4aj** in  $\text{DMSO-d}_6$ . <sup>S12</sup> ★ denotes moisture peak in  $\text{DMSO-d}_6$ .

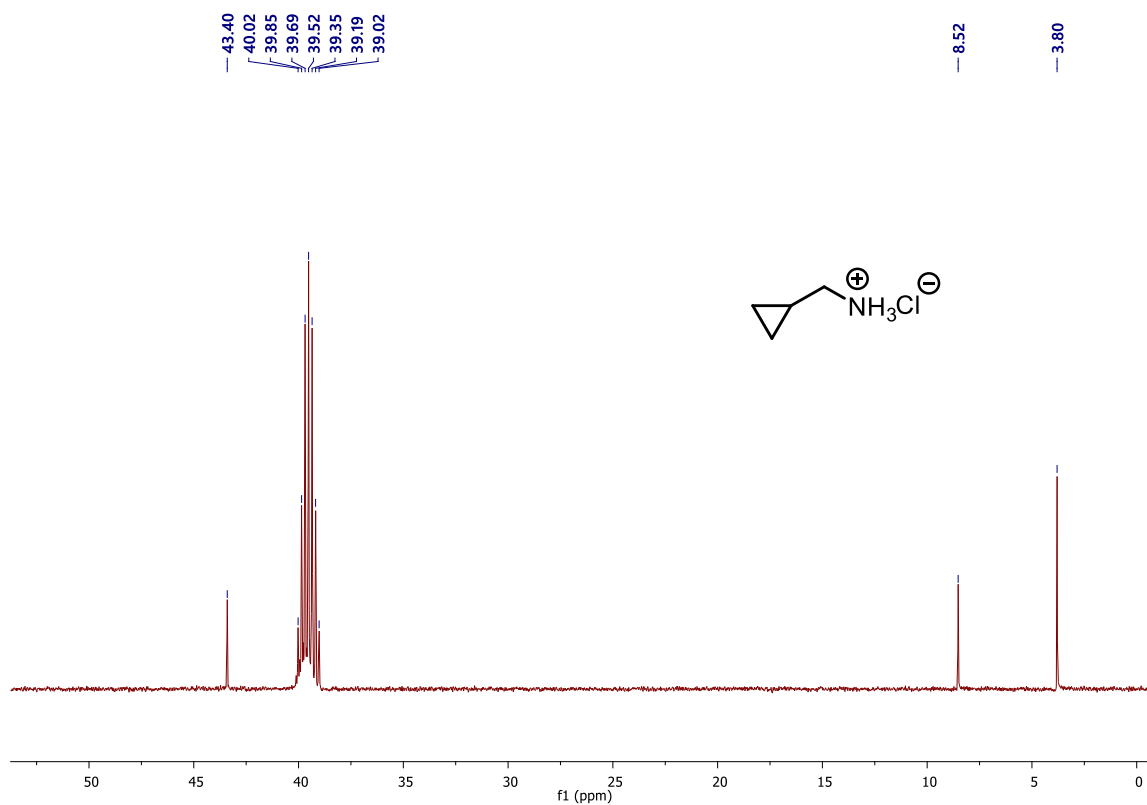

Fig. S93  $^{13}\text{C}\{^1\text{H}\}$  NMR spectrum of **4aj** in  $\text{DMSO-d}_6$ . <sup>S12</sup>

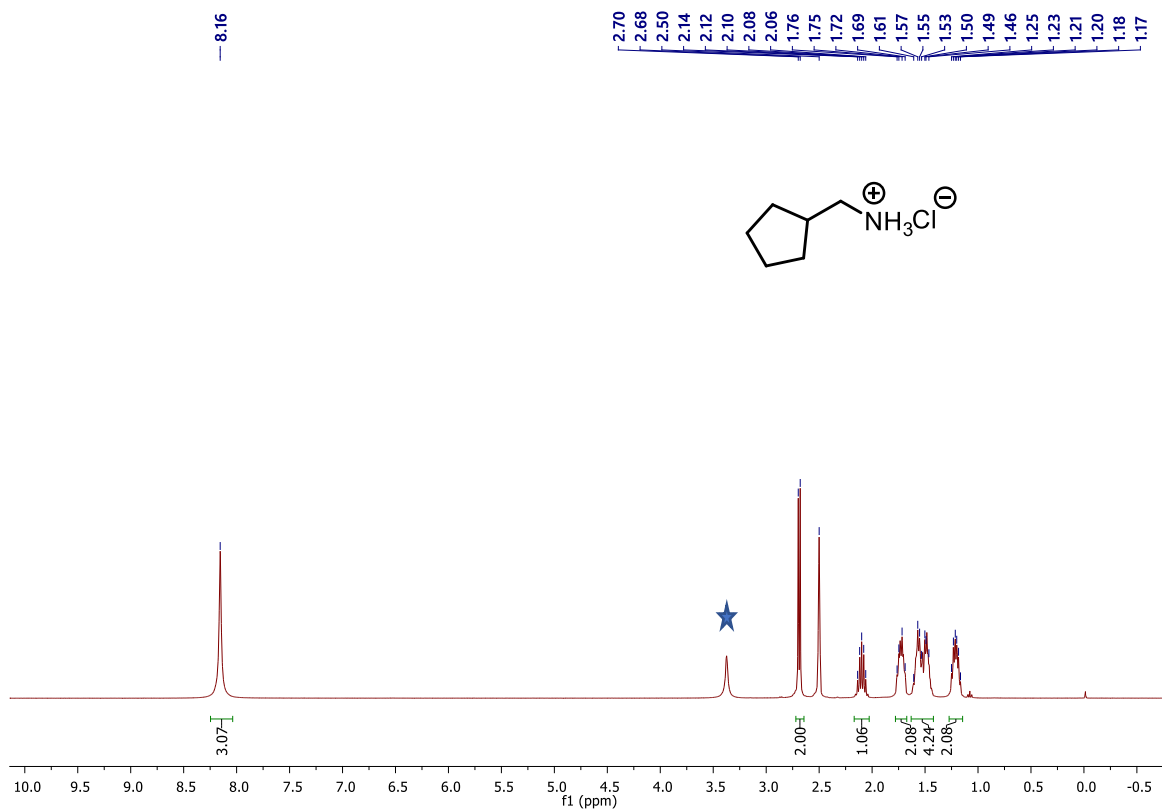

**Fig. S94**  $^1\text{H}$  NMR spectrum of **4ak** in  $\text{DMSO-d}_6$ . <sup>S25</sup> ★ denotes moisture peak in  $\text{DMSO-d}_6$ .

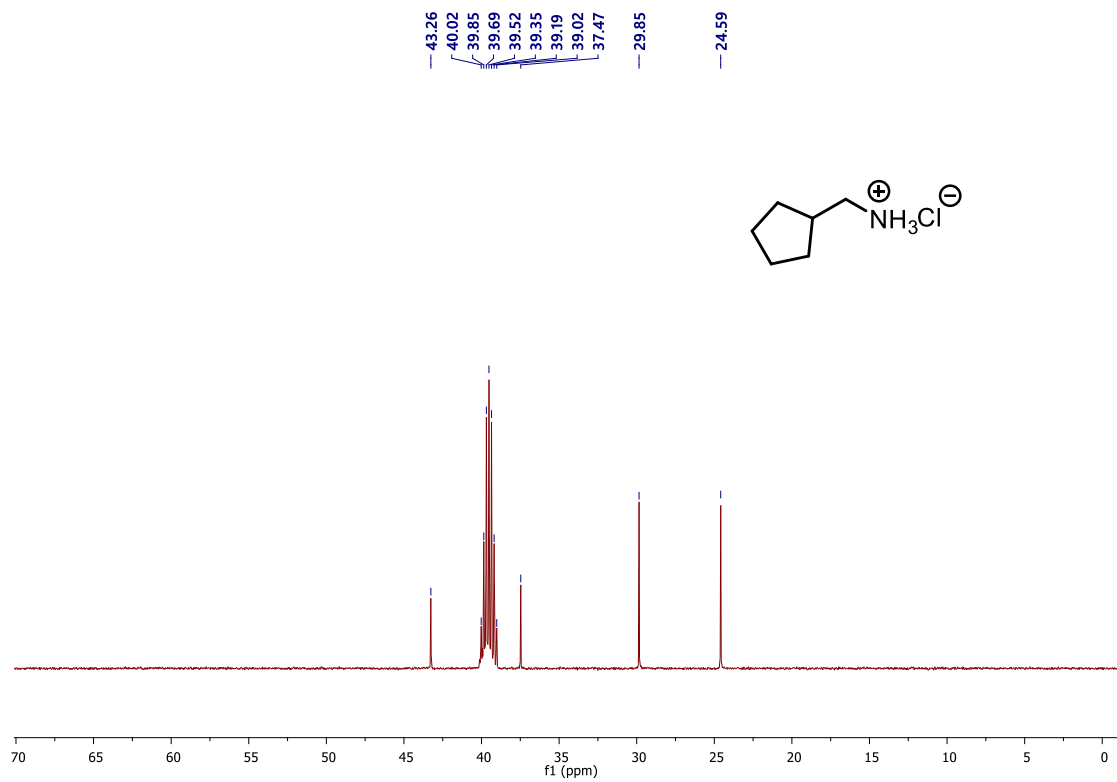

**Fig. S95**  $^{13}\text{C}\{^1\text{H}\}$  NMR spectrum of **4ak** in  $\text{DMSO-d}_6$ . <sup>S25</sup>

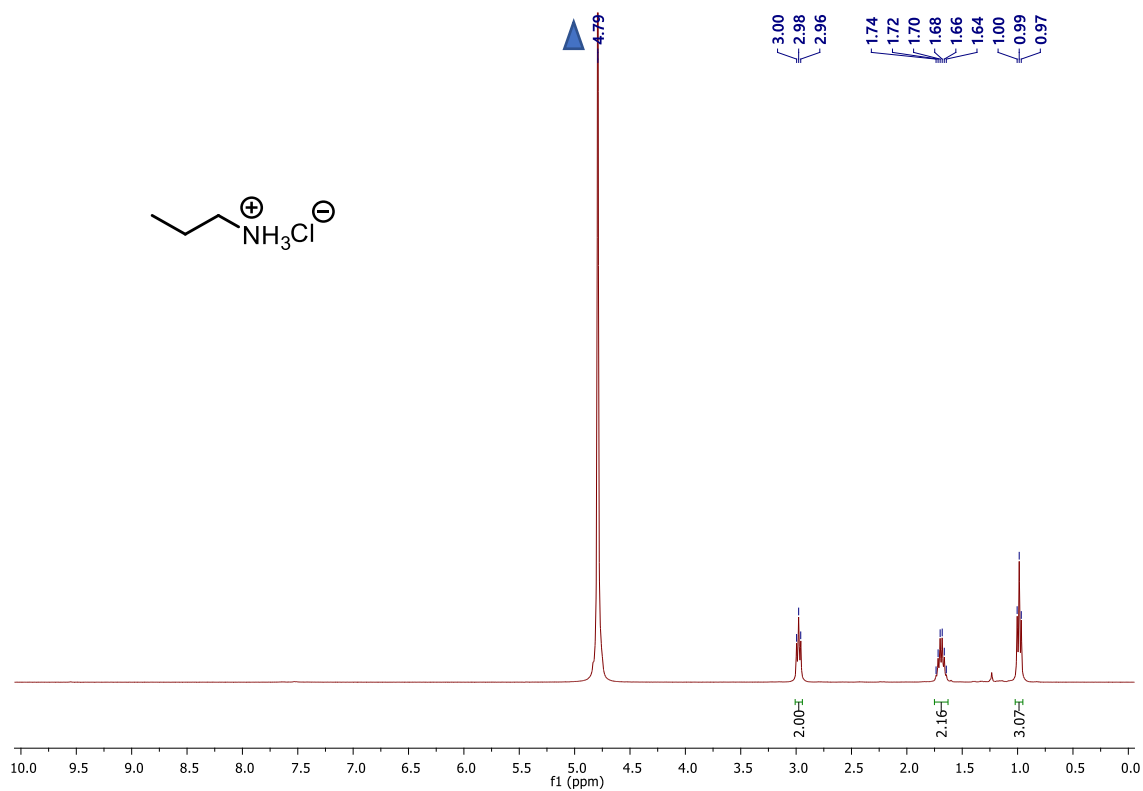

**Fig. S96**  $^1\text{H}$  NMR spectrum of **4al** in  $\text{D}_2\text{O}$ . <sup>S26</sup> ▲ denotes residual peak of  $\text{D}_2\text{O}$ .

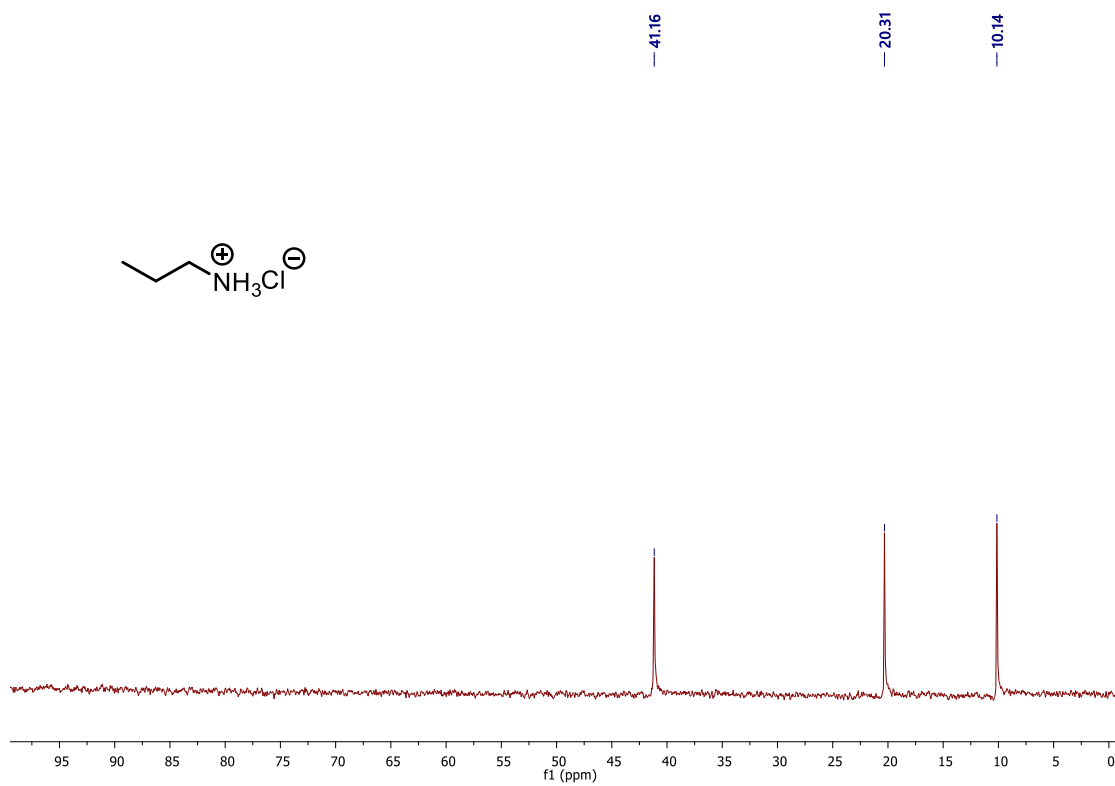

**Fig. S97**  $^{13}\text{C}\{^1\text{H}\}$  NMR spectrum of **4al** in  $\text{D}_2\text{O}$ . <sup>S26</sup>

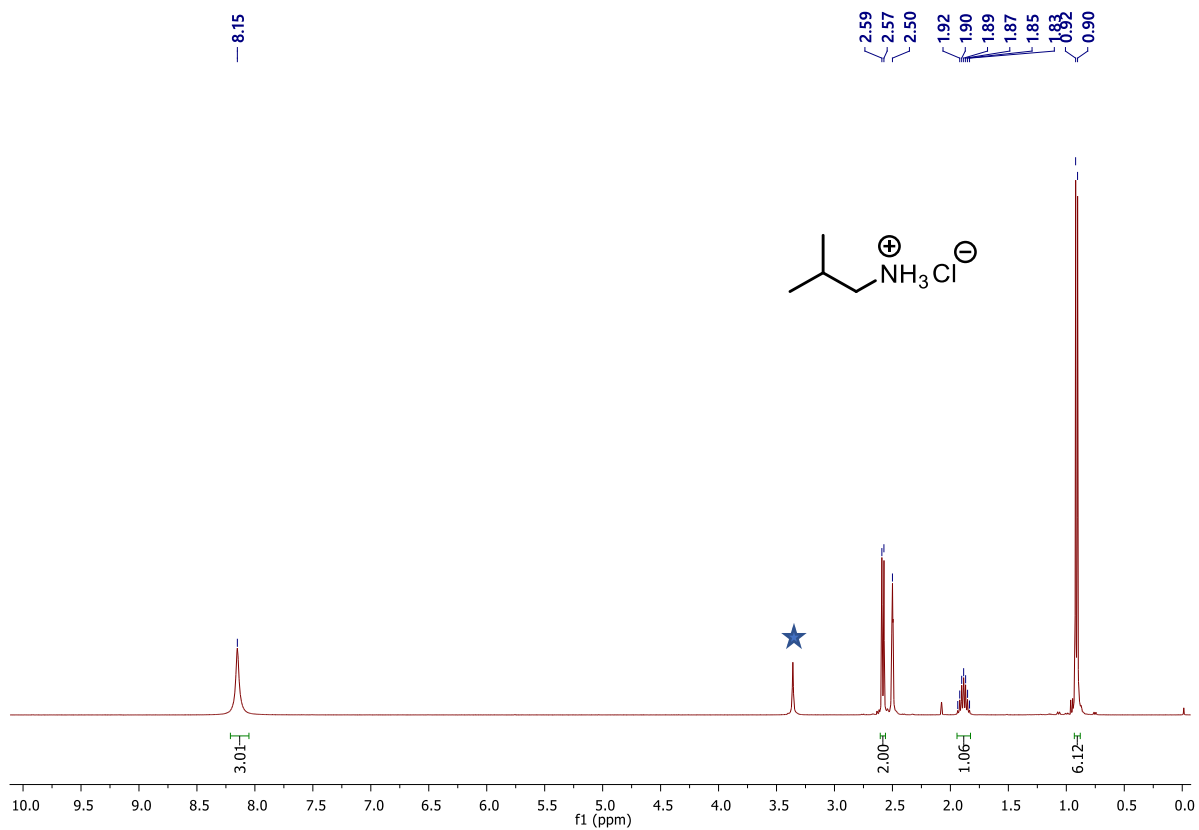

**Fig. S98**  $^1\text{H}$  NMR spectrum of **4am** in  $\text{DMSO-d}_6$ . <sup>S12</sup> ★ denotes moisture peak in  $\text{DMSO-d}_6$ .

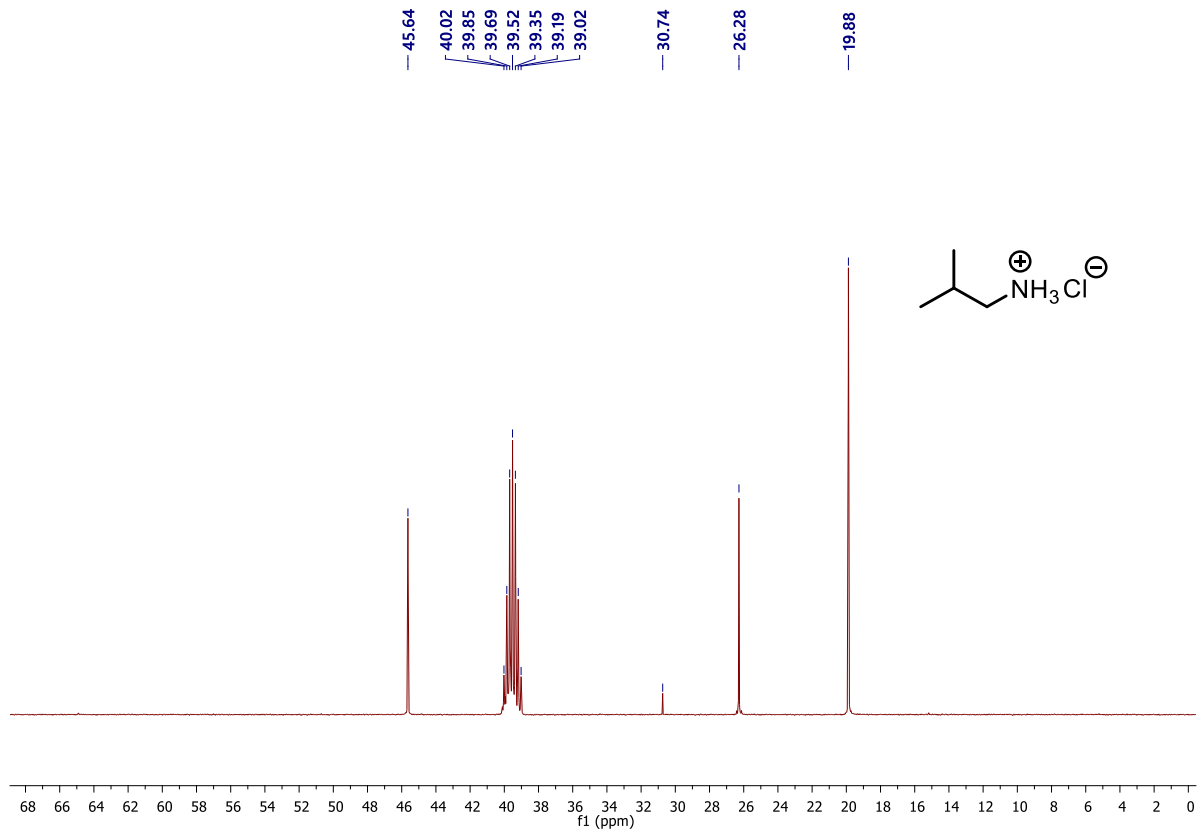

**Fig. S99**  $^{13}\text{C}\{^1\text{H}\}$  NMR spectrum of **4am** in  $\text{DMSO-d}_6$ . <sup>S12</sup>

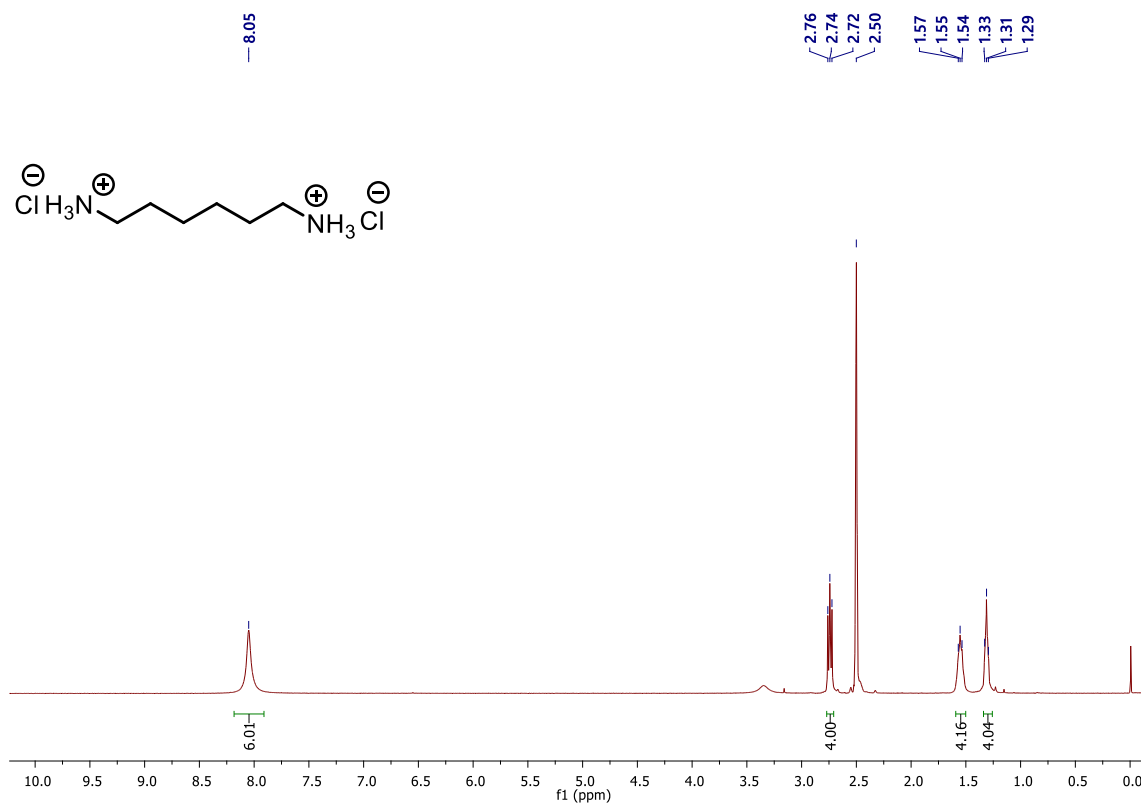

**Fig. S100** <sup>1</sup>H NMR spectrum of **4an** in DMSO-d<sub>6</sub>.<sup>S17</sup>

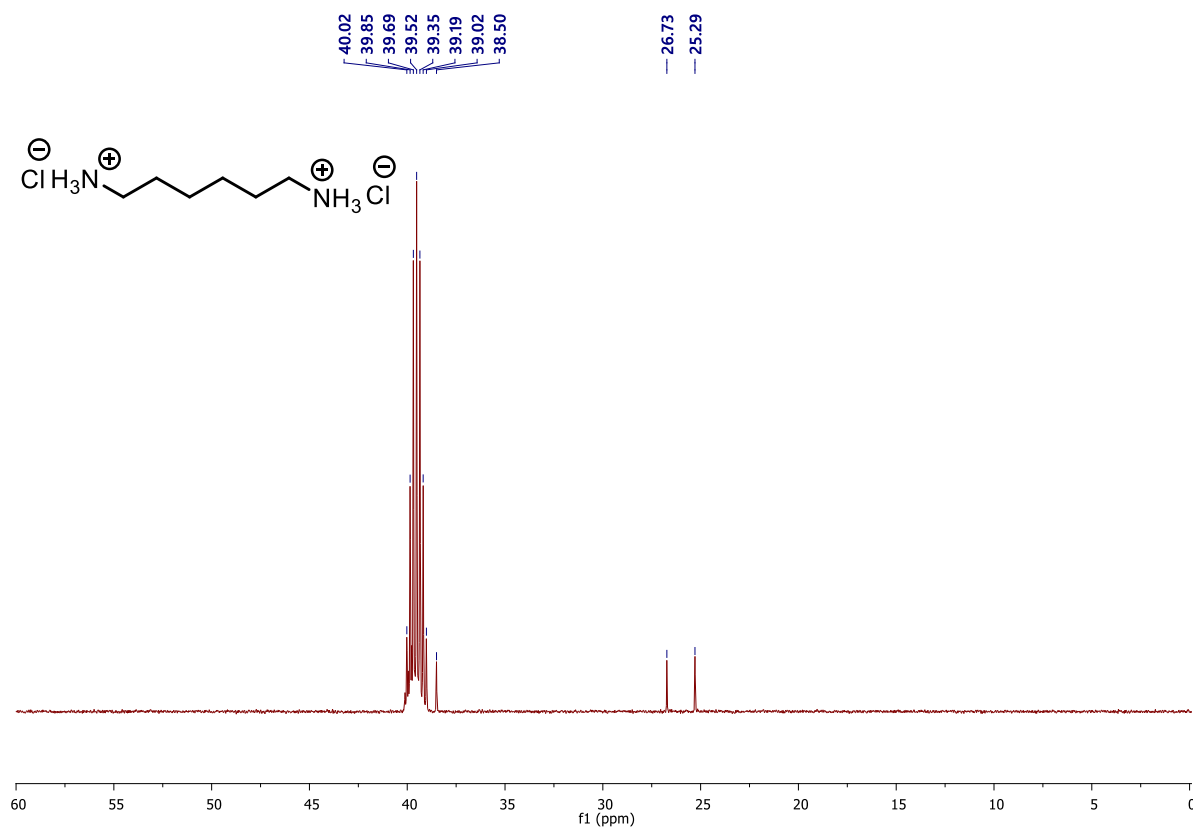

**Fig. S101** <sup>13</sup>C{<sup>1</sup>H} NMR spectrum of **4an** in DMSO-d<sub>6</sub>.<sup>S17</sup>

### 3.3) $^1\text{H}$ and $^{13}\text{C}\{^1\text{H}\}$ NMR Data of N-substituted amide products

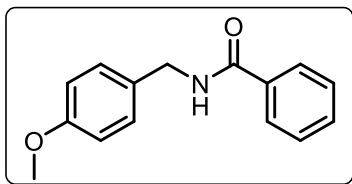

N-(4-methoxybenzyl)benzamide ( $3c'$ )<sup>S27</sup>:  $^1\text{H}$  NMR (500 MHz,  $\text{CDCl}_3$ , 25 °C):  $\delta$  = 7.80 (d,  $J$  = 7.5 Hz, 2H), 7.52-7.49 (m, 1H), 7.44-7.41 (m, 2H), 7.29 (d,  $J$  = 8.0 Hz, 2H), 6.89 (d,  $J$  = 8.0 Hz, 2H), 6.54 (br s, 1H), 4.58 (d,  $J$  = 5.5 Hz, 2H), 3.81 (s, 3H);  $^{13}\text{C}\{^1\text{H}\}$  NMR (125 MHz,  $\text{CDCl}_3$ , 25 °C):  $\delta$  = 167.4, 159.2, 134.6, 131.6, 130.4, 129.4, 128.7, 127.1, 114.3, 55.5, 43.7.

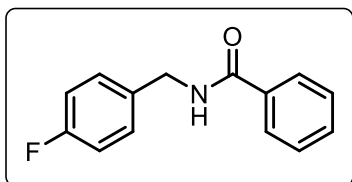

N-(4-fluorobenzyl)benzamide ( $3f'$ )<sup>S27</sup>:  $^1\text{H}$  NMR (400 MHz,  $\text{CDCl}_3$ , 25 °C):  $\delta$  = 7.79 (d,  $J$  = 7.2 Hz, 2H), 7.53-7.49 (m, 1H), 7.45-7.41 (m, 2H), 7.34-7.31 (m, 2H), 7.05-7.01 (m, 2H), 6.43 (br s, 1H), 4.60 (d,  $J$  = 5.6 Hz, 2H);  $^{13}\text{C}\{^1\text{H}\}$  NMR (125 MHz,  $\text{CDCl}_3$ , 25 °C):  $\delta$  = 167.5, 162.4 (d,  $J$  = 244.2 Hz), 134.4, 134.2 (d,  $J$  = 3.4 Hz), 131.8, 129.7 (d,  $J$  = 7.9 Hz), 128.8, 127.1, 115.8 (d,  $J$  = 21.6 Hz), 43.5.

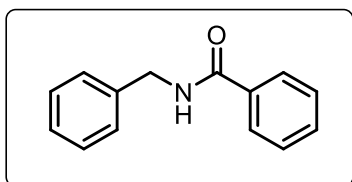

N-benzylbenzamide ( $3h'$ )<sup>S29</sup>:  $^1\text{H}$  NMR (400 MHz,  $\text{CDCl}_3$ , 25 °C):  $\delta$  = 7.71 (d,  $J$  = 7.2 Hz, 2H), 7.42 (t,  $J$  = 7.2 Hz, 1H), 7.33 (t,  $J$  = 7.2 Hz, 2H), 7.27-7.24 (m, 4H), 7.23-7.19 (m, 1H), 6.68 (br s, 1H), 4.54 (d,  $J$  = 6.0 Hz, 2H);  $^{13}\text{C}\{^1\text{H}\}$  NMR (100 MHz,  $\text{CDCl}_3$ , 25 °C):  $\delta$  = 167.5, 138.3, 134.4, 131.6, 128.8, 128.6, 127.9, 127.6, 127.1, 44.1.

### 3.4) $^1\text{H}$ and $^{13}\text{C}$ NMR Spectra of N-substituted amide products

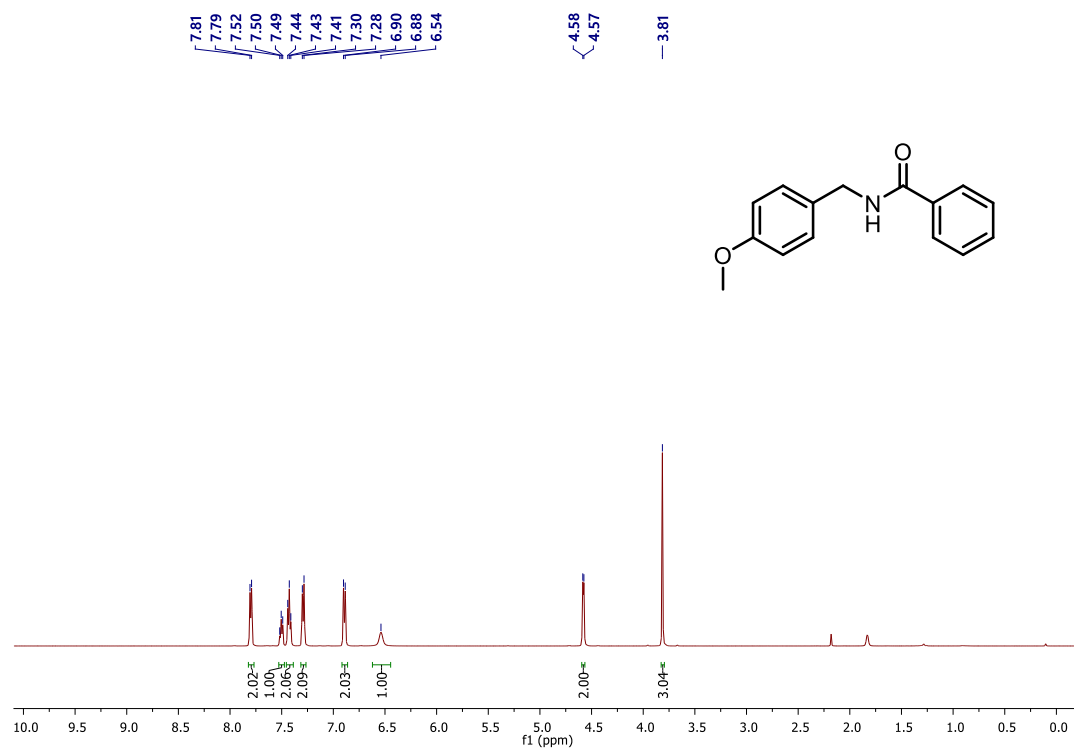

*Fig. S102*  $^1\text{H}$  NMR spectrum of **3c'** in  $\text{CDCl}_3$ .<sup>S27</sup>

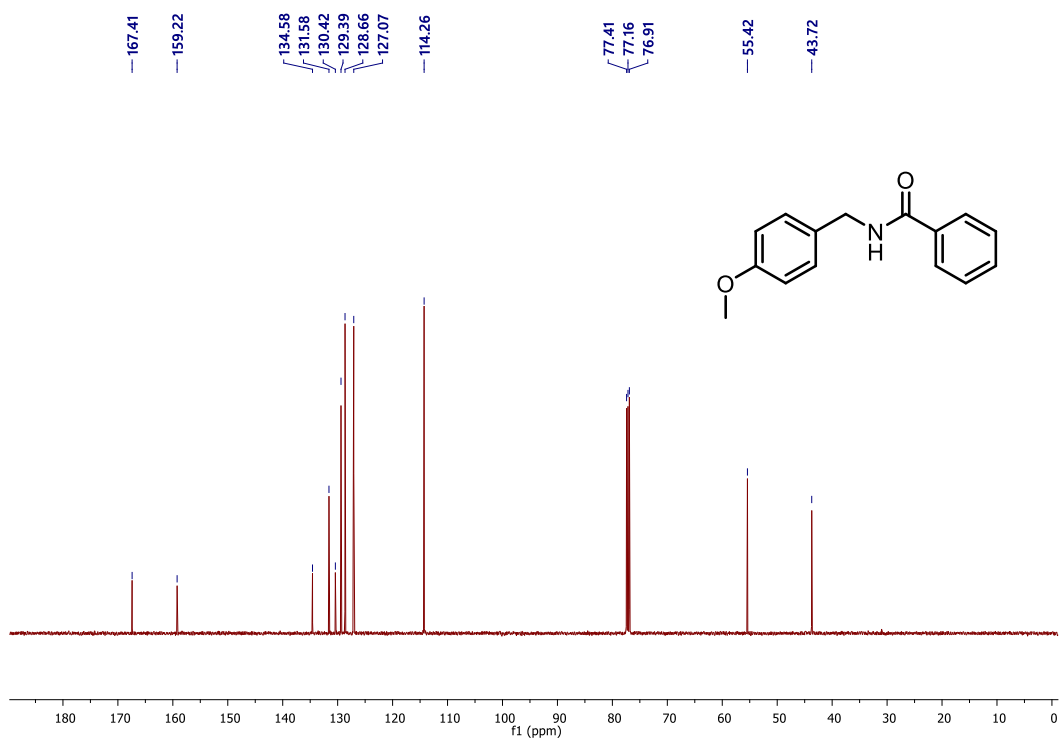

*Fig. S103*  $^{13}\text{C}\{^1\text{H}\}$  NMR spectrum of **3c'** in  $\text{CDCl}_3$ .<sup>S27</sup>

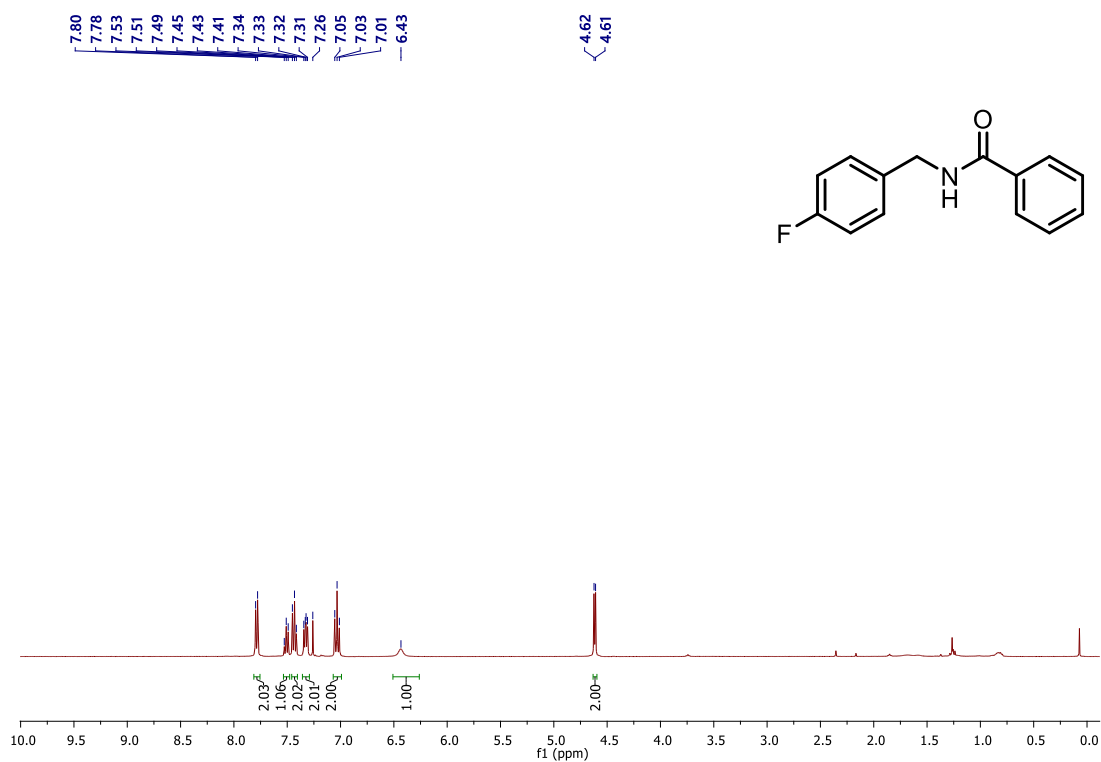

Fig. S104  $^1\text{H NMR}$  spectrum of **3f** in  $\text{CDCl}_3$ .<sup>S27</sup>

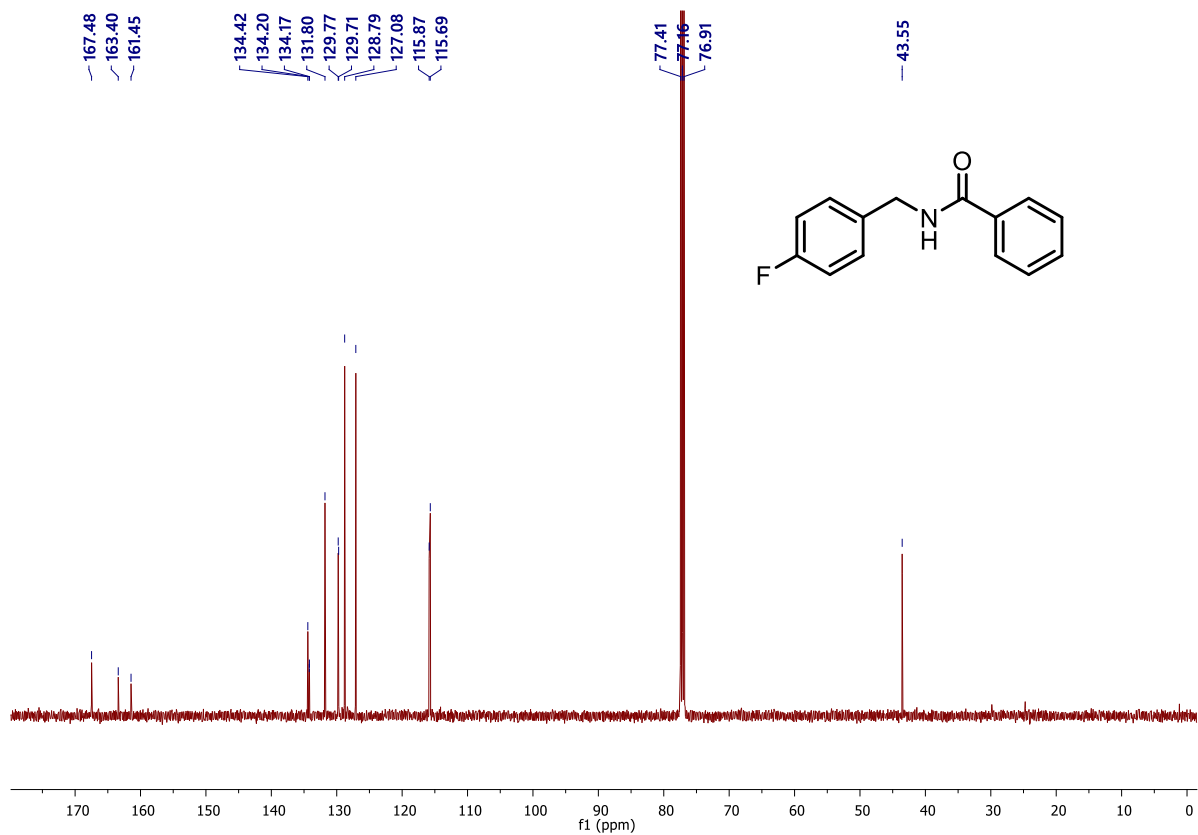

Fig. S105  $^{13}\text{C}\{^1\text{H}\}$  NMR spectrum of **3f** in  $\text{CDCl}_3$ .<sup>S27</sup>



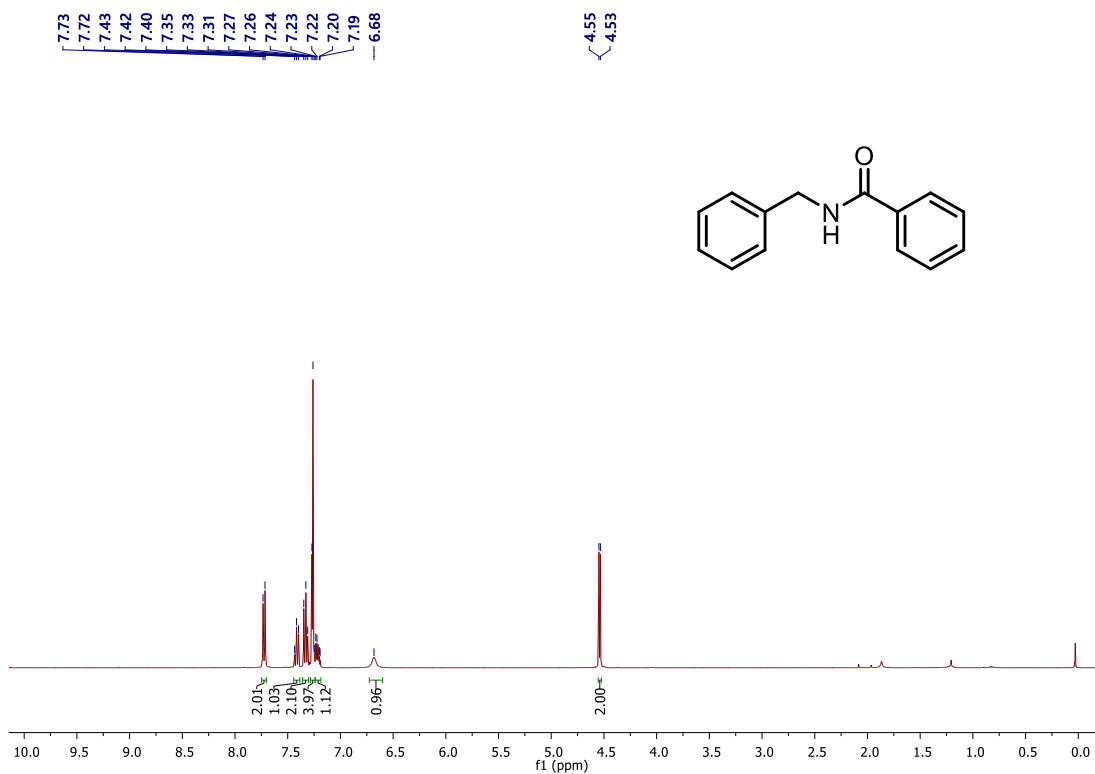

Fig. S106  $^1\text{H}$  NMR spectrum of **3h'** in  $\text{CDCl}_3$ .<sup>S29</sup>

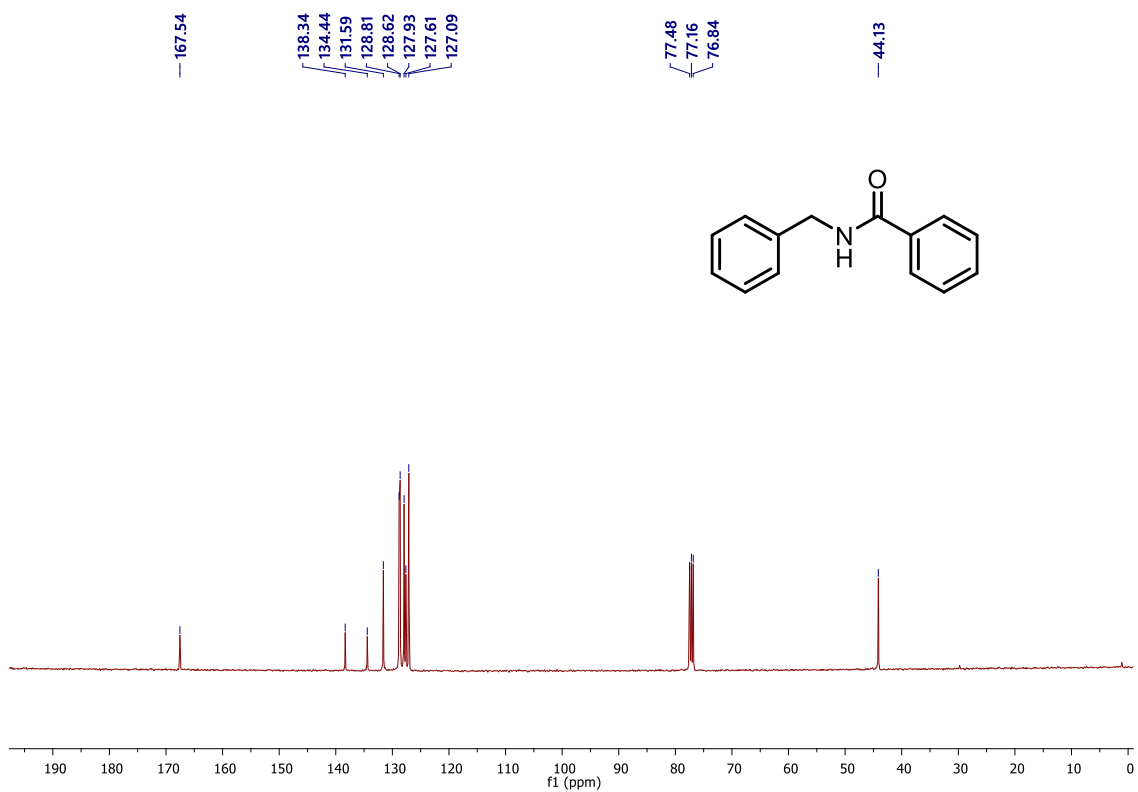

Fig. S107  $^{13}\text{C}\{^1\text{H}\}$  NMR spectrum of **3h'** in  $\text{CDCl}_3$ .<sup>S29</sup>

#### 4) DFT studies

For a better understanding of this reaction, particularly to know the role of the catalyst used here, a density functional theory (DFT) computation was carried out. Gaussian16 program package was employed for this calculation.<sup>S30, S31</sup> M06-2X functional with 6-31G\* basis was chosen for these calculations as this level of theory is proven as excellent for the main group elements.<sup>S32, S33</sup> Geometries of all reactants, products, intermediates and transition states are optimized without any symmetry restriction. All optimized geometries are checked following frequency calculations. Transition states are verified by intrinsic reaction coordinate (IRC) calculations. The mechanistic investigation for the trans isomer is depicted in Fig. S108.

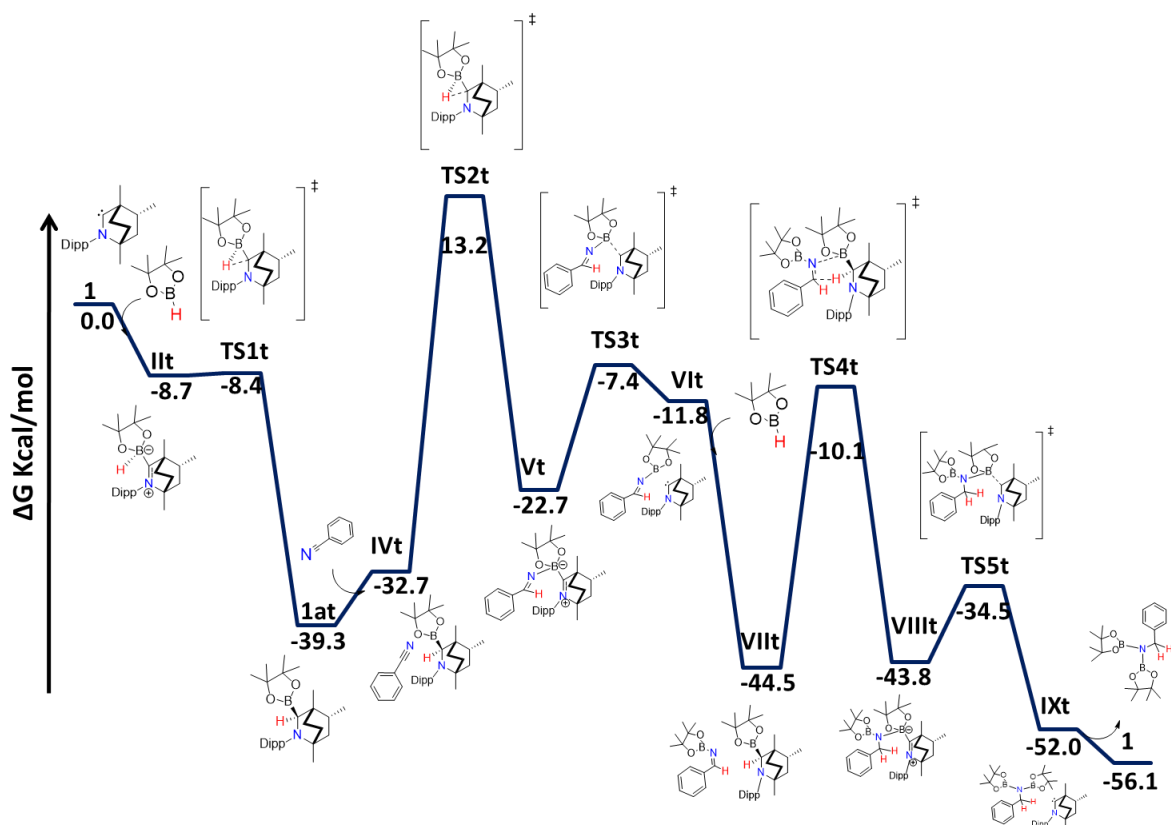

**Fig. S108** Energy profile diagram of the reaction pathway for the trans isomer.

**Z coordinates of the different complexes:**

1

|   |             |             |             |
|---|-------------|-------------|-------------|
| C | -3.10064500 | 0.32652800  | 0.20606200  |
| C | -2.41543600 | -0.79252800 | -0.62808900 |
| C | -0.96331900 | -0.24208700 | 1.43914000  |

|   |             |             |             |
|---|-------------|-------------|-------------|
| C | -2.20538100 | 0.66475900  | 1.42079500  |
| H | -4.05454100 | -0.08651500 | 0.56363000  |
| H | -1.90101300 | 1.71636300  | 1.39700000  |
| H | -2.74292700 | 0.51949700  | 2.36475700  |
| C | -1.00054700 | -0.37955400 | -1.01635100 |
| C | -1.49478100 | -1.68443200 | 1.56237100  |
| H | -0.67251700 | -2.37898700 | 1.76152000  |
| H | -2.15222700 | -1.71892100 | 2.43829500  |
| C | -2.25865800 | -2.04445000 | 0.27513300  |
| H | -1.72100000 | -2.81190900 | -0.29508900 |
| H | -3.25100000 | -2.45342900 | 0.49874700  |
| N | -0.31710500 | -0.12455900 | 0.08269500  |
| C | -3.21802400 | -1.14837900 | -1.87572000 |
| H | -3.19547000 | -0.33119900 | -2.60117400 |
| H | -2.77969200 | -2.02512300 | -2.36301900 |
| H | -4.26296100 | -1.37440200 | -1.62875300 |
| C | -0.01460200 | 0.11656500  | 2.56976300  |
| H | 0.86387600  | -0.53591300 | 2.57785400  |
| H | 0.33092000  | 1.15269100  | 2.49215800  |
| H | -0.53992900 | 0.00029100  | 3.52335700  |
| C | 1.10074000  | 0.16938100  | -0.02923400 |
| C | 1.52618700  | 1.50672100  | -0.06815200 |
| C | 2.00959900  | -0.89609900 | -0.12086100 |
| C | 2.89573900  | 1.76202400  | -0.14680800 |
| C | 3.37116600  | -0.59312200 | -0.20251700 |
| C | 3.81526300  | 0.72175500  | -0.19972700 |
| H | 3.24791900  | 2.78833600  | -0.17563200 |
| H | 4.09284000  | -1.40103200 | -0.27746700 |
| H | 4.87786400  | 0.93755700  | -0.25692400 |
| C | 1.54895800  | -2.33815000 | -0.23859600 |

|     |             |             |             |
|-----|-------------|-------------|-------------|
| C   | 2.41700200  | -3.31958300 | 0.55236300  |
| C   | 1.47065700  | -2.72495600 | -1.72186400 |
| H   | 0.53520500  | -2.40293400 | 0.15940800  |
| H   | 2.52190600  | -3.01094600 | 1.59782200  |
| H   | 1.96490100  | -4.31624600 | 0.53141700  |
| H   | 3.42052600  | -3.41187700 | 0.12443500  |
| H   | 0.78235700  | -2.05318900 | -2.24377600 |
| H   | 2.45890400  | -2.64954600 | -2.18964900 |
| H   | 1.11692600  | -3.75627800 | -1.83179200 |
| C   | 0.52370500  | 2.64262400  | -0.15102300 |
| C   | 0.15119500  | 2.86605200  | -1.62412600 |
| C   | 1.00215400  | 3.94119400  | 0.49998000  |
| H   | -0.38365800 | 2.32784600  | 0.37081600  |
| H   | -0.22520900 | 1.93766500  | -2.06722800 |
| H   | -0.61292500 | 3.64624800  | -1.71671400 |
| H   | 1.03488000  | 3.18253600  | -2.18979300 |
| H   | 1.34942100  | 3.77560000  | 1.52516800  |
| H   | 1.81952500  | 4.39981800  | -0.06614200 |
| H   | 0.18294200  | 4.66625400  | 0.52678000  |
| C   | -3.40328700 | 1.58185000  | -0.61449000 |
| H   | -4.11624000 | 1.38289500  | -1.41895700 |
| H   | -3.83022500 | 2.36079500  | 0.02638500  |
| H   | -2.48574900 | 1.97928900  | -1.06460800 |
|     |             |             |             |
| IIC |             |             |             |
| C   | 1.31219400  | -3.13768400 | 0.24972000  |
| C   | 0.57057200  | -2.47635800 | -0.95007800 |
| C   | 2.52966900  | -0.96324700 | -0.16977000 |
| C   | 2.44874800  | -2.20574600 | 0.72825800  |
| H   | 1.75207100  | -4.06070400 | -0.15074500 |

|   |             |             |             |
|---|-------------|-------------|-------------|
| H | 2.27995200  | -1.89058000 | 1.76357200  |
| H | 3.41897600  | -2.71396100 | 0.70392100  |
| C | 0.14486800  | -1.07332800 | -0.55321900 |
| C | 2.78188700  | -1.43350400 | -1.61629900 |
| H | 2.93724400  | -0.56203800 | -2.25955400 |
| H | 3.71943100  | -2.00001200 | -1.61516800 |
| C | 1.60287500  | -2.29126600 | -2.09397300 |
| H | 1.09169600  | -1.82878400 | -2.94448900 |
| H | 1.93307900  | -3.28604000 | -2.41387700 |
| N | 1.15738100  | -0.34313000 | -0.13886100 |
| C | -0.57046800 | -3.36063300 | -1.44627300 |
| H | -1.37355500 | -3.44594300 | -0.71581900 |
| H | -1.01599500 | -2.94468000 | -2.35350100 |
| H | -0.17059100 | -4.35647400 | -1.67341700 |
| C | 3.62507000  | -0.00141500 | 0.26342500  |
| H | 3.68662800  | 0.86027900  | -0.40588400 |
| H | 3.48047400  | 0.37526000  | 1.27629500  |
| H | 4.57922600  | -0.53594400 | 0.22483600  |
| H | -0.98125600 | -0.48027000 | -2.27153800 |
| C | -3.03873400 | 0.83302200  | -0.26344800 |
| C | -3.30565700 | -0.66159000 | 0.08939000  |
| B | -1.31042100 | -0.47704200 | -1.06128900 |
| O | -1.64188500 | 0.83170400  | -0.51743700 |
| O | -2.46248400 | -1.33873100 | -0.82576200 |
| C | -3.33513600 | 1.82666100  | 0.85114300  |
| H | -3.13626700 | 2.84350600  | 0.49864700  |
| H | -4.38340300 | 1.76871200  | 1.16597500  |
| H | -2.69365100 | 1.64485600  | 1.71587600  |
| C | -3.77602300 | 1.24857300  | -1.54070500 |
| H | -4.85621600 | 1.33577100  | -1.38166500 |

|   |             |             |             |
|---|-------------|-------------|-------------|
| H | -3.39642900 | 2.22292900  | -1.86389300 |
| H | -3.59301800 | 0.52220700  | -2.33869300 |
| C | -2.83987700 | -1.00290400 | 1.50801500  |
| H | -3.46392000 | -0.54600200 | 2.28420700  |
| H | -2.86541600 | -2.09041000 | 1.63499000  |
| H | -1.80698700 | -0.66216100 | 1.64456500  |
| C | -4.74159600 | -1.12228400 | -0.12079300 |
| H | -4.83779100 | -2.17456700 | 0.16461200  |
| H | -5.43750400 | -0.53607900 | 0.49049600  |
| H | -5.02675400 | -1.02973600 | -1.17086100 |
| C | 1.03345800  | 1.04806300  | 0.27211600  |
| C | 0.90354200  | 1.35665300  | 1.63643800  |
| C | 1.11749800  | 2.04212800  | -0.71463600 |
| C | 0.90901700  | 2.70611700  | 1.99705100  |
| C | 1.11446800  | 3.37392400  | -0.29907900 |
| C | 1.02390600  | 3.70884600  | 1.04455700  |
| H | 0.81343300  | 2.97301900  | 3.04580900  |
| H | 1.17486300  | 4.16043500  | -1.04632900 |
| H | 1.02776600  | 4.75094800  | 1.34888100  |
| C | 1.16900600  | 1.74128500  | -2.20467700 |
| C | 2.47623400  | 2.23247300  | -2.83985600 |
| C | -0.03960000 | 2.35673600  | -2.92240800 |
| H | 1.10132600  | 0.65867100  | -2.34609300 |
| H | 3.36068100  | 1.78713800  | -2.37206000 |
| H | 2.49453400  | 1.98388900  | -3.90612200 |
| H | 2.56818900  | 3.32033200  | -2.75047000 |
| H | -0.96451100 | 2.03036400  | -2.44210600 |
| H | 0.00714100  | 3.45156700  | -2.89763100 |
| H | -0.04836400 | 2.04584300  | -3.97222400 |
| C | 0.73001400  | 0.31452200  | 2.73424600  |

|   |             |             |            |
|---|-------------|-------------|------------|
| C | -0.46265100 | 0.64520900  | 3.64445700 |
| C | 1.97761500  | 0.17159600  | 3.61937000 |
| H | 0.52606600  | -0.65010300 | 2.25803400 |
| H | -1.35258700 | 0.90581000  | 3.07039300 |
| H | -0.69987600 | -0.21731200 | 4.27586400 |
| H | -0.22892500 | 1.48438600  | 4.30820600 |
| H | 2.85404500  | -0.18647800 | 3.07472700 |
| H | 2.23492300  | 1.13762200  | 4.06772500 |
| H | 1.78020900  | -0.53432100 | 4.43324100 |
| C | 0.37200200  | -3.51736800 | 1.39499400 |
| H | -0.32413300 | -4.30690900 | 1.10178100 |
| H | 0.94628800  | -3.87641800 | 2.25542000 |
| H | -0.22312900 | -2.65517000 | 1.72032700 |

TS1c

|   |             |            |             |
|---|-------------|------------|-------------|
| C | -1.14628500 | 3.18915300 | 0.34460900  |
| C | -0.41358100 | 2.51257500 | -0.85223400 |
| C | -2.52471200 | 1.13948300 | -0.22034800 |
| C | -2.39911400 | 2.35755200 | 0.71126200  |
| H | -1.46964300 | 4.17040400 | -0.02755400 |
| H | -2.34558100 | 2.00698700 | 1.74865000  |
| H | -3.31088000 | 2.95998600 | 0.62757000  |
| C | -0.09894300 | 1.07806600 | -0.42528600 |
| C | -2.67793000 | 1.66578400 | -1.65599100 |
| H | -2.86116600 | 0.83103900 | -2.33942600 |
| H | -3.56905800 | 2.30265300 | -1.68934000 |
| C | -1.41048700 | 2.45157400 | -2.03559600 |
| H | -0.89675300 | 1.98764500 | -2.88467000 |
| H | -1.65690100 | 3.47907900 | -2.32817400 |
| N | -1.22801300 | 0.40154500 | -0.11421600 |

|   |             |             |             |
|---|-------------|-------------|-------------|
| C | 0.79995800  | 3.33199200  | -1.28078400 |
| H | 1.56552500  | 3.37866800  | -0.50767000 |
| H | 1.26967300  | 2.89595200  | -2.16658100 |
| H | 0.46719800  | 4.34815500  | -1.52425400 |
| C | -3.70863700 | 0.27321200  | 0.17928200  |
| H | -3.81136000 | -0.59983000 | -0.47005500 |
| H | -3.61951000 | -0.08220400 | 1.20946100  |
| H | -4.61935400 | 0.87449800  | 0.09843900  |
| H | 0.63906400  | 0.46802700  | -1.78681900 |
| C | 3.03425500  | -1.01358900 | -0.18730900 |
| C | 3.55286200  | 0.45579600  | -0.07920600 |
| B | 1.30883500  | 0.43722800  | -0.58252600 |
| O | 1.61868400  | -0.85150300 | -0.06469300 |
| O | 2.50956600  | 1.20087900  | -0.69879400 |
| C | 3.51706400  | -1.94591000 | 0.91458600  |
| H | 3.06100800  | -2.93145400 | 0.78179200  |
| H | 4.60628400  | -2.06030300 | 0.87651100  |
| H | 3.23997000  | -1.57511700 | 1.90376600  |
| C | 3.33483600  | -1.62853800 | -1.55556000 |
| H | 4.40529600  | -1.80994000 | -1.69441200 |
| H | 2.80965200  | -2.58493300 | -1.63467600 |
| H | 2.98319500  | -0.97192500 | -2.35888500 |
| C | 3.67580400  | 0.93628000  | 1.36888500  |
| H | 4.50605200  | 0.45439000  | 1.89546700  |
| H | 3.84854800  | 2.01669100  | 1.36169000  |
| H | 2.75098800  | 0.74486100  | 1.92175100  |
| C | 4.85573800  | 0.72474800  | -0.82169300 |
| H | 5.14559400  | 1.77078900  | -0.68458300 |
| H | 5.66366500  | 0.09217200  | -0.43682000 |
| H | 4.74173600  | 0.54261800  | -1.89211400 |



|   |             |             |             |
|---|-------------|-------------|-------------|
| C | -1.21991400 | -0.98980400 | 0.26920100  |
| C | -1.11300300 | -1.34429100 | 1.62229700  |
| C | -1.35625500 | -1.96392100 | -0.73329100 |
| C | -1.19279400 | -2.69562400 | 1.96197100  |
| C | -1.43034200 | -3.30351900 | -0.34860900 |
| C | -1.36164200 | -3.67107400 | 0.98856400  |
| H | -1.11019900 | -2.98620600 | 3.00624100  |
| H | -1.53616300 | -4.06999600 | -1.11214200 |
| H | -1.42534100 | -4.71775300 | 1.27049900  |
| C | -1.37790700 | -1.61849800 | -2.21304600 |
| C | -2.68412500 | -2.04605100 | -2.89183600 |
| C | -0.17045600 | -2.24356500 | -2.92093500 |
| H | -1.27653700 | -0.53383600 | -2.31075800 |
| H | -3.56016800 | -1.58131800 | -2.42790400 |
| H | -2.67106200 | -1.76468800 | -3.95020600 |
| H | -2.81693300 | -3.13204800 | -2.83812200 |
| H | 0.75237700  | -1.94460000 | -2.41901900 |
| H | -0.23086100 | -3.33789200 | -2.91272100 |
| H | -0.12831600 | -1.91600400 | -3.96511300 |
| C | -0.83878000 | -0.32293900 | 2.70877400  |
| C | 0.54514800  | -0.58018800 | 3.31548800  |
| C | -1.92169800 | -0.29965900 | 3.79159100  |
| H | -0.80863800 | 0.66175700  | 2.23789400  |
| H | 1.28161600  | -0.67225600 | 2.51312200  |
| H | 0.83525100  | 0.23713500  | 3.98517600  |
| H | 0.55436500  | -1.51122800 | 3.89377900  |
| H | -2.90871400 | -0.07144900 | 3.37588100  |
| H | -1.99061300 | -1.26626700 | 4.30223000  |
| H | -1.68694900 | 0.45897500  | 4.54582100  |
| C | -0.23333900 | 3.41981000  | 1.55095000  |

|   |             |            |            |
|---|-------------|------------|------------|
| H | 0.53495800  | 4.16759000 | 1.33877400 |
| H | -0.81657600 | 3.77186500 | 2.40820900 |
| H | 0.27683600  | 2.49421900 | 1.84491800 |

**1ac**

|   |             |             |             |
|---|-------------|-------------|-------------|
| C | -1.00136400 | 2.87495300  | 1.17374700  |
| C | -0.46301800 | 2.71950700  | -0.26960500 |
| C | -2.52132600 | 1.16675600  | 0.08688200  |
| C | -2.37045700 | 2.14594700  | 1.26873000  |
| H | -1.16488300 | 3.95158600  | 1.32410300  |
| H | -2.45345100 | 1.61222000  | 2.22211000  |
| H | -3.19982800 | 2.86450500  | 1.23866000  |
| C | -0.15649500 | 1.22668500  | -0.58507100 |
| C | -2.73012000 | 2.05716900  | -1.15906900 |
| H | -2.75058100 | 1.43576000  | -2.06006400 |
| H | -3.71494700 | 2.53258800  | -1.08906000 |
| C | -1.61100800 | 3.11932100  | -1.22079100 |
| H | -1.22026300 | 3.21593500  | -2.24076700 |
| H | -1.98975400 | 4.10748500  | -0.92908400 |
| N | -1.24499200 | 0.41773000  | -0.02499000 |
| C | 0.75553700  | 3.59778000  | -0.53751400 |
| H | 1.57352100  | 3.39848500  | 0.16277700  |
| H | 1.14212500  | 3.42094000  | -1.54744900 |
| H | 0.48830400  | 4.65741200  | -0.45229100 |
| C | -3.70603200 | 0.23337900  | 0.26639200  |
| H | -3.82527800 | -0.42134600 | -0.60376800 |
| H | -3.58992300 | -0.39487500 | 1.15191800  |
| H | -4.61999800 | 0.82382700  | 0.38488300  |
| H | -0.13639800 | 1.19822400  | -1.69341800 |
| C | 2.91185300  | -0.63425900 | 0.62798200  |

|   |             |             |             |
|---|-------------|-------------|-------------|
| C | 3.50679800  | 0.31288100  | -0.46089200 |
| B | 1.28253000  | 0.69095400  | -0.20971900 |
| O | 1.65054100  | 0.00757800  | 0.91898400  |
| O | 2.31682600  | 0.81082300  | -1.10856300 |
| C | 3.72970600  | -0.73180900 | 1.90525100  |
| H | 3.24697800  | -1.42611500 | 2.59904000  |
| H | 4.73409900  | -1.11103900 | 1.68732900  |
| H | 3.81789000  | 0.23898600  | 2.39736600  |
| C | 2.57427300  | -2.02524800 | 0.09492500  |
| H | 3.47755600  | -2.61199000 | -0.09962900 |
| H | 1.96394500  | -2.54671700 | 0.83826100  |
| H | 1.98445200  | -1.96095400 | -0.82661300 |
| C | 4.22681300  | 1.52043700  | 0.13577400  |
| H | 5.18558300  | 1.23764700  | 0.58074500  |
| H | 4.40983900  | 2.24951500  | -0.65829500 |
| H | 3.61114400  | 1.99764800  | 0.90553900  |
| C | 4.37788600  | -0.37663800 | -1.49767700 |
| H | 4.74482700  | 0.35996400  | -2.21786600 |
| H | 5.24219900  | -0.85048700 | -1.01984400 |
| H | 3.81442500  | -1.13740400 | -2.04206400 |
| C | -1.15472200 | -1.00864300 | -0.13288800 |
| C | -1.12644500 | -1.79770400 | 1.04687200  |
| C | -1.01309400 | -1.65245200 | -1.38536700 |
| C | -0.91632500 | -3.17371000 | 0.94797100  |
| C | -0.76928600 | -3.02946600 | -1.43252200 |
| C | -0.71525700 | -3.79350000 | -0.27816100 |
| H | -0.89073900 | -3.76953600 | 1.85726200  |
| H | -0.64096300 | -3.51022400 | -2.39935500 |
| H | -0.53325300 | -4.86272100 | -0.33234200 |
| C | -1.15128900 | -0.93010600 | -2.71682400 |

|     |             |             |             |
|-----|-------------|-------------|-------------|
| C   | -2.28278800 | -1.53118700 | -3.56064400 |
| C   | 0.16926000  | -0.92749800 | -3.49759400 |
| H   | -1.42917400 | 0.10311900  | -2.51452600 |
| H   | -3.22744500 | -1.53448200 | -3.00748800 |
| H   | -2.42198900 | -0.94751700 | -4.47688300 |
| H   | -2.06320900 | -2.56296200 | -3.85407200 |
| H   | 0.97516900  | -0.46019400 | -2.92119000 |
| H   | 0.47595700  | -1.95145500 | -3.74088600 |
| H   | 0.05945700  | -0.37997100 | -4.43996300 |
| C   | -1.31352800 | -1.21882300 | 2.44027800  |
| C   | -0.04899900 | -1.36743700 | 3.29675400  |
| C   | -2.49678800 | -1.86956400 | 3.17307000  |
| H   | -1.51504100 | -0.15262100 | 2.32759000  |
| H   | 0.80009100  | -0.86983000 | 2.82585400  |
| H   | -0.21100400 | -0.92944400 | 4.28821900  |
| H   | 0.20129100  | -2.42610000 | 3.43797000  |
| H   | -3.41444700 | -1.86129700 | 2.57812300  |
| H   | -2.27676400 | -2.91426900 | 3.41931800  |
| H   | -2.69220400 | -1.34511100 | 4.11444300  |
| C   | -0.03857100 | 2.39250600  | 2.25842800  |
| H   | 0.13851400  | 1.31715300  | 2.17728100  |
| H   | 0.92999400  | 2.90213300  | 2.20920100  |
| H   | -0.46373900 | 2.59177600  | 3.24846500  |
| IVc |             |             |             |
| C   | 1.05545400  | -0.83795100 | 3.20163800  |
| C   | 0.07382000  | 0.17633000  | 2.56632200  |
| C   | -0.19669700 | -2.15501700 | 1.43912500  |
| C   | 0.68077100  | -2.26106600 | 2.70290400  |
| H   | 0.88504000  | -0.78935100 | 4.28658400  |

|   |             |             |             |
|---|-------------|-------------|-------------|
| H | 1.58480700  | -2.84462100 | 2.49542000  |
| H | 0.12284300  | -2.81166100 | 3.47181700  |
| C | 0.25586000  | 0.22730300  | 1.02188400  |
| C | -1.56575700 | -1.63204500 | 1.92604300  |
| H | -2.19617600 | -1.42235200 | 1.05453200  |
| H | -2.06914000 | -2.42432300 | 2.49343100  |
| C | -1.34902600 | -0.37769500 | 2.80023700  |
| H | -2.07810900 | 0.40669200  | 2.56460300  |
| H | -1.46886300 | -0.61696400 | 3.86505300  |
| N | 0.43286900  | -1.15199000 | 0.54643400  |
| C | 0.18707700  | 1.57087300  | 3.17508300  |
| H | 1.20117800  | 1.97645400  | 3.09061500  |
| H | -0.49155800 | 2.26503100  | 2.66749700  |
| H | -0.07685300 | 1.54337800  | 4.23894000  |
| C | -0.36858700 | -3.49798400 | 0.75019200  |
| H | -1.03546900 | -3.41348800 | -0.11484000 |
| H | 0.58713300  | -3.89693200 | 0.40499100  |
| H | -0.80160700 | -4.21458700 | 1.45542500  |
| H | -0.69015500 | 0.68326200  | 0.66975300  |
| C | 3.07881300  | 2.00617200  | -0.76658900 |
| C | 2.20463900  | 3.19731100  | -0.26299400 |
| B | 1.34061600  | 1.22494700  | 0.45089800  |
| O | 2.62974300  | 0.93082100  | 0.08672100  |
| O | 1.00314700  | 2.52640600  | 0.16823200  |
| C | 4.57668200  | 2.19338400  | -0.58929700 |
| H | 5.10622500  | 1.32141600  | -0.98410900 |
| H | 4.91842400  | 3.07742900  | -1.13872100 |
| H | 4.84158700  | 2.30818600  | 0.46384300  |
| C | 2.75308200  | 1.58501900  | -2.19852800 |
| H | 3.12276800  | 2.31423400  | -2.92641800 |

|   |             |             |             |
|---|-------------|-------------|-------------|
| H | 3.2225400   | 0.61594900  | -2.39421800 |
| H | 1.67298900  | 1.46015500  | -2.33596100 |
| C | 2.79533300  | 3.88558700  | 0.96589300  |
| H | 3.67230600  | 4.48712400  | 0.70785200  |
| H | 2.03506100  | 4.53946100  | 1.40150100  |
| H | 3.08679800  | 3.14743700  | 1.72059100  |
| C | 1.84099600  | 4.21711600  | -1.32929000 |
| H | 1.22431400  | 5.00461000  | -0.88749300 |
| H | 2.74377400  | 4.67756600  | -1.74531200 |
| H | 1.27497600  | 3.75349200  | -2.14000700 |
| C | 0.67701000  | -1.36988100 | -0.84744400 |
| C | 1.87388200  | -2.02172700 | -1.24876400 |
| C | -0.20502600 | -0.89203700 | -1.84599500 |
| C | 2.16923400  | -2.14515600 | -2.60645000 |
| C | 0.15192700  | -1.01036400 | -3.19470400 |
| C | 1.32855600  | -1.62851400 | -3.58319100 |
| H | 3.09050800  | -2.64113900 | -2.90268100 |
| H | -0.52263500 | -0.62360000 | -3.95456400 |
| H | 1.58361700  | -1.71791400 | -4.63500200 |
| C | -1.56509800 | -0.26811300 | -1.55725900 |
| C | -2.69412500 | -1.06536300 | -2.22350500 |
| C | -1.59813300 | 1.20346900  | -1.99081500 |
| H | -1.75052800 | -0.30965600 | -0.48352900 |
| H | -2.67341200 | -2.11360000 | -1.90682000 |
| H | -3.66764000 | -0.64264100 | -1.95098000 |
| H | -2.61455000 | -1.04403400 | -3.31555600 |
| H | -0.87910700 | 1.80456400  | -1.42318600 |
| H | -1.36074800 | 1.29753700  | -3.05682900 |
| H | -2.59477000 | 1.63040600  | -1.83596200 |
| C | 2.87964000  | -2.59761900 | -0.26392900 |

|   |             |             |             |
|---|-------------|-------------|-------------|
| C | 4.21780700  | -1.84804200 | -0.31340800 |
| C | 3.13289100  | -4.09287400 | -0.51050200 |
| H | 2.46688900  | -2.47266300 | 0.73792900  |
| H | 4.07813400  | -0.78999300 | -0.08746000 |
| H | 4.91771300  | -2.27634700 | 0.41317900  |
| H | 4.67411100  | -1.93605300 | -1.30714000 |
| H | 2.20716400  | -4.67244200 | -0.56825400 |
| H | 3.67416800  | -4.24797700 | -1.45041300 |
| H | 3.74911100  | -4.50823100 | 0.29402500  |
| C | -3.51414000 | 1.99130500  | 0.76477100  |
| C | -4.51613000 | 1.10951600  | 0.22410500  |
| C | -5.25679000 | 1.50475500  | -0.89531800 |
| C | -4.73045400 | -0.14043400 | 0.81446800  |
| C | -6.20688400 | 0.64044800  | -1.42618400 |
| H | -5.07834600 | 2.47880600  | -1.33897900 |
| C | -5.67882600 | -0.99902200 | 0.27042500  |
| H | -4.15614700 | -0.42579200 | 1.68998400  |
| C | -6.41483700 | -0.61056800 | -0.84737500 |
| H | -6.78234200 | 0.94170400  | -2.29519100 |
| H | -5.84327300 | -1.97223300 | 0.72087800  |
| H | -7.15341700 | -1.28484200 | -1.26902700 |
| N | -2.70127900 | 2.69509400  | 1.19462800  |
| C | 2.53007300  | -0.52902500 | 2.94582200  |
| H | 2.76696100  | -0.59685300 | 1.88114700  |
| H | 2.80826900  | 0.47185300  | 3.29353500  |
| H | 3.16017600  | -1.24929600 | 3.47975800  |

**TS2c**

|   |             |             |             |
|---|-------------|-------------|-------------|
| C | -0.72355400 | -1.35715000 | -2.97492500 |
| C | 0.57809000  | -0.82760000 | -2.30353900 |

|   |             |             |             |
|---|-------------|-------------|-------------|
| C | -0.53611200 | -2.64691300 | -0.83256700 |
| C | -1.16087600 | -2.64279300 | -2.24069200 |
| H | -0.44188000 | -1.62431900 | -4.00189800 |
| H | -2.25056500 | -2.72980700 | -2.21014600 |
| H | -0.79941000 | -3.53584600 | -2.76594700 |
| C | 0.24036800  | -0.33272200 | -0.85994100 |
| C | 0.95961300  | -2.97017300 | -1.04978200 |
| H | 1.48884300  | -2.84193000 | -0.09793000 |
| H | 1.05670800  | -4.02541900 | -1.32579100 |
| C | 1.51278000  | -2.04967400 | -2.14933800 |
| H | 2.52722700  | -1.71023100 | -1.91224100 |
| H | 1.57018300  | -2.57483900 | -3.11110800 |
| N | -0.61450500 | -1.26262200 | -0.26342600 |
| C | 1.23553500  | 0.21870800  | -3.20740500 |
| H | 0.68856400  | 1.16447900  | -3.20675300 |
| H | 2.26657100  | 0.42582700  | -2.91067800 |
| H | 1.26464800  | -0.17143100 | -4.23162900 |
| C | -1.15331000 | -3.68654600 | 0.08539600  |
| H | -0.67194100 | -3.68123200 | 1.06837200  |
| H | -2.22178000 | -3.53095100 | 0.22550800  |
| H | -1.01384300 | -4.67526200 | -0.36264200 |
| H | 1.43099300  | -0.34596500 | -0.34101100 |
| C | -1.43040300 | 3.09404200  | -0.83796700 |
| C | -0.82847500 | 3.07907900  | 0.60871600  |
| B | 0.08478300  | 1.36044700  | -0.59241800 |
| O | -0.63576200 | 2.13054200  | -1.54041500 |
| O | -0.32848500 | 1.74588500  | 0.71022000  |
| C | -1.33369500 | 4.43285900  | -1.55704100 |
| H | -1.78404200 | 4.34582800  | -2.55057800 |
| H | -1.87130200 | 5.21173300  | -1.00435100 |



|   |             |             |             |
|---|-------------|-------------|-------------|
| H | -0.29338400 | 4.74060300  | -1.68046100 |
| C | -2.86789300 | 2.59031400  | -0.84787000 |
| H | -3.56532400 | 3.31583100  | -0.41567700 |
| H | -3.16718600 | 2.38698400  | -1.88150700 |
| H | -2.92752100 | 1.66164900  | -0.27397200 |
| C | 0.32735300  | 4.07028200  | 0.78255800  |
| H | -0.03914600 | 5.10200000  | 0.80773900  |
| H | 0.82659400  | 3.85724200  | 1.73320800  |
| H | 1.06468800  | 3.97535700  | -0.01701900 |
| C | -1.84118000 | 3.28899000  | 1.72823600  |
| H | -1.32096100 | 3.26344900  | 2.69096300  |
| H | -2.33877000 | 4.26070100  | 1.63087000  |
| H | -2.59251700 | 2.49631000  | 1.73470900  |
| C | -1.30447400 | -0.96947400 | 0.97937100  |
| C | -2.71796700 | -0.85438900 | 1.01631600  |
| C | -0.56169200 | -0.75095400 | 2.15817200  |
| C | -3.31827800 | -0.37499400 | 2.18377100  |
| C | -1.21206200 | -0.29149900 | 3.30398900  |
| C | -2.57852900 | -0.06630400 | 3.31545300  |
| H | -4.39955800 | -0.26454900 | 2.20766600  |
| H | -0.62926600 | -0.10494900 | 4.20188100  |
| H | -3.06895300 | 0.31296500  | 4.20691600  |
| C | 0.92816700  | -1.02816200 | 2.26909300  |
| C | 1.19133700  | -2.22951400 | 3.18731800  |
| C | 1.71187200  | 0.19618200  | 2.75935800  |
| H | 1.29624200  | -1.29613700 | 1.27881100  |
| H | 0.67365500  | -3.12868900 | 2.83805700  |
| H | 2.26529200  | -2.44499700 | 3.22968500  |
| H | 0.84997900  | -2.02409100 | 4.20771900  |
| H | 1.46736000  | 1.07810900  | 2.16170900  |

|   |             |             |             |
|---|-------------|-------------|-------------|
| H | 1.46964400  | 0.41709600  | 3.80500100  |
| H | 2.78950700  | 0.00486300  | 2.70748900  |
| C | -3.66949300 | -1.36697200 | -0.06321000 |
| C | -4.62934100 | -0.32802100 | -0.65968600 |
| C | -4.52959700 | -2.50968100 | 0.51640600  |
| H | -3.07045900 | -1.76216600 | -0.88126000 |
| H | -4.13094300 | 0.35836000  | -1.34235000 |
| H | -5.41581700 | -0.84336300 | -1.22191100 |
| H | -5.11536100 | 0.26336800  | 0.12418700  |
| H | -3.95282200 | -3.21111000 | 1.12433900  |
| H | -5.31745000 | -2.10079400 | 1.15829900  |
| H | -5.01806600 | -3.06480700 | -0.29161500 |
| C | 2.42299000  | 0.78185300  | -0.37151400 |
| C | 3.77732600  | 0.32358300  | -0.07744000 |
| C | 4.80894400  | 1.26719500  | -0.16441700 |
| C | 4.05889600  | -0.99262300 | 0.29039200  |
| C | 6.11474200  | 0.88453600  | 0.11355000  |
| H | 4.56676300  | 2.28617300  | -0.44789900 |
| C | 5.36870100  | -1.36655700 | 0.57193600  |
| H | 3.25003100  | -1.71395500 | 0.35862100  |
| C | 6.39601500  | -0.43057100 | 0.48229600  |
| H | 6.91515700  | 1.61416300  | 0.04439400  |
| H | 5.58607600  | -2.38969800 | 0.86059100  |
| H | 7.41766200  | -0.72499500 | 0.70074800  |
| N | 1.75505300  | 1.73410800  | -0.65733600 |
| C | -1.84040000 | -0.31741200 | -3.05015600 |
| H | -2.72330400 | -0.74944700 | -3.53621200 |
| H | -2.12649500 | 0.02488500  | -2.05249100 |
| H | -1.53044800 | 0.56739600  | -3.61243600 |

**Vc**

|   |             |             |             |
|---|-------------|-------------|-------------|
| C | -0.94064600 | -1.90749100 | -2.79744800 |
| C | 0.31807500  | -1.32115100 | -2.08446200 |
| C | -1.09834300 | -2.68694000 | -0.39682400 |
| C | -1.66263700 | -2.86164000 | -1.82072300 |
| H | -0.55365500 | -2.50688500 | -3.63011700 |
| H | -2.74805200 | -2.72932900 | -1.83460400 |
| H | -1.48151700 | -3.90578000 | -2.10022400 |
| C | -0.19032700 | -0.51326000 | -0.89248200 |
| C | 0.34718400  | -3.22907300 | -0.42852000 |
| H | 0.81604900  | -3.06630100 | 0.54709300  |
| H | 0.29566800  | -4.31192800 | -0.58139100 |
| C | 1.12807900  | -2.53267800 | -1.55244700 |
| H | 2.11332300  | -2.20313500 | -1.21322200 |
| H | 1.29246400  | -3.20877100 | -2.39982500 |
| N | -0.98255100 | -1.20970500 | -0.10813500 |
| C | 1.14468700  | -0.51342800 | -3.08895400 |
| H | 0.67870700  | 0.45002600  | -3.30711300 |
| H | 2.14730900  | -0.30950900 | -2.71105200 |
| H | 1.23128800  | -1.09192400 | -4.01659200 |
| C | -1.92620900 | -3.40773500 | 0.64914200  |
| H | -1.45896900 | -3.34885200 | 1.63506000  |
| H | -2.93556100 | -3.00143700 | 0.72275200  |
| H | -1.99833500 | -4.46197900 | 0.36551400  |
| H | 2.01049800  | -0.77334500 | 0.74416400  |
| C | -0.43650000 | 3.17130100  | -1.02311900 |
| C | 0.03129100  | 3.01827500  | 0.46678600  |
| B | 0.41245600  | 1.02801200  | -0.60839400 |
| O | -0.01012800 | 1.96105600  | -1.64337800 |
| O | -0.00849800 | 1.60905600  | 0.65039500  |

|   |             |             |             |
|---|-------------|-------------|-------------|
| C | 0.18444800  | 4.35153600  | -1.76343500 |
| H | -0.21130000 | 4.38953000  | -2.78331800 |
| H | -0.05458800 | 5.29976600  | -1.26765400 |
| H | 1.26931000  | 4.24576900  | -1.82453000 |
| C | -1.95770500 | 3.24608500  | -1.11867900 |
| H | -2.34921200 | 4.20718300  | -0.76752900 |
| H | -2.25301300 | 3.11088600  | -2.16456400 |
| H | -2.40215600 | 2.44815600  | -0.51708500 |
| C | 1.45925000  | 3.53363200  | 0.68949700  |
| H | 1.49783600  | 4.62755600  | 0.64571600  |
| H | 1.79505200  | 3.21729200  | 1.68276000  |
| H | 2.15138600  | 3.12070000  | -0.04845300 |
| C | -0.89240400 | 3.65019500  | 1.50334200  |
| H | -0.47148700 | 3.48959900  | 2.50162500  |
| H | -0.99144100 | 4.72978300  | 1.34229000  |
| H | -1.88314300 | 3.19007800  | 1.48109100  |
| C | -1.75848400 | -0.58793300 | 0.97719400  |
| C | -3.06010500 | -0.12748600 | 0.69221900  |
| C | -1.20258000 | -0.45596200 | 2.26131800  |
| C | -3.73828500 | 0.57846700  | 1.68890100  |
| C | -1.93169700 | 0.24460200  | 3.22275100  |
| C | -3.17591700 | 0.78637500  | 2.93912100  |
| H | -4.73637300 | 0.95337800  | 1.47888400  |
| H | -1.50217900 | 0.37634000  | 4.21171900  |
| H | -3.71618300 | 1.34538100  | 3.69688700  |
| C | 0.13648200  | -1.03647700 | 2.68011700  |
| C | -0.03668900 | -2.08569700 | 3.78898000  |
| C | 1.11778500  | 0.04750200  | 3.14644100  |
| H | 0.57238500  | -1.53769000 | 1.81272000  |
| H | -0.73171900 | -2.88344500 | 3.51112200  |

|   |             |             |             |
|---|-------------|-------------|-------------|
| H | 0.93025700  | -2.54038900 | 4.02811700  |
| H | -0.41940400 | -1.62141000 | 4.70392200  |
| H | 1.19755900  | 0.84007100  | 2.40067200  |
| H | 0.77882900  | 0.48824800  | 4.09104000  |
| H | 2.10676000  | -0.39131700 | 3.32203100  |
| C | -3.83368800 | -0.46501300 | -0.57635800 |
| C | -4.35729800 | 0.74458300  | -1.35732200 |
| C | -5.02414300 | -1.38068500 | -0.24099700 |
| H | -3.16687800 | -1.00480800 | -1.24356500 |
| H | -3.55039700 | 1.31689900  | -1.81244100 |
| H | -5.02159700 | 0.40053300  | -2.15749700 |
| H | -4.93173100 | 1.42116100  | -0.71539700 |
| H | -4.74146100 | -2.23993600 | 0.37235100  |
| H | -5.78986500 | -0.82451300 | 0.31045900  |
| H | -5.48341300 | -1.75292800 | -1.16299100 |
| C | 2.54145200  | -0.05747300 | 0.08662000  |
| C | 4.01546500  | -0.23615500 | 0.11646600  |
| C | 4.84985600  | 0.57669600  | -0.65736500 |
| C | 4.57731300  | -1.23557800 | 0.91233100  |
| C | 6.22549000  | 0.39047500  | -0.62765100 |
| H | 4.38765300  | 1.34546200  | -1.26988600 |
| C | 5.95678300  | -1.42423500 | 0.94242100  |
| H | 3.92310300  | -1.86620400 | 1.51303500  |
| C | 6.78216800  | -0.61005500 | 0.17193200  |
| H | 6.87135300  | 1.02440900  | -1.22800800 |
| H | 6.38674400  | -2.20296800 | 1.56519000  |
| H | 7.85844500  | -0.75280700 | 0.19288600  |
| N | 1.95583500  | 0.79863100  | -0.63028300 |
| C | -1.81713200 | -0.79678400 | -3.39280500 |
| H | -2.81654200 | -1.17102400 | -3.64130200 |

|   |             |             |             |
|---|-------------|-------------|-------------|
| H | -1.92160600 | 0.05543100  | -2.71173000 |
| H | -1.36657500 | -0.40923600 | -4.31018400 |

**TS3c**

|   |             |             |             |
|---|-------------|-------------|-------------|
| C | -1.42613000 | -1.74204300 | -2.87629400 |
| C | -0.07091400 | -1.22081300 | -2.29955400 |
| C | -1.23396700 | -2.71877000 | -0.54777100 |
| C | -1.99336300 | -2.78541400 | -1.88783300 |
| H | -1.17281700 | -2.24654700 | -3.81812800 |
| H | -3.06863100 | -2.64849200 | -1.73471600 |
| H | -1.86750300 | -3.80358700 | -2.27464400 |
| C | -0.34876900 | -0.48983000 | -0.98486700 |
| C | 0.18921200  | -3.25107100 | -0.82209500 |
| H | 0.80511500  | -3.09599600 | 0.07094000  |
| H | 0.13251600  | -4.33083400 | -0.99613300 |
| C | 0.76023000  | -2.51113200 | -2.03894300 |
| H | 1.81977200  | -2.27756600 | -1.91303400 |
| H | 0.69247000  | -3.13135300 | -2.94126300 |
| N | -1.04311300 | -1.26786600 | -0.17389600 |
| C | 0.64162700  | -0.30593200 | -3.29081200 |
| H | 0.10218900  | 0.63548600  | -3.41995100 |
| H | 1.63949000  | -0.04284500 | -2.92737800 |
| H | 0.74783600  | -0.79949300 | -4.26466400 |
| C | -1.92036600 | -3.52862200 | 0.53648600  |
| H | -1.37827900 | -3.48137200 | 1.48435600  |
| H | -2.94037900 | -3.18655600 | 0.71107900  |
| H | -1.96385300 | -4.57369500 | 0.21393500  |
| H | 2.15579400  | -0.83902000 | -0.67886100 |
| C | -0.62758300 | 3.28161500  | -1.16972600 |
| C | -0.52433800 | 3.27108400  | 0.39360100  |

|   |             |             |             |
|---|-------------|-------------|-------------|
| B | 0.81047800  | 1.65965500  | -0.48639900 |
| O | 0.49183900  | 2.48192400  | -1.56447100 |
| O | 0.08869100  | 2.00476300  | 0.65879300  |
| C | -0.49816500 | 4.65764700  | -1.80670900 |
| H | -0.58473500 | 4.56626300  | -2.89340100 |
| H | -1.29283800 | 5.32437500  | -1.45325900 |
| H | 0.46981700  | 5.10854600  | -1.57969300 |
| C | -1.88167700 | 2.57820500  | -1.67123400 |
| H | -2.79153200 | 3.14653100  | -1.45079600 |
| H | -1.80549100 | 2.44166200  | -2.75481500 |
| H | -1.94021100 | 1.59163000  | -1.20291400 |
| C | 0.42195100  | 4.35114800  | 0.92046800  |
| H | 0.00131100  | 5.35536900  | 0.80605900  |
| H | 0.60389400  | 4.16657200  | 1.98297200  |
| H | 1.38245800  | 4.30603800  | 0.39736100  |
| C | -1.85638800 | 3.32565500  | 1.12698200  |
| H | -1.67696400 | 3.31515200  | 2.20637200  |
| H | -2.40805900 | 4.23862500  | 0.87497200  |
| H | -2.47017500 | 2.45393600  | 0.88627000  |
| C | -1.50858300 | -0.77432500 | 1.12474700  |
| C | -2.87292400 | -0.46296500 | 1.30331900  |
| C | -0.59115500 | -0.62267200 | 2.18269200  |
| C | -3.28287400 | 0.04663100  | 2.53803300  |
| C | -1.05886500 | -0.12188800 | 3.39917400  |
| C | -2.38860000 | 0.22396800  | 3.58154300  |
| H | -4.32944500 | 0.30258500  | 2.67959900  |
| H | -0.35731900 | 0.00251700  | 4.21824800  |
| H | -2.72753900 | 0.62038800  | 4.53378700  |
| C | 0.87479400  | -1.00995800 | 2.09585500  |
| C | 1.13187800  | -2.34554800 | 2.80872800  |

|   |             |             |             |
|---|-------------|-------------|-------------|
| C | 1.80384800  | 0.06706600  | 2.67062600  |
| H | 1.12493500  | -1.13469400 | 1.04238400  |
| H | 0.53725500  | -3.16390900 | 2.39051500  |
| H | 2.19009900  | -2.61778400 | 2.72683300  |
| H | 0.88448500  | -2.26568800 | 3.87327200  |
| H | 1.56265700  | 1.05105600  | 2.26291400  |
| H | 1.73237000  | 0.10621800  | 3.76336300  |
| H | 2.84367300  | -0.17060000 | 2.42116500  |
| C | -3.95488800 | -0.66924600 | 0.25153400  |
| C | -4.59510900 | 0.65050300  | -0.19745400 |
| C | -5.07628500 | -1.59405000 | 0.75558500  |
| H | -3.49636500 | -1.12888800 | -0.62452200 |
| H | -3.86492800 | 1.33549500  | -0.62740000 |
| H | -5.36673200 | 0.45595700  | -0.95035300 |
| H | -5.07310300 | 1.15584500  | 0.64908000  |
| H | -4.70323200 | -2.51896300 | 1.20164400  |
| H | -5.67856000 | -1.08726200 | 1.51689400  |
| H | -5.74568100 | -1.85548200 | -0.07063100 |
| C | 2.72716900  | 0.06960700  | -0.43650600 |
| C | 4.16386600  | -0.17798000 | -0.17603700 |
| C | 5.03790800  | 0.87937100  | 0.09416000  |
| C | 4.64313300  | -1.48879000 | -0.17217800 |
| C | 6.37683600  | 0.62257600  | 0.35566800  |
| H | 4.63775300  | 1.88870500  | 0.09294000  |
| C | 5.98535100  | -1.74726800 | 0.09328200  |
| H | 3.95530400  | -2.30869400 | -0.37349500 |
| C | 6.85269800  | -0.69040300 | 0.35516600  |
| H | 7.05609600  | 1.44399300  | 0.56257600  |
| H | 6.35345200  | -2.76858100 | 0.09615900  |
| H | 7.90049300  | -0.88750800 | 0.56090600  |



|   |             |             |             |
|---|-------------|-------------|-------------|
| N | 2.18814200  | 1.20114600  | -0.35904300 |
| C | -2.43772900 | -0.64470000 | -3.20642300 |
| H | -3.34696300 | -1.08907700 | -3.62635000 |
| H | -2.72432400 | -0.07256500 | -2.31970700 |
| H | -2.03837700 | 0.05944900  | -3.94177500 |

### **VIc**

|   |             |             |             |
|---|-------------|-------------|-------------|
| C | -1.07545700 | -1.67268400 | -3.06783700 |
| C | 0.07709600  | -1.10525300 | -2.19058600 |
| C | -1.33361200 | -2.76157700 | -0.79121400 |
| C | -1.85381300 | -2.71989600 | -2.24025600 |
| H | -0.60023400 | -2.17194600 | -3.92329100 |
| H | -2.92909000 | -2.51142400 | -2.25210100 |
| H | -1.73227500 | -3.72577200 | -2.65849200 |
| C | -0.51340700 | -0.45393700 | -0.94522100 |
| C | 0.11729400  | -3.27478900 | -0.86063400 |
| H | 0.52455500  | -3.36143700 | 0.15237800  |
| H | 0.10215600  | -4.28454400 | -1.28510000 |
| C | 0.94475100  | -2.30630000 | -1.72776600 |
| H | 1.81316700  | -1.92720700 | -1.17887100 |
| H | 1.34021200  | -2.80809800 | -2.61914300 |
| N | -1.23917700 | -1.34340600 | -0.29561000 |
| C | 0.93661500  | -0.11444100 | -2.97136000 |
| H | 0.38927100  | 0.80711700  | -3.18616700 |
| H | 1.82283500  | 0.16775500  | -2.39528300 |
| H | 1.27310800  | -0.55074600 | -3.92011200 |
| C | -2.21210600 | -3.63344300 | 0.08952700  |
| H | -1.84594700 | -3.67124900 | 1.11924500  |
| H | -3.24473900 | -3.27086100 | 0.10974600  |
| H | -2.21600100 | -4.65124500 | -0.31371800 |

|   |             |             |             |
|---|-------------|-------------|-------------|
| H | 1.92669400  | 0.04856400  | 0.22095400  |
| C | -0.07673500 | 3.84041300  | -0.81301800 |
| C | -0.18784800 | 3.46035100  | 0.71342500  |
| B | 1.68333700  | 2.55162900  | -0.20558900 |
| O | 1.26909400  | 3.44884500  | -1.15240400 |
| O | 0.84423600  | 2.47171500  | 0.87593500  |
| C | -0.23479700 | 5.32541700  | -1.10879800 |
| H | -0.12474300 | 5.49186100  | -2.18394800 |
| H | -1.22870700 | 5.67336400  | -0.80743400 |
| H | 0.51990200  | 5.92199400  | -0.59279800 |
| C | -1.01301000 | 3.02881300  | -1.70512100 |
| H | -2.05705400 | 3.32276100  | -1.55313400 |
| H | -0.74899600 | 3.22032800  | -2.75013100 |
| H | -0.90262500 | 1.95710800  | -1.50234900 |
| C | 0.16212300  | 4.61562800  | 1.64879000  |
| H | -0.59760600 | 5.40260900  | 1.61880800  |
| H | 0.22719600  | 4.23153100  | 2.67038200  |
| H | 1.13121100  | 5.05137900  | 1.38720800  |
| C | -1.50669600 | 2.81514100  | 1.11563800  |
| H | -1.49880600 | 2.60425400  | 2.18997900  |
| H | -2.35538800 | 3.47349200  | 0.89801000  |
| H | -1.63226200 | 1.86479200  | 0.59067300  |
| C | -1.85487400 | -0.96124900 | 0.96429100  |
| C | -3.20595400 | -0.57507500 | 0.97244600  |
| C | -1.08445400 | -0.95345100 | 2.13938100  |
| C | -3.77600500 | -0.17344400 | 2.18108100  |
| C | -1.70571400 | -0.56263800 | 3.32900600  |
| C | -3.03702100 | -0.17318800 | 3.35664700  |
| H | -4.81420100 | 0.14543800  | 2.19978800  |
| H | -1.12718000 | -0.55650600 | 4.24848400  |

|   |             |             |             |
|---|-------------|-------------|-------------|
| H | -3.49664900 | 0.13452100  | 4.29090800  |
| C | 0.38286400  | -1.34513200 | 2.18413900  |
| C | 0.57871600  | -2.68852800 | 2.89909400  |
| C | 1.23597000  | -0.25912500 | 2.85161100  |
| H | 0.73096700  | -1.45149600 | 1.15210400  |
| H | 0.00960900  | -3.49550100 | 2.42622100  |
| H | 1.63799700  | -2.97045300 | 2.89842200  |
| H | 0.25271500  | -2.61962400 | 3.94288500  |
| H | 1.06187600  | 0.71772900  | 2.39216200  |
| H | 1.01422100  | -0.18762700 | 3.92215200  |
| H | 2.30018500  | -0.50562300 | 2.75693200  |
| C | -4.03710700 | -0.51508600 | -0.29652400 |
| C | -4.12946600 | 0.92988300  | -0.79939400 |
| C | -5.43179400 | -1.12538100 | -0.12622300 |
| H | -3.51809000 | -1.08978700 | -1.06548000 |
| H | -3.13179800 | 1.33092900  | -1.00093900 |
| H | -4.71920700 | 0.98200000  | -1.72139200 |
| H | -4.60596300 | 1.57008200  | -0.04775800 |
| H | -5.38290800 | -2.13674900 | 0.29018400  |
| H | -6.05922700 | -0.52057100 | 0.53650300  |
| H | -5.93784000 | -1.17624600 | -1.09551400 |
| C | 2.87849700  | 0.56460100  | 0.01196000  |
| C | 4.08327200  | -0.28899100 | 0.08471500  |
| C | 5.33673800  | 0.20990700  | -0.28366300 |
| C | 3.97131800  | -1.60407700 | 0.54334300  |
| C | 6.45987100  | -0.60113300 | -0.19505400 |
| H | 5.39809100  | 1.23510700  | -0.63562600 |
| C | 5.09806200  | -2.41643900 | 0.63613900  |
| H | 2.99364400  | -1.98658800 | 0.83490300  |
| C | 6.34230400  | -1.91446500 | 0.26493000  |

|   |             |             |             |
|---|-------------|-------------|-------------|
| H | 7.43229100  | -0.21449300 | -0.48423800 |
| H | 5.00598800  | -3.43626400 | 0.99654400  |
| H | 7.22326700  | -2.54556800 | 0.33295700  |
| N | 2.91885000  | 1.80081900  | -0.27667600 |
| C | -1.99946900 | -0.58072500 | -3.61336200 |
| H | -2.82400100 | -1.02685600 | -4.18003500 |
| H | -2.43069000 | 0.01442300  | -2.80029000 |
| H | -1.46685400 | 0.10259400  | -4.28027400 |

### VIIc

|   |             |             |             |
|---|-------------|-------------|-------------|
| C | 0.55743100  | -2.13592000 | -2.04906700 |
| C | 0.26638400  | -0.62222800 | -1.90734200 |
| C | 2.77578000  | -1.00000000 | -2.49465800 |
| C | 1.97743600  | -2.31029600 | -2.65587200 |
| H | -0.18317100 | -2.52315700 | -2.76389300 |
| H | 2.50048400  | -3.14171000 | -2.16987400 |
| H | 1.92043700  | -2.55713100 | -3.72400600 |
| C | 1.23389300  | 0.02330800  | -0.87371800 |
| C | 2.13552400  | -0.00642700 | -3.49009500 |
| H | 2.58777800  | 0.98315400  | -3.36812200 |
| H | 2.37193100  | -0.33055800 | -4.50994700 |
| C | 0.60828400  | 0.02947000  | -3.26423500 |
| H | 0.23585200  | 1.06054000  | -3.27373900 |
| H | 0.07946700  | -0.50777000 | -4.06214100 |
| N | 2.57357600  | -0.53098000 | -1.10141800 |
| C | -1.18733100 | -0.33061000 | -1.55045400 |
| H | -1.48925200 | -0.79018700 | -0.60214200 |
| H | -1.35220400 | 0.74763400  | -1.44142300 |
| H | -1.86747200 | -0.69856800 | -2.32742100 |
| C | 4.24881000  | -1.18546500 | -2.81600100 |

|   |             |             |             |
|---|-------------|-------------|-------------|
| H | 4.78954200  | -0.23563500 | -2.74080400 |
| H | 4.72032300  | -1.90042400 | -2.13852000 |
| H | 4.35335200  | -1.56447000 | -3.83751400 |
| H | 1.17600600  | 1.10490600  | -1.11108100 |
| C | 0.82838000  | -0.31499600 | 2.88207100  |
| C | -0.36043200 | 0.61991900  | 2.49848600  |
| B | 0.78391300  | -0.01604400 | 0.64024200  |
| O | 1.15569000  | -0.91208200 | 1.60663100  |
| O | -0.01457800 | 0.98629600  | 1.14308500  |
| C | 0.48126000  | -1.41357700 | 3.87266000  |
| H | 1.37324400  | -2.00765100 | 4.09186200  |
| H | 0.12018500  | -0.97988400 | 4.81155800  |
| H | -0.28669800 | -2.07950600 | 3.47396400  |
| C | 2.07395700  | 0.44666300  | 3.33117800  |
| H | 1.94125900  | 0.88474300  | 4.32545500  |
| H | 2.91921800  | -0.24778700 | 3.35687900  |
| H | 2.32495700  | 1.24245400  | 2.62059800  |
| C | -1.69805100 | -0.11462600 | 2.43638100  |
| H | -2.07041100 | -0.35567100 | 3.43687000  |
| H | -2.43377300 | 0.51285100  | 1.92515500  |
| H | -1.59926500 | -1.04777700 | 1.86877700  |
| C | -0.47491000 | 1.88792500  | 3.32766000  |
| H | -1.32496000 | 2.48042000  | 2.97578200  |
| H | -0.63898000 | 1.64449700  | 4.38295100  |
| H | 0.42817800  | 2.49699000  | 3.24217700  |
| C | 3.62932100  | -0.12502800 | -0.22212400 |
| C | 4.30504800  | -1.09995500 | 0.55753300  |
| C | 3.96312300  | 1.23887700  | -0.04245100 |
| C | 5.24018900  | -0.69121800 | 1.50943000  |
| C | 4.88156700  | 1.60317900  | 0.94808100  |

|   |             |             |             |
|---|-------------|-------------|-------------|
| C | 5.51802000  | 0.65147400  | 1.72815900  |
| H | 5.74785500  | -1.44501500 | 2.10655800  |
| H | 5.11352600  | 2.65579000  | 1.09194400  |
| H | 6.23397500  | 0.94993800  | 2.48819000  |
| C | 3.39777800  | 2.35680300  | -0.90486300 |
| C | 4.51344800  | 3.12670700  | -1.62290400 |
| C | 2.51768700  | 3.30955100  | -0.08530800 |
| H | 2.78062000  | 1.90718900  | -1.68109900 |
| H | 5.14039800  | 2.45045900  | -2.21271900 |
| H | 4.08294700  | 3.87405200  | -2.29798400 |
| H | 5.16232000  | 3.65237100  | -0.91472800 |
| H | 1.70515800  | 2.76908300  | 0.41356300  |
| H | 3.11030300  | 3.81741500  | 0.68470700  |
| H | 2.07575500  | 4.07743600  | -0.73028000 |
| C | 4.06147500  | -2.59392400 | 0.41592800  |
| C | 3.44174400  | -3.19478400 | 1.68451700  |
| C | 5.35442500  | -3.35182500 | 0.07812600  |
| H | 3.35089500  | -2.73422400 | -0.39993000 |
| H | 2.49519500  | -2.70723800 | 1.92250600  |
| H | 3.26371700  | -4.26736100 | 1.54643600  |
| H | 4.11901100  | -3.07730900 | 2.53939300  |
| H | 5.88282300  | -2.91837300 | -0.77577700 |
| H | 6.04555200  | -3.34386200 | 0.92826400  |
| H | 5.12933700  | -4.39880200 | -0.15134900 |
| C | 0.41377500  | -2.92625500 | -0.74884300 |
| H | 1.17716100  | -2.63187900 | -0.02461200 |
| H | -0.56700800 | -2.78145300 | -0.28301800 |
| H | 0.53042500  | -3.99762300 | -0.94786400 |
| C | -4.78343000 | -2.36767400 | -0.76378700 |
| C | -5.52982000 | -2.05225700 | 0.57352900  |

|   |             |             |             |
|---|-------------|-------------|-------------|
| B | -4.42609300 | -0.22191500 | -0.15723400 |
| O | -4.47296100 | -1.04834800 | -1.25752100 |
| O | -4.90982000 | -0.81881900 | 0.98628800  |
| C | -5.61339800 | -3.10109100 | -1.80466200 |
| H | -5.00728400 | -3.27637900 | -2.69777800 |
| H | -5.94429700 | -4.07119000 | -1.41836400 |
| H | -6.48989200 | -2.51896100 | -2.09565600 |
| C | -3.45502200 | -3.08503100 | -0.53451600 |
| H | -3.60456500 | -4.12726300 | -0.23631300 |
| H | -2.87247500 | -3.06301900 | -1.46049300 |
| H | -2.87413000 | -2.57902700 | 0.24411700  |
| C | -7.01492500 | -1.76185000 | 0.36267600  |
| H | -7.57102700 | -2.67064100 | 0.11362600  |
| H | -7.42550900 | -1.34143700 | 1.28444000  |
| H | -7.15849700 | -1.03290500 | -0.44134000 |
| C | -5.34194200 | -3.08816600 | 1.67046900  |
| H | -5.90270200 | -2.78540600 | 2.55910800  |
| H | -5.71452300 | -4.06560600 | 1.34545000  |
| H | -4.29033000 | -3.18451400 | 1.94777100  |
| C | -3.83445900 | 4.64517400  | -0.86455200 |
| C | -3.34083000 | 3.40530500  | -0.45556900 |
| C | -2.04095700 | 3.30550900  | 0.05276800  |
| C | -1.25088300 | 4.44264900  | 0.15722600  |
| C | -1.74908800 | 5.68229700  | -0.24888300 |
| C | -3.03999700 | 5.78362900  | -0.76188600 |
| H | -4.84496600 | 4.71605800  | -1.26098300 |
| H | -1.65964000 | 2.33444300  | 0.35659900  |
| H | -0.24407400 | 4.36028500  | 0.55622900  |
| H | -1.12919800 | 6.57009800  | -0.16611200 |
| H | -3.42659000 | 6.74693700  | -1.07953800 |

|   |             |            |             |
|---|-------------|------------|-------------|
| C | -4.19674800 | 2.20490100 | -0.55317200 |
| N | -3.82458900 | 1.06791400 | -0.15163700 |
| H | -5.19004400 | 2.38170800 | -0.99738800 |

#### TS4c

|   |             |             |             |
|---|-------------|-------------|-------------|
| C | 0.98657200  | -2.20936800 | -2.58762900 |
| C | 0.08930400  | -0.96662100 | -2.31897200 |
| C | 2.59132600  | -0.30201200 | -2.40493100 |
| C | 2.38719100  | -1.71324400 | -2.98822600 |
| H | 0.55143200  | -2.70675600 | -3.46451600 |
| H | 3.17465400  | -2.40868000 | -2.68593500 |
| H | 2.46471100  | -1.63390400 | -4.08035000 |
| C | 0.57120300  | -0.21236300 | -1.01350400 |
| C | 1.74565100  | 0.64021500  | -3.29496900 |
| H | 1.67697600  | 1.61954000  | -2.80479200 |
| H | 2.25294800  | 0.78849800  | -4.25416500 |
| C | 0.35385400  | 0.01209800  | -3.48845000 |
| H | -0.42345200 | 0.78451800  | -3.51786600 |
| H | 0.29376300  | -0.53477500 | -4.43823000 |
| N | 2.00118100  | -0.24208900 | -1.02852200 |
| C | -1.36438500 | -1.44864600 | -2.34439200 |
| H | -1.61544800 | -2.00881100 | -1.43760500 |
| H | -2.08714500 | -0.64020800 | -2.47642600 |
| H | -1.49665400 | -2.11831500 | -3.20347600 |
| C | 4.05584900  | 0.10111500  | -2.44967300 |
| H | 4.21875800  | 1.11227000  | -2.07170100 |
| H | 4.67733000  | -0.57757500 | -1.86821800 |
| H | 4.39365000  | 0.05912900  | -3.49016500 |
| H | 0.12536600  | 0.88307600  | -1.21864200 |
| C | -0.35390200 | -1.60414400 | 2.39928100  |



|   |             |             |            |
|---|-------------|-------------|------------|
| C | -0.13621500 | -0.08421200 | 2.74338000 |
| B | -0.28296300 | -0.32517200 | 0.46243200 |
| O | -0.58528900 | -1.60490600 | 0.98780300 |
| O | 0.27465300  | 0.47696000  | 1.49878700 |
| C | -1.54318100 | -2.25394500 | 3.10063200 |
| H | -1.62018300 | -3.29641800 | 2.77626900 |
| H | -1.40713300 | -2.24134300 | 4.18834700 |
| H | -2.47792500 | -1.75540400 | 2.84218900 |
| C | 0.89622600  | -2.43638100 | 2.65639000 |
| H | 1.11158300  | -2.53569300 | 3.72560400 |
| H | 0.73861000  | -3.43621500 | 2.24032600 |
| H | 1.75998700  | -1.98154900 | 2.16463400 |
| C | -1.42662500 | 0.60069800  | 3.20747400 |
| H | -1.74786100 | 0.22452200  | 4.18426300 |
| H | -1.23811600 | 1.67528300  | 3.30119100 |
| H | -2.23973000 | 0.44407300  | 2.49165600 |
| C | 0.96368900  | 0.18175100  | 3.76599500 |
| H | 1.04744000  | 1.26031200  | 3.93607500 |
| H | 0.73548700  | -0.29930000 | 4.72413800 |
| H | 1.93149000  | -0.17383300 | 3.40454000 |
| C | 2.86214900  | 0.02354300  | 0.10965400 |
| C | 3.70033800  | -0.99762800 | 0.63429900 |
| C | 2.93589600  | 1.31984000  | 0.67422600 |
| C | 4.49297100  | -0.72225400 | 1.75438900 |
| C | 3.77379800  | 1.54858100  | 1.76656100 |
| C | 4.53476300  | 0.53538600  | 2.32848300 |
| H | 5.11371500  | -1.51675600 | 2.16062000 |
| H | 3.82818200  | 2.54496500  | 2.19186100 |
| H | 5.16652200  | 0.73075100  | 3.18987500 |
| C | 2.16890900  | 2.51373800  | 0.12951100 |

|   |             |             |             |
|---|-------------|-------------|-------------|
| C | 3.04495300  | 3.39097300  | -0.77650800 |
| C | 1.58454800  | 3.38700600  | 1.24227800  |
| H | 1.33416700  | 2.14274200  | -0.46586500 |
| H | 3.39664200  | 2.85873700  | -1.66372900 |
| H | 2.47196300  | 4.26275000  | -1.11404200 |
| H | 3.92316800  | 3.75298500  | -0.22951300 |
| H | 0.97105100  | 2.78627200  | 1.91764700  |
| H | 2.36980400  | 3.88940400  | 1.81706000  |
| H | 0.96559300  | 4.17061700  | 0.80033500  |
| C | 3.92383000  | -2.37190400 | 0.00834300  |
| C | 3.52459900  | -3.56263500 | 0.89058800  |
| C | 5.40636000  | -2.56570800 | -0.37164700 |
| H | 3.32377900  | -2.42599700 | -0.89322700 |
| H | 2.44547000  | -3.66764500 | 0.98132500  |
| H | 3.91485600  | -4.48717700 | 0.45015000  |
| H | 3.94470500  | -3.47051700 | 1.89865800  |
| H | 5.85451100  | -1.68513000 | -0.83715300 |
| H | 6.00187400  | -2.79670100 | 0.51837400  |
| H | 5.50869000  | -3.41148000 | -1.06046100 |
| C | 0.95699900  | -3.21316800 | -1.43383100 |
| H | 1.15067400  | -2.73048600 | -0.47288900 |
| H | -0.02675300 | -3.68632200 | -1.35792300 |
| H | 1.69917200  | -4.00531900 | -1.58950000 |
| C | -5.07586900 | -0.78135400 | -0.92535100 |
| C | -4.80894400 | -1.42390000 | 0.47401100  |
| B | -2.98155600 | -0.29020800 | -0.20336400 |
| O | -3.99502400 | 0.16732900  | -1.02784600 |
| O | -3.37474100 | -1.34793000 | 0.57928500  |
| C | -6.39612800 | -0.03702300 | -1.04542500 |
| H | -6.49567800 | 0.37253100  | -2.05458500 |

|   |             |             |             |
|---|-------------|-------------|-------------|
| H | -7.23721300 | -0.71552500 | -0.86642500 |
| H | -6.45151000 | 0.78974600  | -0.33469300 |
| C | -4.92228900 | -1.78070100 | -2.07032800 |
| H | -5.76201300 | -2.48171000 | -2.10222700 |
| H | -4.88982500 | -1.23139900 | -3.01561700 |
| H | -3.99365500 | -2.35109400 | -1.97237400 |
| C | -5.38402600 | -0.59261100 | 1.62057100  |
| H | -6.47645400 | -0.64661000 | 1.65153200  |
| H | -4.98861500 | -0.97546600 | 2.56581400  |
| H | -5.08750800 | 0.45753800  | 1.52576300  |
| C | -5.23256700 | -2.87749500 | 0.60609900  |
| H | -4.99470600 | -3.23491600 | 1.61202400  |
| H | -6.31167000 | -2.98131300 | 0.44897600  |
| H | -4.70633400 | -3.50954700 | -0.11155800 |
| C | -0.76474100 | 3.73376000  | -1.46580600 |
| C | -1.22686400 | 2.79494000  | -0.53182400 |
| C | -1.65744400 | 3.22844300  | 0.72537300  |
| C | -1.65038300 | 4.58537800  | 1.03592900  |
| C | -1.19105800 | 5.51270300  | 0.10501600  |
| C | -0.73221400 | 5.08298800  | -1.14358900 |
| H | -0.43716900 | 3.39330700  | -2.44662000 |
| H | -2.03408400 | 2.49028400  | 1.42382200  |
| H | -2.00683700 | 4.91821000  | 2.00577100  |
| H | -1.18774400 | 6.57097100  | 0.34720800  |
| H | -0.36867700 | 5.80508000  | -1.86803100 |
| C | -1.50956400 | 1.41016900  | -0.94394000 |
| N | -1.72680300 | 0.39782900  | -0.10538900 |
| H | -1.93096600 | 1.35082700  | -1.95663200 |

**VIIIc**

|   |             |             |             |
|---|-------------|-------------|-------------|
| C | 1.75310300  | -2.22591400 | -2.58795100 |
| C | 0.58988400  | -1.22146500 | -2.29764900 |
| C | 2.86092200  | 0.01882100  | -2.31341400 |
| C | 3.02533400  | -1.40828100 | -2.87335400 |
| H | 1.47039500  | -2.74766100 | -3.51001100 |
| H | 3.92695700  | -1.89483800 | -2.49342300 |
| H | 3.17570900  | -1.29926900 | -3.95375700 |
| C | 0.93759300  | -0.53556300 | -0.96750700 |
| C | 1.85314800  | 0.73793200  | -3.23802400 |
| H | 1.56122700  | 1.68654100  | -2.77168700 |
| H | 2.35179800  | 0.97469900  | -4.18317700 |
| C | 0.64503200  | -0.17863800 | -3.44867300 |
| H | -0.28701900 | 0.38488600  | -3.50338200 |
| H | 0.73253200  | -0.73738100 | -4.38839100 |
| N | 2.16419200  | -0.04994100 | -0.96579700 |
| C | -0.74169200 | -1.98412500 | -2.32115600 |
| H | -0.93173900 | -2.50213800 | -1.37725900 |
| H | -1.58439300 | -1.31932600 | -2.52172900 |
| H | -0.70199900 | -2.72323200 | -3.13065400 |
| C | 4.17704400  | 0.77191000  | -2.26544300 |
| H | 4.05700100  | 1.78599400  | -1.87834300 |
| H | 4.91812900  | 0.25929300  | -1.65640800 |
| H | 4.56380900  | 0.83401000  | -3.28721600 |
| H | -0.47275900 | 1.32309500  | -1.64938000 |
| C | -0.13129000 | -1.82528500 | 2.21084000  |
| C | -0.13957800 | -0.30683000 | 2.60447400  |
| B | -0.23758000 | -0.47743100 | 0.29648300  |
| O | -0.41832900 | -1.81855000 | 0.81725400  |
| O | 0.24619200  | 0.33079500  | 1.39642600  |
| C | -1.17182800 | -2.67653000 | 2.93109000  |

|   |             |             |             |
|---|-------------|-------------|-------------|
| H | -1.07254900 | -3.71796600 | 2.60829700  |
| H | -1.02413100 | -2.63842700 | 4.01699400  |
| H | -2.18050700 | -2.34308000 | 2.68335200  |
| C | 1.25282700  | -2.43615600 | 2.38780100  |
| H | 1.53436600  | -2.56125300 | 3.43919900  |
| H | 1.26410800  | -3.41836500 | 1.90286200  |
| H | 1.99229000  | -1.79128400 | 1.90462700  |
| C | -1.53198200 | 0.17709400  | 3.02488900  |
| H | -1.80887200 | -0.21162200 | 4.01132000  |
| H | -1.52418600 | 1.27131900  | 3.07218400  |
| H | -2.28993300 | -0.13939100 | 2.30380300  |
| C | 0.86876300  | 0.07626600  | 3.68436900  |
| H | 0.78029800  | 1.14667700  | 3.89974900  |
| H | 0.68283700  | -0.47545300 | 4.61335600  |
| H | 1.89328900  | -0.11315500 | 3.35287400  |
| C | 2.86739500  | 0.48129800  | 0.22031000  |
| C | 3.89458100  | -0.29518100 | 0.80577400  |
| C | 2.56254500  | 1.76868600  | 0.71193800  |
| C | 4.54266900  | 0.21286800  | 1.93664500  |
| C | 3.28403900  | 2.23702200  | 1.81103400  |
| C | 4.24977700  | 1.46714000  | 2.44006000  |
| H | 5.31783200  | -0.38683400 | 2.40533400  |
| H | 3.06552100  | 3.22654700  | 2.19604200  |
| H | 4.77678800  | 1.84899700  | 3.30895300  |
| C | 1.51282600  | 2.69935800  | 0.12107100  |
| C | 2.14873900  | 3.75232000  | -0.79797400 |
| C | 0.68943700  | 3.41048300  | 1.20208000  |
| H | 0.81623900  | 2.09959900  | -0.46540100 |
| H | 2.68324300  | 3.31248900  | -1.64561100 |
| H | 1.36855100  | 4.41129700  | -1.19489000 |

|   |             |             |             |
|---|-------------|-------------|-------------|
| H | 2.86172700  | 4.36896000  | -0.23867100 |
| H | 0.24293900  | 2.67702600  | 1.87588600  |
| H | 1.30132900  | 4.11398900  | 1.77680500  |
| H | -0.11020700 | 3.98937400  | 0.73294100  |
| C | 4.46873800  | -1.60110400 | 0.25545400  |
| C | 4.33260500  | -2.81909500 | 1.18354200  |
| C | 5.97363100  | -1.44271800 | -0.05207000 |
| H | 3.94819000  | -1.84221400 | -0.66748100 |
| H | 3.32303100  | -3.22336100 | 1.20456900  |
| H | 5.00289800  | -3.61242900 | 0.83549000  |
| H | 4.61843000  | -2.56691600 | 2.21043000  |
| H | 6.22999600  | -0.48905200 | -0.51790300 |
| H | 6.55657000  | -1.51355900 | 0.87229500  |
| H | 6.30786100  | -2.25240200 | -0.70945200 |
| C | 1.89457200  | -3.27679500 | -1.48297200 |
| H | 1.94563000  | -2.82590200 | -0.48702600 |
| H | 1.02920700  | -3.94534100 | -1.48011500 |
| H | 2.79400200  | -3.88400100 | -1.63596800 |
| C | -4.91348200 | -1.13113200 | -0.92068700 |
| C | -4.59839600 | -1.71710500 | 0.49028400  |
| B | -2.79067800 | -0.58940600 | -0.29219300 |
| O | -3.86324700 | -0.17051800 | -1.08515600 |
| O | -3.16773800 | -1.63727300 | 0.53971400  |
| C | -6.25609700 | -0.42635100 | -1.03765800 |
| H | -6.38983200 | -0.05882900 | -2.05919700 |
| H | -7.07693600 | -1.11562700 | -0.81048100 |
| H | -6.31182600 | 0.42785600  | -0.35999200 |
| C | -4.75881900 | -2.17303500 | -2.02919800 |
| H | -5.57371100 | -2.90372200 | -2.01653800 |
| H | -4.76375200 | -1.66027400 | -2.99533600 |

|   |             |             |             |
|---|-------------|-------------|-------------|
| H | -3.80754900 | -2.70576800 | -1.92589000 |
| C | -5.14513300 | -0.84096400 | 1.61839500  |
| H | -6.23558100 | -0.90337100 | 1.69005600  |
| H | -4.71284600 | -1.17631800 | 2.56612600  |
| H | -4.86384200 | 0.20679700  | 1.46457200  |
| C | -5.01779000 | -3.16464800 | 0.69414700  |
| H | -4.75472100 | -3.48193600 | 1.70760000  |
| H | -6.10043700 | -3.27696400 | 0.56853200  |
| H | -4.50802300 | -3.82492500 | -0.01018200 |
| C | -1.69059900 | 3.67799000  | -1.43852900 |
| C | -1.93663200 | 2.51580200  | -0.70135400 |
| C | -2.59205800 | 2.62348300  | 0.52107400  |
| C | -2.98542900 | 3.86994900  | 1.00578800  |
| C | -2.73148800 | 5.02369100  | 0.26981100  |
| C | -2.08260600 | 4.92431400  | -0.96108800 |
| H | -1.17793300 | 3.60136000  | -2.39722800 |
| H | -2.76633000 | 1.72507100  | 1.10317500  |
| H | -3.48773100 | 3.93893600  | 1.96652500  |
| H | -3.03490200 | 5.99433200  | 0.65017800  |
| H | -1.87913800 | 5.81800600  | -1.54418000 |
| C | -1.49336200 | 1.18034600  | -1.27335800 |
| N | -1.53306000 | 0.03951500  | -0.37997400 |
| H | -2.11465500 | 0.98881900  | -2.16158200 |

**TS5c**

|   |            |             |             |
|---|------------|-------------|-------------|
| C | 1.61607000 | -2.86595800 | -2.14549700 |
| C | 0.53110100 | -1.76524800 | -1.93724600 |
| C | 2.82788900 | -0.65030600 | -2.35167600 |
| C | 2.94686500 | -2.17699900 | -2.52298600 |
| H | 1.28026700 | -3.45455400 | -3.00922300 |

|   |             |             |             |
|---|-------------|-------------|-------------|
| H | 3.77801700  | -2.56572100 | -1.93031200 |
| H | 3.19809300  | -2.36752400 | -3.57323300 |
| C | 0.98651600  | -0.88136900 | -0.76280300 |
| C | 1.79910400  | -0.13709200 | -3.37879600 |
| H | 1.61265700  | 0.92433600  | -3.17929600 |
| H | 2.23736600  | -0.20887400 | -4.38006000 |
| C | 0.50932400  | -0.95513700 | -3.25870500 |
| H | -0.37399200 | -0.31486900 | -3.29968800 |
| H | 0.41378000  | -1.67043600 | -4.08537300 |
| N | 2.19801200  | -0.40334800 | -1.00012000 |
| C | -0.82949500 | -2.42829700 | -1.69791500 |
| H | -0.95667100 | -2.70814300 | -0.64680500 |
| H | -1.65147900 | -1.76089600 | -1.96987600 |
| H | -0.92068900 | -3.32916000 | -2.31833100 |
| C | 4.15542100  | 0.06623800  | -2.55731500 |
| H | 4.02848300  | 1.15123900  | -2.55413900 |
| H | 4.89747800  | -0.17594200 | -1.79812200 |
| H | 4.55223000  | -0.22730100 | -3.53473800 |
| H | -0.51248600 | 0.92428000  | -1.56798900 |
| C | 0.07656000  | 0.53544800  | 2.82654200  |
| C | -0.14975600 | -1.01588500 | 2.86955600  |
| B | -0.75894200 | -0.18706600 | 0.84407500  |
| O | 0.00756700  | 0.82884000  | 1.42402600  |
| O | -0.94573000 | -1.25187400 | 1.70983500  |
| C | 1.42102900  | 0.99556300  | 3.37108800  |
| H | 1.49829900  | 2.08496400  | 3.29480200  |
| H | 1.52348700  | 0.71864300  | 4.42693100  |
| H | 2.24988200  | 0.56016800  | 2.80643800  |
| C | -1.06322200 | 1.30511800  | 3.49846400  |
| H | -1.04470900 | 1.19803200  | 4.58778700  |



|   |             |             |             |
|---|-------------|-------------|-------------|
| H | -0.96521800 | 2.36633800  | 3.24773200  |
| H | -2.03287500 | 0.95234600  | 3.12881000  |
| C | 1.14514400  | -1.79892400 | 2.70486600  |
| H | 1.77001000  | -1.72260700 | 3.60034000  |
| H | 0.90381700  | -2.85322300 | 2.53481500  |
| H | 1.69936100  | -1.42481600 | 1.83798300  |
| C | -0.91102300 | -1.51237100 | 4.09189400  |
| H | -1.00283500 | -2.60129600 | 4.04412200  |
| H | -0.38121900 | -1.25130800 | 5.01500400  |
| H | -1.91758300 | -1.09090000 | 4.12475000  |
| C | 2.98445100  | 0.35838200  | -0.02438100 |
| C | 4.01113800  | -0.30721900 | 0.68864700  |
| C | 2.80841000  | 1.75292600  | 0.10758300  |
| C | 4.85383100  | 0.44692600  | 1.50925400  |
| C | 3.69570800  | 2.45329500  | 0.93112200  |
| C | 4.71388300  | 1.82014700  | 1.62438700  |
| H | 5.64022600  | -0.06124400 | 2.06038300  |
| H | 3.57979400  | 3.52744000  | 1.02883700  |
| H | 5.38758500  | 2.39177300  | 2.25530100  |
| C | 1.73201500  | 2.56839600  | -0.59694300 |
| C | 2.29447300  | 3.34609800  | -1.79582800 |
| C | 1.05114800  | 3.56657500  | 0.35070400  |
| H | 0.96539000  | 1.87773500  | -0.95034700 |
| H | 2.72755000  | 2.69910400  | -2.56309200 |
| H | 1.49365100  | 3.93214800  | -2.26039700 |
| H | 3.07515800  | 4.04205600  | -1.46738500 |
| H | 0.63848400  | 3.05389800  | 1.22038600  |
| H | 1.74850000  | 4.34432400  | 0.68037100  |
| H | 0.23304400  | 4.06913800  | -0.17249600 |
| C | 4.28601200  | -1.80699300 | 0.63768600  |

|   |             |             |             |
|---|-------------|-------------|-------------|
| C | 4.39301100  | -2.42516000 | 2.04333700  |
| C | 5.59240600  | -2.15435300 | -0.09737200 |
| H | 3.45179600  | -2.28598200 | 0.12530200  |
| H | 3.63521400  | -2.04173800 | 2.72435900  |
| H | 4.28385800  | -3.51280900 | 1.97804900  |
| H | 5.37501800  | -2.22342700 | 2.48494100  |
| H | 5.59772500  | -1.87354900 | -1.15132100 |
| H | 6.43843400  | -1.65244700 | 0.38514600  |
| H | 5.76941800  | -3.23422300 | -0.04069700 |
| C | 1.70965700  | -3.82906500 | -0.95558600 |
| H | 1.74769500  | -3.30046900 | 0.00210500  |
| H | 0.83321100  | -4.48261400 | -0.92263600 |
| H | 2.59882700  | -4.46465900 | -1.03631300 |
| C | -4.96113400 | -1.52366000 | 0.62314100  |
| C | -5.03822900 | -1.34563300 | -0.92559900 |
| B | -3.05524700 | -0.58006900 | -0.13234200 |
| O | -3.55587100 | -1.37444100 | 0.87915300  |
| O | -3.96289500 | -0.42492500 | -1.17268800 |
| C | -5.41582700 | -2.88101000 | 1.13519900  |
| H | -5.32539800 | -2.90879200 | 2.22471100  |
| H | -6.46360100 | -3.06281400 | 0.87167400  |
| H | -4.80153600 | -3.68391200 | 0.72322100  |
| C | -5.67712100 | -0.40143800 | 1.37553200  |
| H | -6.76506100 | -0.48557400 | 1.29192400  |
| H | -5.40115000 | -0.45892400 | 2.43208100  |
| H | -5.37001400 | 0.57781100  | 0.99305900  |
| C | -4.71297000 | -2.63603500 | -1.67737000 |
| H | -5.52676400 | -3.36384600 | -1.60072600 |
| H | -4.55490300 | -2.39755400 | -2.73303800 |
| H | -3.79659700 | -3.09016000 | -1.28611500 |

|   |             |             |             |
|---|-------------|-------------|-------------|
| C | -6.33631900 | -0.74242700 | -1.43825400 |
| H | -6.29806700 | -0.66094300 | -2.52833200 |
| H | -7.18839300 | -1.37720800 | -1.17142800 |
| H | -6.49664000 | 0.25641900  | -1.02778200 |
| H | -2.16007500 | 0.68164900  | -2.11994300 |
| C | -1.67757800 | 3.38869000  | -1.96778600 |
| C | -1.87492900 | 2.44246100  | -0.95738700 |
| C | -2.34134100 | 2.86879500  | 0.28259200  |
| C | -2.59795500 | 4.21973000  | 0.51376300  |
| C | -2.39403600 | 5.15743100  | -0.49391400 |
| C | -1.93392100 | 4.73665900  | -1.74214800 |
| H | -1.31475100 | 3.06015900  | -2.94100000 |
| H | -2.48207700 | 2.13666900  | 1.07100500  |
| H | -2.95401900 | 4.53967400  | 1.48893600  |
| H | -2.59210500 | 6.20926200  | -0.31158900 |
| H | -1.77502800 | 5.45989200  | -2.53683500 |
| C | -1.56013200 | 0.98884800  | -1.25431800 |
| N | -1.78494900 | 0.05519900  | -0.16804200 |

### **IXc**

|   |            |             |             |
|---|------------|-------------|-------------|
| C | 2.03657100 | -3.31647400 | -1.40753700 |
| C | 1.06857200 | -2.10400200 | -1.31229300 |
| C | 3.36335400 | -1.30737700 | -2.19832800 |
| C | 3.39463400 | -2.82652300 | -1.95564500 |
| H | 1.58899400 | -4.01831300 | -2.12504000 |
| H | 4.20775100 | -3.08007500 | -1.26696100 |
| H | 3.63694300 | -3.30891100 | -2.90947400 |
| C | 1.67820300 | -1.01838600 | -0.43095400 |
| C | 2.29633500 | -1.05866800 | -3.28053200 |
| H | 2.29983600 | -0.00442600 | -3.57320600 |

|   |             |             |             |
|---|-------------|-------------|-------------|
| H | 2.57593300  | -1.63695200 | -4.16811200 |
| C | 0.92389000  | -1.49213400 | -2.73136200 |
| H | 0.24082200  | -0.63689700 | -2.67026500 |
| H | 0.44451100  | -2.23051600 | -3.38515000 |
| N | 2.84276500  | -0.66227300 | -0.94085600 |
| C | -0.30373600 | -2.52626100 | -0.79371300 |
| H | -0.27280300 | -2.75816600 | 0.27533400  |
| H | -1.02724800 | -1.71589100 | -0.92627600 |
| H | -0.67303000 | -3.40680500 | -1.33553000 |
| C | 4.73276800  | -0.78678400 | -2.60212500 |
| H | 4.72460300  | 0.29256300  | -2.77589000 |
| H | 5.48461800  | -1.00088500 | -1.83520300 |
| H | 5.03903900  | -1.28348400 | -3.52851500 |
| H | -0.79254000 | 1.16461200  | -0.96416400 |
| C | 0.11864600  | 1.42817400  | 2.71521600  |
| C | -0.46298100 | 0.12581700  | 3.36638200  |
| B | -1.46985800 | 0.49197100  | 1.38834700  |
| O | -0.39758500 | 1.35829100  | 1.37332700  |
| O | -1.66991700 | -0.09673400 | 2.61207200  |
| C | 1.63779100  | 1.47425800  | 2.64130400  |
| H | 1.96275100  | 2.43114600  | 2.21915400  |
| H | 2.08123500  | 1.37168600  | 3.63853600  |
| H | 2.00806900  | 0.67835000  | 1.98974300  |
| C | -0.44029400 | 2.70596500  | 3.33737500  |
| H | -0.05410400 | 2.86432500  | 4.34902400  |
| H | -0.14368300 | 3.55682900  | 2.71624700  |
| H | -1.53391100 | 2.67371300  | 3.37785200  |
| C | 0.42980700  | -1.09171400 | 3.13528300  |
| H | 1.34114900  | -1.04018000 | 3.74029200  |
| H | -0.12833300 | -1.98894400 | 3.41905700  |

|   |             |             |             |
|---|-------------|-------------|-------------|
| H | 0.70908300  | -1.16550600 | 2.07659200  |
| C | -0.82172800 | 0.25617000  | 4.83800800  |
| H | -1.21797100 | -0.69646900 | 5.20031500  |
| H | 0.06602700  | 0.50674300  | 5.42896400  |
| H | -1.58143400 | 1.02421100  | 4.99677200  |
| C | 3.56556000  | 0.44606700  | -0.34233800 |
| C | 4.57523700  | 0.17334000  | 0.59668000  |
| C | 3.23165300  | 1.76256300  | -0.69954200 |
| C | 5.25383900  | 1.24712400  | 1.17293100  |
| C | 3.95628700  | 2.80462100  | -0.11225500 |
| C | 4.95717900  | 2.55657500  | 0.81503100  |
| H | 6.02780600  | 1.05641200  | 1.90999100  |
| H | 3.72028200  | 3.82987100  | -0.38378100 |
| H | 5.50243900  | 3.38139300  | 1.26366000  |
| C | 2.12410800  | 2.11319400  | -1.67915500 |
| C | 2.69664800  | 2.68365300  | -2.98320200 |
| C | 1.12592800  | 3.10007800  | -1.06219300 |
| H | 1.56979200  | 1.19839400  | -1.90761800 |
| H | 3.40400500  | 1.99757000  | -3.46007600 |
| H | 1.89053500  | 2.89300000  | -3.69433100 |
| H | 3.22662800  | 3.62326200  | -2.79069100 |
| H | 0.73129200  | 2.70900400  | -0.12013000 |
| H | 1.59146700  | 4.07407700  | -0.87424500 |
| H | 0.28578400  | 3.26579200  | -1.74629800 |
| C | 4.87318000  | -1.24344200 | 1.05275300  |
| C | 4.02079300  | -1.57410600 | 2.28333300  |
| C | 6.35768400  | -1.49779200 | 1.32452900  |
| H | 4.56507200  | -1.92342000 | 0.25486000  |
| H | 2.95776000  | -1.47214500 | 2.04500100  |
| H | 4.20987400  | -2.59782000 | 2.62575800  |

|   |             |             |             |
|---|-------------|-------------|-------------|
| H | 4.25330400  | -0.88578300 | 3.10479600  |
| H | 6.98151400  | -1.18656800 | 0.48022800  |
| H | 6.70396800  | -0.96463500 | 2.21591900  |
| H | 6.52486400  | -2.56471200 | 1.50190900  |
| C | 2.20579800  | -4.04578100 | -0.07313800 |
| H | 2.57750700  | -3.36252700 | 0.69944000  |
| H | 1.26258100  | -4.47116900 | 0.27990600  |
| H | 2.92621100  | -4.86458600 | -0.17506700 |
| C | -5.15439800 | -1.87360200 | 0.72877900  |
| C | -4.88137700 | -2.00772400 | -0.80354700 |
| B | -3.36714700 | -0.62877600 | 0.15264400  |
| O | -3.92108900 | -1.30966600 | 1.21065600  |
| O | -3.99946300 | -0.89664200 | -1.04946500 |
| C | -5.41136800 | -3.18736600 | 1.44910400  |
| H | -5.59257700 | -2.99207900 | 2.50958800  |
| H | -6.29371700 | -3.68771500 | 1.03516200  |
| H | -4.55318400 | -3.85718300 | 1.36851500  |
| C | -6.26219800 | -0.86746100 | 1.03871200  |
| H | -7.24815200 | -1.25706100 | 0.76699900  |
| H | -6.25157700 | -0.65536100 | 2.11093700  |
| H | -6.09464300 | 0.07194800  | 0.50199600  |
| C | -4.10795000 | -3.27952900 | -1.14947500 |
| H | -4.73753500 | -4.17047600 | -1.06312300 |
| H | -3.74719100 | -3.20308000 | -2.17916200 |
| H | -3.24129700 | -3.39570100 | -0.49032700 |
| C | -6.10953100 | -1.86994600 | -1.68844700 |
| H | -5.82051800 | -1.98286100 | -2.73741300 |
| H | -6.84521700 | -2.64583800 | -1.45038100 |
| H | -6.57597400 | -0.89046200 | -1.56583800 |
| H | -2.02072100 | 0.25768500  | -1.86471900 |

|   |             |            |             |
|---|-------------|------------|-------------|
| C | -3.68919800 | 2.23683600 | -2.19304000 |
| C | -2.66182300 | 2.20438400 | -1.25015400 |
| C | -2.40874700 | 3.34512400 | -0.48147500 |
| C | -3.16132100 | 4.50029200 | -0.66515200 |
| C | -4.17986200 | 4.52816000 | -1.61701200 |
| C | -4.44436600 | 3.39364300 | -2.37825400 |
| H | -3.90375900 | 1.34150800 | -2.77092000 |
| H | -1.61841600 | 3.31175100 | 0.26517000  |
| H | -2.95408800 | 5.38193700 | -0.06569100 |
| H | -4.76629800 | 5.43065500 | -1.76120900 |
| H | -5.24113400 | 3.40714100 | -3.11621400 |
| C | -1.86292200 | 0.93973400 | -1.02270700 |
| N | -2.25240900 | 0.25453900 | 0.21865000  |

## It

|   |             |            |             |
|---|-------------|------------|-------------|
| C | -2.28759500 | 2.66605100 | 0.56038200  |
| C | -1.20900400 | 2.38116500 | -0.54030600 |
| C | -2.75075700 | 0.31472300 | -0.21668500 |
| C | -3.03795000 | 1.35396900 | 0.88140300  |
| H | -2.98987900 | 3.37212600 | 0.09463400  |
| H | -2.71459400 | 0.95432300 | 1.84903200  |
| H | -4.11896600 | 1.52082700 | 0.94193800  |
| C | -0.46775000 | 1.10683600 | -0.18698600 |
| C | -3.06648000 | 1.01703200 | -1.55718400 |
| H | -3.18419400 | 0.29810000 | -2.37173400 |
| H | -4.04233500 | 1.49929800 | -1.43000800 |
| C | -1.97766800 | 2.05273800 | -1.84776400 |
| H | -1.26354500 | 1.67929000 | -2.59095700 |
| H | -2.40443900 | 2.97927300 | -2.24579200 |
| N | -1.26514000 | 0.06822200 | -0.11327100 |

|   |             |             |             |
|---|-------------|-------------|-------------|
| C | -0.29410700 | 3.57807100  | -0.78321700 |
| H | 0.33646900  | 3.79500600  | 0.07978100  |
| H | 0.37088600  | 3.38178800  | -1.62736100 |
| H | -0.90859300 | 4.45845000  | -1.00596900 |
| C | -3.55789800 | -0.96310700 | -0.06660900 |
| H | -3.33296500 | -1.67221100 | -0.86934600 |
| H | -3.37447900 | -1.46315400 | 0.88629800  |
| H | -4.61971100 | -0.70521500 | -0.12645700 |
| C | 3.01941800  | -0.16560300 | 0.31276500  |
| C | 3.26301200  | 1.16868000  | -0.48292100 |
| B | 1.10717000  | 1.18926300  | 0.29263900  |
| O | 1.73277300  | 0.01855000  | 0.88147200  |
| O | 1.95019300  | 1.58400200  | -0.82950100 |
| C | 4.02657800  | -0.40933800 | 1.43572100  |
| H | 3.79944200  | -1.36161800 | 1.92675000  |
| H | 5.04981200  | -0.46451500 | 1.04566600  |
| H | 3.97814300  | 0.38137800  | 2.18784100  |
| C | 2.97109600  | -1.40636700 | -0.57939000 |
| H | 3.95864700  | -1.67370900 | -0.97200900 |
| H | 2.58840300  | -2.24199500 | 0.01599300  |
| H | 2.28833800  | -1.25351300 | -1.41554400 |
| C | 3.89811700  | 2.26088700  | 0.38587700  |
| H | 4.93705300  | 2.03217200  | 0.64462100  |
| H | 3.87578000  | 3.20125600  | -0.17310500 |
| H | 3.32895700  | 2.40202900  | 1.30964400  |
| C | 4.07232200  | 0.99542300  | -1.76189900 |
| H | 4.19432100  | 1.96617200  | -2.25210800 |
| H | 5.06815200  | 0.59159000  | -1.54632500 |
| H | 3.56340800  | 0.32395800  | -2.45812000 |
| C | -0.75400700 | -1.27954500 | 0.09796200  |



|   |             |             |             |
|---|-------------|-------------|-------------|
| C | -0.48586600 | -1.73277400 | 1.39804100  |
| C | -0.56526300 | -2.08161300 | -1.03908000 |
| C | -0.04836600 | -3.05181100 | 1.53584200  |
| C | -0.10745500 | -3.38544300 | -0.84656200 |
| C | 0.13962100  | -3.87159700 | 0.43127700  |
| H | 0.16237900  | -3.43672700 | 2.52907600  |
| H | 0.05125500  | -4.03030900 | -1.70467000 |
| H | 0.48697100  | -4.89157700 | 0.56549500  |
| C | -0.84557900 | -1.55212700 | -2.43823200 |
| C | -1.33811500 | -2.63540800 | -3.40167300 |
| C | 0.35764900  | -0.81282600 | -3.04066400 |
| H | -1.65104500 | -0.82217300 | -2.34820500 |
| H | -2.16627500 | -3.21103800 | -2.97544900 |
| H | -1.68098700 | -2.17424000 | -4.33302400 |
| H | -0.53770100 | -3.33464200 | -3.66427900 |
| H | 0.74109100  | -0.02138800 | -2.38474900 |
| H | 1.17537000  | -1.51638900 | -3.23348300 |
| H | 0.07333300  | -0.36308300 | -3.99899100 |
| C | -0.63666100 | -0.86509200 | 2.63930600  |
| C | 0.57776500  | -0.96616500 | 3.57040300  |
| C | -1.90832900 | -1.22599600 | 3.42098500  |
| H | -0.69909900 | 0.18037000  | 2.31787900  |
| H | 1.49219400  | -0.75775500 | 3.01428000  |
| H | 0.47682600  | -0.23382600 | 4.37816700  |
| H | 0.64489100  | -1.95553400 | 4.03628000  |
| H | -2.82155700 | -1.09481600 | 2.83348100  |
| H | -1.86941900 | -2.27219600 | 3.74477800  |
| H | -1.99225600 | -0.60017000 | 4.31580200  |
| H | 0.92292600  | 2.04866500  | 1.18337200  |
| C | -1.73990700 | 3.31195800  | 1.83025300  |

|   |             |            |            |
|---|-------------|------------|------------|
| H | -1.31860500 | 4.30091600 | 1.63276200 |
| H | -2.54496900 | 3.42938400 | 2.56347500 |
| H | -0.95395600 | 2.69480800 | 2.27829100 |

**TS1t**

|   |             |             |             |
|---|-------------|-------------|-------------|
| C | -1.57188100 | 3.11291600  | 0.33517100  |
| C | -0.70744400 | 2.45295200  | -0.78907400 |
| C | -2.65463100 | 0.88298700  | -0.08351100 |
| C | -2.57767400 | 2.07523700  | 0.88049400  |
| H | -2.13239800 | 3.91083100  | -0.17364800 |
| H | -2.27571600 | 1.72378700  | 1.87339500  |
| H | -3.57514600 | 2.51659200  | 0.98839600  |
| C | -0.24965400 | 1.05706000  | -0.38131600 |
| C | -2.93372300 | 1.48236400  | -1.48131000 |
| H | -3.27650000 | 0.71466800  | -2.18037400 |
| H | -3.76147100 | 2.19264300  | -1.37142000 |
| C | -1.66513700 | 2.18940200  | -1.98113300 |
| H | -1.14173100 | 1.57922000  | -2.72703600 |
| H | -1.90436600 | 3.14668600  | -2.45693500 |
| N | -1.29519700 | 0.25406300  | -0.10173500 |
| C | 0.42136100  | 3.37728900  | -1.22940300 |
| H | 1.17757500  | 3.49710700  | -0.45184600 |
| H | 0.92894600  | 2.97990800  | -2.11118700 |
| H | 0.00020500  | 4.36024700  | -1.47279000 |
| C | -3.73084200 | -0.11589900 | 0.30493900  |
| H | -3.75977200 | -0.96016200 | -0.39116300 |
| H | -3.57601900 | -0.51263800 | 1.31099700  |
| H | -4.70161900 | 0.38827900  | 0.27454800  |
| C | 3.04474200  | -0.75891600 | -0.08960500 |
| C | 3.50253600  | 0.72114200  | -0.28987100 |

|   |             |             |             |
|---|-------------|-------------|-------------|
| B | 1.24278500  | 0.68472700  | -0.11676400 |
| O | 1.67278000  | -0.61603800 | 0.28152000  |
| O | 2.31594000  | 1.33613900  | -0.79096700 |
| C | 3.77636600  | -1.51311400 | 1.01377500  |
| H | 3.35326800  | -2.51849000 | 1.10418500  |
| H | 4.84357100  | -1.60637400 | 0.78253900  |
| H | 3.67059100  | -1.01344000 | 1.97924500  |
| C | 3.10338900  | -1.56513200 | -1.38764900 |
| H | 4.13138500  | -1.83459700 | -1.65257700 |
| H | 2.52080300  | -2.48180100 | -1.25135000 |
| H | 2.66615700  | -0.99911000 | -2.21445700 |
| C | 3.87578100  | 1.39722000  | 1.03260700  |
| H | 4.82254800  | 1.01853800  | 1.43060400  |
| H | 3.97530100  | 2.47277000  | 0.85819700  |
| H | 3.09440000  | 1.24500000  | 1.78510400  |
| C | 4.62026600  | 0.91243900  | -1.30468100 |
| H | 4.87811900  | 1.97368200  | -1.37073500 |
| H | 5.51730000  | 0.35953500  | -1.00436800 |
| H | 4.31268800  | 0.57494800  | -2.29644800 |
| C | -1.10747800 | -1.14413700 | 0.22188400  |
| C | -0.84133300 | -1.51426800 | 1.54891900  |
| C | -1.17302000 | -2.09518600 | -0.81021600 |
| C | -0.65668000 | -2.86983800 | 1.82834900  |
| C | -0.96564200 | -3.43586300 | -0.48679500 |
| C | -0.71330400 | -3.82433500 | 0.82381000  |
| H | -0.44921100 | -3.17640900 | 2.85021000  |
| H | -1.00575200 | -4.18833900 | -1.26819500 |
| H | -0.55940000 | -4.87319500 | 1.05917500  |
| C | -1.41487200 | -1.67898600 | -2.25068700 |
| C | -2.20850800 | -2.71070200 | -3.05614400 |

|   |             |             |             |
|---|-------------|-------------|-------------|
| C | -0.08925700 | -1.35380100 | -2.94893900 |
| H | -2.00407200 | -0.75959600 | -2.23066100 |
| H | -3.12207000 | -3.01368900 | -2.53443100 |
| H | -2.48876900 | -2.28880000 | -4.02633800 |
| H | -1.61665900 | -3.61020100 | -3.25495900 |
| H | 0.45383600  | -0.56343500 | -2.42162900 |
| H | 0.55353300  | -2.24064300 | -2.97518400 |
| H | -0.26817500 | -1.02794100 | -3.97996600 |
| C | -0.70138700 | -0.50649200 | 2.67855200  |
| C | 0.66850700  | -0.61729200 | 3.35973400  |
| C | -1.82143000 | -0.65174200 | 3.71622900  |
| H | -0.75683300 | 0.49501300  | 2.24500400  |
| H | 1.46251100  | -0.55268700 | 2.61285600  |
| H | 0.78877200  | 0.19050100  | 4.08976500  |
| H | 0.76974900  | -1.56763600 | 3.89620800  |
| H | -2.81401500 | -0.50392900 | 3.27986900  |
| H | -1.80264600 | -1.64894600 | 4.16971600  |
| H | -1.69224400 | 0.08276300  | 4.51830600  |
| H | 0.75803100  | 1.38748200  | 0.94362600  |
| C | -0.77885500 | 3.76027500  | 1.46706700  |
| H | -0.16514600 | 4.59256500  | 1.11284800  |
| H | -1.46838600 | 4.15020000  | 2.22335200  |
| H | -0.11964600 | 3.03272500  | 1.95392000  |

**1at**

|   |             |            |             |
|---|-------------|------------|-------------|
| C | -2.49059600 | 2.71621900 | -0.02384600 |
| C | -1.08324700 | 2.38834900 | -0.59057500 |
| C | -2.61130300 | 0.28921800 | -0.76452600 |
| C | -3.24956900 | 1.37642000 | 0.12948300  |
| H | -3.00001700 | 3.33033700 | -0.78154100 |

|   |             |             |             |
|---|-------------|-------------|-------------|
| H | -3.23548600 | 1.04670200  | 1.17585100  |
| H | -4.30416400 | 1.49805900  | -0.14589700 |
| C | -0.53732400 | 1.17523100  | 0.21238700  |
| C | -2.45256000 | 0.94850400  | -2.15208900 |
| H | -2.28112900 | 0.19911300  | -2.93175800 |
| H | -3.38626700 | 1.46325100  | -2.41333600 |
| C | -1.27834000 | 1.94710000  | -2.05641200 |
| H | -0.34693200 | 1.48720100  | -2.40869600 |
| H | -1.46441600 | 2.82902100  | -2.68181000 |
| N | -1.25302200 | -0.01216800 | -0.26338300 |
| C | -0.12861800 | 3.57538600  | -0.50765900 |
| H | 0.17159200  | 3.77989500  | 0.52744000  |
| H | 0.77637500  | 3.37454300  | -1.09260500 |
| H | -0.59437800 | 4.48259600  | -0.91035100 |
| C | -3.48313200 | -0.95326600 | -0.79326800 |
| H | -3.02118200 | -1.75133800 | -1.37886800 |
| H | -3.65300800 | -1.33253500 | 0.22055000  |
| H | -4.45225000 | -0.71347600 | -1.24207300 |
| C | 3.07962400  | 0.47735300  | 0.97783000  |
| C | 3.19123800  | 0.86704000  | -0.52738500 |
| B | 1.03212200  | 0.97571100  | 0.15805600  |
| O | 1.77229000  | 0.98519300  | 1.31511300  |
| O | 1.80930800  | 0.79171300  | -0.95970200 |
| C | 4.11419800  | 1.11974900  | 1.88611000  |
| H | 3.95162700  | 0.78817600  | 2.91543200  |
| H | 5.12508300  | 0.82302000  | 1.58643900  |
| H | 4.04398800  | 2.20909900  | 1.86250900  |
| C | 3.02566400  | -1.03480200 | 1.19169000  |
| H | 4.00639800  | -1.49707000 | 1.04152900  |
| H | 2.69644300  | -1.23369800 | 2.21580400  |

|   |             |             |             |
|---|-------------|-------------|-------------|
| H | 2.30388300  | -1.50170200 | 0.51095800  |
| C | 3.63880900  | 2.31314800  | -0.73117200 |
| H | 4.70008800  | 2.43999000  | -0.49707600 |
| H | 3.47697400  | 2.58849900  | -1.77719600 |
| H | 3.05727000  | 2.99384900  | -0.10120100 |
| C | 4.04570100  | -0.07355200 | -1.36064900 |
| H | 4.03831300  | 0.24755000  | -2.40652700 |
| H | 5.08127200  | -0.05251300 | -1.00360600 |
| H | 3.68041100  | -1.10087500 | -1.31321400 |
| C | -0.76187600 | -1.30290800 | 0.09600900  |
| C | -0.74623800 | -1.72189900 | 1.44736100  |
| C | -0.20624900 | -2.15051800 | -0.89688400 |
| C | -0.13814900 | -2.93334700 | 1.78657200  |
| C | 0.36353800  | -3.36747600 | -0.51472500 |
| C | 0.41618000  | -3.75666800 | 0.81735600  |
| H | -0.11596200 | -3.24192900 | 2.82911400  |
| H | 0.78370600  | -4.01745500 | -1.27865200 |
| H | 0.87750000  | -4.69958600 | 1.09588200  |
| C | -0.21667100 | -1.80070700 | -2.37588600 |
| C | -1.06771900 | -2.79195100 | -3.18257200 |
| C | 1.19433100  | -1.73884200 | -2.97089100 |
| H | -0.64900700 | -0.80371200 | -2.46600800 |
| H | -2.08422800 | -2.88753300 | -2.79155200 |
| H | -1.13351200 | -2.47131700 | -4.22786800 |
| H | -0.61506900 | -3.79009200 | -3.16971100 |
| H | 1.77510700  | -0.95467900 | -2.48495400 |
| H | 1.72034300  | -2.69420600 | -2.85872900 |
| H | 1.13976900  | -1.51560700 | -4.04227900 |
| C | -1.40813900 | -0.92091900 | 2.55596800  |
| C | -0.38763200 | -0.42744800 | 3.58858100  |

|   |             |             |            |
|---|-------------|-------------|------------|
| C | -2.51760500 | -1.73245300 | 3.23728200 |
| H | -1.87960500 | -0.04972600 | 2.09867500 |
| H | 0.40026300  | 0.16468000  | 3.11430000 |
| H | -0.88073600 | 0.18638000  | 4.35045700 |
| H | 0.08402000  | -1.27504800 | 4.10029000 |
| H | -3.25307900 | -2.09165700 | 2.51059300 |
| H | -2.10950500 | -2.60537400 | 3.75805600 |
| H | -3.03752800 | -1.11607900 | 3.97836900 |
| H | -0.75116900 | 1.38362500  | 1.28015200 |
| C | -2.49728200 | 3.50576100  | 1.28354200 |
| H | -2.06127200 | 4.50196300  | 1.16390400 |
| H | -3.52527600 | 3.63177300  | 1.63977100 |
| H | -1.93967600 | 2.98291000  | 2.06976800 |

**IVt**

|   |             |             |             |
|---|-------------|-------------|-------------|
| C | -0.87215200 | -1.66068800 | -2.75809500 |
| C | 0.13052900  | -0.49549200 | -2.53152100 |
| C | 0.85689300  | -2.58093100 | -1.14970200 |
| C | -0.58896100 | -2.72786900 | -1.67614000 |
| H | -0.63908300 | -2.09054200 | -3.74369200 |
| H | -1.28860900 | -2.61882000 | -0.83512100 |
| H | -0.73589800 | -3.73670300 | -2.08103000 |
| C | 0.18213900  | -0.22129000 | -1.00109100 |
| C | 1.74577400  | -2.43303300 | -2.40502800 |
| H | 2.80039900  | -2.60355400 | -2.16398300 |
| H | 1.46557600  | -3.20420600 | -3.13456600 |
| C | 1.50985900  | -1.01874700 | -2.98036400 |
| H | 2.27887300  | -0.31488700 | -2.63964800 |
| H | 1.55193400  | -1.03392500 | -4.07648000 |
| N | 0.93641900  | -1.32041400 | -0.38556600 |

|   |             |             |             |
|---|-------------|-------------|-------------|
| C | -0.25462900 | 0.75603200  | -3.31533600 |
| H | -1.14292300 | 1.23937300  | -2.89144600 |
| H | 0.56467200  | 1.48112200  | -3.30084600 |
| H | -0.46916900 | 0.50344700  | -4.36095300 |
| C | 1.24090200  | -3.77954900 | -0.29912400 |
| H | 2.23376000  | -3.65799600 | 0.14169200  |
| H | 0.52551700  | -3.92155500 | 0.51812700  |
| H | 1.24580600  | -4.68250200 | -0.91800100 |
| C | 0.97958100  | 2.98278100  | 0.82720700  |
| C | 1.66750600  | 3.25244600  | -0.54848300 |
| B | 0.74436300  | 1.18758000  | -0.54075200 |
| O | 0.18216700  | 1.82092500  | 0.53445800  |
| O | 1.76118900  | 1.91770200  | -1.11040200 |
| C | 0.05752400  | 4.09319900  | 1.30563600  |
| H | -0.36414700 | 3.82034300  | 2.27752900  |
| H | 0.60995900  | 5.03199500  | 1.42315900  |
| H | -0.76680100 | 4.24407700  | 0.60567000  |
| C | 1.96088500  | 2.57706700  | 1.92465100  |
| H | 2.55357700  | 3.43028300  | 2.26995900  |
| H | 1.39294300  | 2.17534200  | 2.76909600  |
| H | 2.63716900  | 1.78816600  | 1.57803100  |
| C | 0.78301900  | 4.05890300  | -1.49846100 |
| H | 0.70149400  | 5.10200200  | -1.17765200 |
| H | 1.22816800  | 4.03686600  | -2.49753200 |
| H | -0.22221700 | 3.62746200  | -1.55535500 |
| C | 3.05387600  | 3.86718700  | -0.45996700 |
| H | 3.47870300  | 3.95889500  | -1.46365500 |
| H | 2.99250300  | 4.86885500  | -0.02059900 |
| H | 3.73052400  | 3.26348000  | 0.14741500  |
| C | 1.48571200  | -1.19077100 | 0.92407500  |



|   |             |             |             |
|---|-------------|-------------|-------------|
| C | 0.64574600  | -1.16616500 | 2.06213000  |
| C | 2.88457000  | -1.04203300 | 1.09821600  |
| C | 1.20755200  | -1.00057100 | 3.32987100  |
| C | 3.40580600  | -0.90461300 | 2.38749500  |
| C | 2.57930400  | -0.87809300 | 3.50134600  |
| H | 0.55660400  | -0.98253300 | 4.20075500  |
| H | 4.48099800  | -0.80338900 | 2.51573200  |
| H | 3.00030200  | -0.76285400 | 4.49580900  |
| C | 3.85758600  | -1.01311900 | -0.06805600 |
| C | 4.83236800  | -2.19663400 | -0.02870600 |
| C | 4.63211300  | 0.30833500  | -0.13041600 |
| H | 3.26626000  | -1.07784200 | -0.97982100 |
| H | 4.31028100  | -3.15788500 | -0.00752000 |
| H | 5.48240000  | -2.18288700 | -0.91034700 |
| H | 5.47373900  | -2.14718400 | 0.85860400  |
| H | 3.94339500  | 1.14061000  | -0.29203800 |
| H | 5.20057500  | 0.48951000  | 0.78910900  |
| H | 5.34238500  | 0.29051900  | -0.96442000 |
| C | -0.86156600 | -1.33977900 | 1.97055300  |
| C | -1.59988200 | -0.10635900 | 2.50871400  |
| C | -1.32525000 | -2.60228300 | 2.70876500  |
| H | -1.11094700 | -1.46659600 | 0.91331100  |
| H | -1.36674500 | 0.77990500  | 1.91200300  |
| H | -2.68299000 | -0.26992400 | 2.50385400  |
| H | -1.30717400 | 0.09359000  | 3.54586500  |
| H | -0.80441100 | -3.49520600 | 2.34998700  |
| H | -1.14292300 | -2.51899100 | 3.78574300  |
| H | -2.40240100 | -2.75000600 | 2.56649900  |
| H | -0.87212000 | -0.20718900 | -0.64601100 |
| C | -4.20192200 | -0.60284300 | 0.33757300  |

|   |             |             |             |
|---|-------------|-------------|-------------|
| C | -4.44163200 | 0.73692300  | 0.01224100  |
| C | -5.72233800 | 1.28251200  | 0.15057300  |
| C | -6.75999400 | 0.48440100  | 0.61698200  |
| C | -6.52367300 | -0.84971900 | 0.94242400  |
| C | -5.24733100 | -1.39141500 | 0.80274600  |
| H | -3.20126700 | -1.01132700 | 0.23117900  |
| H | -5.89198200 | 2.32251300  | -0.10698100 |
| H | -7.75433100 | 0.90447400  | 0.72616800  |
| H | -7.33699700 | -1.46953300 | 1.30636000  |
| H | -5.06343000 | -2.43028000 | 1.05657600  |
| C | -3.36996800 | 1.56651200  | -0.47665200 |
| N | -2.52494100 | 2.24539800  | -0.88416100 |
| C | -2.34070500 | -1.24648300 | -2.77998200 |
| H | -2.58133600 | -0.64867900 | -3.66369800 |
| H | -2.99044300 | -2.12888000 | -2.78124800 |
| H | -2.59460900 | -0.64567200 | -1.90062000 |

### **TS2t**

|   |             |             |             |
|---|-------------|-------------|-------------|
| C | -1.18645500 | -2.23653800 | -2.34487300 |
| C | -0.35629400 | -0.91494500 | -2.35297300 |
| C | 0.77782100  | -2.70337900 | -0.85797400 |
| C | -0.68857800 | -3.08163100 | -1.15971900 |
| H | -0.91531600 | -2.75816800 | -3.27354400 |
| H | -1.30008000 | -2.90098100 | -0.26442300 |
| H | -0.75604100 | -4.15192800 | -1.38789500 |
| C | -0.09867100 | -0.42367800 | -0.89283300 |
| C | 1.47119700  | -2.63597000 | -2.24113700 |
| H | 2.55640200  | -2.74088800 | -2.17447900 |
| H | 1.12652600  | -3.49567900 | -2.82761900 |
| C | 1.04195700  | -1.31629400 | -2.89954100 |

|   |             |             |             |
|---|-------------|-------------|-------------|
| H | 1.75197500  | -0.50830600 | -2.68661000 |
| H | 0.98248200  | -1.42526100 | -3.98817500 |
| N | 0.74034100  | -1.33011700 | -0.26142000 |
| C | -0.97708300 | 0.13110400  | -3.27626100 |
| H | -1.97737500 | 0.43357800  | -2.96054000 |
| H | -0.35095900 | 1.02558100  | -3.32336100 |
| H | -1.06141900 | -0.29519500 | -4.28336900 |
| C | 1.42904900  | -3.71193700 | 0.07226400  |
| H | 2.46625600  | -3.44949900 | 0.29666900  |
| H | 0.88548900  | -3.78818300 | 1.01934500  |
| H | 1.42148100  | -4.69248500 | -0.41377400 |
| C | 1.07438100  | 2.95554700  | 0.57773000  |
| C | 1.22282000  | 3.22215800  | -0.98519600 |
| B | 0.12320400  | 1.24670000  | -0.64583500 |
| O | 0.49051400  | 1.65600400  | 0.66007800  |
| O | 0.93747900  | 1.94496800  | -1.57596900 |
| C | 0.14425800  | 3.94257300  | 1.28444800  |
| H | 0.05937700  | 3.65275900  | 2.33629600  |
| H | 0.53476800  | 4.96519800  | 1.24059800  |
| H | -0.85605700 | 3.92478600  | 0.84536900  |
| C | 2.39806500  | 2.89060900  | 1.33629800  |
| H | 2.90999100  | 3.85880500  | 1.34801300  |
| H | 2.18966900  | 2.58738300  | 2.36702600  |
| H | 3.05943500  | 2.13782100  | 0.90468000  |
| C | 0.21180300  | 4.23034900  | -1.54766900 |
| H | 0.36815000  | 5.22976700  | -1.12949400 |
| H | 0.35309100  | 4.28663300  | -2.63147300 |
| H | -0.81614400 | 3.92088900  | -1.35666000 |
| C | 2.61423900  | 3.67789200  | -1.41808200 |
| H | 2.65504300  | 3.69851300  | -2.51118700 |

|   |             |             |             |
|---|-------------|-------------|-------------|
| H | 2.81253100  | 4.69030800  | -1.04941500 |
| H | 3.40733300  | 3.02288800  | -1.05808600 |
| C | 1.42702400  | -1.03624000 | 0.97993200  |
| C | 0.71533900  | -0.95403800 | 2.18929700  |
| C | 2.82485400  | -0.83823800 | 0.96923700  |
| C | 1.40509200  | -0.63333500 | 3.36075500  |
| C | 3.47125500  | -0.51403100 | 2.16188700  |
| C | 2.77150700  | -0.40282500 | 3.35526200  |
| H | 0.85366700  | -0.56274900 | 4.29464900  |
| H | 4.54422900  | -0.34226000 | 2.15131400  |
| H | 3.29004900  | -0.14792900 | 4.27466000  |
| C | 3.66047900  | -0.96431200 | -0.29143800 |
| C | 4.91216400  | -1.82549900 | -0.08871900 |
| C | 4.02559800  | 0.40003300  | -0.87757900 |
| H | 3.04254600  | -1.45253200 | -1.03561500 |
| H | 4.67606700  | -2.78671800 | 0.37949200  |
| H | 5.39026800  | -2.02170200 | -1.05430200 |
| H | 5.65126900  | -1.32068900 | 0.54211500  |
| H | 3.11766600  | 0.96134200  | -1.11597700 |
| H | 4.63178100  | 0.98334900  | -0.17323300 |
| H | 4.60679100  | 0.27550600  | -1.79869800 |
| C | -0.78081200 | -1.18546400 | 2.29007000  |
| C | -1.48848400 | 0.06555700  | 2.82773900  |
| C | -1.10959300 | -2.40802600 | 3.15540500  |
| H | -1.15257600 | -1.38880100 | 1.28380800  |
| H | -1.24523200 | 0.93884200  | 2.21489500  |
| H | -2.57379400 | -0.07830900 | 2.84686600  |
| H | -1.16675300 | 0.27466300  | 3.85410800  |
| H | -0.63219800 | -3.31530800 | 2.77128000  |
| H | -0.77174300 | -2.26360500 | 4.18723400  |

|   |             |             |             |
|---|-------------|-------------|-------------|
| H | -2.19292700 | -2.57414800 | 3.18094400  |
| H | -1.31952700 | -0.39128000 | -0.38371600 |
| C | -3.95526000 | -0.72108500 | 0.62625200  |
| C | -3.59822000 | 0.50982200  | 0.07329500  |
| C | -4.55069300 | 1.52977200  | -0.04179500 |
| C | -5.85219400 | 1.30935500  | 0.39150700  |
| C | -6.20710800 | 0.08030700  | 0.94496700  |
| C | -5.25797300 | -0.93247200 | 1.06345600  |
| H | -3.20892200 | -1.50588900 | 0.71390500  |
| H | -4.25171000 | 2.48221000  | -0.46705100 |
| H | -6.59028600 | 2.09966800  | 0.29972200  |
| H | -7.22411900 | -0.08767500 | 1.28502000  |
| H | -5.53120800 | -1.88911800 | 1.49663800  |
| C | -2.23873400 | 0.81451400  | -0.37223000 |
| N | -1.52529200 | 1.70924500  | -0.72958200 |
| C | -2.70304800 | -2.08995500 | -2.37064400 |
| H | -3.04770600 | -1.66777200 | -3.31855700 |
| H | -3.17455300 | -3.07203400 | -2.25192400 |
| H | -3.07121000 | -1.44879600 | -1.56898200 |

### Vt

|   |             |             |             |
|---|-------------|-------------|-------------|
| C | -0.46964400 | -3.03884100 | -1.28535900 |
| C | 0.11812400  | -1.74820100 | -1.95291900 |
| C | 1.72187800  | -2.63925100 | -0.11287700 |
| C | 0.36845500  | -3.37022400 | -0.03399100 |
| H | -0.31908000 | -3.83224100 | -2.03168700 |
| H | -0.16031100 | -3.05348600 | 0.87222500  |
| H | 0.54780400  | -4.44774200 | 0.04949100  |
| C | 0.44206000  | -0.72825700 | -0.86916400 |
| C | 2.28828200  | -2.95693300 | -1.51393200 |

|   |             |             |             |
|---|-------------|-------------|-------------|
| H | 3.36440000  | -2.77721100 | -1.57265800 |
| H | 2.14998800  | -4.03344900 | -1.66525900 |
| C | 1.49913100  | -2.15432400 | -2.54565000 |
| H | 2.03635600  | -1.24515400 | -2.84021500 |
| H | 1.32626500  | -2.73778600 | -3.45550200 |
| N | 1.34476400  | -1.17248500 | -0.02925700 |
| C | -0.74931400 | -1.22433300 | -3.09568800 |
| H | -1.71022500 | -0.86027800 | -2.73849400 |
| H | -0.24619600 | -0.39295900 | -3.59638600 |
| H | -0.90076900 | -2.03565200 | -3.81803200 |
| C | 2.69017800  | -3.05422400 | 0.98176700  |
| H | 3.64767100  | -2.53249800 | 0.89183800  |
| H | 2.29550700  | -2.86797900 | 1.98271400  |
| H | 2.87620900  | -4.12736200 | 0.87522100  |
| C | 0.15077100  | 2.93272600  | -0.07217200 |
| C | -0.11375000 | 2.88913800  | -1.63205900 |
| B | -0.37792400 | 0.74995600  | -0.78235100 |
| O | -0.07432500 | 1.59704900  | 0.35682400  |
| O | 0.01201300  | 1.51190000  | -1.96087700 |
| C | -0.79549300 | 3.86771900  | 0.68334200  |
| H | -0.56823100 | 3.82151200  | 1.75373000  |
| H | -0.66982900 | 4.90611600  | 0.35556400  |
| H | -1.84129800 | 3.58471200  | 0.54314600  |
| C | 1.58511900  | 3.29938800  | 0.30964500  |
| H | 1.82264400  | 4.34297300  | 0.07610900  |
| H | 1.70359500  | 3.14223500  | 1.38701500  |
| H | 2.30072600  | 2.65141000  | -0.19549500 |
| C | -1.52377000 | 3.35023100  | -2.02588400 |
| H | -1.67188000 | 4.41971200  | -1.84275200 |
| H | -1.65781300 | 3.15829600  | -3.09448600 |

|   |             |             |             |
|---|-------------|-------------|-------------|
| H | -2.29311100 | 2.78943700  | -1.49075800 |
| C | 0.90044400  | 3.67929600  | -2.45407600 |
| H | 0.67093300  | 3.56252400  | -3.51747100 |
| H | 0.85744700  | 4.74656700  | -2.20890800 |
| H | 1.91930800  | 3.32354000  | -2.28467800 |
| C | 1.95560800  | -0.34511100 | 1.00649900  |
| C | 1.29650800  | -0.13473900 | 2.22532200  |
| C | 3.23774500  | 0.16736500  | 0.74301200  |
| C | 1.97867300  | 0.59069700  | 3.20520100  |
| C | 3.86512800  | 0.90239100  | 1.74894000  |
| C | 3.24677900  | 1.10535100  | 2.97583500  |
| H | 1.49665700  | 0.76553600  | 4.16224900  |
| H | 4.85342400  | 1.31404300  | 1.57325200  |
| H | 3.75286100  | 1.67058100  | 3.75252500  |
| C | 3.93215000  | -0.06532500 | -0.59122800 |
| C | 5.45690500  | -0.13685200 | -0.47241900 |
| C | 3.52896400  | 0.96224200  | -1.65733800 |
| H | 3.60155900  | -1.03653600 | -0.95643700 |
| H | 5.77124900  | -0.82896600 | 0.31574400  |
| H | 5.88507400  | -0.47603400 | -1.42070100 |
| H | 5.89101200  | 0.84467800  | -0.25625000 |
| H | 2.44120400  | 1.03900900  | -1.77646100 |
| H | 3.91427900  | 1.95434700  | -1.39517300 |
| H | 3.96445400  | 0.68261100  | -2.62359200 |
| C | -0.10815300 | -0.63521900 | 2.52353700  |
| C | -0.96384700 | 0.45169500  | 3.18713100  |
| C | -0.08399300 | -1.87901900 | 3.42375600  |
| H | -0.59353900 | -0.89121400 | 1.57486300  |
| H | -0.87458900 | 1.39033700  | 2.63621700  |
| H | -2.01356700 | 0.13855300  | 3.19321900  |

|   |             |             |             |
|---|-------------|-------------|-------------|
| H | -0.66572000 | 0.61346300  | 4.22897900  |
| H | 0.44826500  | -2.72046400 | 2.97125700  |
| H | 0.40794000  | -1.64768300 | 4.37530900  |
| H | -1.10573100 | -2.20673200 | 3.64237600  |
| H | -2.30287000 | 1.29493600  | 0.96504600  |
| C | -4.79383200 | 0.52053200  | 1.38827900  |
| C | -4.04203100 | 0.17072600  | 0.26456900  |
| C | -4.63607800 | -0.59849400 | -0.74166700 |
| C | -5.95421200 | -1.01741900 | -0.61745700 |
| C | -6.69602400 | -0.67171200 | 0.51365100  |
| C | -6.11500100 | 0.09963700  | 1.51639200  |
| H | -4.33401700 | 1.12943100  | 2.16428000  |
| H | -4.04088500 | -0.84501800 | -1.61598900 |
| H | -6.41135900 | -1.61133600 | -1.40348200 |
| H | -7.72685500 | -0.99976800 | 0.60867100  |
| H | -6.69098900 | 0.37485600  | 2.39479300  |
| C | -2.62876400 | 0.61460700  | 0.16102800  |
| N | -1.85060000 | 0.24948900  | -0.76836700 |
| C | -1.95723600 | -2.98530500 | -0.95301100 |
| H | -2.56336700 | -2.83697300 | -1.85050900 |
| H | -2.26459900 | -3.92974100 | -0.49028100 |
| H | -2.18158700 | -2.16730900 | -0.26272300 |

**TS3t**

|   |             |             |             |
|---|-------------|-------------|-------------|
| C | -0.53051000 | -2.79285900 | -1.70014700 |
| C | 0.19601100  | -1.48710000 | -2.16153900 |
| C | 1.63959700  | -2.76789800 | -0.42991200 |
| C | 0.23390800  | -3.38824300 | -0.50150500 |
| H | -0.45183400 | -3.48791000 | -2.54946200 |
| H | -0.30032500 | -3.17689000 | 0.43146600  |



|   |             |             |             |
|---|-------------|-------------|-------------|
| H | 0.32222200  | -4.47746600 | -0.58806100 |
| C | 0.57649200  | -0.61868400 | -0.96314300 |
| C | 2.24024500  | -2.92943500 | -1.84430700 |
| H | 3.32654200  | -2.80696300 | -1.84690800 |
| H | 2.04932100  | -3.96482100 | -2.14991800 |
| C | 1.54313500  | -1.94327700 | -2.78710300 |
| H | 2.16911400  | -1.06117900 | -2.96484700 |
| H | 1.34603300  | -2.39920300 | -3.76390200 |
| N | 1.38188900  | -1.30129900 | -0.17004300 |
| C | -0.60337000 | -0.71033300 | -3.20206100 |
| H | -1.52088800 | -0.30410400 | -2.77416600 |
| H | -0.01377800 | 0.13409600  | -3.57209500 |
| H | -0.85370500 | -1.36177100 | -4.04933200 |
| C | 2.50428500  | -3.42191300 | 0.63583800  |
| H | 3.50895600  | -2.99070200 | 0.67408900  |
| H | 2.06288300  | -3.33547900 | 1.63192300  |
| H | 2.60190300  | -4.48517400 | 0.39387900  |
| C | 0.38973100  | 3.26106100  | 0.15134300  |
| C | 0.08934000  | 3.45768100  | -1.37805500 |
| B | -0.85520700 | 1.52272900  | -0.65829500 |
| O | -0.49607000 | 2.19020100  | 0.50499000  |
| O | -0.39351100 | 2.17171200  | -1.79140800 |
| C | 0.06502500  | 4.46788500  | 1.02122500  |
| H | 0.29041500  | 4.23086800  | 2.06516300  |
| H | 0.67348600  | 5.33035500  | 0.72742200  |
| H | -0.98986100 | 4.74176600  | 0.95282400  |
| C | 1.80385200  | 2.77658000  | 0.43298000  |
| H | 2.55588600  | 3.53997100  | 0.20623200  |
| H | 1.88108600  | 2.50287500  | 1.48977800  |
| H | 2.00309500  | 1.88217300  | -0.15628200 |

|   |             |             |             |
|---|-------------|-------------|-------------|
| C | -1.04336200 | 4.45329300  | -1.63514400 |
| H | -0.74989900 | 5.47955500  | -1.39314700 |
| H | -1.31653100 | 4.40529000  | -2.69261500 |
| H | -1.92833200 | 4.19190100  | -1.04574800 |
| C | 1.30635300  | 3.82136800  | -2.21600000 |
| H | 1.01025600  | 3.91909100  | -3.26440700 |
| H | 1.73263000  | 4.77586800  | -1.88776000 |
| H | 2.07628900  | 3.04935200  | -2.14756300 |
| C | 1.93951100  | -0.65998100 | 1.00783800  |
| C | 1.13307800  | -0.44848100 | 2.13813200  |
| C | 3.28682800  | -0.25018700 | 0.97015500  |
| C | 1.71974600  | 0.16974900  | 3.24823800  |
| C | 3.81952900  | 0.37021800  | 2.09935100  |
| C | 3.04572700  | 0.57444200  | 3.23605300  |
| H | 1.11962000  | 0.33558600  | 4.13769700  |
| H | 4.85443000  | 0.69616300  | 2.09390100  |
| H | 3.47789400  | 1.05282600  | 4.10984600  |
| C | 4.14565000  | -0.44636400 | -0.27186300 |
| C | 5.63354400  | -0.62080100 | 0.04450200  |
| C | 3.95192400  | 0.67697600  | -1.29926300 |
| H | 3.81447000  | -1.36708100 | -0.75138500 |
| H | 5.79595200  | -1.37182400 | 0.82446500  |
| H | 6.16775200  | -0.93789800 | -0.85633900 |
| H | 6.08930700  | 0.31806900  | 0.37595600  |
| H | 2.90732400  | 0.74669200  | -1.62040900 |
| H | 4.24674200  | 1.64375100  | -0.87567800 |
| H | 4.57197500  | 0.48603000  | -2.18228600 |
| C | -0.31757900 | -0.89742000 | 2.23050700  |
| C | -1.21197900 | 0.14372700  | 2.91399900  |
| C | -0.42524600 | -2.22721800 | 2.99145700  |

|   |             |             |             |
|---|-------------|-------------|-------------|
| H | -0.69822400 | -1.03391900 | 1.21283900  |
| H | -1.06205100 | 1.13326000  | 2.47657800  |
| H | -2.26209200 | -0.14538200 | 2.79131800  |
| H | -1.01632500 | 0.19469500  | 3.99110100  |
| H | 0.16872000  | -3.02318800 | 2.53425500  |
| H | -0.07226200 | -2.10068100 | 4.02147300  |
| H | -1.46797700 | -2.56066100 | 3.02798200  |
| H | -2.80111100 | 1.69535900  | 0.96010100  |
| C | -5.00098900 | 0.30049300  | 1.43928300  |
| C | -4.22296700 | 0.18485900  | 0.28489600  |
| C | -4.67923300 | -0.60378200 | -0.77617100 |
| C | -5.88537100 | -1.28421100 | -0.67119100 |
| C | -6.64782400 | -1.18133000 | 0.49347800  |
| C | -6.20650800 | -0.38686100 | 1.54855100  |
| H | -4.65162700 | 0.93007300  | 2.25502800  |
| H | -4.07420500 | -0.65501900 | -1.67575800 |
| H | -6.23889900 | -1.89199400 | -1.49859200 |
| H | -7.59055500 | -1.71421300 | 0.57347400  |
| H | -6.80251900 | -0.29964900 | 2.45170800  |
| C | -2.93623300 | 0.91006500  | 0.19877900  |
| N | -2.04817900 | 0.65761400  | -0.67544100 |
| C | -2.00925400 | -2.62218100 | -1.37207600 |
| H | -2.15580000 | -1.85231700 | -0.60792500 |
| H | -2.58214000 | -2.32594200 | -2.25513900 |
| H | -2.42513100 | -3.56640000 | -1.00230600 |

## VIt

|   |             |             |             |
|---|-------------|-------------|-------------|
| C | -0.43636400 | -2.57050600 | -1.96370600 |
| C | 0.35978300  | -1.26851000 | -2.29453000 |
| C | 1.72758200  | -2.77852400 | -0.69384700 |

|   |             |             |             |
|---|-------------|-------------|-------------|
| C | 0.30908700  | -3.34939700 | -0.85768400 |
| H | -0.42618500 | -3.17230200 | -2.88456400 |
| H | -0.22273100 | -3.26804200 | 0.09732200  |
| H | 0.37574100  | -4.41651600 | -1.09986200 |
| C | 0.76325500  | -0.54237400 | -1.01725400 |
| C | 2.36057600  | -2.79076000 | -2.10243000 |
| H | 3.44583900  | -2.66254000 | -2.05533300 |
| H | 2.18604200  | -3.78928900 | -2.52028100 |
| C | 1.68880500  | -1.70968700 | -2.96062100 |
| H | 2.33926900  | -0.83246000 | -3.06181900 |
| H | 1.48289600  | -2.07480600 | -3.97344700 |
| N | 1.51027700  | -1.34559900 | -0.28237900 |
| C | -0.41237700 | -0.33503900 | -3.21957300 |
| H | -1.29570200 | 0.07004600  | -2.71928600 |
| H | 0.21687400  | 0.51648600  | -3.49829000 |
| H | -0.72032300 | -0.85844400 | -4.13435000 |
| C | 2.55568400  | -3.56293000 | 0.30987900  |
| H | 3.56063000  | -3.14418200 | 0.42395900  |
| H | 2.08490000  | -3.58451200 | 1.29672800  |
| H | 2.65505400  | -4.59307200 | -0.04739200 |
| C | 0.21000900  | 3.44611500  | 0.39629200  |
| C | 0.05474100  | 3.73090100  | -1.13969400 |
| B | -1.30696700 | 2.03512400  | -0.52770700 |
| O | -0.93761200 | 2.61526000  | 0.66682800  |
| O | -0.67932700 | 2.58586700  | -1.61025700 |
| C | 0.14186400  | 4.68114700  | 1.28130700  |
| H | 0.24252600  | 4.38167600  | 2.32827900  |
| H | 0.96119000  | 5.36796000  | 1.04240800  |
| H | -0.80633500 | 5.21026200  | 1.16562500  |
| C | 1.44239300  | 2.61150100  | 0.72770400  |

|   |             |             |             |
|---|-------------|-------------|-------------|
| H | 2.36686800  | 3.17452700  | 0.56182500  |
| H | 1.40115200  | 2.31247900  | 1.78081200  |
| H | 1.44541000  | 1.70172100  | 0.11955100  |
| C | -0.81053800 | 4.95605900  | -1.43298200 |
| H | -0.30142500 | 5.88521400  | -1.15930200 |
| H | -1.03330500 | 4.97981500  | -2.50299600 |
| H | -1.75871800 | 4.90186900  | -0.88879900 |
| C | 1.36767100  | 3.81375300  | -1.90163700 |
| H | 1.16424800  | 4.00746100  | -2.95877600 |
| H | 1.98966700  | 4.62843800  | -1.51465100 |
| H | 1.92132700  | 2.87594600  | -1.82339000 |
| C | 2.02538400  | -0.85307500 | 0.98117500  |
| C | 1.18002700  | -0.79020900 | 2.09952600  |
| C | 3.35820200  | -0.40545000 | 1.03621400  |
| C | 1.71668700  | -0.30727700 | 3.29800300  |
| C | 3.84004700  | 0.08978700  | 2.24730500  |
| C | 3.03047800  | 0.12862000  | 3.37726800  |
| H | 1.08475400  | -0.26477100 | 4.18055000  |
| H | 4.86336600  | 0.44514100  | 2.31231400  |
| H | 3.42447300  | 0.50575400  | 4.31619900  |
| C | 4.23678600  | -0.40011300 | -0.20461600 |
| C | 5.72816600  | -0.55178900 | 0.10247700  |
| C | 3.98311300  | 0.85925500  | -1.04317300 |
| H | 3.94498900  | -1.25624300 | -0.81703700 |
| H | 5.92029700  | -1.40280900 | 0.76405200  |
| H | 6.28350700  | -0.70589100 | -0.82770300 |
| H | 6.13630200  | 0.34704900  | 0.57648200  |
| H | 2.93307900  | 0.91517800  | -1.34712400 |
| H | 4.22148500  | 1.75851500  | -0.46350400 |
| H | 4.60965700  | 0.85256400  | -1.94217200 |

|   |             |             |             |
|---|-------------|-------------|-------------|
| C | -0.27895600 | -1.21387300 | 2.06689200  |
| C | -1.19298300 | -0.15008100 | 2.68460600  |
| C | -0.48102600 | -2.55826300 | 2.77729700  |
| H | -0.57722900 | -1.31507100 | 1.02015300  |
| H | -1.02248300 | 0.82775300  | 2.22472900  |
| H | -2.24016500 | -0.43550000 | 2.52997700  |
| H | -1.03612800 | -0.06164400 | 3.76551000  |
| H | 0.13610200  | -3.35165800 | 2.34416800  |
| H | -0.21586400 | -2.47377200 | 3.83755800  |
| H | -1.52933300 | -2.86932300 | 2.71360500  |
| H | -3.14674400 | 1.67040800  | 1.18392700  |
| C | -5.10015200 | -0.08559100 | 1.50372400  |
| C | -4.36260000 | 0.07415300  | 0.32821100  |
| C | -4.71599900 | -0.65096600 | -0.81449100 |
| C | -5.78211500 | -1.53922800 | -0.77194800 |
| C | -6.50513900 | -1.70778900 | 0.41054500  |
| C | -6.16573100 | -0.97995700 | 1.54826200  |
| H | -4.82893500 | 0.49115600  | 2.38549300  |
| H | -4.14155700 | -0.49097200 | -1.72132500 |
| H | -6.05699900 | -2.09973900 | -1.66023500 |
| H | -7.33872500 | -2.40297100 | 0.44133600  |
| H | -6.73190700 | -1.10661900 | 2.46569400  |
| C | -3.21881800 | 1.00778600  | 0.30566400  |
| N | -2.37191500 | 1.04625500  | -0.64377700 |
| C | -1.89371600 | -2.31841800 | -1.58433600 |
| H | -1.97379000 | -1.57698100 | -0.78106600 |
| H | -2.46287000 | -1.93588200 | -2.43594600 |
| H | -2.37132500 | -3.24626300 | -1.24953800 |

**VIII**

|   |             |             |             |
|---|-------------|-------------|-------------|
| C | 0.54947300  | 1.44156900  | 2.92256500  |
| C | 0.73629200  | 0.01031800  | 2.34807200  |
| C | 2.94179800  | 1.37125500  | 2.10849300  |
| C | 1.77859300  | 2.28707100  | 2.53100000  |
| H | 0.53008700  | 1.32589500  | 4.01706400  |
| H | 1.53574600  | 2.95946200  | 1.69751200  |
| H | 2.09496300  | 2.92439800  | 3.36599100  |
| C | 1.17820700  | 0.13946100  | 0.85798600  |
| C | 3.09744100  | 0.31545200  | 3.21974500  |
| H | 4.04440700  | -0.22300800 | 3.10741900  |
| H | 3.12929400  | 0.81829000  | 4.19536000  |
| C | 1.89348100  | -0.64326400 | 3.13008200  |
| H | 2.17054600  | -1.57658100 | 2.62164100  |
| H | 1.54002400  | -0.92303700 | 4.13011300  |
| N | 2.56491900  | 0.65032900  | 0.86832800  |
| C | -0.53637800 | -0.80723800 | 2.55047700  |
| H | -1.32404500 | -0.52624900 | 1.84757800  |
| H | -0.34420500 | -1.87494500 | 2.42588500  |
| H | -0.91599400 | -0.64012900 | 3.56719700  |
| C | 4.20482500  | 2.20339300  | 1.93668000  |
| H | 5.04918200  | 1.60699000  | 1.58462500  |
| H | 4.04808700  | 3.01350000  | 1.21670600  |
| H | 4.47162400  | 2.64550100  | 2.90207400  |
| C | 0.88184300  | -2.24631600 | -2.05985900 |
| C | 0.25404000  | -3.11758000 | -0.93262500 |
| B | 0.96674100  | -1.12670700 | -0.08555400 |
| O | 1.59752500  | -1.24573900 | -1.30314200 |
| O | 0.06955400  | -2.15205000 | 0.12652500  |
| C | -0.17233000 | -1.50807100 | -2.88473000 |
| H | 0.33393700  | -0.78011800 | -3.52545600 |

|   |             |             |             |
|---|-------------|-------------|-------------|
| H | -0.73741400 | -2.19598600 | -3.52100500 |
| H | -0.87435700 | -0.97344900 | -2.23461400 |
| C | 1.84937500  | -2.97599200 | -2.97711800 |
| H | 1.31750300  | -3.73509000 | -3.56124700 |
| H | 2.29920100  | -2.25936500 | -3.66987300 |
| H | 2.65243000  | -3.46500400 | -2.42339400 |
| C | -1.08589400 | -3.73649900 | -1.29395300 |
| H | -0.98553800 | -4.36286600 | -2.18773600 |
| H | -1.42685000 | -4.37697000 | -0.47340700 |
| H | -1.84212800 | -2.96951300 | -1.47741800 |
| C | 1.20076600  | -4.18749200 | -0.39284600 |
| H | 0.76649200  | -4.61002000 | 0.51763700  |
| H | 1.34738100  | -4.99524000 | -1.11657900 |
| H | 2.17536900  | -3.76031500 | -0.13902900 |
| C | 3.37964300  | 0.75097100  | -0.29879300 |
| C | 3.14623500  | 1.73009700  | -1.28583200 |
| C | 4.48043100  | -0.12512200 | -0.44668900 |
| C | 4.02367300  | 1.84143300  | -2.36745400 |
| C | 5.34953900  | 0.03586300  | -1.52623100 |
| C | 5.13177400  | 1.01593700  | -2.48471500 |
| H | 3.84021800  | 2.59965100  | -3.12527500 |
| H | 6.20460200  | -0.62895800 | -1.62504000 |
| H | 5.81529200  | 1.12919600  | -3.32107600 |
| C | 4.72447300  | -1.28329700 | 0.50542600  |
| C | 6.02277100  | -1.13361700 | 1.30758200  |
| C | 4.74765300  | -2.60962200 | -0.26396800 |
| H | 3.88039000  | -1.31008200 | 1.20067500  |
| H | 6.03138500  | -0.22714000 | 1.91883400  |
| H | 6.16066900  | -1.99204300 | 1.97457600  |
| H | 6.88762700  | -1.09061900 | 0.63551900  |



|   |             |             |             |
|---|-------------|-------------|-------------|
| H | 3.87795700  | -2.67434000 | -0.92123900 |
| H | 5.64620100  | -2.69526900 | -0.88526600 |
| H | 4.74008200  | -3.45975900 | 0.42762300  |
| C | 1.95307400  | 2.66946900  | -1.23947800 |
| C | 1.00776400  | 2.36309400  | -2.40806400 |
| C | 2.37102400  | 4.14418100  | -1.24911200 |
| H | 1.41377400  | 2.48726400  | -0.30625300 |
| H | 0.61297600  | 1.34409900  | -2.32801200 |
| H | 0.16910700  | 3.06895200  | -2.43283300 |
| H | 1.53353000  | 2.44569900  | -3.36551700 |
| H | 3.05278200  | 4.36981200  | -0.42327400 |
| H | 2.87727400  | 4.41077600  | -2.18303500 |
| H | 1.49139700  | 4.79003700  | -1.15157500 |
| H | 0.47813600  | 0.87420800  | 0.39648700  |
| C | -0.74306300 | 2.14649200  | 2.51394500  |
| H | -1.63927900 | 1.57816700  | 2.78066800  |
| H | -0.80235600 | 3.12593200  | 3.00119400  |
| H | -0.76577600 | 2.32025900  | 1.43258000  |
| C | -4.70960100 | -2.08322100 | -0.30061400 |
| C | -4.34687600 | -1.85267600 | 1.20181500  |
| B | -3.15685700 | -0.45237100 | -0.11357800 |
| O | -3.62904900 | -1.41043500 | -0.98302400 |
| O | -3.68404700 | -0.57105900 | 1.15570200  |
| C | -6.00106300 | -1.37939800 | -0.71470100 |
| H | -6.08318300 | -1.40974200 | -1.80430700 |
| H | -6.88064700 | -1.86602400 | -0.28291100 |
| H | -5.99298400 | -0.32899200 | -0.40498100 |
| C | -4.74322600 | -3.54065100 | -0.72990000 |
| H | -5.52170900 | -4.08071100 | -0.18005400 |
| H | -4.97152300 | -3.60282500 | -1.79769500 |

|   |             |             |             |
|---|-------------|-------------|-------------|
| H | -3.78480300 | -4.03147400 | -0.55409000 |
| C | -5.54122800 | -1.75431600 | 2.13640900  |
| H | -6.11585000 | -2.68673700 | 2.12382400  |
| H | -5.19247900 | -1.58017500 | 3.15784800  |
| H | -6.20066000 | -0.93056800 | 1.85459000  |
| C | -3.32605900 | -2.85839700 | 1.72955000  |
| H | -2.99308900 | -2.53276400 | 2.71918300  |
| H | -3.75645500 | -3.86092600 | 1.81657600  |
| H | -2.44500800 | -2.89630900 | 1.07887100  |
| C | -2.14079700 | 1.72649000  | -0.71686800 |
| N | -2.14739000 | 0.48851600  | -0.47093000 |
| C | -3.28475500 | 2.67081500  | -0.72581500 |
| C | -3.14277400 | 3.87064000  | -1.42812400 |
| C | -4.48129000 | 2.40637700  | -0.04950700 |
| C | -4.19271900 | 4.78063500  | -1.49105200 |
| H | -2.20415700 | 4.08184500  | -1.93545100 |
| C | -5.52525900 | 3.32229400  | -0.10312800 |
| H | -4.57559600 | 1.50523400  | 0.54945400  |
| C | -5.38675100 | 4.50465700  | -0.82977600 |
| H | -4.07863900 | 5.70441600  | -2.04928200 |
| H | -6.44789900 | 3.12003200  | 0.43204700  |
| H | -6.20610200 | 5.21578800  | -0.86985800 |
| H | -1.17967600 | 2.19450500  | -0.96842000 |

**TS4t**

|   |            |            |            |
|---|------------|------------|------------|
| C | 0.50655700 | 2.37036000 | 2.50830100 |
| C | 0.29121100 | 0.85893600 | 2.20030800 |
| C | 2.73921400 | 1.54734400 | 1.69103400 |
| C | 1.82216700 | 2.77531200 | 1.84366600 |
| H | 0.62645400 | 2.43094800 | 3.60028600 |

|   |             |             |             |
|---|-------------|-------------|-------------|
| H | 1.63302300  | 3.19168200  | 0.84346200  |
| H | 2.33929300  | 3.54877000  | 2.42381000  |
| C | 0.73557200  | 0.50000900  | 0.74706800  |
| C | 2.67260800  | 0.78280700  | 3.03134500  |
| H | 3.47366900  | 0.05234500  | 3.13169200  |
| H | 2.80443500  | 1.50903200  | 3.84308800  |
| C | 1.29436900  | 0.10622900  | 3.11114500  |
| H | 1.33710400  | -0.93977300 | 2.78547000  |
| H | 0.91581800  | 0.11480500  | 4.13978200  |
| N | 2.12276200  | 0.66518600  | 0.64383400  |
| C | -1.12622500 | 0.42135200  | 2.56695800  |
| H | -1.88180600 | 0.95437800  | 1.98759500  |
| H | -1.26736700 | -0.65173900 | 2.41173300  |
| H | -1.29836900 | 0.65625500  | 3.62556000  |
| C | 4.12684800  | 2.06310200  | 1.31993400  |
| H | 4.82951400  | 1.29249600  | 1.01190200  |
| H | 4.05396700  | 2.78391600  | 0.49896500  |
| H | 4.54034600  | 2.58287700  | 2.19070000  |
| C | 0.34680900  | -2.48788100 | -1.53229300 |
| C | 0.07067800  | -3.11349800 | -0.10624900 |
| B | -0.07218300 | -0.79260100 | -0.02904100 |
| O | 0.62250700  | -1.12294100 | -1.24715500 |
| O | -0.27641400 | -1.99751400 | 0.70617200  |
| C | -0.86825100 | -2.55694200 | -2.46578800 |
| H | -0.64674500 | -1.97710900 | -3.36735500 |
| H | -1.09860400 | -3.58592200 | -2.76153100 |
| H | -1.75718600 | -2.12137400 | -2.00117900 |
| C | 1.56093600  | -3.06457400 | -2.25405700 |
| H | 1.45309800  | -4.14170500 | -2.42487000 |
| H | 1.67080400  | -2.57011500 | -3.22460600 |

|   |             |             |             |
|---|-------------|-------------|-------------|
| H | 2.47483700  | -2.87675200 | -1.68422600 |
| C | -1.06124300 | -4.13706900 | -0.08152800 |
| H | -0.80682200 | -5.01284700 | -0.69031400 |
| H | -1.22221600 | -4.46578300 | 0.94971000  |
| H | -1.99757500 | -3.70737900 | -0.44108000 |
| C | 1.31776500  | -3.70968700 | 0.52956800  |
| H | 1.08298900  | -4.00804800 | 1.55638300  |
| H | 1.71222300  | -4.57679400 | -0.01072300 |
| H | 2.07653900  | -2.92990200 | 0.56816400  |
| C | 3.00379000  | 0.20410400  | -0.41756200 |
| C | 3.00027600  | 0.86468000  | -1.66495700 |
| C | 3.99718700  | -0.78193700 | -0.16622500 |
| C | 3.95732600  | 0.53810600  | -2.62795200 |
| C | 4.93575800  | -1.06203400 | -1.16513500 |
| C | 4.93016100  | -0.41571100 | -2.38899300 |
| H | 3.94424600  | 1.05825800  | -3.58146800 |
| H | 5.69653700  | -1.81168300 | -0.96805900 |
| H | 5.67524100  | -0.65103100 | -3.14263700 |
| C | 4.18356200  | -1.58177400 | 1.12460500  |
| C | 5.37904600  | -1.09374400 | 1.96817600  |
| C | 4.47395200  | -3.07541300 | 0.84248700  |
| H | 3.26279800  | -1.50645600 | 1.71254100  |
| H | 5.27863800  | -0.08221000 | 2.35813500  |
| H | 5.52357300  | -1.76695000 | 2.82068400  |
| H | 6.29060900  | -1.12606500 | 1.36048600  |
| H | 3.94972500  | -3.45582600 | -0.03492800 |
| H | 5.54546800  | -3.23398600 | 0.68069400  |
| H | 4.18357400  | -3.68216400 | 1.70598600  |
| C | 1.99941900  | 1.93935500  | -2.05621700 |
| C | 1.24795100  | 1.50157800  | -3.32388100 |

|   |             |             |             |
|---|-------------|-------------|-------------|
| C | 2.67016900  | 3.30161400  | -2.27346000 |
| H | 1.28468700  | 2.06370400  | -1.24056500 |
| H | 0.82829000  | 0.49973400  | -3.18988600 |
| H | 0.44264600  | 2.20101000  | -3.57497000 |
| H | 1.92406300  | 1.47553200  | -4.18453200 |
| H | 3.18247600  | 3.64623400  | -1.36991400 |
| H | 3.40829400  | 3.25682800  | -3.08127100 |
| H | 1.92137600  | 4.05425500  | -2.54569100 |
| H | 0.03481200  | 1.35678700  | 0.04042000  |
| C | -0.60468700 | 3.34482800  | 2.13276200  |
| H | -1.56211600 | 3.08962000  | 2.59554300  |
| H | -0.32871300 | 4.34964000  | 2.47277000  |
| H | -0.74867000 | 3.39636500  | 1.05090400  |
| C | -4.96260500 | -1.12573600 | -0.45010200 |
| C | -4.45334700 | -1.79409700 | 0.86684200  |
| B | -2.77468300 | -0.62436600 | -0.09896700 |
| O | -3.92247700 | -0.17209900 | -0.72729000 |
| O | -3.02692900 | -1.69591000 | 0.73049800  |
| C | -6.28578600 | -0.38679800 | -0.32406000 |
| H | -6.55789800 | 0.04467700  | -1.29132200 |
| H | -7.08319500 | -1.07156100 | -0.01561500 |
| H | -6.21702900 | 0.42543300  | 0.40306600  |
| C | -5.00586000 | -2.10095300 | -1.62529400 |
| H | -5.82809200 | -2.81608000 | -1.52464000 |
| H | -5.14507000 | -1.53254500 | -2.54868100 |
| H | -4.06622200 | -2.65796700 | -1.70559500 |
| C | -4.83365000 | -1.00344700 | 2.11903900  |
| H | -5.90355400 | -1.07657900 | 2.33671400  |
| H | -4.27181700 | -1.40224400 | 2.96794300  |
| H | -4.57180800 | 0.05494600  | 2.00931500  |

|   |             |             |             |
|---|-------------|-------------|-------------|
| C | -4.83581700 | -3.25639400 | 1.03423900  |
| H | -4.41409500 | -3.63745700 | 1.96848700  |
| H | -5.92488600 | -3.36786200 | 1.07551800  |
| H | -4.44943400 | -3.86598100 | 0.21507600  |
| C | -1.19265500 | 1.14485500  | -0.85340300 |
| N | -1.48200700 | -0.06745600 | -0.33479600 |
| C | -2.03691900 | 2.35530800  | -0.80763500 |
| C | -1.65846300 | 3.42923300  | -1.62483400 |
| C | -3.12687400 | 2.52452200  | 0.05612900  |
| C | -2.34854600 | 4.63487800  | -1.59073100 |
| H | -0.80094700 | 3.31445200  | -2.28270300 |
| C | -3.82078500 | 3.72669800  | 0.08714400  |
| H | -3.43595400 | 1.71507700  | 0.70556200  |
| C | -3.43514000 | 4.78601400  | -0.73312200 |
| H | -2.03804000 | 5.45471600  | -2.23064600 |
| H | -4.66433400 | 3.84131900  | 0.76076000  |
| H | -3.97775800 | 5.72567500  | -0.70043700 |
| H | -0.49816500 | 1.13536600  | -1.69410900 |

### VIII

|   |            |             |            |
|---|------------|-------------|------------|
| C | 0.62788700 | 2.06029200  | 2.68092500 |
| C | 0.57565000 | 0.52547000  | 2.41639400 |
| C | 2.92900500 | 1.44725700  | 1.83990500 |
| C | 1.94876100 | 2.59754500  | 2.11906800 |
| H | 0.62522000 | 2.17014000  | 3.77459000 |
| H | 1.77463700 | 3.13803900  | 1.17999100 |
| H | 2.42373900 | 3.30116800  | 2.81136000 |
| C | 1.01476000 | 0.23621100  | 0.98306100 |
| C | 3.00955200 | 0.58860300  | 3.11541900 |
| H | 3.83878700 | -0.11735800 | 3.07164500 |

|   |             |             |             |
|---|-------------|-------------|-------------|
| H | 3.21499100  | 1.27132000  | 3.94790200  |
| C | 1.66985200  | -0.13030900 | 3.30290500  |
| H | 1.73968600  | -1.18943300 | 3.02902400  |
| H | 1.33915300  | -0.08720200 | 4.34548700  |
| N | 2.26396400  | 0.60636100  | 0.76290000  |
| C | -0.77442300 | -0.06947300 | 2.81038400  |
| H | -1.59792800 | 0.38213900  | 2.26232100  |
| H | -0.80757100 | -1.14248300 | 2.60892700  |
| H | -0.92641700 | 0.10457500  | 3.88277000  |
| C | 4.26657900  | 2.04318200  | 1.41808600  |
| H | 4.98980700  | 1.31285000  | 1.06341500  |
| H | 4.13291400  | 2.78436700  | 0.62624700  |
| H | 4.68803900  | 2.55197300  | 2.29104800  |
| C | 0.36137700  | -2.06255000 | -1.82317300 |
| C | 0.21748800  | -2.89868100 | -0.49173100 |
| B | -0.03295000 | -0.60917100 | -0.06428800 |
| O | 0.62081800  | -0.74714200 | -1.35511200 |
| O | -0.15297400 | -1.94484700 | 0.49041900  |
| C | -0.91572800 | -2.05640900 | -2.67466300 |
| H | -0.77754400 | -1.34813300 | -3.49842600 |
| H | -1.12250200 | -3.04346800 | -3.10256200 |
| H | -1.79203900 | -1.73508900 | -2.10432000 |
| C | 1.53520100  | -2.47915500 | -2.70695000 |
| H | 1.44417800  | -3.52258700 | -3.02997500 |
| H | 1.55655800  | -1.84380700 | -3.59838400 |
| H | 2.48651800  | -2.34528900 | -2.18398200 |
| C | -0.84203700 | -3.99452400 | -0.54584900 |
| H | -0.61000100 | -4.73422700 | -1.32107700 |
| H | -0.88253100 | -4.50367300 | 0.42191500  |
| H | -1.82898000 | -3.56953700 | -0.73590100 |

|   |            |             |             |
|---|------------|-------------|-------------|
| C | 1.54457400 | -3.48226400 | -0.02890700 |
| H | 1.41607500 | -3.90425100 | 0.97322800  |
| H | 1.93688400 | -4.25919200 | -0.69400700 |
| H | 2.26248400 | -2.66456200 | 0.03318100  |
| C | 3.07446600 | 0.35693000  | -0.43592100 |
| C | 2.92719300 | 1.20776900  | -1.54682300 |
| C | 4.11476300 | -0.60003600 | -0.38565000 |
| C | 3.82269100 | 1.07707100  | -2.60937900 |
| C | 4.97587900 | -0.68489000 | -1.48475500 |
| C | 4.84367100 | 0.14164800  | -2.58792000 |
| H | 3.71340000 | 1.72975100  | -3.47018600 |
| H | 5.77464200 | -1.42030900 | -1.46414800 |
| H | 5.53188500 | 0.05740500  | -3.42303100 |
| C | 4.41965700 | -1.56080400 | 0.76622200  |
| C | 5.67023600 | -1.15864100 | 1.57331100  |
| C | 4.70419500 | -2.99188400 | 0.25236200  |
| H | 3.55129700 | -1.59547100 | 1.43440600  |
| H | 5.57596700 | -0.22429400 | 2.12531600  |
| H | 5.90456000 | -1.94802500 | 2.29564100  |
| H | 6.52764300 | -1.06052900 | 0.89817600  |
| H | 4.11376400 | -3.25447800 | -0.62555000 |
| H | 5.76126900 | -3.09828500 | -0.01343600 |
| H | 4.49169300 | -3.72065400 | 1.04044400  |
| C | 1.85199200 | 2.27295700  | -1.67555900 |
| C | 1.04853900 | 2.07619300  | -2.96913500 |
| C | 2.44196300 | 3.68970600  | -1.64357100 |
| H | 1.16538300 | 2.17546500  | -0.82947900 |
| H | 0.67290100 | 1.05155600  | -3.02823500 |
| H | 0.20198000 | 2.77116600  | -2.99413800 |
| H | 1.66760100 | 2.28362600  | -3.84820200 |



|   |             |             |             |
|---|-------------|-------------|-------------|
| H | 2.97145000  | 3.90201400  | -0.71000800 |
| H | 3.14928100  | 3.83452100  | -2.46740300 |
| H | 1.64256600  | 4.42984100  | -1.75234600 |
| H | -0.61320100 | 1.61460900  | -1.25202800 |
| C | -0.55416000 | 2.83457100  | 2.10966000  |
| H | -1.49258100 | 2.58289500  | 2.60791300  |
| H | -0.39205700 | 3.91169600  | 2.22491800  |
| H | -0.67849100 | 2.62444100  | 1.04072400  |
| C | -4.76257500 | -1.41564300 | -0.29703200 |
| C | -4.25260700 | -1.87079500 | 1.11136100  |
| B | -2.61530600 | -0.70139700 | 0.05661300  |
| O | -3.76676100 | -0.46755200 | -0.69171900 |
| O | -2.83571100 | -1.68244600 | 1.01491200  |
| C | -6.11985900 | -0.72467000 | -0.28992800 |
| H | -6.39438700 | -0.45219200 | -1.31291100 |
| H | -6.89424900 | -1.38921900 | 0.10939900  |
| H | -6.09174200 | 0.19074000  | 0.30485000  |
| C | -4.75889000 | -2.54251800 | -1.32955400 |
| H | -5.54719100 | -3.27591300 | -1.13202700 |
| H | -4.92364300 | -2.10767300 | -2.31937600 |
| H | -3.79523700 | -3.06050200 | -1.34404900 |
| C | -4.74993100 | -0.96350900 | 2.23852400  |
| H | -5.81843700 | -1.09988600 | 2.43272300  |
| H | -4.19262800 | -1.20233700 | 3.14898100  |
| H | -4.57350300 | 0.08957900  | 1.99442700  |
| C | -4.53255700 | -3.32723600 | 1.45142300  |
| H | -4.13692100 | -3.55169900 | 2.44617200  |
| H | -5.61012100 | -3.52565900 | 1.45590200  |
| H | -4.05159900 | -3.99808800 | 0.73627800  |
| C | -1.57450600 | 1.10460600  | -1.16476000 |

|   |             |            |             |
|---|-------------|------------|-------------|
| N | -1.43493800 | 0.05851600 | -0.16199400 |
| C | -2.61733700 | 2.18139700 | -0.90535900 |
| C | -2.89925900 | 3.08903900 | -1.92969900 |
| C | -3.28296000 | 2.33675200 | 0.30987000  |
| C | -3.80933100 | 4.12546500 | -1.74583100 |
| H | -2.40376400 | 2.97031700 | -2.89187200 |
| C | -4.19730800 | 3.36933200 | 0.50188300  |
| H | -3.07773800 | 1.63753300 | 1.11501200  |
| C | -4.46409600 | 4.27068800 | -0.52503600 |
| H | -4.01283700 | 4.81646300 | -2.55885300 |
| H | -4.70549100 | 3.46684400 | 1.45746000  |
| H | -5.17879100 | 5.07472400 | -0.37802400 |
| H | -1.77190100 | 0.68618700 | -2.16530400 |

**TS5t**

|   |            |             |            |
|---|------------|-------------|------------|
| C | 0.74041300 | 2.27493600  | 2.47540100 |
| C | 0.83042900 | 0.72141400  | 2.42423500 |
| C | 3.08134900 | 1.75938700  | 1.68494400 |
| C | 2.01228200 | 2.85357100  | 1.83291100 |
| H | 0.71972800 | 2.54540600  | 3.54132500 |
| H | 1.78609300 | 3.25511600  | 0.83729100 |
| H | 2.42379200 | 3.67698100  | 2.42796500 |
| C | 1.26200400 | 0.25050200  | 1.03659000 |
| C | 3.24841000 | 1.09407500  | 3.06417200 |
| H | 4.13698700 | 0.45977500  | 3.09114900 |
| H | 3.40956100 | 1.89649100  | 3.79365100 |
| C | 1.97451600 | 0.30080000  | 3.38312700 |
| H | 2.14193800 | -0.77764700 | 3.27152900 |
| H | 1.64934400 | 0.46599800  | 4.41631500 |
| N | 2.46181900 | 0.73619800  | 0.75730900 |

|   |             |             |             |
|---|-------------|-------------|-------------|
| C | -0.46476500 | 0.05259300  | 2.86671100  |
| H | -1.29740700 | 0.30880400  | 2.21338300  |
| H | -0.36339500 | -1.03686500 | 2.83353200  |
| H | -0.71570600 | 0.35210200  | 3.89245700  |
| C | 4.37693800  | 2.36341400  | 1.16274100  |
| H | 5.14255700  | 1.61906000  | 0.94700900  |
| H | 4.21241000  | 2.93738400  | 0.24784700  |
| H | 4.76475500  | 3.04556000  | 1.92653400  |
| C | 0.43842500  | -2.35107800 | -1.77596500 |
| C | 0.20356800  | -3.03831200 | -0.38480000 |
| B | -0.50625400 | -0.87370800 | -0.33327700 |
| O | 0.29981400  | -0.95674300 | -1.47404600 |
| O | -0.66795400 | -2.11926700 | 0.27615900  |
| C | -0.66132900 | -2.69116000 | -2.78523000 |
| H | -0.54656900 | -2.03996300 | -3.65698100 |
| H | -0.60935500 | -3.73261000 | -3.11837600 |
| H | -1.65170400 | -2.50599700 | -2.35221800 |
| C | 1.81297800  | -2.58934500 | -2.38185500 |
| H | 1.98206100  | -3.65793800 | -2.55871300 |
| H | 1.88690800  | -2.06603900 | -3.34063600 |
| H | 2.60164700  | -2.20310800 | -1.73102000 |
| C | -0.48388000 | -4.39548500 | -0.46310900 |
| H | 0.13211200  | -5.10944200 | -1.02135200 |
| H | -0.63092100 | -4.78593500 | 0.54836600  |
| H | -1.45997500 | -4.32363500 | -0.94715100 |
| C | 1.47195200  | -3.15634800 | 0.45052900  |
| H | 1.18818500  | -3.40168600 | 1.47914000  |
| H | 2.12391000  | -3.94825400 | 0.07086200  |
| H | 2.01060900  | -2.20462400 | 0.45983800  |
| C | 3.22011400  | 0.35583900  | -0.42672600 |

|   |             |             |             |
|---|-------------|-------------|-------------|
| C | 2.95709900  | 0.98274100  | -1.66069700 |
| C | 4.28326600  | -0.56498000 | -0.29321000 |
| C | 3.79419200  | 0.69211300  | -2.74128900 |
| C | 5.08884600  | -0.81384300 | -1.40808700 |
| C | 4.85877000  | -0.18783000 | -2.62283900 |
| H | 3.60984400  | 1.17577300  | -3.69543700 |
| H | 5.90963600  | -1.51982500 | -1.31678400 |
| H | 5.50023500  | -0.39058000 | -3.47494100 |
| C | 4.61025700  | -1.34529300 | 0.97717600  |
| C | 5.91217800  | -0.88099300 | 1.65247900  |
| C | 4.77655000  | -2.84780500 | 0.67558400  |
| H | 3.77731800  | -1.22595900 | 1.67818400  |
| H | 5.87917500  | 0.14509100  | 2.02018700  |
| H | 6.13923600  | -1.53294500 | 2.50309700  |
| H | 6.74523800  | -0.95462400 | 0.94445900  |
| H | 4.06296300  | -3.19886400 | -0.06965200 |
| H | 5.78324400  | -3.05699300 | 0.29782500  |
| H | 4.64286000  | -3.43418100 | 1.59012400  |
| C | 1.83429500  | 1.98490500  | -1.88213100 |
| C | 1.04381700  | 1.67671900  | -3.16203800 |
| C | 2.36909700  | 3.42228000  | -1.96455700 |
| H | 1.14905400  | 1.91291100  | -1.03074200 |
| H | 0.67210800  | 0.64950500  | -3.14988600 |
| H | 0.19229400  | 2.36138500  | -3.24539400 |
| H | 1.65992700  | 1.82820800  | -4.05433000 |
| H | 2.88813300  | 3.73307000  | -1.05456000 |
| H | 3.07228300  | 3.52003000  | -2.79952500 |
| H | 1.54334700  | 4.12127500  | -2.13441600 |
| H | -0.76694900 | 1.48952000  | -1.48178900 |
| C | -0.51086500 | 2.84155500  | 1.81286300  |

|   |             |             |             |
|---|-------------|-------------|-------------|
| H | -1.41679200 | 2.57094400  | 2.36030900  |
| H | -0.46093800 | 3.93502000  | 1.76684700  |
| H | -0.61451000 | 2.46145900  | 0.78949400  |
| C | -4.83375300 | -1.63331000 | -0.07132400 |
| C | -4.52161700 | -1.40829000 | 1.44268200  |
| B | -2.85638600 | -0.56399800 | 0.15848300  |
| O | -3.92074600 | -0.72172800 | -0.70861500 |
| O | -3.12859700 | -1.04970200 | 1.41698700  |
| C | -6.25391400 | -1.29409800 | -0.49260700 |
| H | -6.37476700 | -1.49001500 | -1.56174100 |
| H | -6.97612800 | -1.91083200 | 0.05356900  |
| H | -6.47735200 | -0.24067400 | -0.31255700 |
| C | -4.44783800 | -3.03706300 | -0.53695000 |
| H | -5.12817400 | -3.79852700 | -0.14328200 |
| H | -4.48252400 | -3.06705600 | -1.62984900 |
| H | -3.42702200 | -3.27120300 | -0.21481200 |
| C | -5.28569600 | -0.22099100 | 2.02763500  |
| H | -6.34592100 | -0.45528700 | 2.16569100  |
| H | -4.85284800 | 0.02797600  | 3.00086000  |
| H | -5.20278200 | 0.65506600  | 1.37635900  |
| C | -4.69653400 | -2.63694000 | 2.32176100  |
| H | -4.46767300 | -2.37826400 | 3.35949100  |
| H | -5.72913100 | -3.00043700 | 2.27757500  |
| H | -4.02253100 | -3.43899500 | 2.01501600  |
| C | -1.74163000 | 1.01534500  | -1.34310200 |
| N | -1.62113700 | 0.06602600  | -0.24043500 |
| C | -2.76696700 | 2.11185800  | -1.12988300 |
| C | -3.12950200 | 2.90812200  | -2.21977300 |
| C | -3.34689800 | 2.38211400  | 0.10955900  |
| C | -4.03923600 | 3.94987000  | -2.07653900 |

|   |             |            |             |
|---|-------------|------------|-------------|
| H | -2.69583400 | 2.69900800 | -3.19585700 |
| C | -4.26494700 | 3.42072800 | 0.25734500  |
| H | -3.07623400 | 1.77797500 | 0.97144100  |
| C | -4.61341800 | 4.21037400 | -0.83352700 |
| H | -4.30746000 | 4.55472500 | -2.93776100 |
| H | -4.70619900 | 3.61092600 | 1.23185100  |
| H | -5.32847700 | 5.01926000 | -0.71931700 |
| H | -1.96967300 | 0.50711500 | -2.29277800 |

**IXt**

|   |             |             |             |
|---|-------------|-------------|-------------|
| C | -2.59257600 | -2.31245800 | 2.49867700  |
| C | -2.76332600 | -0.77854400 | 2.68770600  |
| C | -4.52678000 | -1.64468300 | 1.00482800  |
| C | -3.63819800 | -2.80953900 | 1.47295800  |
| H | -2.79633800 | -2.77367400 | 3.47551600  |
| H | -3.14266600 | -3.27402700 | 0.61452700  |
| H | -4.29015700 | -3.57554300 | 1.90802600  |
| C | -2.68156600 | -0.06102100 | 1.34724600  |
| C | -5.24322000 | -1.12260800 | 2.26739800  |
| H | -6.01912300 | -0.40078200 | 1.99237300  |
| H | -5.75660200 | -1.97283700 | 2.72993400  |
| C | -4.19738700 | -0.51446000 | 3.21974200  |
| H | -4.33574700 | 0.56976700  | 3.31138000  |
| H | -4.28543400 | -0.93053300 | 4.23018000  |
| N | -3.60566100 | -0.54722400 | 0.54217100  |
| C | -1.73601100 | -0.20144700 | 3.65648500  |
| H | -0.72749000 | -0.25213600 | 3.23750200  |
| H | -1.95443400 | 0.85491400  | 3.84548800  |
| H | -1.74648100 | -0.73551200 | 4.61496800  |
| C | -5.51240900 | -2.06914100 | -0.07035200 |

|   |             |             |             |
|---|-------------|-------------|-------------|
| H | -6.13816400 | -1.23042600 | -0.39066400 |
| H | -5.00335500 | -2.47165100 | -0.95189400 |
| H | -6.16388500 | -2.85001700 | 0.33529100  |
| C | 0.39324500  | 2.61880100  | -1.01066400 |
| C | 0.99280100  | 2.90238600  | 0.40315400  |
| B | 2.27294500  | 1.40801700  | -0.68653800 |
| O | 1.08462800  | 1.40564000  | -1.38548400 |
| O | 2.33300200  | 2.37992700  | 0.28014100  |
| C | 0.78374400  | 3.68155900  | -2.03754000 |
| H | 0.51825100  | 3.32071500  | -3.03502300 |
| H | 0.25844500  | 4.62414500  | -1.85722400 |
| H | 1.86191600  | 3.87152800  | -2.01400500 |
| C | -1.10680200 | 2.38207000  | -1.03167700 |
| H | -1.63210000 | 3.30894400  | -0.77193600 |
| H | -1.42232500 | 2.08815400  | -2.03876200 |
| H | -1.41799500 | 1.60304800  | -0.32931000 |
| C | 1.07273900  | 4.37231700  | 0.78019800  |
| H | 0.07294200  | 4.81993200  | 0.78658900  |
| H | 1.49969700  | 4.46991100  | 1.78227800  |
| H | 1.70581500  | 4.92651700  | 0.08413900  |
| C | 0.29616600  | 2.09885600  | 1.49921600  |
| H | 0.89937200  | 2.15293500  | 2.41051800  |
| H | -0.70763200 | 2.47930000  | 1.71101300  |
| H | 0.18631200  | 1.04841900  | 1.20824100  |
| C | -3.79798100 | 0.09361000  | -0.74781800 |
| C | -3.21467800 | -0.47234000 | -1.89345900 |
| C | -4.52037400 | 1.29533300  | -0.80306200 |
| C | -3.39752500 | 0.17753900  | -3.11458600 |
| C | -4.66305200 | 1.91935000  | -2.04566900 |
| C | -4.11911100 | 1.36301200  | -3.19478500 |

|   |             |             |             |
|---|-------------|-------------|-------------|
| H | -2.95708000 | -0.24213800 | -4.01340600 |
| H | -5.20829100 | 2.85669500  | -2.11040500 |
| H | -4.24710100 | 1.85832700  | -4.15260900 |
| C | -5.08963900 | 1.96326400  | 0.43705100  |
| C | -6.53172800 | 2.44054100  | 0.24182300  |
| C | -4.17550400 | 3.10776900  | 0.88992800  |
| H | -5.09555500 | 1.22904600  | 1.24341200  |
| H | -7.17533000 | 1.63015700  | -0.11620100 |
| H | -6.93578700 | 2.80765200  | 1.19077300  |
| H | -6.59447700 | 3.26304100  | -0.47805700 |
| H | -3.18102500 | 2.71491300  | 1.12431900  |
| H | -4.07809900 | 3.86232500  | 0.10050200  |
| H | -4.58432600 | 3.59602100  | 1.78165000  |
| C | -2.31352400 | -1.68771100 | -1.79163800 |
| C | -0.88336300 | -1.24365800 | -1.46204700 |
| C | -2.32500600 | -2.57830400 | -3.03504800 |
| H | -2.66763800 | -2.29487900 | -0.95462000 |
| H | -0.85709300 | -0.63231000 | -0.55333300 |
| H | -0.24126400 | -2.11860600 | -1.31856700 |
| H | -0.46725900 | -0.63472600 | -2.27304500 |
| H | -3.34206100 | -2.86311200 | -3.32539900 |
| H | -1.85142100 | -2.08285600 | -3.88905100 |
| H | -1.75087900 | -3.48867500 | -2.83573000 |
| H | 2.36750500  | -0.11699500 | -2.73887000 |
| C | -1.17790600 | -2.70655900 | 2.06960900  |
| H | -0.43575900 | -2.45829800 | 2.83415900  |
| H | -1.12146300 | -3.78578200 | 1.88677000  |
| H | -0.89106100 | -2.19856400 | 1.14109600  |
| C | 6.67548200  | -0.23709400 | 0.18386300  |
| C | 6.08471300  | 0.58658300  | 1.37341500  |



|   |            |             |             |
|---|------------|-------------|-------------|
| B | 4.55141400 | 0.39232300  | -0.26375700 |
| O | 5.49308300 | -0.57149600 | -0.56628200 |
| O | 4.93284700 | 1.20848300  | 0.77458400  |
| C | 7.38643000 | -1.51970100 | 0.58450600  |
| H | 7.76808400 | -2.02164600 | -0.30901300 |
| H | 8.23356900 | -1.30020500 | 1.24346700  |
| H | 6.70764900 | -2.20488500 | 1.09572800  |
| C | 7.56613400 | 0.60518300  | -0.72826400 |
| H | 8.52134200 | 0.84281600  | -0.25026400 |
| H | 7.76426200 | 0.04153800  | -1.64391000 |
| H | 7.06826200 | 1.54103500  | -1.00092400 |
| C | 5.57430800 | -0.30570100 | 2.50448900  |
| H | 6.39788900 | -0.76137900 | 3.06268600  |
| H | 4.97948700 | 0.30415000  | 3.18946200  |
| H | 4.93556400 | -1.10335200 | 2.11031800  |
| C | 7.00146200 | 1.66837700  | 1.92053300  |
| H | 6.50299000 | 2.18690000  | 2.74410400  |
| H | 7.93060200 | 1.23016300  | 2.30095900  |
| H | 7.24545300 | 2.40512200  | 1.15285200  |
| C | 3.07584200 | -0.52603600 | -2.01145900 |
| N | 3.32134700 | 0.47894600  | -0.98091700 |
| C | 2.52247000 | -1.83822700 | -1.48202700 |
| C | 2.21851600 | -2.85465300 | -2.39291300 |
| C | 2.29325400 | -2.06492700 | -0.12662300 |
| C | 1.68907900 | -4.06558400 | -1.96259200 |
| H | 2.39191800 | -2.68658600 | -3.45399500 |
| C | 1.77057300 | -3.28224400 | 0.31065700  |
| H | 2.51136600 | -1.28136200 | 0.59338900  |
| C | 1.46068100 | -4.28383800 | -0.60332100 |
| H | 1.45367500 | -4.84082300 | -2.68608500 |

|   |            |             |             |
|---|------------|-------------|-------------|
| H | 1.59924400 | -3.44298900 | 1.37130800  |
| H | 1.04848800 | -5.22871800 | -0.26205300 |
| H | 4.01290500 | -0.73272300 | -2.53916600 |

### HBpin

|   |             |             |             |
|---|-------------|-------------|-------------|
| C | 0.77976800  | -0.18565100 | -0.05472600 |
| C | -0.77971300 | -0.18578100 | 0.05465200  |
| B | -0.00012700 | 1.93368800  | 0.00004300  |
| O | 1.06297300  | 1.18422000  | -0.41935900 |
| O | -1.06322600 | 1.18398700  | 0.41940100  |
| C | 1.34703600  | -1.10824700 | -1.12147000 |
| H | 2.43794800  | -1.03453300 | -1.12535700 |
| H | 1.07386700  | -2.14838100 | -0.91347500 |
| H | 0.98346600  | -0.83974300 | -2.11501500 |
| C | 1.46935000  | -0.43486700 | 1.28538700  |
| H | 1.35822000  | -1.47496500 | 1.60611200  |
| H | 2.53438200  | -0.21289900 | 1.17943200  |
| H | 1.05960000  | 0.21758900  | 2.06263200  |
| C | -1.46944400 | -0.43494000 | -1.28537100 |
| H | -1.35801500 | -1.47495600 | -1.60623400 |
| H | -2.53451500 | -0.21338500 | -1.17900500 |
| H | -1.06017200 | 0.21766100  | -2.06273200 |
| C | -1.34668900 | -1.10849300 | 1.12139200  |
| H | -2.43759700 | -1.03489500 | 1.12539900  |
| H | -1.07341500 | -2.14860200 | 0.91328900  |
| H | -0.98299100 | -0.84005900 | 2.11492300  |
| H | 0.00002600  | 3.12095600  | 0.00028700  |

### PhCN

|   |            |             |             |
|---|------------|-------------|-------------|
| C | 0.09084700 | -1.21463400 | -0.00000100 |
|---|------------|-------------|-------------|

|   |             |             |             |
|---|-------------|-------------|-------------|
| C | 1.48043600  | -1.20837800 | -0.00000300 |
| C | 2.17420000  | 0.00002100  | 0.00000300  |
| C | 1.48036300  | 1.20842100  | 0.00000000  |
| C | 0.09081000  | 1.21461900  | -0.00000400 |
| C | -0.60294700 | -0.00004300 | 0.00000300  |
| H | -0.46257900 | -2.14749800 | 0.00000200  |
| H | 2.02258200  | -2.14820200 | -0.00000500 |
| H | 3.25959800  | 0.00007400  | 0.00000600  |
| H | 2.02251800  | 2.14824100  | 0.00000000  |
| H | -0.46270800 | 2.14742800  | 0.00000100  |
| C | -2.04316800 | -0.00003100 | 0.00000100  |
| N | -3.20037900 | 0.00001500  | 0.00000000  |

## 5) References

- S1. E. Tomás-Mendivil, M. M. Hansmann, C. M. Weinstein, R. Jazzar, M. Melaimi and G. Bertrand, *J. Am. Chem. Soc.*, 2017, **139**, 7753-7756.
- S2. H.-C. Yu, S. M. Islam and N. P. Mankad, *ACS Catal.*, 2020, **10**, 3670-3675.
- S3. B. V. Rokade and K. R. Prabhu, *J. Org. Chem.*, 2012, **77**, 5364-5370.
- S4. T. Yabuta, M. Hayashi and R. Matsubara, *J. Org. Chem.*, 2021, **86**, 2545-2555.
- S5. S. Ando, M. Tsuzaki and T. Ishizuka, *J. Org. Chem.*, 2020, **85**, 11181-11189.
- S6. X. Wang and X. Xu, *RSC Adv.*, 2021, **11**, 1128-1133.
- S7. D. Bedi, A. Brar and M. Findlater, *Green Chem.*, 2020, **22**, 1125-1128.
- S8. H. Dai and H. Guan, *ACS Catal.*, 2018, **8**, 9125-9130.
- S9. K. Sarkar, K. Das, A. Kundu, D. Adhikari and B. Maji, *ACS Catal.*, 2021, 2786-2794.
- S10. S.-F. Hou, J.-Y. Chen, M. Xue, M. Jia, X. Zhai, R.-Z. Liao, C.-H. Tung and W. Wang, *ACS Catal.*, 2020, **10**, 380-390.

- S11. L. Zhao, C. Hu, X. Cong, G. Deng, L. L. Liu, M. Luo and X. Zeng, *J. Am. Chem. Soc.*, 2021, **143**, 1618-1629.
- S12. M. Bhunia, S. R. Sahoo, A. Das, J. Ahmed, P. Sreejyothi and S. K. Mandal, *Chem. Sci.*, 2020, **11**, 1848-1854.
- S13. N. Gandhamsetty, J. Jeong, J. Park, S. Park and S. Chang, *J. Org. Chem.*, 2015, **80**, 7281-7287.
- S14. G. Hahn, P. Kunas, N. de Jonge and R. Kempe, *Nat. Catal.*, 2019, **2**, 71-77.
- S15. K. Ganguli, A. Mandal, B. Sarkar and S. Kundu, *Tetrahedron*, 2020, **76**, 131439.
- S16. Q. Guan, M. Jiang, J. Wu, Y. Zhai, Y. Wu, K. Bao and W. Zhang, *Green Chem.*, 2016, **18**, 5794-5799.
- S17. S. Das, H. S. Das, B. Singh, R. K. Haridasan, A. Das and S. K. Mandal, *Inorg. Chem.*, 2019, **58**, 11274-11278.
- S18. K. Murugesan, Z. Wei, V. G. Chandrashekar, H. Jiao, M. Beller and R. V. Jagadeesh, *Chem. Sci.*, 2020, **11**, 4332-4339.
- S19. M. K. Bisai, K. Gour, T. Das, K. Vanka and S. S. Sen, *Dalton Trans.*, 2021, **50**, 2354-2358.
- S20. A. D. Ibrahim, S. W. Entsminger and A. R. Fout, *ACS Catal.*, 2017, **7**, 3730-3734.
- S21. C. Bornschein, S. Werkmeister, B. Wendt, H. Jiao, E. Alberico, W. Baumann, H. Junge, K. Junge and M. Beller, *Nat. Commun.*, 2014, **5**, 4111.
- S22. M. Sheng, S. Fujita, J. Yamasaki, K. Nakajima, S. Yamazoe, T. Mizugaki and T. Mitsudome, *JACS Au*, 2021, **1**, 501-507.
- S23. H. S. Das, S. Das, K. Dey, B. Singh, R. K. Haridasan, A. Das, J. Ahmed and S. K. Mandal, *Chem. Commun.*, 2019, **55**, 11868-11871.
- S24. J. Pecak, W. Eder, B. Stöger, S. Realista, P. N. Martinho, M. J. Calhorda, W. Linert and K. Kirchner, *Organometallics*, 2020, **39**, 2594-2601.

- S25. J. Neumann, C. Bornschein, H. Jiao, K. Junge and M. Beller, *Eur. J. Org. Chem.*, 2015, 5944-5948.
- S26. W. Yao, J. Wang, Y. Lou, H. Wu, X. Qi, J. Yang and A. Zhong, *Org. Chem. Front.*, 2021, **8**, 4554-4559.
- S27. W. Q. Wang, Y. Yuan, Y. Miao, B. Y. Yu, H. J. Wang, Z. Q. Wang, W. Sang, C. Chen and F. Verpoort, *Appl. Organomet. Chem.*, 2020, **34**, e5323.
- S28. C. Li, S. Song, Y. Li, C. Xu, Q. Luo, Y. Guo and X. Wang, *Nat. Commun.*, 2021, **12**, 3813.
- S29. V. Adebomi, M. Sriram, X. Streeby and M. Raj, *Org. Lett.*, 2021, **23**, 6189-6193.
- S30. P. Hohenberg and W. Kohn, *Phys. Rev.*, 1964, **136**, B864-B871.
- S31. M. J. Frisch, G. W. Trucks, H. B. Schlegel, G. E. Scuseria, M. A. Robb, J. R. Cheeseman, G. Scalmani, V. Barone, G. A. Petersson, H. Nakatsuji, et al. Gaussian 16, Revision C.01, Gaussian, Inc., Wallingford CT, 2016.
- S32. R. Logdi, A. Bag and A. K. Tiwari, *J. Phys. Chem. A* 2021, **125**, 5718-5725.
- S33. R. Logdi, A. Bag and A. K. Tiwari, *J. Mol. Graphics Modell.*, 2019, **93**, 107437.
